# Supplementary material for: Gene Expression Changes of Caenorhabditis elegans Larvae during Molting and Sleep-Like Lethargus
Source: PLoS One. 2014 Nov 19;9(11):e113269. doi: 10.1371/journal.pone.0113269 (PMC4237402; doi:10.1371/journal.pone.0113269)
Supplement: Table S1 — Genes with altered expression during sleep-like and wake behavior. (XLSX) [file pone.0113269.s001.xlsx]

## Sheet: Genes up regulated in sleep
Genes up redulated, oscillating	Genes up regulated, not oscillating
abu-1	acr-7
abu-10	C02E7.6
abu-11	C04E6.8
abu-3	C05E7.1
abu-4	C06E4.2
abu-6	C09G4.2
abu-7	C25D7.15
abu-8	C27A2.8
B0310.6	C29F3.3
B0334.13	C30H6.12
B0334.6	C34F11.3
B0403.5	C46H11.3
B0564.9	C54G4.4
bli-5	che-2
C02E7.7	cnc-8
C02F12.5	cutl-20
C04A11.1	cutl-21
C04G6.10	D2092.6
C04G6.7	dve-1
C05E7.2	F07C6.6
C06A1.6	F11E6.8
C06A1.7	F13B12.4
C06C3.3	F16B3.2
C06E8.5	F23F12.13
C06G1.1	F25G6.7
C10G8.3	F26F12.4
C11E4.1	F28C6.9
C11E4.2	F28E10.2
C11G10.1	F29G6.1
C13A2.11	F30F8.5
C13A2.5	F41C6.6
C14B9.3	F41F3.8
C15C8.8	F42C5.10
C17E7.13	F53H8.3
C18E9.7	F54E2.4
C25F6.8	F55H12.2
C26F1.1	F58H1.4
C27A2.5	F59E11.6
C27D9.2	fbxa-29
C31H5.1	fhod-2
C32C4.1	glb-25
C34E11.2	hil-7
C34E7.4	hot-5
C35A5.10	ifd-1
C35E7.7	ins-9
C36B7.5	inx-20
C40H5.4	K03A11.4
C41G7.7	K06A4.4
C41G7.8	K09B3.1
C42D4.3	K09H11.6
C46H11.2	K10B4.3
C50B8.6	K12B6.4
C50D2.2	lips-10
C50F4.8	nhr-127
C53A3.2	nhr-183
C54D10.9	nhr-63
C54D2.1	nhr-85
ccch-1	nipi-3
ceh-5	nlp-30
clec-109	nlp-34
clec-21	pha-2
clec-221	pha-4
clec-228	phat-4
clec-229	pqn-35
cnc-4	ptl-1
col-113	R11D1.12
col-120	str-168
col-13	T05C1.1
col-130	T06A1.5
col-133	T07F8.2
col-137	T11B7.2
col-141	T25D10.4
col-152	T27A10.5
col-155	tag-273
col-161	ttr-52
col-174	W10C4.1
col-33	Y22D7AL.14
col-58	Y38F1A.8
col-60	Y39G8B.10
col-61	Y41E3.3
col-65	Y43F8B.15
col-66	Y45F3A.5
col-69	Y46H3D.8
col-83	Y52B11A.4
col-88	Y59C2A.1
col-89	Y77E11A.14
cpg-7	Y82E9BR.21
cutl-11	ZC334.7
cutl-23	ZC416.1
cutl-24	ZC455.1
cutl-5	ZC513.1
cyp-34A2	ZK180.2
cyp-37B1
D1007.18
D2096.6
daf-10
dao-6
dat-1
dct-5
dsl-7
E01G6.1
F02D8.4
F07H5.8
F09C6.12
F13B12.3
F20B10.3
F21A3.3
F23F1.2
F23H11.6
F25B3.2
F25B5.3
F26G1.3
F26G1.5
F27E5.7
F28F5.6
F28H7.8
F29D10.2
F32D8.7
F33D11.8
F35A5.4
F35B12.4
F35B3.4
F36H1.11
F36H9.2
F38B7.2
F41D9.2
F41E6.11
F41G3.21
F44E7.2
F45E1.1
F45E4.5
F46C3.6
F46G11.1
F47C12.8
F48G7.5
F48G7.8
F49E10.4
F52A8.3
F53B3.3
F53F1.4
F54C9.3
F55B12.2
F55F8.8
F56B6.6
F57B1.5
F58B4.4
F58H7.1
F59B10.3
fbl-1
fbxa-37
fbxb-75
grd-14
grd-15
grd-5
grd-6
grl-16
grl-27
grl-31
grl-4
grl-6
grsp-1
H10E21.4
H14N18.4
H22K11.3
ins-12
ins-20
inx-19
jud-4
K01A6.7
K01D12.5
K01D12.8
K03A1.4
K03H9.3
K04C2.5
K07G5.4
K08B5.2
K08C7.4
K08D12.4
K09C8.7
K09H11.7
K10G9.1
K10H10.10
K10H10.4
lact-2
lagr-1
lec-3
lgc-18
lgc-21
lgc-31
lgg-1
lgx-1
lim-8
lips-17
M01A8.2
M01H9.5
M02G9.3
M03E7.2
M28.8
mlt-7
nas-1
nas-23
nas-25
nas-27
nas-30
nas-36
nas-38
nas-4
nhr-221
nlp-24
nnt-1
nrs-2
nspb-10
nspb-11
nspb-12
nspb-7
nspb-8
nspb-9
oac-48
otpl-8
phat-1
phat-2
pqm-96
pqn-29
pqn-36
pqn-5
pqn-54
pqn-63
pqn-71
pqn-74
pqn-78
pqn-90
pqn-91
pqn-95
ptr-20
ptr-23
ptr-3
R02E4.3
R03C1.1
R04A9.1
R05H5.8
R06A10.4
R07B1.9
R07E3.2
R08A2.5
R09F10.2
R09H10.8
R11.2
R12E2.7
R13H4.8
ram-5
sem-2
srz-78
ssq-4
str-131
str-146
T01B7.8
T01C3.11
T03F6.4
T05E7.4
T05H4.7
T06A1.1
T06D8.2
T06E4.10
T06E4.12
T06E4.8
T06E4.9
T06G6.12
T07D3.5
T07E3.4
T07G12.5a
T10E10.4
T10E9.3
T13C2.2
T14A8.2
T14E8.4
T16A9.3
T17H7.7
T20B6.3
T21C9.9
T21D12.14
T22B2.6
T22C8.6
T23B12.11
T23B12.5
T23F6.1
T24A6.21
T25B6.5
T25E4.1
T25F10.3
T26E4.10
T26E4.9
toh-1
tre-5
tsp-3
ttr-37
ttr-44
tyr-2
W01A8.6
W02F12.2
W03F8.6
W03F9.4
W05B2.7
W07E6.3
W08E12.3
xbx-4
Y102A11A.7
Y113G7B.12
Y38H6C.19
Y43E12A.2
Y43F8B.3
Y46E12BL.4
Y47D3B.6
Y47D7A.13
Y48G1BM.9
Y48G1BR.1
Y48G8AL.1
Y48G8AL.12
Y4C6B.2
Y51A2D.15
Y54G2A.11
Y57A10A.14
Y57E12AR.1
Y57G11B.2
Y57G11C.42
Y5H2A.4
Y65B4BL.6
Y66A7A.7
Y70D2A.1
Y71G12B.26
Y71G12B.31
Y71H2AM.16
Y77E11A.12
Y95B8A.2
ZC21.9
ZC84.1
ZK1010.4
ZK180.5
ZK662.2
ZK682.5
ZK792.4
ZK84.1
ZK909.3

## Sheet: Genes down regulated in sleep
Genes down regulated, oscillating	Genes down regulated, not oscillating
aat-4	cyp-44A1
acl-10	F42A8.1
acs-1	F43D2.7
C01F1.3	F52D2.5
C01G10.15	glc-2
C01H6.8	T03F6.6
C02F5.14	T13C2.6
C04F1.1	T13F3.6
C05D9.9	tag-340
C06H5.6	tdc-1
C07B5.2	ugt-63
C23H3.9	vha-7
C25G4.10	Y105C5B.15
C27C7.4
C31B8.8
C33B4.2
C33D3.3
C36A4.9
C41H7.1
C45B11.6
C45E5.1
C45G9.12
C49F5.8
C50D2.6
C54C6.7
cal-3
cdr-5
cdr-7
clec-172
clec-245
cnc-3
col-103
col-98
cpd-1
cpt-6
ctg-1
cyp-13A10
cyp-14A1
cyp-34A10
cyp-42A1
D1005.1
D1005.2
dhs-20
dhs-25
dhs-27
dpf-6
dpy-19
dpy-6
dpy-9
E01A2.10
E04D5.4
ech-9
F08C6.2
F13G3.3
F13H10.3
F13H6.4
F13H8.11
F14H3.12
F15D3.8
F15E6.4
F15H10.8
F21C10.4
F21G4.5
F22B3.7
F23F12.3
F25D1.3
F26D2.3
F26H9.5
F31C3.6
F32G8.4
F32H2.11
F33E2.4
F35B12.3
F37C12.10
F40A3.2
F41E6.12
F43C11.7
F43C9.1
F48D6.4
F49F1.7
F52G3.5
F53B3.5
F55C12.6
F55G11.7
F56H9.6
F59C6.16
far-4
fbn-1
fbxa-168
fbxa-190
fkb-7
gana-1
gly-11
gly-6
gst-12
gst-32
H11E01.2
H19M22.3a
H32K16.2
H41C03.1
hrg-4
K05F6.11
K10H10.2.2
kin-33
let-653
lrp-1
M79.3
mab-21
math-45
mlt-4
nas-3
nas-37
nhr-168
nhr-237
nhr-245
nhr-259
nhr-57
nhr-74
nit-1
noah-2
oac-54
R07A4.3
R07B7.5
R07E4.1
R08B4.4
R08E5.1
R08E5.2
R09E10.7
R186.6
R57.2
rhy-1
scl-5
spp-23
sulp-2
T01B11.5
T03D8.7
T04A11.2
T04A8.5
T07D3.4
T12G3.2
T14B4.5
T17H7.1
T28D6.3
tsp-16
ugt-14
ugt-39
ugt-42
ugt-60
ugt-8
W01C8.5
W01C9.1
W03D8.8
Y105C5B.14
Y110A2AL.3
Y12A6A.1
Y22D7AL.11
Y22D7AL.9
Y32B12C.3
Y37D8A.3
Y40B10A.7
Y40H7A.11
Y41D4B.14
Y43C5A.3
Y47D3B.4
Y48E1B.9
Y54G9A.4
Y73B6BL.24
Y73B6BL.31
ZC513.7
ZK1025.10
ZK1240.1
ZK228.3
ZK228.4
ZK381.2
ZK550.2
ZK669.2
ZK829.1
ztf-2

## Sheet: L3_S-L4_W
AgilentID	GenbankAccession	GeneSymbol	log2FC L3_S - L4_W	P.Value L3_S - L4_W	FDR L3_S - L4_W
A_12_P115280	NM_077154	col-175	-9.95885	3.17477e-07	0.000451341
A_12_P113006	NM_063910	bli-1	-9.84787	1.66869e-07	0.000313685
A_12_P100183	NM_068197	col-110	-9.39262	9.97754e-07	0.000904162
A_12_P176829	NM_182248	dpy-10	-9.38432	8.49878e-08	0.000228003
A_12_P135865	NM_076873	dpy-7	-9.32477	4.74921e-09	8.12708e-05
A_12_P102701	NM_064849	T17H7.1	-9.31502	1.28683e-08	9.45168e-05
A_12_P100166	NM_062965	dpy-10	-9.11436	7.59649e-08	0.000212905
A_12_P117007	NM_076873	dpy-7	-9.04796	4.79386e-08	0.000174082
A_12_P117404	NM_064029	C33B4.2	-9.02953	9.35406e-10	4.07811e-05
A_12_P116607	NM_075683	R57.2	-8.95465	6.51943e-09	8.26835e-05
A_12_P109572	NM_062966	dpy-2	-8.92757	2.04769e-07	0.000349332
A_12_P167574	NM_075973	Y102A11A.5	-8.8093	9.5451e-08	0.00024163
A_12_P179639	NM_067488	dpy-9	-8.79016	7.86317e-08	0.000218816
A_12_P167575	NM_075973	Y102A11A.5	-8.72006	1.13724e-07	0.000258872
A_12_P103537	NM_077451	lpr-4	-8.61505	3.53015e-07	0.00048037
A_12_P167577	NM_075973	Y102A11A.5	-8.53318	9.26839e-08	0.000239703
A_12_P112234	NM_072199	K08B12.1	-8.41733	2.21246e-07	0.000358966
A_12_P110650	NM_067488	dpy-9	-8.41112	1.75702e-08	0.000104456
A_12_P116279	NM_063887	C14A4.9	-8.39552	6.7118e-07	0.000721519
A_12_P101667	NM_075973	Y102A11A.5	-8.36645	2.87749e-08	0.00012686
A_12_P114531	NM_075839	H42K12.3	-8.24865	3.17174e-07	0.000451341
A_12_P107595	NM_070289	Y37A1B.7	-8.21339	2.18646e-06	0.0014251
A_12_P167576	NM_075973	Y102A11A.5	-8.12796	2.38965e-07	0.000375056
A_12_P112262	NM_060824	T06G6.6	-8.09292	3.12217e-07	0.00045039
A_12_P102986	NM_073245	col-149	-7.94755	4.47201e-07	0.000553534
A_12_P107544	NM_182273	dao-2	-7.90993	1.25464e-09	4.47536e-05
A_12_P109698	NM_058473	Y73E7A.8	-7.81615	1.05602e-06	0.000941717
A_12_P104196	NM_063194	R07G3.6	-7.79057	7.47785e-08	0.000211088
A_12_P101985	NM_072695	D1014.6	-7.76436	2.80278e-05	0.00544695
A_12_P110567	NM_171838	noah-1	-7.76268	1.30077e-08	9.45168e-05
A_12_P159939	NM_076506	C26B9.7	-7.74164	2.67356e-07	0.000401631
A_12_P101473	NM_076128	wrt-2	-7.71456	2.953e-06	0.00167198
A_12_P100520	NM_076068	T03G6.1	-7.6907	2.41413e-07	0.000377389
A_12_P117224	NM_071016	cnc-3	-7.66419	4.76388e-09	8.12708e-05
A_12_P101310	NM_077909	M03B6.3	-7.60246	7.81035e-06	0.00270484
A_12_P167595	NM_072199	K08B12.1	-7.58549	2.84308e-06	0.00163331
A_12_P103207	NM_077448	lpr-3	-7.56366	1.17477e-07	0.000258872
A_12_P106102	NM_077450	W04G3.2	-7.54613	1.03171e-07	0.000250152
A_12_P113803	NM_058705	col-49	-7.48339	9.76058e-06	0.00302026
A_12_P105856	NM_064435	E01G4.6	-7.40364	2.05787e-05	0.00451599
A_12_P100911	NM_059257	ptr-10	-7.39635	1.08864e-08	9.40655e-05
A_12_P115857	NM_073595	F58H1.2	-7.39623	7.26584e-07	0.000752225
A_12_P167597	NM_072199	K08B12.1	-7.3952	6.51878e-07	0.000713314
A_12_P115270	NM_063179	wrt-10	-7.38938	4.57081e-08	0.000171104
A_12_P107773	NM_076297	F09F9.2	-7.35989	6.10982e-08	0.00019015
A_12_P159938	NM_076506	C26B9.7	-7.35745	6.54458e-07	0.000713314
A_12_P114377	NM_182248	dpy-10	-7.35367	1.61392e-07	0.000305924
A_12_P159935	NM_076506	C26B9.7	-7.3494	9.2857e-08	0.000239703
A_12_P102117	NM_068828	clec-180	-7.32366	9.51406e-08	0.00024163
A_12_P110624	NM_078192	wrt-4	-7.31473	8.53978e-06	0.00282054
A_12_P143460	NM_069407	msd-1	-7.31386	0.000373787	0.0316497
A_12_P167594	NM_072199	K08B12.1	-7.27697	8.72511e-07	0.000839922
A_12_P112619	NM_076457	Y64H9A.2	-7.25586	3.29709e-06	0.00177469
A_12_P109530	NM_070587	Y43D4A.5	-7.25351	2.2471e-06	0.0014398
A_12_P110656	NM_062559	F58A6.9	-7.1941	9.17895e-05	0.011551
A_12_P108174	NM_063178	wrt-1	-7.15214	2.79462e-07	0.000413788
A_12_P101315	NM_062703	bli-2	-7.11738	7.90699e-06	0.00271289
A_12_P106578	NM_070199	Y38H8A.1	-7.08638	4.57875e-08	0.000171104
A_12_P101663	NM_070298	noah-2	-7.0853	8.33577e-09	9.12813e-05
A_12_P112371	NM_076472	dpy-8	-6.99918	8.82675e-07	0.000842223
A_12_P119415	NM_063567	T26C5.2	-6.97368	8.42801e-06	0.00279775
A_12_P149655	NM_069410	msd-2	-6.92689	0.000527592	0.0407748
A_12_P120138	NM_062925	F18C5.5	-6.91579	2.67491e-07	0.000401631
A_12_P116579	NM_059443	ZC328.1	-6.90927	1.02592e-07	0.000250152
A_12_P100844	NM_076634	T13C5.3	-6.85817	4.70373e-06	0.00209018
A_12_P108022	NM_068859	F33D4.6	-6.85426	4.08757e-07	0.00053371
A_12_P108159	NM_063032	C15F1.2	-6.82348	7.96918e-08	0.000220205
A_12_P103489	NM_068860	F33D4.6	-6.78435	2.26837e-08	0.00012536
A_12_P101734	NM_077330	R07E3.6	-6.74228	2.38934e-06	0.00148012
A_12_P112331	NM_073660	lon-3	-6.74093	2.79165e-06	0.00162278
A_12_P117309	NM_073486	F55C10.4	-6.67302	3.30507e-05	0.00595968
A_12_P101565	NM_001047230	W03D8.11	-6.62485	7.39539e-06	0.00263318
A_12_P101095	NM_069774	col-128	-6.61985	0.000118018	0.0137984
A_12_P111007	NM_069209	Y11D7A.5	-6.61455	6.53552e-07	0.000713314
A_12_P150975	NM_070716	grl-24	-6.60893	8.86145e-07	0.000842223
A_12_P100367	NM_060784	W02D9.5	-6.57348	0.000285897	0.0259482
A_12_P102765	NM_068483	glf-1	-6.55948	5.62802e-06	0.00228048
A_12_P120112	NM_070716	grl-24	-6.54833	5.47362e-07	0.000635418
A_12_P113278	NM_001047500	K08E7.5	-6.51939	1.17666e-07	0.000258872
A_12_P143280	NM_171428	F11E6.9	-6.50727	2.10123e-07	0.000355375
A_12_P143283	NM_171428	F11E6.9	-6.47595	3.48727e-07	0.000478432
A_12_P107230	NM_064637	F19H8.4	-6.47445	1.98849e-05	0.00443114
A_12_P100460	NM_073863	F42E8.2	-6.4581	0.000145549	0.0159304
A_12_P134971	NM_001038257	C02F5.14	-6.45076	4.81143e-08	0.000174082
A_12_P108352	NM_072175	F17A9.3	-6.44914	2.35567e-06	0.00146674
A_12_P139790	NM_075592	mlt-11	-6.44266	1.16677e-07	0.000258872
A_12_P100661	NM_058475	Y71G12B.18	-6.40619	0.000151089	0.0163676
A_12_P159937	NM_076506	C26B9.7	-6.40539	9.15551e-06	0.00291118
A_12_P168569	NM_060531	nhr-245	-6.38162	1.86263e-08	0.000109082
A_12_P113213	NM_067191	grl-15	-6.36913	1.21508e-08	9.40655e-05
A_12_P106403	NM_073299	F25D1.3	-6.36316	1.0003e-08	9.12813e-05
A_12_P132672	NM_061418	F46F5.6	-6.34661	9.81417e-06	0.00302026
A_12_P115537	NM_064674	cdh-7	-6.30146	1.22117e-08	9.40655e-05
A_12_P119476	NM_061421	F46F5.6	-6.29357	5.43266e-05	0.0081766
A_12_P159540	NM_058623	F32B5.4	-6.28606	0.000115213	0.0135797
A_12_P136645	NM_068296	ssp-11	-6.28471	8.94431e-05	0.0113467
A_12_P108292	NM_069366	ssp-10	-6.26786	9.46699e-05	0.0117849
A_12_P106103	NM_001136298	F33H2.8	-6.25284	6.70589e-07	0.000721519
A_12_P132670	NM_061418	F46F5.6	-6.22692	1.83493e-05	0.00426781
A_12_P111667	NM_060520	nhr-73	-6.22517	1.98962e-08	0.000114806
A_12_P156920	NM_069379	sss-1	-6.21179	0.00025702	0.0240591
A_12_P112300	NM_076645	C14F11.6	-6.19252	7.7324e-07	0.000776659
A_12_P159542	NM_058623	F32B5.4	-6.18949	0.00011689	0.0137196
A_12_P159936	NM_076506	C26B9.7	-6.18374	2.69188e-06	0.00159551
A_12_P153750	NM_068298	ssp-11	-6.18079	6.86067e-05	0.00954934
A_12_P159081	NM_069480	F01G10.9	-6.15692	3.66059e-06	0.00186053
A_12_P163113	NM_061234	sqt-2	-6.15376	7.19985e-05	0.00982965
A_12_P159543	NM_058623	F32B5.4	-6.15022	5.59963e-05	0.00833812
A_12_P143282	NM_171428	F11E6.9	-6.14558	2.96876e-07	0.000433124
A_12_P167598	NM_072199	K08B12.1	-6.14498	4.80422e-05	0.00758279
A_12_P145240	NM_001026179	clec-225	-6.10478	6.23e-08	0.000190976
A_12_P104361	NM_067061	T28D6.3	-6.09389	1.43963e-07	0.000283169
A_12_P159544	NM_058623	F32B5.4	-6.0914	0.000196708	0.0198313
A_12_P103857	NM_068298	ssp-11	-6.09135	7.993e-05	0.0105676
A_12_P117521	NM_077042	H03E18.1	-6.07412	4.44215e-07	0.000553534
A_12_P118250	NM_076781	ugt-57	-6.07336	9.13326e-07	0.000859392
A_12_P132674	NM_061418	F46F5.6	-6.05131	1.84119e-05	0.00427286
A_12_P134970	NM_001038257	C02F5.14	-6.0389	1.92936e-07	0.000339251
A_12_P101391	NM_059196	F27C1.1	-5.99702	0.000564003	0.0427569
A_12_P132671	NM_061418	F46F5.6	-5.99414	2.99433e-05	0.00564635
A_12_P102201	NM_069340	T13F2.9	-5.98647	0.000369204	0.03137
A_12_P135280	NM_061234	sqt-2	-5.9819	1.41538e-05	0.0037123
A_12_P100395	NM_072934	R03H4.6	-5.9762	1.70576e-06	0.00122989
A_12_P167596	NM_072199	K08B12.1	-5.95729	2.91796e-05	0.00556604
A_12_P140340	NM_069480	F01G10.9	-5.93947	3.97586e-06	0.00193169
A_12_P109497	NM_069588	ZC168.6	-5.92775	9.83165e-05	0.0120969
A_12_P159541	NM_058623	F32B5.4	-5.90648	7.47889e-05	0.0100774
A_12_P111513	NM_061452	R07C3.13	-5.90372	1.58049e-06	0.00117898
A_12_P150600	NM_062457	msp-3	-5.88965	0.000176734	0.0183504
A_12_P151165	NM_060114	F30A10.2	-5.8879	5.38772e-08	0.000180684
A_12_P132673	NM_061418	F46F5.6	-5.87042	2.18508e-05	0.00467998
A_12_P137365	NM_060531	nhr-73	-5.86036	4.10781e-07	0.00053371
A_12_P175342	NM_063567	T26C5.2	-5.84306	0.000214557	0.0212004
A_12_P140065	NM_068297	ssq-2	-5.84025	0.000193803	0.0196242
A_12_P101965	NM_064939	cdh-12	-5.83706	1.95176e-05	0.00439117
A_12_P112451	NM_063324	qua-1	-5.8259	8.52143e-07	0.000833815
A_12_P113607	NM_070448	Y73F8A.14	-5.82388	9.35303e-06	0.00294298
A_12_P155071	NM_001276751	Y46G5A.38	-5.81608	4.18079e-06	0.00198121
A_12_P110541	NM_069085	cdh-5	-5.81129	0.000349805	0.0301991
A_12_P105149	NM_072648	F26D11.2	-5.80289	6.22093e-05	0.00898394
A_12_P173649	NM_060114	F30A10.2	-5.79755	1.46396e-07	0.000285763
A_12_P155073	NM_001276751	Y46G5A.38	-5.79471	1.71769e-06	0.00122989
A_12_P159080	NM_069480	F01G10.9	-5.77144	5.60678e-06	0.00227827
A_12_P135063	NM_001025966	BE10.5	-5.74872	3.80161e-06	0.00188592
A_12_P112650	NM_060349	nlp-4	-5.72446	2.151e-07	0.000357627
A_12_P111495	NM_171697	T13C5.7	-5.70443	2.9301e-06	0.00166594
A_12_P145560	NM_068351	msp-57	-5.70395	0.000250036	0.0235497
A_12_P100530	NM_069362	nspd-2	-5.70213	0.000322431	0.0283982
A_12_P150170	NM_069412	msd-1	-5.70033	0.000111158	0.0132519
A_12_P113564	NM_077986	C11H1.5	-5.69816	8.9986e-06	0.00288005
A_12_P110857	NM_068932	F57H12.6	-5.69363	6.10603e-07	0.00068453
A_12_P133253	NM_062464	msp-40	-5.68687	7.87495e-05	0.0104708
A_12_P133254	NM_062464	msp-40	-5.68463	0.000104095	0.0125945
A_12_P131795	NM_068354	msp-53	-5.66412	0.000164794	0.0173914
A_12_P155072	NM_001276751	Y46G5A.38	-5.64957	1.8428e-05	0.00427286
A_12_P133250	NM_062464	msp-40	-5.64846	5.5984e-05	0.00833812
A_12_P115014	NM_062748	msp-64	-5.647	0.0001427	0.015706
A_12_P119890	NM_069328	K01H12.4	-5.64619	4.23348e-05	0.0069971
A_12_P106462	NM_069317	ZK1251.1	-5.64201	4.67899e-05	0.00744161
A_12_P115887	NM_062474	nspd-5	-5.64019	1.39516e-05	0.00366907
A_12_P175343	NM_063567	T26C5.2	-5.62928	1.55716e-05	0.00388612
A_12_P147025	NM_070448	Y73F8A.14	-5.62785	1.30712e-05	0.00352737
A_12_P139740	NM_062487	msp-33	-5.62483	0.000132157	0.0148795
A_12_P143281	NM_171428	F11E6.9	-5.6227	3.39698e-06	0.00180012
A_12_P117613	NM_060527	ZK1025.3	-5.61534	7.22566e-06	0.00258963
A_12_P133251	NM_062464	msp-40	-5.60117	5.44646e-05	0.00818795
A_12_P177020	NM_068371	ZK354.6	-5.60093	1.07716e-05	0.00318502
A_12_P175654	NM_062474	nspd-4	-5.59774	1.16905e-05	0.00332114
A_12_P115187	NM_059518	T23B3.5	-5.59218	2.06526e-05	0.00452208
A_12_P157290	NM_068310	msp-55	-5.58201	0.000296892	0.0267308
A_12_P112023	NM_074726	F57G8.7	-5.55686	9.00542e-06	0.00288005
A_12_P102588	NM_061354	mlt-10	-5.54774	2.21395e-07	0.000358966
A_12_P120059	NM_069448	msp-38	-5.54548	0.000157492	0.0168427
A_12_P112609	NM_065614	msd-4	-5.54079	4.3006e-05	0.00707095
A_12_P155070	NM_001276751	Y46G5A.38	-5.53741	1.30284e-05	0.00351825
A_12_P133252	NM_062464	msp-40	-5.53481	6.33615e-05	0.00910676
A_12_P136150	NM_068377	msp-59	-5.51875	0.000302708	0.0271079
A_12_P105183	NM_069063	Y59H11AM.1	-5.51044	0.00010023	0.0122555
A_12_P175659	NM_060413	B0205.4	-5.50506	2.30848e-06	0.00146095
A_12_P152320	NM_073044	nas-3	-5.49788	5.81105e-07	0.000658991
A_12_P120255	NM_069361	msp-56	-5.49271	0.000122094	0.0141136
A_12_P114398	NM_068329	nspd-3	-5.48736	0.000228917	0.0221508
A_12_P104127	NM_059191	F27C1.3	-5.48199	7.88126e-06	0.00271289
A_12_P175123	NM_076216	T27A10.6	-5.47907	6.00921e-06	0.00234111
A_12_P119688	NM_070797	B0554.4	-5.4688	0.000331378	0.0290363
A_12_P118717	NM_064333	Y46G5A.29	-5.46682	3.15669e-06	0.00173474
A_12_P119265	NM_059358	nspd-1	-5.45954	1.84306e-05	0.00427286
A_12_P134310	NM_062500	msp-152	-5.45186	0.000112043	0.013314
A_12_P113847	NM_060309	ZC434.3	-5.44907	3.30014e-06	0.00177469
A_12_P104994	NM_066662	C38C10.3	-5.43407	7.28636e-06	0.00260381
A_12_P139742	NM_062487	msp-33	-5.43264	7.80294e-05	0.0103962
A_12_P118627	NM_062302	dos-2	-5.42549	0.000546161	0.0417576
A_12_P146520	NM_069361	msp-56	-5.42445	0.000111127	0.0132519
A_12_P101589	NM_001028923	grl-7	-5.422	6.39684e-05	0.00915415
A_12_P106680	NM_181957	Y41C4A.18	-5.41616	4.61232e-06	0.0020683
A_12_P132370	NM_068359	msp-53	-5.40532	0.000185322	0.0190007
A_12_P111857	NM_062392	T05C1.3	-5.39471	3.84326e-05	0.00655652
A_12_P152825	NM_060917	ssp-31	-5.39266	0.000222418	0.0217039
A_12_P175147	NM_001028923	grl-7	-5.39128	1.73321e-05	0.00413165
A_12_P109123	NM_062571	msp-50	-5.3637	9.29042e-05	0.0116361
A_12_P147640	NM_069340	T13F2.9	-5.34671	0.000277437	0.0253515
A_12_P103163	NM_068288	E03H12.5	-5.33995	1.36813e-05	0.00361495
A_12_P150755	NM_001038326	F56D6.13	-5.33086	5.30455e-05	0.00803372
A_12_P115009	NM_059144	osr-1	-5.33011	9.83533e-06	0.00302204
A_12_P134180	NM_001026590	Y47G6A.15	-5.33001	9.02837e-07	0.000853616
A_12_P139741	NM_062487	msp-33	-5.3291	6.86064e-05	0.00954934
A_12_P131485	NM_069341	msp-78	-5.32818	0.000141764	0.0156336
A_12_P116101	NM_062743	msp-142	-5.31816	8.13711e-05	0.0106854
A_12_P114388	NM_068317	C02B10.6	-5.3155	1.43294e-06	0.00112901
A_12_P101889	NM_062558	msp-42	-5.30909	0.000131259	0.0148082
A_12_P112948	NM_078111	mlt-9	-5.30545	6.58672e-06	0.00246815
A_12_P115362	NM_073675	F55C5.1	-5.30395	8.56747e-06	0.00282207
A_12_P108583	NM_062767	H41C03.1	-5.30383	2.12259e-10	2.77617e-05
A_12_P140756	NM_065675	C45G9.4	-5.3032	8.17834e-06	0.00275922
A_12_P139230	NM_069358	msp-81	-5.30124	0.0001672	0.0175885
A_12_P114725	NM_001027389	F34D10.8	-5.29526	1.33405e-05	0.00356435
A_12_P170042	NM_062571	msp-50	-5.29155	7.3131e-05	0.00991728
A_12_P113883	NM_075438	Y116F11B.2	-5.29128	8.96156e-05	0.011354
A_12_P109420	NM_060413	B0205.4	-5.28742	3.78197e-06	0.00188318
A_12_P140315	NM_068288	E03H12.5	-5.2832	1.26525e-05	0.00346928
A_12_P100071	NM_069827	scl-18	-5.28142	0.000581297	0.0437478
A_12_P155074	NM_001276751	Y46G5A.38	-5.27005	1.55885e-06	0.00117301
A_12_P116559	NM_069321	msp-76	-5.2595	0.000138199	0.0153702
A_12_P144542	NM_070446	Y73F8A.12	-5.25573	1.20133e-05	0.00337417
A_12_P142895	NM_068354	msp-55	-5.23918	0.000141302	0.0156003
A_12_P174830	NM_001047500	K08E7.5	-5.2323	2.91283e-07	0.00042806
A_12_P115591	NM_070446	Y73F8A.12	-5.23146	1.01339e-05	0.00306577
A_12_P104684	NM_074229	R08A2.3	-5.23141	0.000349342	0.0301657
A_12_P116927	NM_058787	Y47G6A.26	-5.22908	1.05383e-05	0.00313732
A_12_P104788	NM_062548	msp-74	-5.2212	8.00903e-05	0.010575
A_12_P104827	NM_069072	F42A9.3	-5.21668	7.89382e-06	0.00271289
A_12_P137625	NM_068436	C39H7.1	-5.2138	1.36643e-05	0.00361288
A_12_P139250	NM_069339	msp-79	-5.20767	0.000167544	0.0176199
A_12_P148780	NM_001038393	F32D1.11	-5.20746	0.000180498	0.0186327
A_12_P108788	NM_068370	msp-51	-5.20725	0.000164869	0.0173915
A_12_P120275	NM_062569	msp-49	-5.20667	0.000127361	0.0144724
A_12_P103511	NM_061234	sqt-2	-5.19931	3.1351e-07	0.000450599
A_12_P110150	NM_171336	ZK354.2	-5.18877	5.94575e-07	0.000670147
A_12_P148781	NM_001038393	F32D1.11	-5.18611	0.000276418	0.0252878
A_12_P135060	NM_001025966	BE10.5	-5.17714	3.99747e-05	0.00673915
A_12_P172822	NM_066662	C38C10.3	-5.15841	1.71511e-06	0.00122989
A_12_P148782	NM_001038393	F32D1.11	-5.15168	0.000209179	0.0207841
A_12_P103700	NM_077449	lpr-6	-5.14676	2.45239e-08	0.000125516
A_12_P133170	NM_060521	nhr-259	-5.14518	6.6227e-07	0.000716148
A_12_P110248	NM_076603	F22F4.1	-5.1449	9.95183e-07	0.000904162
A_12_P140318	NM_068288	E03H12.5	-5.14322	2.15586e-05	0.00463511
A_12_P103630	NM_070449	Y73F8A.15	-5.13492	3.30175e-06	0.00177469
A_12_P135165	NM_069433	msp-36	-5.13072	9.99671e-05	0.0122314
A_12_P140316	NM_068288	E03H12.5	-5.12859	3.19407e-05	0.00583655
A_12_P132540	NM_001083216	F35G2.5	-5.12094	3.38616e-05	0.00604205
A_12_P113366	NM_065675	C45G9.4	-5.10213	6.33907e-06	0.00241642
A_12_P120342	NM_063323	T05C12.9	-5.10164	1.52585e-06	0.0011648
A_12_P173938	NM_061406	Y39F10A.3	-5.1004	1.53609e-06	0.00116807
A_12_P120231	NM_065316	C34C12.6	-5.09968	1.43575e-07	0.000283169
A_12_P179004	NM_076612	ptr-4	-5.09499	1.71703e-07	0.000313685
A_12_P110792	NM_062753	ZK1248.4	-5.09469	0.000103928	0.0125782
A_12_P179006	NM_076612	ptr-4	-5.09312	1.44187e-07	0.000283169
A_12_P180969	NM_001083195	nspd-3	-5.08946	9.6763e-06	0.00301043
A_12_P102784	NM_072354	Y57E12B.3	-5.08196	5.59738e-09	8.26835e-05
A_12_P168364	NM_062505	ZK546.3	-5.07903	7.15738e-05	0.0098027
A_12_P140979	NM_062497	msp-31	-5.0669	4.48136e-05	0.00724506
A_12_P133076	NM_078110	mlt-9	-5.06548	1.55427e-05	0.00388612
A_12_P110443	NM_001027923	C53D6.10	-5.06394	0.000100322	0.0122629
A_12_P133075	NM_078110	mlt-9	-5.06177	2.10729e-05	0.00458341
A_12_P137606	NM_063116	C30G12.4	-5.05821	2.7706e-06	0.00161906
A_12_P155570	NM_060001	T08G11.2	-5.04237	8.67964e-05	0.0111333
A_12_P135061	NM_001025966	BE10.5	-5.04144	1.453e-05	0.00374341
A_12_P171742	NM_061354	mlt-10	-5.03841	1.07694e-07	0.000254556
A_12_P138166	NM_001038263	C29E4.14	-5.03824	8.26076e-06	0.00277272
A_12_P173648	NM_060114	F30A10.2	-5.03586	4.98809e-08	0.000176324
A_12_P105474	NM_062879	C32D5.12	-5.03407	7.18353e-08	0.000206244
A_12_P156415	NM_001083137	K12C11.5	-5.03112	8.11539e-06	0.00274743
A_12_P173647	NM_060114	F30A10.2	-5.02674	1.52117e-06	0.0011648
A_12_P107786	NM_062423	T05A7.6	-5.0225	2.31601e-06	0.00146257
A_12_P140317	NM_068288	E03H12.5	-5.02197	1.98351e-05	0.00443114
A_12_P134095	NM_001047236	col-46	-5.01671	6.77297e-05	0.00948445
A_12_P140977	NM_062497	msp-31	-5.01176	3.80061e-05	0.00651776
A_12_P114973	NM_070195	Y38H8A.3	-5.00309	8.0183e-06	0.00272748
A_12_P117170	NM_066269	fbn-1	-5.00064	2.59823e-08	0.000125516
A_12_P175122	NM_076216	T27A10.6	-4.99633	6.21775e-06	0.00238951
A_12_P112312	NM_062742	msp-63	-4.99292	0.000111595	0.0132769
A_12_P108385	NM_060521	nhr-259	-4.99108	1.46436e-08	0.000100803
A_12_P118546	NM_075576	grd-2	-4.99013	1.30628e-06	0.00106386
A_12_P113163	NM_171197	C18H2.5	-4.98556	2.2396e-06	0.00143824
A_12_P172823	NM_066662	C38C10.3	-4.98173	5.49091e-06	0.00225668
A_12_P179008	NM_076612	ptr-4	-4.98172	1.67426e-07	0.000313685
A_12_P145716	NM_069060	mpst-6	-4.97503	4.36352e-05	0.0071171
A_12_P109906	NM_070033	C36H8.1	-4.973	5.71116e-06	0.00229789
A_12_P101839	NM_062130	nep-9	-4.96886	1.07045e-06	0.000948324
A_12_P138114	NM_061906	D2062.6	-4.96608	0.000245253	0.0232462
A_12_P101078	NM_068436	C39H7.1	-4.96604	9.65486e-06	0.00301043
A_12_P140319	NM_068288	E03H12.5	-4.96538	3.13608e-05	0.00579067
A_12_P101524	NM_064020	sqt-1	-4.96289	4.65979e-05	0.0074204
A_12_P115263	NM_076612	ptr-4	-4.96248	2.50705e-07	0.000386128
A_12_P148233	NM_001083173	H38K22.7	-4.96161	1.11144e-05	0.00324238
A_12_P107251	NM_060758	C54C8.4	-4.96107	4.34995e-05	0.00710283
A_12_P117302	NM_065631	F26F4.2	-4.95729	2.36312e-06	0.00146713
A_12_P111800	NM_069341	msp-78	-4.95545	0.000117073	0.0137329
A_12_P113895	NM_065798	F56D2.3	-4.95388	2.15482e-06	0.00141388
A_12_P172717	NM_066817	C05B5.2	-4.95012	3.21076e-05	0.00584334
A_12_P111189	NM_062505	ZK546.3	-4.94901	6.54744e-05	0.00928462
A_12_P154970	NM_001028368	Y59E9AL.8	-4.94891	3.82226e-07	0.000511864
A_12_P179005	NM_076612	ptr-4	-4.94564	1.19972e-07	0.000260077
A_12_P103413	NM_062490	msp-32	-4.93424	6.13338e-05	0.00888695
A_12_P107821	NM_001026708	ZK849.6	-4.93411	1.2418e-05	0.00343834
A_12_P113943	NM_059419	C10G11.1	-4.92933	1.09129e-05	0.00321709
A_12_P142110	NM_001083195	nspd-6	-4.92298	6.86839e-06	0.00251652
A_12_P108684	NM_074336	T09F5.1	-4.91992	3.00611e-05	0.00564635
A_12_P111612	NM_065673	C45G9.9	-4.91589	4.9977e-06	0.00215729
A_12_P169823	NM_001038257	C02F5.14	-4.90577	8.59247e-07	0.000834034
A_12_P146151	NM_001026472	T28B8.6	-4.90573	8.18818e-06	0.00276017
A_12_P106811	NM_063116	C30G12.4	-4.90357	3.90303e-06	0.00191911
A_12_P138113	NM_061906	D2062.6	-4.90308	0.000359093	0.0307506
A_12_P118027	NM_064652	C09F9.2	-4.89931	2.34138e-08	0.000125516
A_12_P138110	NM_061906	D2062.6	-4.8967	0.00015163	0.0163991
A_12_P119622	NM_069815	T22B3.3	-4.8964	9.83148e-06	0.00302204
A_12_P120237	NM_068404	ZK616.1	-4.89542	4.57979e-06	0.0020683
A_12_P132921	NM_059426	C48E7.7	-4.88765	2.46986e-05	0.0050239
A_12_P140976	NM_062497	msp-31	-4.88299	4.47408e-05	0.00723627
A_12_P109608	NM_064229	Y57A10B.7	-4.88259	3.24015e-06	0.00176088
A_12_P118047	NM_074288	T01C3.5	-4.88164	3.24839e-06	0.00176292
A_12_P105005	NM_063958	R03D7.8	-4.87883	1.88358e-05	0.00431357
A_12_P138111	NM_061906	D2062.6	-4.87788	0.000255333	0.0239222
A_12_P103236	NM_061906	D2062.6	-4.87555	0.000183523	0.018869
A_12_P107990	NM_060001	T08G11.2	-4.86606	5.75532e-06	0.00230143
A_12_P107142	NM_075470	spe-19	-4.86598	5.77153e-06	0.00230143
A_12_P179007	NM_076612	ptr-4	-4.86591	1.69441e-07	0.000313685
A_12_P108156	NM_061986	Y110A2AL.3	-4.86211	4.41504e-07	0.000553467
A_12_P151805	NM_064652	C09F9.2	-4.85936	6.10783e-08	0.00019015
A_12_P106325	NM_062886	F58F12.2	-4.85783	2.84123e-05	0.00548906
A_12_P132880	NM_060518	nhr-74	-4.8558	7.73938e-07	0.000776659
A_12_P137607	NM_063116	C30G12.4	-4.85116	3.37213e-05	0.00603071
A_12_P118740	NM_062487	msp-33	-4.84689	6.68791e-05	0.00941574
A_12_P118068	NM_069379	sss-1	-4.84154	0.000212978	0.0210815
A_12_P140978	NM_062497	msp-31	-4.84067	3.56824e-05	0.00626998
A_12_P120358	NM_059168	spe-11	-4.83999	1.07432e-05	0.00318304
A_12_P116392	NM_069437	C04G2.9	-4.83996	2.13795e-05	0.00461684
A_12_P102879	NM_062470	nspd-4	-4.83961	1.32379e-05	0.00355282
A_12_P139805	NM_059398	T08B2.12	-4.83898	1.80136e-05	0.00423492
A_12_P148230	NM_001083173	H38K22.7	-4.83658	2.20808e-05	0.00470355
A_12_P135062	NM_001025966	BE10.5	-4.82955	9.2371e-05	0.0116055
A_12_P118767	NM_064325	Y46G5A.22	-4.8295	1.86271e-05	0.00429709
A_12_P113797	NM_062088	C17F4.2	-4.82445	5.13061e-05	0.00786376
A_12_P109404	NM_072758	F38E1.3	-4.81483	1.68475e-06	0.00122247
A_12_P113721	NM_066734	C15H7.3	-4.81328	2.63697e-06	0.00157967
A_12_P115644	NM_075369	Y43F8A.2	-4.81295	7.19089e-06	0.00258618
A_12_P109027	NM_068141	W03B1.3	-4.8065	4.14961e-05	0.00690795
A_12_P106640	NM_059398	T08B2.12	-4.80142	1.69694e-05	0.00408818
A_12_P102640	NM_070963	R09A1.3	-4.80085	1.37908e-07	0.000280082
A_12_P108871	NM_058351	lpr-1	-4.79983	4.26713e-07	0.000542343
A_12_P114120	NM_070578	Y51H4A.22	-4.79859	9.90076e-06	0.00302977
A_12_P138868	NM_066662	C38C10.3	-4.79803	3.96106e-06	0.00193169
A_12_P108580	NM_070883	F31F4.11	-4.79624	1.95366e-05	0.00439294
A_12_P113246	NM_060305	dlc-6	-4.79464	1.05829e-05	0.00314342
A_12_P159716	NM_070033	C36H8.1	-4.79386	7.12945e-06	0.00257352
A_12_P174827	NM_001047500	K08E7.5	-4.79356	9.97971e-06	0.00304523
A_12_P101496	NM_063761	ZK892.3	-4.79315	1.04138e-05	0.00311203
A_12_P140975	NM_062497	msp-31	-4.78977	5.57482e-05	0.00831718
A_12_P170197	NM_059400	C48E7.7	-4.78685	1.54379e-05	0.00387306
A_12_P110754	NM_001047262	C01F1.3	-4.7858	1.08987e-08	9.40655e-05
A_12_P177019	NM_068371	ZK354.6	-4.77846	1.02928e-05	0.00309713
A_12_P104450	NM_070622	Y116A8C.23	-4.77662	8.94097e-06	0.00287867
A_12_P108430	NM_067068	Y47D3B.4	-4.77147	1.54595e-09	4.66609e-05
A_12_P159715	NM_070033	C36H8.1	-4.76586	8.30277e-06	0.00277732
A_12_P138600	NM_058598	C55C2.3	-4.75008	6.56444e-06	0.00246815
A_12_P102456	NM_001028574	D1054.9	-4.74762	1.46623e-06	0.00114101
A_12_P112613	NM_001027648	Y111B2A.27	-4.74708	4.7473e-06	0.00209097
A_12_P101835	NM_059843	ZK265.3	-4.74696	5.19375e-05	0.00792155
A_12_P138165	NM_001038263	C29E4.14	-4.73754	0.000116369	0.013679
A_12_P130425	NM_073044	nas-3	-4.73024	5.71304e-05	0.00843962
A_12_P108042	NM_059801	C54G4.3	-4.72754	3.68245e-06	0.00186603
A_12_P107282	NM_059073	F21F3.2	-4.72499	7.91057e-06	0.00271289
A_12_P101087	NM_064939	cdh-12	-4.72468	1.6144e-05	0.00396898
A_12_P119154	NM_072709	F20D6.1	-4.72155	6.71514e-06	0.00249986
A_12_P119573	NM_001029579	K02E10.4	-4.71755	9.54415e-06	0.00298397
A_12_P174828	NM_001047500	K08E7.5	-4.71392	2.25467e-06	0.0014398
A_12_P142051	NM_073783	cky-1	-4.71112	1.24782e-06	0.00103731
A_12_P119955	NM_068640	C17H12.3	-4.70843	3.43463e-06	0.0018041
A_12_P148231	NM_001083173	H38K22.7	-4.70707	2.98159e-05	0.00563646
A_12_P108671	NM_078025	sym-1	-4.70685	1.52414e-07	0.000293154
A_12_P132760	NM_060353	F59C6.3	-4.70593	2.75208e-06	0.00161654
A_12_P102677	NM_069637	Y69E1A.1	-4.70151	3.41537e-05	0.00607483
A_12_P138112	NM_061906	D2062.6	-4.7012	0.000341549	0.029702
A_12_P146750	NM_064939	cdh-12	-4.69953	9.90324e-05	0.0121469
A_12_P112658	NM_062660	C17C3.9	-4.69898	2.87066e-06	0.00164195
A_12_P108873	NM_170916	B0379.7	-4.6935	3.57738e-05	0.00628211
A_12_P106180	NM_069378	F32B6.4	-4.68477	5.49251e-06	0.00225668
A_12_P177069	NM_059801	C54G4.3	-4.67453	5.33811e-06	0.00222824
A_12_P170948	NM_073192	R04B5.11	-4.67365	8.60401e-06	0.00282635
A_12_P162998	NM_074118	T16A9.5	-4.66909	2.97772e-05	0.00563646
A_12_P177864	NM_069576	R102.3	-4.66811	8.68205e-07	0.000839069
A_12_P113052	NM_068127	F36A4.2	-4.66805	1.17692e-05	0.00332945
A_12_P112138	NM_069425	W01B6.5	-4.66543	0.000101223	0.0123401
A_12_P108132	NM_059898	D1081.5	-4.66417	1.83881e-05	0.00427286
A_12_P118320	NM_074095	D1086.3	-4.65317	1.42779e-05	0.00371717
A_12_P108798	NM_070032	T23F6.5	-4.65166	0.000351466	0.0302958
A_12_P104052	NM_059410	C10G11.8	-4.65048	2.48465e-05	0.00503572
A_12_P112516	NM_067040	tbx-34	-4.65006	2.18058e-06	0.0014251
A_12_P135422	NM_065809	C05D2.3	-4.64787	2.56052e-06	0.00155284
A_12_P135064	NM_001025966	BE10.5	-4.64753	0.000244605	0.0232097
A_12_P166216	NM_073570	acl-10	-4.64698	1.12114e-06	0.000974763
A_12_P118663	NM_069011	F17E9.5	-4.64502	2.05135e-05	0.00450924
A_12_P136913	NM_001027327	ZK1248.20	-4.64214	8.56553e-05	0.0110629
A_12_P131206	NM_001047693	T02B11.9	-4.64087	3.01605e-05	0.00565419
A_12_P104381	NM_001028622	F13A7.12	-4.63823	4.45869e-05	0.00721818
A_12_P137530	NM_001276812	Y67D8B.3	-4.63809	5.40264e-06	0.00224406
A_12_P114065	NM_065809	C05D2.3	-4.63717	2.37344e-05	0.00490238
A_12_P134382	NM_001026655	Y71G12B.33	-4.634	8.615e-06	0.00282635
A_12_P112365	NM_064709	Y53F4B.24	-4.63175	3.19187e-06	0.00174564
A_12_P154182	NM_077416	F47B10.5	-4.63074	9.79591e-07	0.000898054
A_12_P105014	NM_001029110	sfxn-1.3	-4.62965	3.67061e-06	0.0018632
A_12_P150090	NM_058875	F47B3.7	-4.6291	4.18131e-05	0.00695187
A_12_P168004	NM_070499	Y105C5B.11	-4.62858	7.37327e-07	0.000756407
A_12_P134383	NM_001026655	Y71G12B.33	-4.62553	3.00349e-05	0.00564635
A_12_P134226	NM_001027292	Y53C12A.8	-4.62486	8.85607e-07	0.000842223
A_12_P176191	NM_060144	K07A1.5	-4.62457	4.19641e-05	0.00696517
A_12_P112548	NM_067289	Y39E4A.1	-4.62344	3.46386e-05	0.00614158
A_12_P116718	NM_073115	F58E6.5	-4.62097	0.0003106	0.0275853
A_12_P177070	NM_059801	C54G4.3	-4.61876	5.64711e-06	0.00228196
A_12_P157765	NM_074300	C25D7.1	-4.61571	1.32587e-06	0.0010771
A_12_P101460	NM_075575	ttr-12	-4.61508	7.78462e-06	0.00270484
A_12_P156416	NM_001083137	K12C11.5	-4.61182	0.00043218	0.0350945
A_12_P154183	NM_077416	F47B10.5	-4.60313	2.05927e-06	0.0013695
A_12_P101393	NM_068373	ZK354.7	-4.60224	4.49199e-06	0.00205636
A_12_P110898	NM_058871	F47B3.4	-4.60084	7.62851e-07	0.000771453
A_12_P108626	NM_066572	ZK637.12	-4.60041	1.00536e-05	0.00305323
A_12_P116798	NM_067026	W09D6.4	-4.5967	9.81011e-06	0.00302026
A_12_P146751	NM_064939	cdh-12	-4.59618	2.27479e-05	0.00478077
A_12_P172507	NM_065545	clec-153	-4.59403	9.00624e-06	0.00288005
A_12_P170950	NM_073192	R04B5.11	-4.59394	5.87127e-06	0.0023156
A_12_P154180	NM_077416	F47B10.5	-4.59194	1.46852e-06	0.00114101
A_12_P154405	NM_001083172	H38K22.6	-4.59179	6.1271e-06	0.00236394
A_12_P120352	NM_070543	K03D3.2	-4.5914	0.000263873	0.0244943
A_12_P112814	NM_070235	C08F11.10	-4.5886	2.32209e-06	0.00146257
A_12_P115786	NM_059320	B0207.11	-4.58845	5.57844e-06	0.00227725
A_12_P154228	NM_171204	dpf-6	-4.58757	9.8909e-05	0.0121393
A_12_P104937	NM_062570	C34F11.5	-4.58327	4.95597e-06	0.00214636
A_12_P149174	NM_001038327	F56D6.14	-4.58258	4.37184e-06	0.00203934
A_12_P115533	NM_076094	F53B3.2	-4.58	8.8864e-07	0.000842223
A_12_P117035	NM_074534	T26E4.5	-4.57798	2.87204e-05	0.005516
A_12_P101598	NM_059797	H05L14.1	-4.57776	2.13908e-05	0.00461684
A_12_P100872	NM_063460	atf-2	-4.57714	0.000191461	0.0194522
A_12_P142440	NM_070603	Y116A8C.4	-4.57712	4.33735e-06	0.00203087
A_12_P154184	NM_077416	F47B10.5	-4.57439	1.47879e-06	0.00114672
A_12_P115829	NM_059408	oac-9	-4.57066	2.88955e-06	0.00165034
A_12_P148234	NM_001083173	H38K22.7	-4.56948	7.38583e-06	0.00263217
A_12_P120127	NM_001129601	ZC250.5	-4.56946	1.07309e-06	0.000948324
A_12_P101172	NM_061297	clec-117	-4.56933	1.73278e-06	0.00123394
A_12_P107163	NM_077027	spp-13	-4.56898	9.11045e-06	0.00290681
A_12_P138168	NM_001038263	C29E4.14	-4.56685	7.23517e-05	0.00986283
A_12_P178225	NM_073570	acl-10	-4.5637	4.64633e-07	0.000567946
A_12_P149170	NM_001038327	F56D6.14	-4.56346	4.41797e-06	0.00204664
A_12_P108953	NM_067268	Y37D8A.3	-4.56234	6.59087e-08	0.000196818
A_12_P145545	NM_001129094	ZK39.10	-4.56156	8.78402e-06	0.00285554
A_12_P172413	NM_062130	nep-9	-4.5558	1.91326e-06	0.00131474
A_12_P140996	NM_060998	W04A4.2	-4.55426	0.000113833	0.013473
A_12_P112251	NM_059986	F36A2.11	-4.55379	1.1661e-05	0.00332114
A_12_P104374	NM_001029672	grd-1	-4.5535	2.67805e-06	0.00158972
A_12_P112843	NM_074300	C25D7.1	-4.55271	3.47871e-06	0.0018151
A_12_P154181	NM_077416	F47B10.5	-4.55062	1.25438e-06	0.00104056
A_12_P115431	NM_001027315	Y62F5A.10	-4.54992	1.96955e-06	0.00133703
A_12_P131076	NM_069426	W01B6.6	-4.54602	3.40161e-06	0.00180012
A_12_P106015	NM_060144	C04F12.6	-4.5425	1.13896e-05	0.00328018
A_12_P149173	NM_001038327	F56D6.14	-4.54194	1.16825e-05	0.00332114
A_12_P109178	NM_066110	F57B9.8	-4.53953	2.50924e-06	0.00152882
A_12_P148080	NM_001038325	F56D6.12	-4.53823	5.92869e-05	0.00868336
A_12_P138079	NM_073355	D1054.9	-4.53383	2.14305e-06	0.00140851
A_12_P110273	NM_059354	ZK484.5	-4.53288	4.52773e-06	0.00206392
A_12_P130423	NM_073044	nas-3	-4.53035	1.88784e-07	0.000333667
A_12_P145546	NM_001129094	ZK39.10	-4.52859	1.50708e-05	0.00381757
A_12_P111561	NM_060912	ZK1225.1	-4.52797	6.9613e-06	0.00253424
A_12_P117120	NM_060158	T05F1.5	-4.52233	2.20074e-06	0.00142966
A_12_P108707	NM_001129386	C25D7.16	-4.52151	2.6981e-06	0.00159679
A_12_P102647	NM_073716	C54D10.4	-4.51082	3.62798e-06	0.00185537
A_12_P115147	NM_065581	B0393.5	-4.50732	4.39382e-05	0.00714769
A_12_P130421	NM_073044	nas-3	-4.50695	4.00398e-06	0.00193784
A_12_P141343	NM_001028185	T04B2.8	-4.50045	3.05678e-06	0.00170645
A_12_P101926	NM_076453	ZC449.2	-4.4994	2.11846e-05	0.00459752
A_12_P133069	NM_058817	C32E8.4	-4.49897	1.85165e-05	0.00428593
A_12_P138155	NM_070250	C47A4.5	-4.49857	5.78508e-06	0.00230449
A_12_P133066	NM_058817	C32E8.4	-4.49772	2.39841e-05	0.00493744
A_12_P148070	NM_059297	F33D11.1	-4.49661	1.72181e-05	0.00412019
A_12_P111446	NM_065392	F37A8.1	-4.49443	6.97584e-06	0.00253674
A_12_P156417	NM_001083137	K12C11.5	-4.49279	6.67524e-05	0.0094148
A_12_P114351	NM_066658	K04H4.2	-4.49251	5.06834e-06	0.00216869
A_12_P130422	NM_073044	nas-3	-4.49017	1.37377e-07	0.000280082
A_12_P103383	NM_070030	T23F6.3	-4.48825	1.68411e-05	0.00406874
A_12_P135976	NM_074271	H12D21.5	-4.48752	9.66796e-06	0.00301043
A_12_P103862	NM_073570	acl-10	-4.48391	6.83022e-07	0.000728263
A_12_P108249	NM_075445	Y116F11B.8	-4.48315	1.57832e-06	0.00117898
A_12_P153820	NM_070358	T27E7.1	-4.48109	1.10989e-05	0.00324027
A_12_P162408	NM_067061	T28D6.3	-4.48066	4.99591e-07	0.000595827
A_12_P113530	NM_068710	ZC477.2	-4.47919	3.10173e-05	0.00575706
A_12_P101367	NM_060532	K08C9.5	-4.47433	1.89225e-05	0.00432429
A_12_P160036	NM_068330	C24D10.2	-4.47419	5.24217e-06	0.00220934
A_12_P107451	NM_069393	C47E12.11	-4.47349	9.68246e-06	0.00301043
A_12_P118487	NM_062135	F18A12.2	-4.47298	5.15246e-06	0.00218538
A_12_P114339	NM_065148	H14E04.1	-4.47223	8.73369e-07	0.000839922
A_12_P154226	NM_171204	dpf-6	-4.47194	2.18793e-05	0.00468097
A_12_P103276	NM_068358	F36H12.8	-4.47111	3.23621e-06	0.00176088
A_12_P160037	NM_068330	C24D10.2	-4.46941	3.85563e-06	0.00190296
A_12_P130292	NM_076196	wrt-6	-4.46932	0.000691929	0.0499143
A_12_P116840	NM_063652	F35H8.1	-4.4691	4.81695e-06	0.00210708
A_12_P108209	NM_074737	F13A7.7	-4.46567	7.16562e-05	0.00980338
A_12_P141341	NM_001028185	T04B2.8	-4.46257	1.61964e-06	0.00120133
A_12_P104925	NM_059966	gska-3	-4.4621	1.4944e-05	0.00381251
A_12_P158827	NM_068860	F33D4.6	-4.46132	0.000162917	0.0172583
A_12_P136912	NM_001027327	ZK1248.20	-4.46093	2.24932e-05	0.00476039
A_12_P140036	NM_070313	R05A10.8	-4.45881	1.28664e-06	0.00105616
A_12_P100482	NM_065724	ZC395.4	-4.45873	1.4209e-05	0.00371602
A_12_P106465	NM_060793	T07D10.3	-4.45647	5.26916e-05	0.00800394
A_12_P158826	NM_068860	F33D4.6	-4.45489	3.21937e-05	0.00585629
A_12_P138078	NM_073355	D1054.9	-4.45152	5.96066e-07	0.000670147
A_12_P115917	NM_058987	Y119C1B.1	-4.45087	6.07162e-06	0.00235313
A_12_P141796	NM_068330	C24D10.2	-4.44853	5.47665e-06	0.00225562
A_12_P111252	NM_062468	C33F10.1	-4.44401	5.05861e-05	0.00780639
A_12_P176189	NM_060144	K07A1.5	-4.44083	3.43564e-05	0.00610534
A_12_P168580	NM_059843	ZK265.3	-4.44044	7.53723e-05	0.0101351
A_12_P116968	NM_069757	F22B3.7	-4.43826	1.60827e-05	0.00396238
A_12_P114839	NM_001027129	ubxn-5	-4.43562	0.000102789	0.0124761
A_12_P110185	NM_060919	ZK1053.2	-4.43549	9.72742e-06	0.00301723
A_12_P102409	NM_068358	F36H12.8	-4.4311	2.93385e-06	0.00166594
A_12_P139185	NM_068147	W03B1.9	-4.42947	5.89558e-06	0.0023156
A_12_P115628	NM_067112	Y41C4A.7	-4.42837	9.20618e-06	0.00291386
A_12_P115783	NM_069335	C28D4.5	-4.42598	1.12494e-06	0.000974763
A_12_P106947	NM_068486	H04M03.1	-4.42427	9.51884e-06	0.00297843
A_12_P106434	NM_068344	Y59E9AL.6	-4.42383	4.014e-05	0.00675964
A_12_P101724	NM_061779	T16A1.2	-4.4161	1.8644e-05	0.00429709
A_12_P141798	NM_068330	C24D10.2	-4.41593	1.03943e-05	0.00311203
A_12_P105236	NM_001129406	C45B11.6	-4.41351	6.79414e-07	0.00072639
A_12_P133067	NM_058817	C32E8.4	-4.41326	2.71735e-05	0.00530986
A_12_P138076	NM_073355	D1054.9	-4.41234	3.57617e-07	0.000482356
A_12_P101048	NM_059451	F37E3.3	-4.41123	0.000138823	0.0154133
A_12_P118334	NM_070135	F58D2.2	-4.40657	3.10759e-06	0.0017198
A_12_P116176	NM_068463	C31H1.5	-4.40107	3.14244e-05	0.0057997
A_12_P113277	NM_064551	K09E4.1	-4.40036	9.19419e-06	0.00291386
A_12_P170947	NM_073192	R04B5.11	-4.40016	5.47845e-06	0.00225562
A_12_P132653	NM_070371	F13G11.2	-4.39987	4.24242e-06	0.00199834
A_12_P115303	NM_070026	C27D8.2	-4.3949	3.09853e-06	0.00171721
A_12_P166215	NM_073570	acl-10	-4.39396	6.16306e-07	0.000688954
A_12_P101608	NM_062132	nep-8	-4.39239	1.64786e-06	0.001213
A_12_P148074	NM_059297	F33D11.1	-4.3918	1.04419e-05	0.00311806
A_12_P160039	NM_068330	C24D10.2	-4.39042	4.58576e-06	0.0020683
A_12_P110913	NM_074731	W08G11.1	-4.38889	9.19406e-05	0.0115663
A_12_P107726	NM_063333	M110.7	-4.38763	0.000425065	0.0346746
A_12_P109261	NM_061765	F07E5.4	-4.38515	3.44114e-05	0.00610959
A_12_P137397	NM_001047557	Y38H8A.2	-4.38477	8.93277e-05	0.0113357
A_12_P102145	NM_063573	C01G6.2	-4.38465	1.80806e-05	0.0042474
A_12_P141940	NM_060099	C17E4.1	-4.38407	3.0034e-05	0.00564635
A_12_P135700	NM_068358	F36H12.8	-4.38357	4.00162e-06	0.00193784
A_12_P115907	NM_068723	C34D4.3	-4.38355	0.000117247	0.013745
A_12_P167915	NM_073281	snf-10	-4.37843	4.54995e-06	0.0020683
A_12_P139951	NM_064045	klp-17	-4.37511	1.10252e-05	0.00323319
A_12_P138075	NM_073355	D1054.9	-4.37472	1.08025e-06	0.000950291
A_12_P116461	NM_070027	C27D8.1	-4.37467	1.49949e-06	0.00115704
A_12_P106950	NM_058543	dct-9	-4.37251	5.33406e-05	0.00806844
A_12_P149171	NM_001038327	F56D6.14	-4.37116	4.9498e-06	0.00214605
A_12_P133065	NM_058817	C32E8.4	-4.37057	4.227e-05	0.00699229
A_12_P100865	NM_001029402	F14F3.4	-4.36968	0.000568947	0.0430385
A_12_P116646	NM_061406	Y39F10A.3	-4.36881	7.07833e-06	0.00256214
A_12_P101683	NM_065419	C03C10.2	-4.36698	1.98705e-06	0.00133964
A_12_P109431	NM_061771	F07E5.8	-4.36155	8.92177e-06	0.00287867
A_12_P151006	NM_060137	F42H11.1	-4.36129	1.59353e-05	0.00394736
A_12_P151985	NM_001129051	T27C10.8	-4.35534	1.18439e-05	0.00334336
A_12_P105009	NM_069576	R102.3	-4.3551	6.31817e-07	0.000696375
A_12_P106129	NM_062157	Y49F6B.8	-4.35155	1.27336e-05	0.00347918
A_12_P107458	NM_001047497	clec-172	-4.3513	5.50572e-06	0.00225973
A_12_P118297	NM_060921	ZK1053.6	-4.35104	1.70308e-06	0.00122989
A_12_P133068	NM_058817	C32E8.4	-4.34955	3.19004e-05	0.0058354
A_12_P116091	NM_066735	C15H7.4	-4.34951	6.76943e-06	0.00250109
A_12_P144555	NM_069639	Y69E1A.3	-4.34832	2.08297e-05	0.00455511
A_12_P154408	NM_001083172	H38K22.6	-4.34767	0.00012868	0.0145717
A_12_P147433	NM_066658	K04H4.2	-4.34725	7.21421e-07	0.000751172
A_12_P109740	NM_069488	R09E10.6	-4.34681	1.70039e-05	0.00408818
A_12_P117027	NM_062869	C32D5.4	-4.3465	9.51055e-06	0.00297822
A_12_P107525	NM_171205	dpf-6	-4.34112	8.96524e-06	0.00287867
A_12_P109782	NM_062980	fis-1	-4.33832	3.13106e-05	0.00578869
A_12_P135975	NM_074271	H12D21.5	-4.33683	0.000448501	0.0360912
A_12_P112618	NM_068352	Y59E9AR.2	-4.33657	1.84981e-06	0.00128464
A_12_P107431	NM_066790	tag-76	-4.33572	4.11162e-06	0.00196445
A_12_P115880	NM_065393	F37A8.2	-4.33372	1.02131e-05	0.00308088
A_12_P104139	NM_060523	ZK1025.2	-4.32923	9.24616e-05	0.0116132
A_12_P147431	NM_066658	K04H4.2	-4.327	8.95138e-06	0.00287867
A_12_P169824	NM_001038257	C02F5.14	-4.32548	0.000374712	0.0317105
A_12_P111187	NM_060046	ZK858.2	-4.32463	0.000210355	0.0208851
A_12_P152961	NM_001047237	Y37E3.19	-4.3246	0.000229737	0.0221798
A_12_P132761	NM_060353	F59C6.3	-4.32459	3.54944e-06	0.00183422
A_12_P155115	NM_070221	Y45F10B.3	-4.32428	2.84034e-06	0.00163331
A_12_P114089	NM_059619	K10D3.4	-4.32207	1.3578e-06	0.00109174
A_12_P169354	NM_069409	F44D12.4	-4.32174	5.47294e-05	0.00820576
A_12_P154227	NM_171204	dpf-6	-4.31281	1.43852e-05	0.00373553
A_12_P113617	NM_074233	R08A2.1	-4.31192	5.4822e-05	0.00821336
A_12_P100214	NM_061296	B0432.11	-4.30895	6.87098e-06	0.00251652
A_12_P111191	NM_073695	F23H12.5	-4.30443	3.91516e-06	0.00192267
A_12_P141380	NM_074535	T26E4.4	-4.30253	5.13816e-10	3.36014e-05
A_12_P102469	NM_001027366	ZK945.6	-4.30234	7.04631e-06	0.00255526
A_12_P166055	NM_069575	R102.8	-4.30202	2.57889e-05	0.00514435
A_12_P103747	NM_064325	Y46G5A.22	-4.29835	1.94106e-05	0.00438528
A_12_P149172	NM_001038327	F56D6.14	-4.29684	7.99948e-06	0.00272748
A_12_P117577	NM_063796	cdc-25.4	-4.29662	1.14711e-05	0.00329259
A_12_P140995	NM_060998	W04A4.2	-4.29588	0.000386953	0.0324217
A_12_P111343	NM_068610	F38A5.6	-4.29481	2.54396e-06	0.00154518
A_12_P149081	NM_001128986	F21C3.7	-4.29453	3.75931e-05	0.00647642
A_12_P100080	NM_069432	C04G2.5	-4.29222	8.35846e-06	0.00278409
A_12_P103227	NM_060019	F32H2.7	-4.29219	9.99076e-06	0.00304594
A_12_P103328	NM_061907	D2062.5	-4.28962	2.11812e-06	0.00139992
A_12_P110600	NM_001027370	ZK970.8	-4.28884	3.68981e-06	0.00186603
A_12_P105407	NM_063313	T05C12.3	-4.2846	8.32899e-06	0.00278372
A_12_P172412	NM_062130	nep-9	-4.28384	2.37395e-05	0.00490238
A_12_P119142	NM_001047465	C53B4.8	-4.28173	4.26106e-05	0.00703083
A_12_P146911	NM_066574	ZK637.12	-4.28028	2.04003e-05	0.00449694
A_12_P119180	NM_066114	pqn-46	-4.27949	2.49799e-05	0.00505492
A_12_P119861	NM_070825	R11G11.6	-4.2763	0.000330341	0.0289835
A_12_P118620	NM_059295	F33D11.2	-4.275	1.92454e-05	0.00437256
A_12_P112475	NM_066478	ZC21.8	-4.2711	8.61288e-06	0.00282635
A_12_P115759	NM_062262	F54D10.8	-4.27019	0.000183557	0.018869
A_12_P148072	NM_059297	F33D11.1	-4.26939	2.50829e-05	0.0050627
A_12_P116847	NM_064695	Y53F4B.11	-4.26884	6.38634e-06	0.0024287
A_12_P160038	NM_068330	C24D10.2	-4.26715	3.0235e-06	0.0016972
A_12_P146150	NM_001026472	T28B8.6	-4.26333	2.61198e-05	0.00517613
A_12_P148073	NM_059297	F33D11.1	-4.259	1.7149e-05	0.00411046
A_12_P168194	NM_070797	B0554.4	-4.25897	0.000589503	0.0441508
A_12_P120066	NM_062161	col-71	-4.25551	3.63985e-05	0.00633904
A_12_P166275	NM_070094	F49E11.2	-4.25421	2.83799e-05	0.0054855
A_12_P138077	NM_073355	D1054.9	-4.25381	1.48365e-06	0.00114822
A_12_P147202	NM_001129722	ZK662.6	-4.25321	1.03818e-06	0.000931206
A_12_P102167	NM_063267	ZK669.2	-4.25316	2.81049e-08	0.000125684
A_12_P139315	NM_065520	M88.3	-4.25284	6.24491e-06	0.0023976
A_12_P116281	NM_070371	F13G11.2	-4.25249	5.11261e-06	0.00217296
A_12_P146152	NM_001026472	T28B8.6	-4.25116	3.08525e-05	0.00574187
A_12_P120361	NM_072359	ptr-15	-4.25112	1.26806e-06	0.0010497
A_12_P119404	NM_063387	M05D6.1	-4.25065	8.71891e-06	0.00284143
A_12_P137605	NM_063116	C30G12.4	-4.2501	3.30476e-05	0.00595968
A_12_P141795	NM_068330	C24D10.2	-4.24718	1.31349e-05	0.0035397
A_12_P168405	NM_062554	F58A6.5	-4.24708	0.000138619	0.0153994
A_12_P104958	NM_072120	ZC250.3	-4.24395	1.85149e-05	0.00428593
A_12_P160035	NM_068330	C24D10.2	-4.24081	4.9249e-06	0.00213762
A_12_P136422	NM_061985	Y110A2AL.9	-4.24057	7.04155e-07	0.000740731
A_12_P108082	NM_066657	K04H4.2	-4.24018	8.01216e-07	0.000795891
A_12_P163028	NM_059995	snf-2	-4.23886	2.30129e-05	0.00482356
A_12_P106485	NM_070506	Y105C5B.18	-4.23867	1.3794e-05	0.00363984
A_12_P106502	NM_068750	D2024.1	-4.23772	4.91647e-05	0.00768259
A_12_P107672	NM_068788	B0496.2	-4.23677	2.22456e-05	0.00472311
A_12_P148071	NM_059297	F33D11.1	-4.23562	2.2797e-05	0.00478547
A_12_P115422	NM_078264	F01G12.1	-4.23469	0.00012609	0.0143905
A_12_P106119	NM_068330	C24D10.2	-4.23286	3.13821e-06	0.00172943
A_12_P101238	NM_068314	R13H9.5	-4.22985	8.02864e-06	0.00272748
A_12_P137398	NM_001047557	Y38H8A.2	-4.22961	8.87557e-05	0.0112923
A_12_P108710	NM_069444	K08F4.5	-4.22575	4.56035e-06	0.0020683
A_12_P107263	NM_064633	C01G12.8	-4.2252	9.75414e-06	0.00302026
A_12_P179225	NM_068461	C31H1.2	-4.22374	1.2624e-05	0.00346768
A_12_P103149	NM_063233	C06A8.6	-4.22114	7.80473e-06	0.00270484
A_12_P109115	NM_060680	C15C6.2	-4.21891	4.62855e-05	0.00738263
A_12_P113225	NM_070649	C52D10.1	-4.21555	5.87535e-06	0.0023156
A_12_P118144	NM_074118	T16A9.5	-4.21421	2.62512e-05	0.00519956
A_12_P102874	NM_069533	F01D4.3	-4.21406	0.000177273	0.0183966
A_12_P107469	NM_001026225	F18C12.4	-4.20875	8.19942e-05	0.0107528
A_12_P177145	NM_060913	ZK1225.2	-4.20851	0.000262094	0.0244042
A_12_P148232	NM_001083173	H38K22.7	-4.20808	6.74615e-05	0.00946057
A_12_P119246	NM_069333	C28D4.7	-4.20789	0.000196617	0.0198272
A_12_P109590	NM_076505	C26B9.2	-4.20465	2.33654e-05	0.00486625
A_12_P103962	NM_067505	F18F11.4	-4.20434	2.73005e-05	0.00533189
A_12_P147434	NM_066658	K04H4.2	-4.20331	3.30909e-07	0.000467051
A_12_P108958	NM_059418	C10G11.10	-4.20317	5.7214e-05	0.0084421
A_12_P105784	NM_069999	F53B2.5	-4.20215	6.76173e-06	0.00250109
A_12_P140035	NM_070313	R05A10.8	-4.20122	4.65323e-10	3.36014e-05
A_12_P154409	NM_001083172	H38K22.6	-4.19902	1.27966e-05	0.00348192
A_12_P101088	NM_068908	kin-26	-4.19873	5.40462e-06	0.00224406
A_12_P108751	NM_001028348	Y57G11B.7	-4.19849	3.39431e-06	0.00180012
A_12_P155726	NM_060518	nhr-74	-4.19845	6.67138e-08	0.000196818
A_12_P141799	NM_068330	C24D10.2	-4.19597	1.26415e-05	0.00346868
A_12_P111870	NM_065545	clec-153	-4.19436	7.44224e-05	0.0100418
A_12_P170438	NM_069335	C28D4.5	-4.19416	4.50922e-05	0.00726614
A_12_P102936	NM_066079	K07E12.2	-4.19177	0.000500645	0.0392724
A_12_P110869	NM_060518	nhr-74	-4.1911	6.84887e-08	0.000200547
A_12_P174822	NM_001047500	K08E7.5	-4.1906	4.98434e-06	0.00215389
A_12_P155050	NM_060530	NHR-113	-4.19014	4.9108e-05	0.0076768
A_12_P107497	NM_059679	F07A5.2	-4.19007	1.79189e-05	0.0042304
A_12_P102281	NM_076585	F49E10.2	-4.18902	0.000176384	0.0183189
A_12_P106081	NM_061310	cbn-1	-4.18593	0.000263969	0.0244974
A_12_P173342	NM_069999	F53B2.5	-4.18522	8.19715e-06	0.00276082
A_12_P106039	NM_063188	F35D2.2	-4.18475	0.000136843	0.0152582
A_12_P120389	NM_070357	Y57G11A.2	-4.18396	3.09549e-05	0.00575092
A_12_P111450	NM_059297	F33D11.1	-4.18379	1.81927e-05	0.00425276
A_12_P173937	NM_061406	Y39F10A.3	-4.18331	1.7166e-06	0.00122989
A_12_P147430	NM_066658	K04H4.2	-4.18064	2.17552e-07	0.000357886
A_12_P108762	NM_060915	ZK1225.4	-4.18017	1.3872e-05	0.0036506
A_12_P112499	NM_069424	W01B6.4	-4.17898	0.000138444	0.0153887
A_12_P114166	NM_068371	ZK354.6	-4.17773	8.65327e-06	0.00283296
A_12_P173208	NM_067041	wht-8	-4.17727	2.60176e-05	0.00517156
A_12_P154225	NM_171204	dpf-6	-4.17583	7.88401e-06	0.00271289
A_12_P117144	NM_059029	W09C3.2	-4.17109	3.15142e-05	0.00580807
A_12_P176780	NM_068344	Y59E9AL.6	-4.17037	2.64598e-05	0.00521724
A_12_P108096	NM_077806	cyp-14A4	-4.16713	3.75087e-06	0.0018756
A_12_P136423	NM_061985	Y110A2AL.9	-4.16587	8.42832e-07	0.000826766
A_12_P102555	NM_063901	D2089.2	-4.16425	0.000334863	0.0292479
A_12_P109914	NM_062475	F11G11.4	-4.15935	4.76251e-06	0.00209097
A_12_P177905	NM_073184	F57A8.6	-4.15801	1.52521e-06	0.0011648
A_12_P176779	NM_068344	Y59E9AL.6	-4.15554	3.44751e-05	0.00611535
A_12_P147201	NM_001129722	ZK662.6	-4.15378	2.41248e-06	0.0014837
A_12_P118118	NM_063457	rol-6	-4.15058	0.000101271	0.0123405
A_12_P111852	NM_067305	F14F7.4	-4.15045	4.3522e-06	0.00203539
A_12_P136424	NM_061985	Y110A2AL.9	-4.14826	9.4084e-07	0.000874792
A_12_P105922	NM_062138	C16C8.18	-4.1446	5.29632e-06	0.00222261
A_12_P102198	NM_066806	K03H1.12	-4.14394	4.16975e-06	0.00197836
A_12_P104351	NM_060691	nhr-265	-4.14128	1.07898e-06	0.000950291
A_12_P134054	NM_070936	K09C6.7	-4.14122	9.12803e-07	0.000859392
A_12_P147200	NM_001129722	ZK662.6	-4.13962	1.21956e-06	0.00102249
A_12_P102466	NM_062992	F31E8.5	-4.13941	9.20594e-06	0.00291386
A_12_P111365	NM_059460	K06A5.2	-4.13911	8.84087e-06	0.00287164
A_12_P103218	NM_070194	Y38H8A.4	-4.13622	3.93451e-06	0.00192614
A_12_P105325	NM_001028791	F53F4.15	-4.13305	4.55734e-05	0.00730171
A_12_P152475	NM_001083230	R09E10.4	-4.13156	2.28499e-05	0.00479194
A_12_P103502	NM_069357	kin-21	-4.13115	0.000450486	0.0362116
A_12_P100586	NM_062348	C16A11.7	-4.12785	5.67423e-05	0.00840795
A_12_P109816	NM_076109	Y41G9A.2	-4.12738	3.44302e-05	0.00611016
A_12_P104620	NM_060224	Y106G6A.4	-4.12463	0.000169771	0.0177874
A_12_P147432	NM_066658	K04H4.2	-4.12286	1.1273e-07	0.000258872
A_12_P111697	NM_068969	B0218.7	-4.1192	2.87977e-05	0.00552272
A_12_P131075	NM_069426	W01B6.6	-4.11817	0.000153116	0.0165079
A_12_P173407	NM_064639	C38C6.5	-4.11763	2.40693e-05	0.00494701
A_12_P105566	NM_063811	F54B3.2	-4.11735	0.000109669	0.0131074
A_12_P114257	NM_071958	Y58A7A.2	-4.1168	5.69661e-07	0.00064977
A_12_P111004	NM_075204	ZK262.4	-4.11504	7.25722e-06	0.00259813
A_12_P136420	NM_061985	Y110A2AL.9	-4.11449	6.22382e-07	0.000693564
A_12_P138776	NM_001129424	D1086.17	-4.1141	5.9653e-06	0.00233131
A_12_P102412	NM_067106	Y41C4A.1	-4.11286	0.000610519	0.0454545
A_12_P137396	NM_001047557	Y38H8A.2	-4.11219	0.000232853	0.0223826
A_12_P137248	NM_001047241	Y53C10A.15	-4.11178	3.90945e-05	0.00663195
A_12_P138775	NM_001129424	D1086.17	-4.10819	2.25342e-06	0.0014398
A_12_P177904	NM_073184	F57A8.6	-4.10548	8.21507e-06	0.00276448
A_12_P101421	NM_060798	H16D19.3	-4.10441	0.000262298	0.024417
A_12_P115430	NM_062643	nep-5	-4.09882	4.41589e-06	0.00204664
A_12_P139950	NM_064045	klp-17	-4.09853	8.54752e-06	0.00282072
A_12_P114819	NM_070499	Y105C5B.11	-4.09388	4.03883e-06	0.00194269
A_12_P118735	NM_067042	Y47D3A.13	-4.09358	2.40855e-05	0.00494701
A_12_P114893	NM_062631	F07F6.1	-4.09341	2.16005e-06	0.00141494
A_12_P141362	NM_001047827	T23E7.6	-4.09278	8.02681e-06	0.00272748
A_12_P135420	NM_065809	C05D2.3	-4.09108	7.33559e-06	0.00261902
A_12_P174829	NM_001047500	K08E7.5	-4.09106	4.23218e-06	0.00199797
A_12_P117618	NM_066511	kin-31	-4.09028	2.75643e-06	0.00161667
A_12_P158828	NM_068860	F33D4.6	-4.08931	0.000142411	0.0156827
A_12_P114160	NM_060485	F46A8.6	-4.08776	3.42461e-06	0.00180366
A_12_P116913	NM_070936	K09C6.7	-4.08184	2.93992e-06	0.00166698
A_12_P168704	NM_059398	T08B2.12	-4.08065	0.00027976	0.0255158
A_12_P134225	NM_001027292	Y53C12A.8	-4.08038	0.000105839	0.0127623
A_12_P141364	NM_001047827	T23E7.6	-4.08023	5.38244e-06	0.00223959
A_12_P111482	NM_063824	C07E3.10	-4.08	4.31665e-05	0.00707319
A_12_P119329	NM_069844	F38H4.5	-4.07984	7.28252e-05	0.00990117
A_12_P134791	NM_001026734	C01G12.13	-4.07969	1.06824e-05	0.00317059
A_12_P176590	NM_060528	ZK1025.7	-4.07923	1.60901e-05	0.00396238
A_12_P113206	NM_069711	C05C12.1	-4.07834	6.91696e-06	0.0025262
A_12_P118685	NM_063486	tag-212	-4.07777	7.14953e-06	0.0025784
A_12_P134055	NM_061389	T02H6.7	-4.07692	6.18555e-06	0.0023818
A_12_P152616	NM_001129581	Y51A2B.9	-4.07572	5.76279e-06	0.00230143
A_12_P176193	NM_060144	K07A1.5	-4.0752	6.69935e-05	0.00942396
A_12_P117318	NM_065520	M88.3	-4.06604	7.85033e-06	0.00271151
A_12_P136910	NM_001027327	ZK1248.20	-4.06355	9.21364e-05	0.0115872
A_12_P112703	NM_070358	T27E7.1	-4.06245	1.55975e-05	0.00388612
A_12_P109140	NM_066808	K03H1.8	-4.06227	8.58343e-05	0.0110711
A_12_P115607	NM_059567	C48B6.4	-4.06168	3.90068e-05	0.00661994
A_12_P113590	NM_066805	K03H1.9	-4.06161	1.65922e-05	0.00403496
A_12_P112811	NM_063640	AH6.3	-4.0604	6.00304e-06	0.00234111
A_12_P131205	NM_001047693	T02B11.9	-4.05444	0.000103807	0.0125675
A_12_P140545	NM_001128964	D1081.10	-4.0542	7.03614e-05	0.00970099
A_12_P165525	NM_001129424	D1086.17	-4.05379	3.55275e-06	0.00183422
A_12_P152960	NM_001047237	Y37E3.19	-4.05373	8.96192e-05	0.011354
A_12_P114579	NM_061985	Y110A2AL.9	-4.05316	5.15576e-07	0.000611175
A_12_P117940	NM_001027337	rnh-1.1	-4.04976	6.83182e-06	0.00251111
A_12_P137532	NM_001276812	Y67D8B.3	-4.04891	4.8868e-05	0.00766065
A_12_P117820	NM_068366	F36H12.3	-4.04877	2.81042e-05	0.00545261
A_12_P176190	NM_060144	K07A1.5	-4.0486	2.86513e-05	0.00550812
A_12_P151195	NM_058279	spe-8	-4.04766	5.53609e-06	0.00226746
A_12_P155845	NM_001027398	F37C12.18	-4.04628	5.03012e-06	0.0021592
A_12_P119995	NM_062476	F11G11.9	-4.0455	1.00465e-05	0.00305323
A_12_P120310	NM_064629	C01G12.3	-4.04402	7.67679e-05	0.0102595
A_12_P105612	NM_067549	F56A11.6	-4.04286	4.88826e-06	0.00212878
A_12_P119457	NM_062566	C27D6.3	-4.04121	1.94028e-05	0.00438528
A_12_P114428	NM_058498	Y71G12B.3	-4.03712	6.29681e-06	0.00241325
A_12_P117648	NM_059802	C54G4.2	-4.03608	3.43359e-06	0.0018041
A_12_P148645	NM_070877	ugt-42	-4.03483	1.19519e-07	0.000260077
A_12_P156245	NM_069338	T13F2.12	-4.03421	3.7524e-06	0.0018756
A_12_P106128	NM_068484	H04M03.3	-4.03371	0.00019442	0.0196612
A_12_P103344	NM_062744	K05F1.8	-4.03264	3.12931e-05	0.00578869
A_12_P141329	NM_001026905	T23B7.2	-4.031	2.39698e-06	0.00148012
A_12_P118681	NM_062049	clec-123	-4.02876	2.48699e-06	0.00152095
A_12_P101916	NM_062278	nep-3	-4.02679	0.000178692	0.0184949
A_12_P176593	NM_060528	bah-1	-4.02664	3.52483e-05	0.00621428
A_12_P179404	NM_066135	R01H2.2	-4.02532	8.85752e-06	0.00287467
A_12_P142617	NM_066935	Y39A1A.2	-4.02365	1.04117e-05	0.00311203
A_12_P102737	NM_063603	Y51B9A.7	-4.02284	4.95243e-08	0.000176324
A_12_P162373	NM_065170	Y54F10AM.6	-4.02055	1.20968e-05	0.00339234
A_12_P168705	NM_059398	T08B2.12	-4.01871	7.26471e-05	0.00989559
A_12_P138167	NM_001038263	C29E4.14	-4.01521	0.000483262	0.0382144
A_12_P118257	NM_063590	F42A8.1	-4.01397	4.53809e-05	0.00727983
A_12_P103269	NM_067570	cutl-28	-4.01054	0.000402069	0.0332906
A_12_P110205	NM_069474	ech-9	-4.00915	3.75058e-06	0.0018756
A_12_P109464	NM_062575	C34F11.2	-4.00808	1.44802e-05	0.00374254
A_12_P105454	NM_064559	Y48B6A.5	-4.00567	7.80961e-06	0.00270484
A_12_P144510	NM_001038300	ZK688.10	-4.00423	9.26357e-06	0.00292656
A_12_P136421	NM_061985	Y110A2AL.9	-4.00331	4.07784e-07	0.00053371
A_12_P141360	NM_001047827	T23E7.6	-4.00239	1.31831e-05	0.00354571
A_12_P102303	NM_067297	ZK1010.5	-4.00166	2.29075e-06	0.00145442
A_12_P141363	NM_001047827	T23E7.6	-3.99989	6.99633e-06	0.00254184
A_12_P115915	NM_064381	Y81G3A.4	-3.99802	1.42237e-05	0.00371602
A_12_P114174	NM_062554	F58A6.5	-3.99656	1.55353e-05	0.00388612
A_12_P105119	NM_001026710	ZK858.8	-3.99555	1.82087e-05	0.00425276
A_12_P108417	NM_064612	K10H10.7	-3.99403	4.74973e-06	0.00209097
A_12_P102129	NM_060549	F15D3.4	-3.99287	9.70294e-06	0.00301202
A_12_P103387	NM_065073	B0524.2	-3.98883	3.5439e-06	0.00183422
A_12_P173809	NM_062094	wht-4	-3.98817	3.54627e-06	0.00183422
A_12_P168005	NM_070499	Y105C5B.11	-3.98534	3.00606e-05	0.00564635
A_12_P108163	NM_059629	M05B5.1	-3.98223	5.36092e-06	0.00223538
A_12_P110799	NM_065598	F26A1.3	-3.98025	1.03232e-05	0.00310388
A_12_P103693	NM_060917	ssp-31	-3.97655	0.000208332	0.0207213
A_12_P112588	NM_059835	T02E1.6	-3.97401	5.75822e-06	0.00230143
A_12_P172508	NM_065545	clec-153	-3.97291	0.000212384	0.0210281
A_12_P131735	NM_001028365	Y59E9AL.2	-3.96938	0.000286965	0.0260216
A_12_P112788	NM_068189	F28E10.4	-3.96871	8.18063e-05	0.0107354
A_12_P116640	NM_060764	T27F6.1	-3.96663	9.69537e-06	0.00301202
A_12_P116881	NM_070264	H08M01.1	-3.96132	6.16891e-05	0.00892524
A_12_P120171	NM_076196	wrt-6	-3.96048	0.000188235	0.0191941
A_12_P105742	NM_063995	sfxn-1.2	-3.95924	3.70127e-05	0.00640056
A_12_P152962	NM_001047237	Y37E3.19	-3.95808	4.2234e-05	0.00698928
A_12_P112848	NM_065269	R148.7	-3.95526	9.69143e-05	0.0119656
A_12_P111701	NM_072136	C04E6.5	-3.95029	6.07009e-05	0.00883688
A_12_P132010	NM_068092	F49F1.12	-3.94863	4.48224e-06	0.00205636
A_12_P119555	NM_069692	C08F8.6	-3.94827	5.59617e-06	0.00227827
A_12_P106156	NM_062800	ZK84.5	-3.94759	0.000126381	0.0143986
A_12_P116477	NM_001026057	C48D5.3	-3.9475	3.35432e-06	0.00179312
A_12_P100709	NM_073186	R04B5.1	-3.94681	5.42115e-06	0.00224854
A_12_P147351	NM_063387	M05D6.1	-3.94571	1.72298e-05	0.00412019
A_12_P112766	NM_074344	T09F5.10	-3.94475	1.3273e-05	0.00355669
A_12_P176591	NM_060528	ZK1025.7	-3.94377	9.82432e-05	0.0120917
A_12_P100603	NM_067461	B0545.4	-3.9425	8.58689e-06	0.00282421
A_12_P116026	NM_069951	wht-5	-3.93871	6.01454e-06	0.00234111
A_12_P111825	NM_065979	F47D12.7	-3.93824	6.76623e-06	0.00250109
A_12_P112770	NM_065460	R10E4.7	-3.93747	2.26761e-05	0.00477461
A_12_P114708	NM_069667	M7.7	-3.93631	8.88101e-06	0.00287515
A_12_P158720	NM_077831	cyp-13B1	-3.93584	2.62092e-07	0.000398598
A_12_P100357	NM_066634	ZC84.6	-3.93526	0.000181157	0.0186762
A_12_P165524	NM_001129424	D1086.17	-3.9345	6.31958e-06	0.00241325
A_12_P154406	NM_001083172	H38K22.6	-3.93377	5.15165e-05	0.00788062
A_12_P114584	NM_062096	nep-13	-3.93283	1.61113e-05	0.00396343
A_12_P174823	NM_001047500	K08E7.5	-3.93141	5.09789e-05	0.00783505
A_12_P173810	NM_062094	wht-4	-3.93019	2.59917e-06	0.00157247
A_12_P102433	NM_171335	ZK354.2	-3.92907	4.07656e-05	0.00683273
A_12_P117832	NM_066659	K04H4.5	-3.9246	1.47809e-05	0.00379097
A_12_P177930	NM_062278	nep-3	-3.92435	8.59257e-05	0.0110723
A_12_P112950	NM_001047169	B0261.6	-3.92421	5.05295e-05	0.00780572
A_12_P106427	NM_067183	Y75B8A.11	-3.92397	7.23032e-05	0.00986283
A_12_P107124	NM_069282	ttr-9	-3.91945	2.23117e-06	0.00143824
A_12_P114808	NM_063860	ZK666.8	-3.9178	1.69972e-05	0.00408818
A_12_P116751	NM_065170	Y54F10AM.6	-3.91618	6.84738e-06	0.00251332
A_12_P115043	NM_072685	C09H5.7	-3.91601	4.59686e-05	0.00735302
A_12_P172812	NM_063652	F35H8.1	-3.91528	5.57347e-05	0.00831718
A_12_P118396	NM_063336	F35C11.3	-3.91477	5.21493e-05	0.00794027
A_12_P107125	NM_063404	W01C9.4	-3.91452	4.04712e-06	0.00194368
A_12_P111105	NM_001129498	K06B4.15	-3.91427	1.45171e-05	0.00374254
A_12_P107758	NM_058651	W03D8.3	-3.91192	9.2641e-05	0.0116283
A_12_P149080	NM_001128986	F21C3.7	-3.9115	5.71711e-05	0.00843962
A_12_P108571	NM_062129	T06D4.4	-3.90855	7.8885e-05	0.0104782
A_12_P104294	NM_068306	C09B9.2	-3.90594	2.60892e-06	0.00157247
A_12_P100020	NM_069154	C53B4.2	-3.90421	3.28795e-06	0.00177469
A_12_P118952	NM_067860	Y54G2A.15	-3.9007	7.41341e-05	0.0100063
A_12_P150800	NM_074780	F36D3.5	-3.89654	2.01671e-06	0.00135266
A_12_P145071	NM_066159	B0280.11	-3.89353	2.23927e-05	0.0047468
A_12_P114915	NM_061894	K02F6.2	-3.89005	2.89675e-05	0.00554002
A_12_P141361	NM_001047827	T23E7.6	-3.88733	5.4499e-06	0.00225333
A_12_P116628	NM_060255	B0379.2	-3.88727	2.57319e-05	0.00514082
A_12_P109500	NM_058495	Y71G12B.27	-3.88646	2.33191e-05	0.00485918
A_12_P106816	NM_075427	W04E12.5	-3.886	1.94324e-06	0.00132605
A_12_P109133	NM_069436	C04G2.8	-3.88452	1.36286e-05	0.00361223
A_12_P120262	NM_066491	C06E1.8	-3.88451	2.23532e-06	0.00143824
A_12_P105101	NM_069712	C05C12.5	-3.88393	2.68714e-05	0.00527177
A_12_P100439	NM_059515	C17F3.1	-3.88348	0.000302738	0.0271079
A_12_P159675	NM_069474	ech-9	-3.88347	5.66322e-06	0.00228612
A_12_P100483	NM_065393	F37A8.2	-3.88129	3.05137e-05	0.0057014
A_12_P178074	NM_064300	nhr-234	-3.88089	3.96924e-08	0.000155743
A_12_P105302	NM_001028828	F59A1.15	-3.88032	4.06266e-06	0.00194829
A_12_P106692	NM_068302	T28H11.7	-3.87983	1.87101e-05	0.00429739
A_12_P111509	NM_074780	F36D3.5	-3.87972	1.7587e-06	0.00124337
A_12_P119983	NM_073694	sqt-3	-3.87955	2.5109e-05	0.00506536
A_12_P177214	NM_063314	T05C12.1	-3.8791	1.55445e-05	0.00388612
A_12_P115414	NM_059361	ssp-16	-3.87745	4.45821e-06	0.00205636
A_12_P115761	NM_062749	ZK1248.5	-3.87613	4.79845e-06	0.00210368
A_12_P158829	NM_068860	F33D4.6	-3.87534	0.000213593	0.0211265
A_12_P173808	NM_062094	wht-4	-3.87521	3.23076e-05	0.00587429
A_12_P102485	NM_001028167	R102.10	-3.87342	9.70395e-07	0.0008938
A_12_P105129	NM_001129116	C16D2.1	-3.87291	2.68146e-05	0.00526664
A_12_P118538	NM_074101	AH10.1	-3.87273	1.17879e-05	0.00333232
A_12_P180594	NM_068364	F36H12.4	-3.87271	8.22813e-06	0.00276651
A_12_P111054	NM_068162	R08C7.8	-3.86958	1.18077e-05	0.00333554
A_12_P130991	NM_066925	T21C12.4	-3.86843	1.82975e-05	0.00426284
A_12_P103023	NM_068142	W03B1.1	-3.86469	0.000576651	0.043456
A_12_P137750	NM_058857	fkb-5	-3.86282	1.04822e-06	0.000936892
A_12_P117085	NM_066551	F44E2.4	-3.86263	2.3665e-07	0.000373722
A_12_P136914	NM_001027327	ZK1248.20	-3.86105	9.54734e-05	0.0118353
A_12_P102656	NM_071222	Y5H2A.1	-3.8582	2.91763e-05	0.00556604
A_12_P105147	NM_001047371	B0280.17	-3.85461	1.0012e-05	0.00304768
A_12_P107542	NM_070097	scl-10	-3.8542	4.91602e-06	0.00213613
A_12_P134790	NM_001026734	C01G12.13	-3.85394	8.30113e-05	0.0108427
A_12_P103836	NM_069318	ZK1251.3	-3.85061	0.000163608	0.0173081
A_12_P107661	NM_069363	K07F5.6	-3.8506	1.50703e-05	0.00381757
A_12_P109742	NM_077832	cyp-13B1	-3.84841	7.20112e-08	0.000206244
A_12_P154971	NM_001028368	Y59E9AL.8	-3.84836	5.75273e-05	0.00847307
A_12_P108338	NM_064924	BE0003N10.3	-3.84708	7.35166e-07	0.000756407
A_12_P152618	NM_001129581	Y51A2B.9	-3.84521	5.24056e-06	0.00220934
A_12_P166214	NM_073570	acl-10	-3.84506	5.09036e-05	0.00782653
A_12_P107936	NM_075196	Y51A2B.5	-3.84444	4.6634e-06	0.00207748
A_12_P180598	NM_068364	F36H12.4	-3.83828	1.2695e-05	0.00347123
A_12_P149723	NM_069390	spe-29	-3.83792	2.12357e-05	0.00460096
A_12_P101409	NM_078024	sym-5	-3.83734	1.60253e-06	0.00119315
A_12_P116310	NM_066807	gln-2	-3.83382	7.5502e-06	0.00265696
A_12_P179314	NM_060672	F15H9.1	-3.83303	2.958e-05	0.00561513
A_12_P115672	NM_060144	K07A1.5	-3.83226	2.363e-05	0.00489021
A_12_P112724	NM_001029282	acn-1	-3.82774	1.37682e-06	0.00110476
A_12_P104481	NM_062131	nep-10	-3.82772	0.000382257	0.032144
A_12_P146540	NM_001083225	K07F5.17	-3.82646	2.16615e-05	0.00465055
A_12_P114293	NM_063716	ZK938.1	-3.82613	0.000156047	0.0167324
A_12_P102044	NM_060222	F52F12.5	-3.82182	7.53155e-05	0.0101309
A_12_P152628	NM_060528	ZK1025.7	-3.81968	0.000417086	0.0341906
A_12_P102963	NM_059985	F36A2.10	-3.81872	0.000133236	0.0149796
A_12_P176592	NM_060528	bah-1	-3.81861	0.000246302	0.0233155
A_12_P113343	NM_001026735	C01G12.9	-3.81733	0.000351443	0.0302958
A_12_P144074	NM_001028517	C30G7.3	-3.81671	1.42585e-05	0.00371717
A_12_P120027	NM_072741	W02D7.4	-3.81466	1.53485e-06	0.00116807
A_12_P107302	NM_077034	dpy-6	-3.81437	3.08374e-07	0.000448141
A_12_P108641	NM_072350	K11C4.1	-3.81415	7.52305e-06	0.00265455
A_12_P116546	NM_066135	R01H2.2	-3.8133	2.20713e-06	0.00143101
A_12_P104521	NM_074156	sss-2	-3.81276	5.76632e-06	0.00230143
A_12_P137575	NM_060136	C36F7.5	-3.81145	1.70825e-05	0.00410204
A_12_P119234	NM_064334	snf-5	-3.80929	8.5827e-05	0.0110711
A_12_P114386	NM_001028195	T08B6.9	-3.80781	6.55026e-05	0.00928526
A_12_P137916	NM_001136288	D1081.12	-3.80723	2.20314e-05	0.00470355
A_12_P155327	NM_074253	nspa-8	-3.80628	0.000328143	0.0288237
A_12_P112881	NM_069062	Y59H11AM.4	-3.80523	6.08027e-05	0.00883937
A_12_P105379	NM_074007	F20G2.3	-3.80181	2.17516e-07	0.000357886
A_12_P117580	NM_060006	F53B6.4	-3.7974	7.67047e-06	0.00267529
A_12_P117299	NM_058879	F28H1.5	-3.79691	0.000372042	0.0315496
A_12_P112077	NM_067262	BE10.1	-3.79678	2.80807e-06	0.00162621
A_12_P176644	NM_059096	F54C1.8	-3.79345	8.69651e-06	0.00284121
A_12_P119681	NM_071106	hsp-16.2	-3.79232	5.33091e-08	0.00018032
A_12_P106781	NM_001047189	F26B1.5	-3.79217	1.93237e-05	0.00438275
A_12_P153971	NM_001038276	F54H12.7	-3.79022	1.16111e-05	0.00331339
A_12_P113393	NM_074321	C01G10.1	-3.78837	7.43993e-06	0.00264145
A_12_P168701	NM_059794	T22C1.9	-3.78642	5.60894e-06	0.00227827
A_12_P118288	NM_182250	isl-1	-3.78615	6.92561e-06	0.0025262
A_12_P153970	NM_001038276	F54H12.7	-3.78421	6.45149e-06	0.00243873
A_12_P119108	NM_058944	Y47D9A.4	-3.78362	0.000596095	0.044534
A_12_P109610	NM_058563	Y39G10AR.16	-3.78198	7.83031e-06	0.00270698
A_12_P173194	NM_070378	Y57G11C.6	-3.78082	5.63146e-06	0.00228048
A_12_P160030	NM_060423	C35E7.9	-3.78041	3.33187e-05	0.00598875
A_12_P151777	NM_001026796	C17F4.12	-3.77796	5.21082e-05	0.0079371
A_12_P163029	NM_059995	snf-2	-3.77775	3.24757e-05	0.0058912
A_12_P102680	NM_059744	T23G11.1	-3.77618	1.36386e-05	0.00361223
A_12_P105891	NM_069492	R09E10.3	-3.77518	8.40303e-05	0.0109141
A_12_P104175	NM_062887	F58F12.3	-3.77426	8.06808e-06	0.00273831
A_12_P112801	NM_065918	F40H6.1	-3.77169	5.08081e-06	0.00216966
A_12_P177929	NM_062278	nep-3	-3.77014	0.000529138	0.0408533
A_12_P130424	NM_073044	nas-3	-3.76927	9.77212e-06	0.00302026
A_12_P107249	NM_059896	D1081.3	-3.76829	1.94232e-05	0.00438528
A_12_P110825	NM_060266	Y106G6D.3	-3.76477	2.05547e-05	0.00451323
A_12_P119227	NM_077467	C34F6.1	-3.76476	3.64983e-06	0.00185746
A_12_P158195	NM_066657	K04H4.2	-3.7629	6.54419e-06	0.00246665
A_12_P110073	NM_073184	F57A8.6	-3.76221	8.1075e-06	0.00274713
A_12_P108255	NM_069644	Y69E1A.8	-3.75839	4.74064e-06	0.00209097
A_12_P111626	NM_062745	K05F1.9	-3.75681	1.98604e-06	0.00133964
A_12_P162531	NM_001047371	B0280.17	-3.75467	5.88586e-06	0.0023156
A_12_P180596	NM_068364	F36H12.4	-3.74932	1.28439e-05	0.00349006
A_12_P138601	NM_058598	C55C2.3	-3.74854	5.12763e-05	0.00786376
A_12_P143489	NM_001129116	C16D2.1	-3.74751	3.81078e-05	0.00652664
A_12_P173343	NM_069999	F53B2.5	-3.74567	3.34354e-05	0.00600392
A_12_P176192	NM_060144	K07A1.5	-3.74488	0.000226232	0.0219612
A_12_P152750	NM_063716	ZK938.1	-3.74429	0.00018749	0.019138
A_12_P108919	NM_063521	F44G4.5	-3.74131	3.79373e-05	0.00651166
A_12_P180595	NM_068364	F36H12.4	-3.73972	1.09602e-05	0.00322377
A_12_P110726	NM_059426	F26B1.1	-3.73896	1.50324e-05	0.00381757
A_12_P180597	NM_068364	F36H12.4	-3.73798	1.36289e-05	0.00361223
A_12_P143488	NM_001129116	C16D2.1	-3.73703	5.44316e-05	0.00818613
A_12_P105937	NM_064210	C50E10.1	-3.73641	3.83381e-05	0.0065461
A_12_P102823	NM_077831	cyp-13B1	-3.73516	1.03632e-07	0.000250152
A_12_P170439	NM_069335	C28D4.5	-3.73374	0.0002231	0.0217542
A_12_P116384	NM_073192	R04B5.11	-3.72969	0.000140734	0.0155594
A_12_P115845	NM_076524	C25F6.6	-3.72915	3.1881e-05	0.0058354
A_12_P109535	NM_062136	nep-6	-3.72885	1.33087e-05	0.00355965
A_12_P103283	NM_171343	Y4C6A.4	-3.72802	0.000153141	0.0165079
A_12_P101892	NM_063787	F27E5.3	-3.72657	1.0199e-05	0.00308072
A_12_P143601	NM_074222	C47E8.1	-3.72614	1.16892e-06	0.000999253
A_12_P170949	NM_073192	R04B5.11	-3.72529	6.17743e-05	0.00893098
A_12_P112019	NM_068268	T08B6.4	-3.72487	5.43273e-06	0.00224992
A_12_P116513	NM_074513	Y6E2A.8	-3.72467	2.44088e-05	0.00498303
A_12_P176589	NM_060528	bah-1	-3.72432	4.49111e-05	0.00725026
A_12_P104187	NM_060528	ZK1025.7	-3.72341	0.000105957	0.0127727
A_12_P103446	NM_063314	T05C12.1	-3.72307	3.72369e-05	0.00643637
A_12_P162614	NM_067471	Y38C1AA.7	-3.72258	1.96001e-05	0.00439713
A_12_P113107	NM_061770	F07E5.7	-3.72192	0.000477289	0.0378642
A_12_P166054	NM_069575	R102.8	-3.71478	1.15026e-05	0.00329682
A_12_P119908	NM_001029102	Y60A3A.23	-3.71301	0.000309878	0.0275522
A_12_P136911	NM_001027327	ZK1248.20	-3.71095	0.000187054	0.0191146
A_12_P108415	NM_060926	F44F1.3	-3.70988	0.00022932	0.0221788
A_12_P100400	NM_069640	Y69E1A.4	-3.70859	2.79785e-06	0.00162397
A_12_P103113	NM_060913	ZK1225.2	-3.70602	0.000385364	0.0323161
A_12_P134114	NM_182316	hsp-16.41	-3.70385	1.29047e-05	0.00349745
A_12_P136322	NM_072081	M03E7.3	-3.70385	0.000219268	0.0215088
A_12_P110030	NM_067041	wht-8	-3.70135	3.64484e-05	0.00634214
A_12_P119549	NM_065912	tbx-7	-3.70092	1.32899e-05	0.00355703
A_12_P111331	NM_069816	T22B3.2	-3.70031	8.40417e-06	0.0027922
A_12_P142057	NM_074299	C25D7.12	-3.69877	7.22276e-06	0.00258963
A_12_P115785	NM_065397	R10E9.2	-3.69702	1.3423e-05	0.00357803
A_12_P119544	NM_063865	F59B10.5	-3.6947	0.000118437	0.0138222
A_12_P119932	NM_073075	K09G1.2	-3.69101	2.22569e-05	0.00472311
A_12_P108870	NM_059296	F33D11.7	-3.69043	8.45639e-06	0.00280471
A_12_P156616	NM_060540	F32B4.2	-3.68929	8.63659e-06	0.00283106
A_12_P110883	NM_062962	C18H9.1	-3.68905	7.80964e-07	0.000779722
A_12_P113406	NM_001028578	D1086.10	-3.6889	6.28656e-05	0.00905207
A_12_P109434	NM_059411	C10G11.9	-3.68825	1.79109e-05	0.0042304
A_12_P168079	NM_072224	F57F4.1	-3.68602	3.05737e-06	0.00170645
A_12_P152980	NM_076451	hsd-3	-3.68592	2.60034e-08	0.000125516
A_12_P109035	NM_060304	Y106G6G.4	-3.68349	3.24695e-05	0.0058912
A_12_P106900	NM_072837	ZC190.7	-3.68319	9.60129e-06	0.00299706
A_12_P118145	NM_061768	fbxb-36	-3.67984	4.31293e-05	0.00707319
A_12_P137249	NM_001047241	Y53C10A.15	-3.6798	0.000300237	0.0269516
A_12_P104949	NM_068307	C09B9.4	-3.67932	1.49042e-05	0.00380965
A_12_P163274	NM_171348	C55C3.6	-3.67906	1.34462e-06	0.00108559
A_12_P113202	NM_058761	Y47G6A.13	-3.67693	4.41461e-05	0.00716074
A_12_P173042	NM_058761	Y47G6A.13	-3.67648	2.99211e-06	0.0016844
A_12_P153972	NM_001038276	F54H12.7	-3.67609	1.11564e-05	0.0032498
A_12_P110966	NM_067406	T05D4.5	-3.67437	5.00941e-06	0.0021583
A_12_P106121	NM_065251	H06I04.5	-3.67411	2.40699e-05	0.00494701
A_12_P177794	NM_059541	acdh-5	-3.67395	5.86161e-05	0.00860611
A_12_P102545	NM_060336	Y106G6H.13	-3.67369	1.35718e-05	0.00361223
A_12_P134265	NM_074111	ZC376.8	-3.67245	0.00049077	0.038629
A_12_P166274	NM_070094	F49E11.2	-3.67112	0.000102913	0.0124824
A_12_P136582	NM_001029102	Y60A3A.23	-3.67078	0.000229752	0.0221798
A_12_P117796	NM_059321	B0207.1	-3.67054	0.000318962	0.0281622
A_12_P109982	NM_067810	Y69A2AR.19	-3.66414	5.08768e-05	0.00782548
A_12_P173202	NM_062136	nep-6	-3.66235	3.40411e-06	0.00180012
A_12_P136323	NM_072081	M03E7.3	-3.66181	0.000478748	0.0379493
A_12_P173207	NM_067041	wht-8	-3.66121	0.000168861	0.0177128
A_12_P102402	NM_001027214	W02B12.12	-3.65984	6.42674e-06	0.00243585
A_12_P157396	NM_069981	C25G4.8	-3.65937	3.07587e-06	0.00170784
A_12_P134595	NM_070002	ZK795.2	-3.65645	1.87844e-05	0.00430748
A_12_P113176	NM_073392	col-153	-3.65535	2.63121e-05	0.00520637
A_12_P162528	NM_001047371	B0280.17	-3.65425	1.13783e-05	0.00328018
A_12_P109553	NM_062230	C46E10.1	-3.65233	1.66723e-05	0.00404571
A_12_P178075	NM_064300	nhr-234	-3.65225	3.66134e-08	0.000149894
A_12_P151986	NM_001129051	T27C10.8	-3.64979	1.09382e-05	0.00321971
A_12_P111243	NM_001047557	Y38H8A.2	-3.64912	0.00017408	0.018142
A_12_P141946	NM_001025985	C07A9.13	-3.64453	4.0401e-06	0.00194269
A_12_P117171	NM_074662	F44G3.10	-3.64319	3.03659e-06	0.00170201
A_12_P170937	NM_074229	R08A2.3	-3.64262	0.000588729	0.0441214
A_12_P118928	NM_068049	clec-79	-3.63881	2.74638e-06	0.00161561
A_12_P106772	NM_065951	C23G10.1	-3.63845	9.12697e-06	0.00290681
A_12_P162409	NM_067061	T28D6.3	-3.63717	4.19997e-05	0.00696786
A_12_P108437	NM_065372	R13G10.4	-3.636	6.74283e-06	0.00250109
A_12_P117326	NM_069557	C43F9.6	-3.63347	1.07637e-05	0.00318502
A_12_P113342	NM_075989	F53B1.4	-3.62908	0.000168972	0.0177179
A_12_P107884	NM_075613	Y44A6D.5	-3.62906	2.9971e-05	0.00564635
A_12_P109210	NM_069969	acl-13	-3.62889	2.56254e-05	0.00512737
A_12_P116329	NM_058836	gsp-4	-3.62779	2.98666e-05	0.00564094
A_12_P104400	NM_062576	C34F11.1	-3.62733	0.000135646	0.0151722
A_12_P141446	NM_001027214	W02B12.12	-3.62536	5.72867e-06	0.00229835
A_12_P176647	NM_059096	F54C1.8	-3.62307	1.11867e-05	0.00325139
A_12_P100221	NM_077252	R07B1.5	-3.62189	0.000102658	0.0124707
A_12_P106808	NM_060109	F46A9.2	-3.62172	3.54624e-05	0.00624047
A_12_P177865	NM_069576	R102.3	-3.61834	6.38781e-06	0.0024287
A_12_P103617	NM_062948	T19D12.5	-3.61511	2.91114e-05	0.00556114
A_12_P110867	NM_062729	C18A3.7	-3.61373	1.79002e-05	0.0042304
A_12_P101735	NM_069842	F38H4.4	-3.61157	6.53497e-05	0.00927699
A_12_P159955	NM_058279	spe-8	-3.60592	7.51084e-06	0.00265455
A_12_P118896	NM_001047493	JC8.12	-3.60491	0.00038126	0.0320886
A_12_P100403	NM_064805	F30H5.3	-3.6039	0.000252552	0.0237183
A_12_P134381	NM_001026655	Y71G12B.33	-3.60205	0.000129124	0.0146051
A_12_P111285	NM_001129717	Y41G9A.5	-3.60151	1.67419e-08	0.000104456
A_12_P115370	NM_062094	wht-4	-3.59632	1.35197e-05	0.00360135
A_12_P172993	NM_068646	C17H12.5	-3.5896	0.000108348	0.0130128
A_12_P107580	NM_001026486	W03F11.5	-3.58831	3.8613e-06	0.00190337
A_12_P117811	NM_064300	nhr-234	-3.58712	5.91871e-08	0.000187287
A_12_P103725	NM_064664	Y54E2A.9	-3.58633	0.000245312	0.0232462
A_12_P102158	NM_069592	Y69E1A.3	-3.58414	8.76103e-06	0.00285279
A_12_P100968	NM_001027707	Y47D3A.31	-3.58253	0.000185966	0.019032
A_12_P107997	NM_063606	Y51B9A.3	-3.58223	3.62354e-06	0.00185537
A_12_P105177	NM_060672	F15H9.1	-3.58173	4.33361e-05	0.007085
A_12_P116177	NM_063317	tctex-1	-3.57898	0.000323646	0.028486
A_12_P141405	NM_058650	W03D8.5	-3.57604	0.000457882	0.0367031
A_12_P100320	NM_064140	ZK930.4	-3.57373	3.85621e-05	0.00656273
A_12_P137915	NM_001136288	D1081.12	-3.56927	1.4781e-05	0.00379097
A_12_P141445	NM_001027214	W02B12.12	-3.56767	5.93763e-06	0.00232745
A_12_P107437	NM_066626	ZK512.8	-3.56732	1.89101e-05	0.00432429
A_12_P110900	NM_059335	C06A5.2	-3.56726	8.47042e-06	0.00280471
A_12_P105920	NM_064318	Y46G5A.14	-3.56404	5.11854e-05	0.00786062
A_12_P108563	NM_063766	F52H3.6	-3.5636	0.000206868	0.0206408
A_12_P108858	NM_059028	gsp-3	-3.56334	1.24154e-05	0.00343834
A_12_P147055	NM_063763	ZK892.5	-3.55817	1.73116e-05	0.00412925
A_12_P150845	NM_060798	H16D19.3	-3.55761	0.000151191	0.0163742
A_12_P101880	NM_001028272	Y37E11B.10	-3.55649	3.48507e-05	0.00616803
A_12_P158825	NM_068860	F33D4.6	-3.55376	0.000215034	0.0212155
A_12_P116143	NM_060178	C04F12.7	-3.55293	5.29432e-05	0.00802689
A_12_P176759	NM_068298	ssp-11	-3.55191	0.000147208	0.0160625
A_12_P108018	NM_063886	C14A4.8	-3.55153	0.000152238	0.0164467
A_12_P107056	NM_070378	Y57G11C.6	-3.54873	9.30037e-06	0.00293347
A_12_P114129	NM_073102	F40F9.3	-3.54763	7.56236e-06	0.00265885
A_12_P107664	NM_058856	fkb-5	-3.54634	9.27173e-07	0.000868257
A_12_P112057	NM_068161	R08C7.5	-3.54277	2.76307e-05	0.0053858
A_12_P111841	NM_070454	Y73F8A.20	-3.54141	0.000305423	0.0272634
A_12_P119128	NM_062924	F18C5.4	-3.54012	1.73092e-06	0.00123394
A_12_P115881	NM_064329	snf-4	-3.53981	1.59214e-05	0.00394642
A_12_P116945	NM_074763	T08G3.7	-3.53813	1.05768e-05	0.00314342
A_12_P102717	NM_067589	F56B3.6	-3.53605	7.63021e-06	0.00267033
A_12_P110834	NM_060423	C35E7.9	-3.53508	1.29068e-05	0.00349745
A_12_P119786	NM_068906	T06C10.3	-3.53486	1.04084e-05	0.00311203
A_12_P179059	NM_068674	ZK381.2	-3.53174	6.43976e-09	8.26835e-05
A_12_P116542	NM_060592	Y47H9B.2	-3.531	5.88355e-06	0.0023156
A_12_P118100	NM_061820	K09F6.3	-3.52709	1.94578e-05	0.00438528
A_12_P150895	NM_059296	F33D11.7	-3.52627	2.97445e-05	0.00563646
A_12_P114125	NM_076454	ZC449.1	-3.52578	5.13967e-05	0.00786843
A_12_P158721	NM_077831	cyp-13B1	-3.52531	1.73191e-08	0.000104456
A_12_P103804	NM_068724	C34D4.2	-3.52514	5.08873e-06	0.00216966
A_12_P107646	NM_067819	Y69A2AR.14	-3.52208	6.76845e-06	0.00250109
A_12_P178060	NM_063182	fbxa-224	-3.51993	0.000216543	0.0213055
A_12_P119413	NM_001027297	Y53F4B.27	-3.51918	0.000219868	0.0215513
A_12_P110895	NM_075195	Y51A2B.4	-3.51692	0.000220375	0.0215797
A_12_P133455	NM_074231	R08A2.2	-3.51637	3.69333e-05	0.00639246
A_12_P175337	NM_059028	gsp-3	-3.51273	1.02153e-05	0.00308088
A_12_P110009	NM_074693	F21H7.2	-3.51253	1.76917e-05	0.00419189
A_12_P106047	NM_066265	R13A5.11	-3.51241	1.53016e-05	0.00385611
A_12_P100667	NM_059272	che-14	-3.51055	3.38908e-07	0.000471654
A_12_P108288	NM_068608	F38A5.11	-3.5087	5.13021e-05	0.00786376
A_12_P105838	NM_076775	C16E9.1	-3.50847	3.59498e-09	7.68733e-05
A_12_P111675	NM_058494	Y71G12B.6	-3.5075	1.75286e-08	0.000104456
A_12_P167765	NM_074751	F26D2.10	-3.50623	1.44589e-05	0.00374254
A_12_P173122	NM_060692	oac-27	-3.50605	4.18805e-05	0.00695718
A_12_P110357	NM_075149	C14A6.7	-3.50444	0.000141486	0.0156074
A_12_P116414	NM_074253	nspa-8	-3.5038	0.000381857	0.0321245
A_12_P104807	NM_064635	F19H8.2	-3.50306	2.43006e-07	0.000378371
A_12_P104020	NM_059541	acdh-5	-3.50217	0.000129357	0.0146273
A_12_P131207	NM_001047693	T02B11.9	-3.50103	4.02028e-05	0.0067673
A_12_P163404	NM_075287	cyp-42A1	-3.49981	2.58661e-05	0.0051545
A_12_P179224	NM_068461	C31H1.2	-3.4988	2.65939e-05	0.00523975
A_12_P106312	NM_059794	T22C1.9	-3.49719	1.96757e-05	0.0044115
A_12_P118833	NM_062294	F53C3.1	-3.49703	5.76883e-06	0.00230143
A_12_P103480	NM_064364	Y38F1A.7	-3.49587	4.38142e-06	0.00203934
A_12_P118722	NM_001136384	F23B2.7	-3.49541	1.23335e-05	0.00342803
A_12_P108190	NM_073219	ZK856.5	-3.49408	0.000179277	0.0185408
A_12_P112640	NM_058593	Y23H5B.8	-3.49207	0.000299589	0.0269243
A_12_P176646	NM_059096	F54C1.8	-3.49125	7.66304e-06	0.00267508
A_12_P152617	NM_001129581	Y51A2B.9	-3.49073	3.04172e-05	0.00569607
A_12_P119789	NM_070400	Y57G11C.23	-3.49019	0.000181051	0.0186702
A_12_P120277	NM_001136461	R07B1.13	-3.48848	3.84161e-05	0.00655652
A_12_P112311	NM_062547	F09C12.8	-3.48784	7.39249e-05	0.00999183
A_12_P109922	NM_072224	F57F4.1	-3.48313	1.14367e-05	0.00328993
A_12_P114609	NM_074231	R08A2.2	-3.48285	3.52398e-05	0.00621428
A_12_P112581	NM_074735	F13A7.1	-3.48264	1.75356e-05	0.0041675
A_12_P149721	NM_069390	spe-29	-3.48098	8.81193e-05	0.0112571
A_12_P101203	NM_077592	Y62H9A.12	-3.48035	4.75251e-05	0.00752368
A_12_P116801	NM_062977	F41G3.5	-3.47991	7.34369e-05	0.00993829
A_12_P107292	NM_059360	T27A3.5	-3.4788	2.09098e-05	0.00456059
A_12_P118090	NM_070971	K10C9.7	-3.47815	1.5335e-05	0.00385958
A_12_P137247	NM_001047241	Y53C10A.15	-3.47814	0.000373307	0.0316296
A_12_P105272	NM_060533	K08C9.1	-3.47803	6.04955e-05	0.00882742
A_12_P144056	NM_073325	C32C4.3	-3.47761	1.21718e-05	0.00339727
A_12_P180461	NM_058623	F32B5.4	-3.47699	3.3449e-05	0.00600392
A_12_P118877	NM_065543	clec-151	-3.47638	7.79099e-06	0.00270484
A_12_P177144	NM_060913	ZK1225.2	-3.47556	3.69665e-05	0.00639538
A_12_P108162	NM_001027313	Y57G7A.3	-3.47447	5.88964e-06	0.0023156
A_12_P108862	NM_171348	C55C3.6	-3.47223	2.37508e-05	0.00490238
A_12_P109068	NM_075404	Y43F8C.5	-3.47152	8.0169e-06	0.00272748
A_12_P104959	NM_062734	F10C1.3	-3.47073	4.72875e-05	0.0075028
A_12_P101386	NM_066840	kel-10	-3.47035	1.22538e-05	0.00340998
A_12_P144511	NM_001038300	ZK688.10	-3.47014	5.45419e-05	0.00819329
A_12_P107342	NM_001029739	peb-1	-3.47008	3.4079e-05	0.00606704
A_12_P162530	NM_001047371	B0280.17	-3.46696	8.88039e-06	0.00287515
A_12_P117327	NM_074802	Y32B12C.3	-3.4658	1.29107e-06	0.00105758
A_12_P168585	NM_059443	ZC328.1	-3.4656	5.01133e-05	0.00777406
A_12_P115875	NM_001026165	let-653	-3.46473	6.50248e-08	0.000196818
A_12_P119408	NM_182413	spe-42	-3.46214	1.18084e-07	0.000258872
A_12_P180490	NM_058822	C32E8.1	-3.46089	3.18868e-05	0.0058354
A_12_P137399	NM_001047557	Y38H8A.2	-3.46027	0.000318084	0.0280982
A_12_P101449	NM_068332	C24D10.1	-3.45895	5.58323e-06	0.00227725
A_12_P106069	NM_068253	H06H21.9	-3.45557	7.9925e-05	0.0105676
A_12_P144055	NM_073325	C32C4.3	-3.45446	7.87203e-05	0.0104705
A_12_P151246	NM_059411	C10G11.9	-3.45431	2.27392e-05	0.00478077
A_12_P143485	NM_001129116	C16D2.1	-3.45391	0.00024371	0.0231651
A_12_P120308	NM_062521	F59A6.4	-3.45334	1.81692e-05	0.00425114
A_12_P115221	NM_059318	B0207.9	-3.45191	8.78992e-05	0.011238
A_12_P168905	NM_066437	ZC262.1	-3.45049	6.40338e-05	0.00915644
A_12_P107379	NM_061428	F28A10.3	-3.45027	5.96121e-06	0.00233131
A_12_P167764	NM_074751	F26D2.10	-3.44979	4.60433e-05	0.00735655
A_12_P101973	NM_061911	D2062.1	-3.44552	0.000244085	0.0231783
A_12_P109585	NM_074783	F36D3.8	-3.44437	3.20867e-05	0.00584223
A_12_P139086	NM_076296	R02E4.1	-3.44348	4.55885e-06	0.0020683
A_12_P101358	NM_068100	scrm-8	-3.43874	1.04007e-05	0.00311203
A_12_P110874	NM_076531	bus-8	-3.43852	8.68359e-06	0.00283935
A_12_P137246	NM_001047241	Y53C10A.15	-3.43681	0.00010363	0.0125538
A_12_P172992	NM_068646	C17H12.5	-3.43634	2.26859e-05	0.00477461
A_12_P107554	NM_069423	W01B6.2	-3.43591	2.20458e-05	0.00470355
A_12_P117276	NM_182257	W03C9.8	-3.43524	6.59565e-05	0.00932938
A_12_P147370	NM_068303	ssq-4	-3.43049	2.48455e-05	0.00503572
A_12_P106258	NM_061537	Y57G7A.6	-3.43046	2.34158e-05	0.00487416
A_12_P117335	NM_069762	C10C6.3	-3.42884	0.000249158	0.0235065
A_12_P155205	NM_059028	gsp-3	-3.42842	1.4791e-05	0.00379097
A_12_P177815	NM_059699	T28F4.3	-3.42747	1.9883e-05	0.00443114
A_12_P113764	NM_060858	Y18D10A.21	-3.42195	7.3492e-05	0.00994017
A_12_P177800	NM_060592	Y47H9B.2	-3.4208	3.3981e-05	0.00605955
A_12_P103185	NM_059781	F55D12.6	-3.42026	1.44978e-05	0.00374254
A_12_P173323	NM_069981	C25G4.8	-3.41995	2.39913e-06	0.00148012
A_12_P108158	NM_073281	snf-10	-3.41785	0.000118671	0.0138363
A_12_P116200	NM_059793	T22C1.8	-3.41701	6.52414e-06	0.00246145
A_12_P102482	NM_068646	C17H12.5	-3.41434	2.20782e-05	0.00470355
A_12_P103075	NM_069408	F44D12.8	-3.41171	7.30911e-05	0.00991672
A_12_P132276	NM_001026221	F16C3.4	-3.41064	0.00033153	0.0290431
A_12_P111383	NM_001083209	F13E9.16	-3.4074	0.000117553	0.0137542
A_12_P172232	NM_060917	ssp-31	-3.4074	0.000623744	0.0462213
A_12_P118787	NM_070646	C52D10.3	-3.40611	2.12619e-05	0.0046041
A_12_P117657	NM_072091	C14C11.1	-3.40367	6.9625e-06	0.00253424
A_12_P100946	NM_077462	C05C9.1	-3.39819	3.24234e-05	0.00588715
A_12_P100457	NM_066396	C30A5.4	-3.39802	2.8574e-05	0.00549863
A_12_P141797	NM_068330	C24D10.2	-3.39191	0.000178931	0.0185099
A_12_P119527	NM_063875	C06A1.3	-3.39179	2.10621e-05	0.00458341
A_12_P115647	NM_069981	C25G4.8	-3.3916	2.64172e-06	0.0015801
A_12_P132275	NM_001026221	F16C3.4	-3.39103	6.38983e-05	0.0091504
A_12_P103096	NM_068092	F49F1.12	-3.38989	1.25865e-05	0.00346768
A_12_P134380	NM_001026655	Y71G12B.33	-3.38824	6.13121e-05	0.00888695
A_12_P105829	NM_062467	C33F10.11	-3.38562	4.87385e-07	0.000588424
A_12_P105443	NM_068892	C33H5.16	-3.38518	1.1088e-05	0.00324027
A_12_P106216	NM_060385	tag-344	-3.38284	0.000359189	0.0307509
A_12_P105488	NM_001129379	C15H11.13	-3.38174	2.32893e-05	0.00485554
A_12_P168404	NM_062554	F58A6.5	-3.38109	6.64032e-05	0.00937118
A_12_P101178	NM_064640	C38C6.3	-3.38107	0.000170763	0.0178818
A_12_P132277	NM_001026221	F16C3.4	-3.37985	3.63873e-05	0.00633904
A_12_P108091	NM_066401	C02F5.5	-3.37767	1.60969e-05	0.00396238
A_12_P109626	NM_073837	grl-2	-3.37638	2.06274e-05	0.00451909
A_12_P110766	NM_065549	T23F11.2	-3.37638	2.21055e-05	0.00470372
A_12_P176645	NM_059096	F54C1.8	-3.37631	2.4555e-05	0.00500143
A_12_P104302	NM_060016	fasn-1	-3.36974	1.4923e-05	0.00380965
A_12_P106860	NM_061533	F47F6.4	-3.36891	3.20022e-05	0.00583655
A_12_P176250	NM_067553	C18H7.7	-3.36794	6.43328e-06	0.00243585
A_12_P168700	NM_059794	T22C1.9	-3.36679	1.64253e-05	0.00401138
A_12_P104626	NM_078071	daf-6	-3.36653	2.05984e-05	0.00451778
A_12_P143700	NM_066396	C30A5.4	-3.36496	3.27471e-05	0.00592673
A_12_P111395	NM_068356	rmd-4	-3.36454	3.53828e-06	0.00183422
A_12_P115893	NM_058800	D1037.5	-3.36241	3.37721e-05	0.00603157
A_12_P155005	NM_067068	Y47D3B.4	-3.36231	3.2333e-09	7.46274e-05
A_12_P103946	NM_063381	F22B5.5	-3.36102	2.01167e-05	0.00445195
A_12_P102221	NM_077157	pes-8	-3.36054	0.000416471	0.0341534
A_12_P107734	NM_067553	C18H7.7	-3.35692	1.73685e-05	0.00413531
A_12_P101769	NM_060946	W08E3.4	-3.35672	1.80123e-05	0.00423492
A_12_P117704	NM_073007	F44A2.7	-3.35564	3.5975e-05	0.00630166
A_12_P111337	NM_060347	F59C6.8	-3.35498	1.5555e-06	0.00117301
A_12_P115483	NM_061389	T02H6.7	-3.35075	1.86691e-05	0.00429709
A_12_P115743	NM_001038247	K02E7.1	-3.34994	3.85741e-05	0.00656273
A_12_P106671	NM_063944	gly-1	-3.34965	0.000247008	0.0233598
A_12_P101337	NM_062741	acdh-8	-3.34863	2.08649e-05	0.00455733
A_12_P120188	NM_072694	D1014.7	-3.34614	0.00030867	0.0274886
A_12_P115010	NM_066706	ZK1098.9	-3.34446	1.28051e-05	0.00348192
A_12_P118238	NM_075150	C14A6.8	-3.34151	3.60184e-05	0.00630361
A_12_P156615	NM_060540	F32B4.2	-3.3414	2.6826e-05	0.00526664
A_12_P141340	NM_001028185	T04B2.8	-3.34045	2.48383e-05	0.00503572
A_12_P116317	NM_060425	C35E7.10	-3.34037	9.47071e-06	0.00296909
A_12_P116161	NM_074697	F21H7.5	-3.34017	0.000531614	0.0409888
A_12_P117898	NM_060679	C15C6.2	-3.33997	0.00016085	0.0171085
A_12_P106723	NM_060640	abt-5	-3.33785	9.90603e-06	0.00302977
A_12_P105723	NM_068781	B0496.6	-3.33621	9.44111e-05	0.0117602
A_12_P117956	NM_069594	T25B9.6	-3.33611	1.53143e-05	0.00385683
A_12_P112211	NM_068044	clec-73	-3.3345	4.72293e-06	0.00209097
A_12_P118111	NM_075287	cyp-42A1	-3.33422	9.31029e-06	0.00293424
A_12_P106777	NM_059359	T27A3.4	-3.33332	2.24822e-05	0.00476039
A_12_P101424	NM_063049	ZK1127.2	-3.3317	3.61288e-05	0.00631731
A_12_P120003	NM_074262	ZC412.5	-3.33143	1.62217e-05	0.0039806
A_12_P111139	NM_062967	T14B4.5	-3.32932	3.72244e-09	7.68733e-05
A_12_P104173	NM_068315	F36H12.9	-3.32704	4.85036e-06	0.00211698
A_12_P141475	NM_060177	C04F12.6	-3.32512	0.000143521	0.0157724
A_12_P162615	NM_067471	Y38C1AA.7	-3.3232	0.000340159	0.0296101
A_12_P162529	NM_001047371	B0280.17	-3.32112	3.15133e-05	0.00580807
A_12_P115551	NM_065557	T04A8.5	-3.31816	3.95162e-05	0.00668858
A_12_P179380	NM_066847	ZK1128.3	-3.31761	1.12048e-05	0.00325425
A_12_P112706	NM_059892	F10D11.4	-3.31747	0.000136604	0.0152489
A_12_P107757	NM_058544	W03F11.4	-3.31587	6.72113e-05	0.0094422
A_12_P110314	NM_061423	F28A10.1	-3.31541	2.36144e-05	0.00488975
A_12_P107601	NM_069336	C28D4.8	-3.31418	8.35496e-05	0.0108805
A_12_P144824	NM_001269284	AC3.12	-3.31405	4.6173e-05	0.00736806
A_12_P106250	NM_060393	C34B2.3	-3.31305	5.91243e-05	0.00866278
A_12_P177254	NM_067068	Y47D3B.4	-3.31243	4.48164e-08	0.000170727
A_12_P114212	NM_061567	Y51H7C.9	-3.3106	4.82219e-05	0.00759273
A_12_P119518	NM_064142	ZK930.7	-3.30789	1.27418e-05	0.00347918
A_12_P119195	NM_069464	abt-1	-3.30689	3.35216e-05	0.00601419
A_12_P101638	NM_061888	K02F6.7	-3.30342	1.21734e-05	0.00339727
A_12_P131410	NM_073564	T04F3.3	-3.30334	2.20696e-05	0.00470355
A_12_P119917	NM_061844	F43C11.7	-3.3025	2.35875e-06	0.00146674
A_12_P176249	NM_067553	C18H7.7	-3.3024	2.38089e-05	0.0049086
A_12_P109894	NM_001026577	Y37F4.5	-3.30227	6.36744e-05	0.00912579
A_12_P117022	NM_060403	B0205.10	-3.30157	1.95562e-05	0.00439483
A_12_P102906	NM_182092	nspd-10	-3.29815	0.00067682	0.0490421
A_12_P116128	NM_061079	C49A1.2	-3.29793	9.27919e-06	0.00292914
A_12_P106213	NM_062523	F59A6.2	-3.29623	0.000512852	0.0399743
A_12_P144820	NM_001269284	AC3.12	-3.29498	7.26995e-05	0.00989628
A_12_P109660	NM_069593	T25B9.4	-3.29494	7.54502e-06	0.00265696
A_12_P112991	NM_075148	C14A6.6	-3.29345	6.00503e-06	0.00234111
A_12_P114017	NM_066266	T04A6.3	-3.29317	0.000338463	0.0294924
A_12_P105643	NM_066367	K06H7.8	-3.28896	3.70632e-06	0.00187164
A_12_P103205	NM_060143	K07A1.4	-3.28863	0.000167588	0.0176199
A_12_P116183	NM_071139	T08B1.6	-3.28826	4.53866e-05	0.00727983
A_12_P158290	NM_060764	T27F6.1	-3.28553	1.13885e-05	0.00328018
A_12_P119898	NM_059030	W09C3.7	-3.2852	4.84161e-05	0.0076055
A_12_P117061	NM_061412	F46F5.14	-3.28421	2.57631e-05	0.00514435
A_12_P111620	NM_062128	T06D4.3	-3.28391	8.62705e-05	0.0110899
A_12_P107003	NM_171300	Y67D8B.5	-3.28276	0.000533783	0.0410834
A_12_P110837	NM_059564	T21G5.4	-3.28225	5.46361e-05	0.00819489
A_12_P120317	NM_060741	T15D6.11	-3.2812	0.000284724	0.0258848
A_12_P116233	NM_069146	C27B7.6	-3.2811	0.000144155	0.0158129
A_12_P119964	NM_073755	cyc-2.2	-3.28064	1.73639e-05	0.00413531
A_12_P106090	NM_068461	C31H1.2	-3.28043	4.94137e-05	0.00769699
A_12_P103135	NM_075618	grl-14	-3.27956	0.000311536	0.0276309
A_12_P144823	NM_001269284	AC3.12	-3.27874	8.75458e-05	0.0112038
A_12_P142615	NM_066935	Y39A1A.2	-3.27552	4.76854e-05	0.00754155
A_12_P154536	NM_072044	ZC317.6	-3.27519	9.98066e-06	0.00304523
A_12_P111552	NM_070634	Y116A8C.33	-3.2745	0.00063277	0.0467335
A_12_P176251	NM_067553	C18H7.7	-3.27129	1.67813e-05	0.00406205
A_12_P115354	NM_069979	C25G4.6	-3.26947	2.85506e-05	0.00549683
A_12_P107745	NM_058596	Y23H5B.1	-3.26914	1.64585e-05	0.00401362
A_12_P117763	NM_059217	F59A3.7	-3.26903	2.33855e-06	0.00146346
A_12_P166235	NM_073738	C13C12.2	-3.26434	5.01539e-05	0.00777406
A_12_P177215	NM_063314	T05C12.1	-3.26318	2.5052e-05	0.0050627
A_12_P118587	NM_059479	T10E9.6	-3.26311	0.00024842	0.0234538
A_12_P173642	NM_067090	Y66D12A.11	-3.26102	4.09041e-05	0.00684073
A_12_P144821	NM_001269284	AC3.12	-3.26099	4.24723e-05	0.00701688
A_12_P120366	NM_072214	fbxa-202	-3.2604	5.43594e-06	0.00224992
A_12_P115511	NM_068949	Y42H9AR.2	-3.2593	8.32773e-05	0.0108596
A_12_P103953	NM_058817	C32E8.4	-3.25843	0.0002199	0.0215513
A_12_P111862	NM_069124	T28C6.5	-3.25809	2.5052e-05	0.0050627
A_12_P104219	NM_074246	Y50E8A.10	-3.25443	0.000170399	0.0178484
A_12_P103159	NM_001026516	Y105E8A.27	-3.25387	7.95504e-06	0.0027237
A_12_P131411	NM_073564	T04F3.3	-3.25316	2.87907e-05	0.00552272
A_12_P163413	NM_061418	F46F5.6	-3.25292	1.86832e-05	0.00429709
A_12_P180464	NM_060540	F32B4.2	-3.25135	2.48087e-05	0.00503572
A_12_P119318	NM_062326	F56D3.1	-3.24586	3.71898e-06	0.00187391
A_12_P137161	NM_059511	ZC581.2	-3.24443	9.32211e-05	0.0116606
A_12_P142355	NM_001028291	Y41E3.18	-3.24424	0.000625585	0.0463351
A_12_P147155	NM_001028302	Y45F10D.16	-3.24403	8.01494e-06	0.00272748
A_12_P108398	NM_069837	M117.4	-3.24392	4.0918e-05	0.00684073
A_12_P111169	NM_062194	F40E12.2	-3.24243	8.48365e-05	0.0109824
A_12_P103052	NM_072951	oac-50	-3.24095	4.37649e-06	0.00203934
A_12_P132790	NM_059987	F36A2.12	-3.24002	1.42319e-05	0.00371602
A_12_P147360	NM_001027573	T03F6.8	-3.23655	8.49263e-05	0.0109904
A_12_P111228	NM_069394	C47E12.10	-3.23303	9.90685e-06	0.00302977
A_12_P150941	NM_058618	F40E3.5	-3.23239	1.07487e-05	0.00318304
A_12_P135977	NM_074271	H12D21.5	-3.23203	0.000483485	0.0382243
A_12_P117653	NM_059315	B0207.7	-3.22886	2.20599e-05	0.00470355
A_12_P118779	NM_073969	fmo-4	-3.22821	2.81878e-08	0.000125684
A_12_P173057	NM_068787	B0496.1	-3.22403	1.45678e-06	0.00113696
A_12_P105345	NM_074222	C47E8.1	-3.22259	4.23169e-05	0.00699709
A_12_P100172	NM_074199	tag-191	-3.2202	3.53816e-06	0.00183422
A_12_P155325	NM_074253	nspa-8	-3.22002	0.000136024	0.0152015
A_12_P118202	NM_001027832	ZK512.10	-3.21818	0.000167002	0.0175771
A_12_P177256	NM_067068	Y47D3B.4	-3.21816	3.45751e-07	0.000476015
A_12_P113622	NM_061775	fbxc-49	-3.21772	3.04389e-05	0.00569607
A_12_P118028	NM_069302	F27C8.5	-3.21432	2.21005e-05	0.00470372
A_12_P108175	NM_074751	F26D2.10	-3.21359	6.5047e-05	0.0092474
A_12_P104803	NM_069096	H23L24.2	-3.21222	8.97058e-05	0.0113562
A_12_P138737	NM_065375	cyp-25A2	-3.20982	2.65171e-06	0.00158143
A_12_P166234	NM_073738	C13C12.2	-3.20966	6.71182e-05	0.00943264
A_12_P100849	NM_064391	F32A11.3	-3.20961	3.19634e-05	0.00583655
A_12_P113774	NM_068787	B0496.1	-3.20908	6.78363e-06	0.00250398
A_12_P118070	NM_071828	T08H10.3	-3.2087	0.000309153	0.027519
A_12_P137395	NM_001047557	Y38H8A.2	-3.20857	0.000442634	0.0357879
A_12_P111814	NM_059511	ZC581.2	-3.20639	7.01034e-05	0.00967869
A_12_P135740	NM_062133	nep-7	-3.20463	4.21308e-06	0.0019917
A_12_P112974	NM_064639	C38C6.5	-3.20052	0.000301996	0.0270724
A_12_P104340	NM_075346	F21D9.2	-3.19546	2.49267e-05	0.00504675
A_12_P117465	NM_058618	F40E3.5	-3.19425	1.62399e-05	0.00398258
A_12_P147056	NM_063763	ZK892.5	-3.19419	4.07586e-05	0.00683273
A_12_P100116	NM_065837	B0244.9	-3.19072	1.60232e-05	0.00396162
A_12_P106541	NM_074661	F44G3.7	-3.18971	1.28688e-05	0.00349439
A_12_P137531	NM_001276812	Y67D8B.3	-3.18908	8.66655e-05	0.0111311
A_12_P114133	NM_064299	Y38E10A.17	-3.18744	3.40764e-05	0.00606704
A_12_P117319	NM_059209	C09D4.3	-3.18576	1.66829e-05	0.00404571
A_12_P102050	NM_072044	ZC317.6	-3.18489	2.54672e-05	0.00510854
A_12_P177169	NM_064703	Y53F4B.19	-3.18406	1.81174e-05	0.0042474
A_12_P169825	NM_001038257	C02F5.14	-3.18282	0.000666421	0.0484684
A_12_P110451	NM_075289	ptr-22	-3.18222	0.000125508	0.0143721
A_12_P103567	NM_069540	C02F4.4	-3.18116	0.000109096	0.0130747
A_12_P102317	NM_063848	ZK673.6	-3.18078	0.000160779	0.0171056
A_12_P113276	NM_060108	F46A9.1	-3.18029	8.24361e-06	0.00276934
A_12_P143487	NM_001129116	C16D2.1	-3.17981	0.000381126	0.0320886
A_12_P109525	NM_065487	R07E5.6	-3.17949	2.87832e-05	0.00552272
A_12_P102045	NM_071170	F36F12.1	-3.1792	1.69905e-05	0.00408818
A_12_P107362	NM_073738	C13C12.2	-3.17742	0.000151492	0.0163977
A_12_P145070	NM_066159	B0280.11	-3.17733	0.000115616	0.0136149
A_12_P116648	NM_065456	R10E4.3	-3.17658	6.76743e-06	0.00250109
A_12_P141342	NM_001028185	T04B2.8	-3.17636	0.000242414	0.0230811
A_12_P132791	NM_059987	F36A2.12	-3.17597	2.32749e-05	0.00485554
A_12_P100665	NM_060452	spe-38	-3.17359	4.39153e-06	0.00204162
A_12_P111183	NM_068982	T09A12.1	-3.17334	0.000117475	0.0137542
A_12_P118167	NM_065544	clec-152	-3.17195	3.28177e-05	0.00593229
A_12_P102495	NM_069214	Y11D7A.9	-3.17176	2.66836e-06	0.00158877
A_12_P103566	NM_068712	ssq-3	-3.17164	4.41359e-05	0.00716074
A_12_P106013	NM_059407	C48E7.1	-3.17065	2.32273e-06	0.00146257
A_12_P100624	NM_058946	Y47D9A.5	-3.17035	3.1015e-05	0.00575706
A_12_P175676	NM_171687	C25F6.7	-3.16967	2.00333e-05	0.00444602
A_12_P110941	NM_077424	nstp-9	-3.16787	0.000626909	0.046412
A_12_P165564	NM_001129209	C29E4.15	-3.1677	3.47197e-08	0.000146102
A_12_P119289	NM_067778	M70.3	-3.16709	1.79866e-05	0.00423492
A_12_P119683	NM_058381	ZC123.1	-3.16613	1.20912e-06	0.0010159
A_12_P112159	NM_060137	F42H11.1	-3.16568	4.59384e-05	0.00735117
A_12_P101544	NM_071459	F02C9.4	-3.16557	2.01227e-06	0.00135199
A_12_P113676	NM_070339	Y67A10A.3	-3.1624	1.98077e-05	0.00442852
A_12_P114298	NM_063781	ZK945.7	-3.16042	1.67559e-05	0.0040584
A_12_P106607	NM_075290	Y80D3A.8	-3.15817	3.82332e-05	0.00653956
A_12_P115363	NM_060692	oac-27	-3.15554	9.11334e-05	0.0114905
A_12_P173148	NM_060764	T27F6.1	-3.15416	6.92359e-06	0.0025262
A_12_P118251	NM_060515	Y53H1C.3	-3.15395	0.000121856	0.0140959
A_12_P104216	NM_063513	C18E9.8	-3.15259	1.23526e-05	0.00342832
A_12_P117056	NM_067803	cdh-10	-3.15239	5.80144e-06	0.00230632
A_12_P108199	NM_069638	Y69E1A.2	-3.14984	1.73847e-05	0.00413665
A_12_P105255	NM_064353	F58G1.3	-3.14126	5.49697e-05	0.00823234
A_12_P114033	NM_072205	K12B6.2	-3.14106	0.000423697	0.0345918
A_12_P119164	NM_068125	F36A4.4	-3.14012	2.40974e-05	0.00494701
A_12_P103419	NM_068126	F36A4.3	-3.13839	0.000157077	0.016821
A_12_P110538	NM_075444	Y116F11B.7	-3.13612	0.00038374	0.032235
A_12_P115458	NM_060555	C17D12.5	-3.13583	4.32928e-05	0.00708087
A_12_P131412	NM_073564	T04F3.3	-3.13485	5.0613e-05	0.00780639
A_12_P115670	NM_001129230	F54H12.8	-3.13482	2.12204e-05	0.00460029
A_12_P119031	NM_075980	F49H12.5	-3.132	5.32422e-06	0.00222824
A_12_P146450	NM_064515	W02B8.4	-3.13161	0.000103126	0.0125006
A_12_P157285	NM_001129374	C14A6.12	-3.13039	7.04467e-06	0.00255526
A_12_P180460	NM_058623	F32B5.4	-3.13033	0.000350198	0.0302197
A_12_P165565	NM_001129209	C29E4.15	-3.13017	1.30376e-07	0.000273564
A_12_P142210	NM_068581	Y73B6BL.24	-3.12836	1.1695e-08	9.40655e-05
A_12_P116724	NM_066674	F54C8.1	-3.12631	5.15748e-06	0.00218538
A_12_P176595	NM_068374	ZK354.8	-3.12524	8.99022e-05	0.0113682
A_12_P173043	NM_058761	Y47G6A.13	-3.12216	7.90567e-06	0.00271289
A_12_P110199	NM_065594	F26A1.4	-3.12164	4.41156e-05	0.00716074
A_12_P142370	NM_001038364	Y59E9AR.10	-3.12102	1.98546e-05	0.00443114
A_12_P114175	NM_060244	C03C11.1	-3.12007	0.000240074	0.0229139
A_12_P102892	NM_069338	T13F2.12	-3.11987	5.72167e-06	0.00229789
A_12_P149720	NM_069390	spe-29	-3.11947	0.000498195	0.0391139
A_12_P102160	NM_074064	R10D12.10	-3.11679	2.23916e-06	0.00143824
A_12_P134596	NM_070002	ZK795.2	-3.11542	0.000202379	0.0202681
A_12_P144085	NM_060393	C34B2.3	-3.11449	0.000104937	0.0126731
A_12_P172175	NM_058381	ZC123.1	-3.11298	7.27526e-05	0.00989817
A_12_P117802	NM_001047469	F13E9.13	-3.1101	5.13526e-05	0.00786782
A_12_P119733	NM_068099	scrm-5	-3.10994	5.2795e-05	0.00801371
A_12_P147120	NM_065400	Y1A5A.1	-3.10895	3.82988e-05	0.00654472
A_12_P104593	NM_071117	T10B5.10	-3.10718	1.09214e-05	0.00321717
A_12_P119633	NM_067855	Y54G2A.13	-3.10374	3.9564e-05	0.00669131
A_12_P154407	NM_001083172	H38K22.6	-3.10278	0.000159829	0.0170277
A_12_P115439	NM_058782	Y47G6A.3	-3.10224	3.969e-06	0.00193169
A_12_P114345	NM_059834	T02E1.7	-3.09892	8.48361e-05	0.0109824
A_12_P105201	NM_069255	F56D5.2	-3.09767	0.000296733	0.0267227
A_12_P112390	NM_069071	F42A9.7	-3.09749	0.000202307	0.0202681
A_12_P113965	NM_060957	C01A2.2	-3.09702	2.75274e-08	0.000125684
A_12_P103312	NM_069431	C04G2.2	-3.09581	0.000422926	0.0345432
A_12_P113955	NM_001028211	aat-4	-3.09387	1.15227e-08	9.40655e-05
A_12_P110521	NM_062746	K05F1.1	-3.09362	6.85913e-05	0.00954934
A_12_P169469	NM_072934	R03H4.6	-3.0916	1.16733e-05	0.00332114
A_12_P106828	NM_001129375	C14A6.13	-3.09024	3.93695e-06	0.00192614
A_12_P109668	NM_075287	cyp-42A1	-3.08999	4.11873e-06	0.00196445
A_12_P103560	NM_064679	Y53F4A.2	-3.0892	4.21001e-05	0.006973
A_12_P114674	NM_065488	R07E5.15	-3.08908	2.09953e-05	0.00457415
A_12_P112756	NM_063464	K08F8.5	-3.08862	9.27035e-07	0.000868257
A_12_P106697	NM_058644	W03D8.10	-3.08784	3.03983e-05	0.00569605
A_12_P114644	NM_075345	F21D9.3	-3.08727	0.000398307	0.0330791
A_12_P111411	NM_059512	ZC581.7	-3.08621	8.11714e-05	0.0106699
A_12_P106010	NM_068474	spe-27	-3.08574	5.46304e-05	0.00819489
A_12_P175674	NM_171687	C25F6.7	-3.08457	1.26252e-05	0.00346768
A_12_P101797	NM_001029242	nas-37	-3.08358	8.60475e-05	0.0110807
A_12_P172638	NM_076164	K09C4.5	-3.08342	0.000425699	0.0347047
A_12_P179249	NM_070660	ZK550.5	-3.08272	2.70892e-05	0.00529604
A_12_P107697	NM_071029	C38C3.3	-3.08167	5.23079e-05	0.00796134
A_12_P108776	NM_061582	math-45	-3.08034	0.000198589	0.019985
A_12_P142725	NM_068411	Y4C6A.1	-3.07979	2.35396e-05	0.00488592
A_12_P118256	NM_068413	Y52D5A.1	-3.0775	1.87138e-05	0.00429739
A_12_P157375	NM_001026813	C25H3.16	-3.07606	2.81774e-05	0.00545712
A_12_P103663	NM_065731	T15B12.2	-3.07577	4.28261e-05	0.0070575
A_12_P113937	NM_070043	M02B1.4	-3.07459	9.64901e-05	0.0119358
A_12_P100700	NM_066449	ZK353.4	-3.07398	0.000141803	0.0156336
A_12_P142211	NM_068581	Y73B6BL.24	-3.07251	5.2505e-09	8.24066e-05
A_12_P104546	NM_064021	rmd-3	-3.07248	2.59624e-05	0.00516582
A_12_P163273	NM_171348	C55C3.6	-3.07192	4.65719e-05	0.00741927
A_12_P116497	NM_065400	Y1A5A.1	-3.07173	5.15107e-05	0.00788062
A_12_P132792	NM_059987	F36A2.12	-3.07073	2.40432e-05	0.00494701
A_12_P109234	NM_059459	K06A5.3	-3.06732	1.63544e-05	0.00400316
A_12_P109949	NM_060643	F58D5.7	-3.06557	3.32473e-06	0.00177973
A_12_P108396	NM_058367	Y18H1A.10	-3.06357	0.000152378	0.0164573
A_12_P106461	NM_071169	F36F12.7	-3.06334	7.23485e-05	0.00986283
A_12_P110815	NM_060489	scrm-6	-3.06301	0.000171824	0.0179689
A_12_P117719	NM_064668	W01D2.3	-3.06274	8.04546e-05	0.0106112
A_12_P102662	NM_077199	C07B5.2	-3.06073	2.82292e-05	0.00546446
A_12_P116031	NM_072169	Y38A10A.2	-3.06061	5.19745e-05	0.00792288
A_12_P140190	NM_001129209	C29E4.15	-3.06057	1.84083e-07	0.000328317
A_12_P113091	NM_072241	fbxa-196	-3.06033	9.40384e-06	0.0029566
A_12_P118776	NM_060642	F58D5.8	-3.06	6.40139e-05	0.00915644
A_12_P103662	NM_001027318	hhat-1	-3.05548	8.84667e-05	0.0112702
A_12_P100506	NM_059096	F54C1.8	-3.05391	0.000145258	0.0159072
A_12_P154115	NM_058875	F47B3.2	-3.05181	0.000631592	0.0466787
A_12_P136157	NM_001027012	F49C5.11	-3.05129	1.3445e-08	9.5918e-05
A_12_P136159	NM_001027012	F49C5.11	-3.05067	1.74993e-08	0.000104456
A_12_P114459	NM_074208	Y40H4A.2	-3.04766	1.14572e-05	0.00329259
A_12_P116526	NM_061081	C49A1.3	-3.04713	1.90743e-05	0.00434627
A_12_P137490	NM_069799	ZK809.1	-3.04377	5.89208e-06	0.0023156
A_12_P161533	NM_060493	F36D1.6	-3.04291	4.8292e-05	0.00760072
A_12_P116107	NM_070505	Y105C5B.17	-3.04258	5.04876e-06	0.00216267
A_12_P115877	NM_059097	sst-20	-3.04198	3.04978e-05	0.0057014
A_12_P114713	NM_074464	F21A3.4	-3.03883	6.86636e-05	0.00955387
A_12_P142741	NM_001027699	Y43F4A.1	-3.03523	0.000208264	0.0207213
A_12_P101245	NM_068445	C55C3.4	-3.03384	3.3069e-05	0.00596024
A_12_P110511	NM_074173	F23B12.1	-3.03327	3.77228e-05	0.00649473
A_12_P159956	NM_058279	spe-8	-3.03267	8.00991e-05	0.010575
A_12_P175677	NM_171687	C25F6.7	-3.03227	8.57319e-06	0.00282207
A_12_P136156	NM_001027012	F49C5.11	-3.03139	9.98037e-09	9.12813e-05
A_12_P170414	NM_066114	pqn-46	-3.03068	0.000460418	0.0368537
A_12_P136158	NM_001027012	F49C5.11	-3.02961	1.05411e-07	0.000251643
A_12_P115570	NM_060053	F25H5.7	-3.0295	6.59221e-06	0.00246815
A_12_P131555	NM_068711	ZC477.7	-3.02734	0.000114827	0.0135504
A_12_P136155	NM_001027012	F49C5.11	-3.02563	5.09151e-08	0.000177946
A_12_P101016	NM_063605	Y51B9A.5	-3.02358	1.55323e-05	0.00388612
A_12_P112015	NM_062896	K06A1.2	-3.02272	2.20571e-05	0.00470355
A_12_P116831	NM_059558	H27M09.5	-3.01955	9.51359e-05	0.0118107
A_12_P132562	NM_001026289	F36H2.4	-3.01858	0.000143544	0.0157724
A_12_P104170	NM_063123	C30G12.1	-3.01726	0.000408948	0.0336859
A_12_P150940	NM_058618	F40E3.5	-3.01652	1.99365e-05	0.00443491
A_12_P101702	NM_068711	ZC477.7	-3.0156	9.43718e-05	0.0117602
A_12_P111900	NM_067993	Y37E11AL.4	-3.01501	4.74757e-05	0.00752353
A_12_P115740	NM_070660	ZK550.5	-3.01243	2.24615e-05	0.00475883
A_12_P106458	NM_062065	Y27F2A.6	-3.01201	2.52375e-05	0.00508346
A_12_P108386	NM_067471	Y38C1AA.7	-3.01197	3.60751e-05	0.00631072
A_12_P141975	NM_075147	C14A6.5	-3.0113	8.62885e-05	0.0110899
A_12_P106130	NM_069138	tag-19	-3.00821	1.47919e-05	0.00379097
A_12_P115954	NM_059369	F56F4.3	-3.00807	0.000295763	0.0266536
A_12_P106381	NM_075737	T19D7.6	-3.00766	0.000259305	0.0242077
A_12_P139105	NM_001028967	T13F3.8	-3.00724	4.69217e-05	0.0074508
A_12_P120120	NM_001026184	C01G10.15	-3.00709	0.000227168	0.0220242
A_12_P157376	NM_001026813	C25H3.16	-3.00699	0.000121224	0.0140351
A_12_P107044	NM_072630	F40A3.2	-3.00653	2.87957e-07	0.000424763
A_12_P115325	NM_058644	W03D8.10	-3.00649	3.08504e-05	0.00574187
A_12_P114202	NM_001026280	F36A2.14	-3.00554	3.97319e-06	0.00193169
A_12_P109445	NM_061392	T02H6.4	-3.00527	0.000232052	0.0223494
A_12_P112435	NM_075854	fbxa-190	-3.00395	2.57122e-08	0.000125516
A_12_P143602	NM_074222	C47E8.1	-3.00117	1.47239e-05	0.00378591
A_12_P117765	NM_076385	C05E11.7	-3.00064	0.000111189	0.0132519
A_12_P119097	NM_061855	F16G10.5	-3.00028	0.000200687	0.0201444
A_12_P104451	NM_060553	F15D3.8	-3.00022	1.24188e-07	0.000266275
A_12_P137160	NM_059511	ZC581.2	-2.99936	0.00012274	0.0141606
A_12_P137866	NM_069850	pph-2	-2.99689	6.64964e-06	0.00248254
A_12_P100567	NM_060534	K08C9.2	-2.99599	1.5162e-05	0.00383572
A_12_P114548	NM_075163	F16H6.9	-2.99371	2.35011e-05	0.00488414
A_12_P152894	NM_001027314	Y57G7A.3	-2.99296	1.25267e-05	0.00345894
A_12_P172753	NM_063892	cutl-9	-2.99217	3.55511e-05	0.00625251
A_12_P150318	NM_001027012	F49C5.11	-2.98939	1.97322e-07	0.000342586
A_12_P115466	NM_067308	F54F12.1	-2.98468	5.46071e-06	0.00225366
A_12_P106912	NM_069290	elo-7	-2.98385	7.51298e-06	0.00265455
A_12_P151081	NM_069290	elo-7	-2.98307	4.6174e-06	0.0020683
A_12_P117229	NM_068137	lgc-22	-2.98265	1.04835e-05	0.0031281
A_12_P113487	NM_061416	F46F5.11	-2.98208	5.99941e-05	0.00877054
A_12_P180463	NM_058623	F32B5.4	-2.98202	0.000347412	0.0300321
A_12_P114780	NM_067540	W03G1.2	-2.97756	1.32795e-05	0.00355669
A_12_P132793	NM_059987	F36A2.12	-2.97516	1.31846e-05	0.00354571
A_12_P114671	NM_069627	ZK596.2	-2.97471	0.000303031	0.0271279
A_12_P101080	NM_069392	kin-5	-2.97268	2.93132e-05	0.00557796
A_12_P172756	NM_063892	cutl-9	-2.97184	2.55539e-05	0.00511829
A_12_P113288	NM_068374	ZK354.8	-2.97152	0.00023323	0.0223969
A_12_P100559	NM_060392	C34B2.4	-2.9703	6.54393e-05	0.00928308
A_12_P104564	NM_074136	F40G12.10	-2.96974	1.96979e-05	0.0044115
A_12_P103781	NM_072604	grl-10	-2.96961	5.48068e-05	0.00821336
A_12_P105348	NM_067458	scl-23	-2.96944	0.00011487	0.0135515
A_12_P105783	NM_062840	C30B5.5	-2.96903	2.93953e-05	0.00558547
A_12_P107698	NM_072187	W06H8.4	-2.9653	0.000320415	0.0282714
A_12_P109985	NM_069874	spe-17	-2.96525	1.97913e-05	0.00442736
A_12_P150317	NM_001027012	F49C5.11	-2.96524	3.90288e-08	0.000155743
A_12_P110694	NM_068128	F36A4.1	-2.96329	3.19205e-05	0.00583636
A_12_P144290	NM_001026563	Y18H1A.15	-2.96324	5.128e-05	0.00786376
A_12_P150319	NM_001027012	F49C5.11	-2.96274	2.75079e-07	0.000408841
A_12_P173227	NM_066238	Y69F12A.1	-2.96182	5.71689e-05	0.00843962
A_12_P107756	NM_065507	F56F3.4	-2.95985	3.13353e-05	0.00578869
A_12_P135350	NM_001047614	C02G6.3	-2.95785	6.02021e-06	0.00234111
A_12_P119895	NM_065555	clec-155	-2.95706	2.69775e-05	0.00528209
A_12_P162933	NM_067505	F18F11.4	-2.95641	1.03918e-07	0.000250152
A_12_P113425	NM_001027270	Y46G5A.34	-2.95384	4.51981e-05	0.00727424
A_12_P117434	NM_060352	F59C6.2	-2.95157	3.17521e-05	0.00583273
A_12_P155375	NM_058643	W03D8.9	-2.9488	1.99459e-05	0.00443491
A_12_P104030	NM_074608	F36G9.13	-2.94772	0.00044633	0.0359607
A_12_P148146	NM_070094	F49E11.2	-2.94768	2.36086e-05	0.00488975
A_12_P105905	NM_069137	C09G9.3	-2.94688	0.000293666	0.0265134
A_12_P147156	NM_001028302	Y45F10D.16	-2.94455	6.77565e-05	0.00948482
A_12_P101907	NM_069850	pph-2	-2.94351	1.18955e-05	0.00334829
A_12_P113085	NM_063891	C14A4.13	-2.94344	4.10287e-05	0.00685049
A_12_P149724	NM_069390	spe-29	-2.94227	0.000378348	0.0319051
A_12_P112638	NM_060391	fkb-7	-2.94162	2.33242e-06	0.00146257
A_12_P104797	NM_059516	C17F3.3	-2.94153	0.000670491	0.0486922
A_12_P102322	NM_063684	cyp-13A10	-2.9415	1.10087e-09	4.31954e-05
A_12_P118449	NM_061536	Y57G7A.5	-2.94069	1.87174e-05	0.00429739
A_12_P148145	NM_070094	F49E11.2	-2.93828	3.10768e-05	0.00576537
A_12_P151776	NM_001026796	C17F4.12	-2.93826	0.000267349	0.0247001
A_12_P111851	NM_001268153	T21C12.8	-2.93634	6.55489e-06	0.00246815
A_12_P118016	NM_075557	Y38H6C.15	-2.93612	6.41537e-05	0.00915916
A_12_P150316	NM_001027012	F49C5.11	-2.93359	2.25522e-07	0.000361181
A_12_P115404	NM_058862	T20F5.4	-2.93105	3.85172e-05	0.00656239
A_12_P102126	NM_059629	M05B5.1	-2.92913	0.00011579	0.0136235
A_12_P175675	NM_171687	C25F6.7	-2.9282	2.7232e-06	0.00160438
A_12_P116993	NM_068581	Y73B6BL.24	-2.9194	3.91802e-08	0.000155743
A_12_P101280	NM_061369	W04H10.1	-2.91412	0.000214407	0.0211909
A_12_P111989	NM_059733	F26A3.5	-2.91334	5.07154e-05	0.00780983
A_12_P117818	NM_075426	W04E12.4	-2.91329	8.7111e-06	0.00284125
A_12_P116397	NM_066238	Y69F12A.1	-2.91062	2.89726e-05	0.00554002
A_12_P101282	NM_065228	H34I24.1	-2.90979	0.000267972	0.0247193
A_12_P156256	NM_060674	R05D7.2	-2.90857	0.000126285	0.0143955
A_12_P146515	NM_066907	D2045.5	-2.90736	0.000233891	0.0224349
A_12_P115108	NM_063639	sfxn-1.1	-2.90301	0.000354285	0.0304798
A_12_P105093	NM_063175	ZK1290.7	-2.90238	3.19431e-06	0.00174564
A_12_P108558	NM_060493	F36D1.6	-2.90212	7.32283e-05	0.00992503
A_12_P172173	NM_058381	ZC123.1	-2.90171	0.000237185	0.0226989
A_12_P110492	NM_069619	F13E9.5	-2.90131	0.000426996	0.0347815
A_12_P108524	NM_063668	T15H9.4	-2.89944	9.89969e-05	0.0121463
A_12_P156675	NM_060053	F25H5.7	-2.89777	2.91088e-06	0.00166011
A_12_P133845	NM_063388	M05D6.3	-2.89641	1.19519e-05	0.00336174
A_12_P108493	NM_063335	F35C11.2	-2.89536	1.13944e-05	0.00328018
A_12_P115814	NM_070237	Y45F10C.1	-2.89461	7.30876e-05	0.00991672
A_12_P150315	NM_001027012	F49C5.11	-2.89436	1.69661e-07	0.000313685
A_12_P143490	NM_068682	C25A8.2	-2.89363	4.38582e-05	0.00714653
A_12_P111510	NM_066912	F43D9.1	-2.89219	2.24379e-07	0.000360822
A_12_P114570	NM_073292	C35A5.4	-2.8917	8.4257e-05	0.0109327
A_12_P172172	NM_058381	ZC123.1	-2.88869	9.47625e-05	0.011789
A_12_P103750	NM_060706	F56H6.6	-2.88839	5.30254e-05	0.00803372
A_12_P177724	NM_171577	Y39B6A.30	-2.88447	5.2942e-05	0.00802689
A_12_P114615	NM_073235	C12D8.9	-2.88435	0.000140121	0.0155182
A_12_P145750	NM_001038301	ZK783.6	-2.88296	5.41527e-05	0.00815355
A_12_P119171	NM_077797	K08H2.5	-2.88117	2.49181e-05	0.00504675
A_12_P110983	NM_073272	F15H10.8	-2.87725	0.000554259	0.042252
A_12_P132210	NM_001026905	F11G11.14	-2.87697	5.5106e-05	0.00824961
A_12_P108599	NM_058457	F47G6.3	-2.87642	8.40284e-05	0.0109141
A_12_P113727	NM_067379	tag-164	-2.87629	0.000195116	0.0197062
A_12_P110400	NM_069409	F44D12.4	-2.8761	1.93606e-05	0.00438528
A_12_P119020	NM_001129217	C45G9.15	-2.87246	4.12736e-05	0.0068826
A_12_P114465	NM_065719	C34E10.9	-2.87142	0.000208586	0.0207357
A_12_P107028	NM_064816	Y55B1AR.4	-2.87129	2.15535e-05	0.00463511
A_12_P118072	NM_065250	cutl-25	-2.87094	1.91375e-05	0.0043543
A_12_P104483	NM_073042	F07D3.3	-2.86506	6.36362e-05	0.00912579
A_12_P100258	NM_062263	F54D10.9	-2.86457	0.000333848	0.0291745
A_12_P105314	NM_064355	lips-9	-2.86396	0.000156415	0.0167641
A_12_P172176	NM_058381	ZC123.1	-2.86262	0.000672831	0.048817
A_12_P135116	NM_001026131	C06A6.7	-2.86241	8.44248e-05	0.0109436
A_12_P146606	NM_060033	W06D4.2	-2.86187	1.13816e-05	0.00328018
A_12_P165733	NM_058877	F47B3.1	-2.86011	0.000226667	0.0219873
A_12_P114051	NM_059072	F21F3.3	-2.85917	5.19456e-05	0.00792155
A_12_P155328	NM_074253	nspa-8	-2.85854	0.000347158	0.0300321
A_12_P173393	NM_063211	F18A1.1	-2.85681	0.00030721	0.0273849
A_12_P105826	NM_059509	try-7	-2.85378	0.000408385	0.0336719
A_12_P115680	NM_060033	W06D4.2	-2.85206	4.67188e-05	0.00743535
A_12_P103680	NM_065649	C26E6.1	-2.85118	5.01001e-05	0.00777406
A_12_P152891	NM_001027314	Y57G7A.3	-2.84969	0.000122677	0.0141574
A_12_P113656	NM_077870	F54B11.10	-2.8478	6.94394e-05	0.00961408
A_12_P116229	NM_061078	ZK849.4	-2.84778	3.9984e-05	0.00673915
A_12_P152615	NM_001129581	Y51A2B.9	-2.84669	0.000305046	0.02724
A_12_P157415	NM_059419	C10G11.1	-2.84361	0.000501033	0.039295
A_12_P110793	NM_060447	F49D11.7	-2.84102	0.000308844	0.0274978
A_12_P180489	NM_058822	C32E8.1	-2.8395	8.14776e-06	0.00275364
A_12_P178059	NM_063182	fbxa-224	-2.8365	5.36642e-05	0.008101
A_12_P106298	NM_064703	Y53F4B.19	-2.83539	0.000123399	0.0142115
A_12_P114425	NM_171952	C25F6.7	-2.83434	3.12325e-06	0.00172604
A_12_P147718	NM_074763	T08G3.7	-2.83397	0.000136594	0.0152489
A_12_P115869	NM_066024	wht-6	-2.83194	0.000102481	0.0124531
A_12_P146204	NM_077081	M02D8.2	-2.83113	0.000450551	0.0362116
A_12_P174792	NM_060016	fasn-1	-2.83058	2.27066e-06	0.00144635
A_12_P118792	NM_073055	C50F4.10	-2.83041	8.83722e-05	0.0112691
A_12_P142740	NM_001027699	Y43F4A.1	-2.82966	0.000240757	0.0229553
A_12_P116539	NM_076216	T27A10.6	-2.82417	0.000409813	0.0337413
A_12_P175388	NM_001028575	D1054.9	-2.8219	1.40336e-05	0.00368569
A_12_P172754	NM_063892	cutl-9	-2.82055	7.41628e-06	0.00263584
A_12_P149282	NM_001038274	F47D12.10	-2.82014	8.90595e-06	0.00287848
A_12_P118930	NM_059686	C15A11.2	-2.81848	0.000127106	0.0144571
A_12_P118691	NM_070166	W02A2.8	-2.81457	0.000268083	0.0247193
A_12_P152250	NM_058644	W03D8.10	-2.81371	8.82667e-05	0.0112649
A_12_P118367	NM_077803	cyp-14A2	-2.8116	0.000107382	0.0129206
A_12_P119056	NM_059878	F02E9.3	-2.81087	0.000566886	0.0429074
A_12_P107875	NM_068323	AC7.3	-2.80933	1.21212e-05	0.00339234
A_12_P146203	NM_077081	M02D8.2	-2.80892	0.000525727	0.0406707
A_12_P100319	NM_069713	F54D1.1	-2.80785	0.000330697	0.028996
A_12_P112001	NM_071809	F13A2.4	-2.80669	4.90516e-05	0.0076768
A_12_P117606	NM_072702	F20D6.6	-2.80644	0.000142397	0.0156827
A_12_P114477	NM_069980	C25G4.7	-2.80477	5.02356e-05	0.00777562
A_12_P113720	NM_068361	F36H12.14	-2.80456	2.18748e-05	0.00468097
A_12_P146200	NM_077081	M02D8.2	-2.80101	0.00022355	0.0217927
A_12_P102836	NM_001028170	R11A8.8	-2.79791	0.000109436	0.0130955
A_12_P116716	NM_066847	ZK1128.3	-2.79523	1.04103e-05	0.00311203
A_12_P138825	NM_064469	fbxa-168	-2.79449	0.000193016	0.0195696
A_12_P173437	NM_066828	T16G12.7	-2.79424	4.08315e-05	0.00683793
A_12_P120294	NM_001027079	dhs-8	-2.79383	6.1546e-08	0.00019015
A_12_P110288	NM_066614	ZK507.1	-2.79334	4.45018e-06	0.00205636
A_12_P115041	NM_075154	clec-245	-2.79046	7.07201e-07	0.000741947
A_12_P113034	NM_063017	B0252.5	-2.79044	1.99248e-05	0.00443491
A_12_P100469	NM_063949	F44F4.10	-2.78934	2.98009e-05	0.00563646
A_12_P145421	NM_067311	Y39E4B.13	-2.78875	4.68531e-05	0.00744592
A_12_P168904	NM_066437	ZC262.1	-2.78832	0.000295392	0.0266427
A_12_P102137	NM_059893	F10D11.5	-2.78674	7.61282e-05	0.0102018
A_12_P106711	NM_069506	Y43C5B.2	-2.78548	6.97013e-05	0.00963334
A_12_P173123	NM_060692	oac-27	-2.78506	0.000313524	0.0277507
A_12_P108485	NM_069841	F38H4.6	-2.78286	2.60992e-05	0.00517613
A_12_P108334	NM_068984	K07H8.7	-2.78253	0.000265487	0.0245801
A_12_P177255	NM_067068	Y47D3B.4	-2.78169	2.7742e-06	0.00161906
A_12_P150272	NM_001026339	F56G4.7	-2.77933	2.50689e-05	0.0050627
A_12_P102065	NM_066935	Y39A1A.2	-2.77707	3.35766e-05	0.00601794
A_12_P107687	NM_071968	ugt-63	-2.77705	1.40724e-06	0.00112001
A_12_P138381	NM_001026877	D1022.9	-2.77639	0.000140941	0.015578
A_12_P107412	NM_059503	tsp-19	-2.77434	4.5677e-05	0.00731531
A_12_P113484	NM_059661	F13G3.3	-2.77389	1.7499e-06	0.00124075
A_12_P120345	NM_059367	F56F4.4	-2.76926	5.36113e-05	0.0080969
A_12_P155515	NM_067498	T21D12.7	-2.76843	0.000177991	0.0184516
A_12_P111460	NM_058267	Y48G1C.5	-2.76737	7.54979e-05	0.010145
A_12_P110183	NM_063182	fbxa-224	-2.7673	0.000119204	0.0138832
A_12_P113494	NM_061805	C33C12.7	-2.7666	0.000112192	0.0133236
A_12_P112604	NM_061414	F46F5.4	-2.76583	3.46799e-05	0.00614335
A_12_P173643	NM_067090	Y66D12A.11	-2.76424	0.000220961	0.0216263
A_12_P104753	NM_066227	numr-2	-2.76275	2.82714e-05	0.00546991
A_12_P151056	NM_069759	F22B3.8	-2.75893	0.000335819	0.0293141
A_12_P101034	NM_059033	C10H11.7	-2.75888	3.01378e-05	0.00565264
A_12_P103736	NM_066828	T16G12.7	-2.75845	4.07058e-05	0.00682853
A_12_P177726	NM_171577	Y39B6A.30	-2.75525	9.15915e-05	0.0115297
A_12_P104831	NM_001027699	Y43F4A.1	-2.75399	0.000153594	0.0165431
A_12_P156255	NM_060674	R05D7.2	-2.7539	1.69828e-05	0.00408818
A_12_P149284	NM_001038274	F47D12.10	-2.75296	1.01885e-06	0.000918308
A_12_P147831	NM_181961	R148.5	-2.75189	0.00010283	0.0124761
A_12_P117390	NM_069483	Y43C5A.3	-2.75052	5.82395e-05	0.00856706
A_12_P106710	NM_060826	T06G6.8	-2.74836	4.93727e-05	0.00769502
A_12_P147830	NM_181961	R148.5	-2.74659	0.00012067	0.0139959
A_12_P134385	NM_070623	Y116A8C.24	-2.7465	2.40803e-06	0.00148329
A_12_P108780	NM_064607	cysl-2	-2.74616	3.42127e-07	0.000474354
A_12_P139574	NM_069592	T25B9.5	-2.74419	1.64374e-05	0.00401138
A_12_P115540	NM_073825	ttr-28	-2.74239	0.000447166	0.0360059
A_12_P100310	NM_066869	R01H10.4	-2.7423	0.000212053	0.0210165
A_12_P147834	NM_181961	R148.5	-2.74092	9.22911e-05	0.0116005
A_12_P106739	NM_063401	W01C9.1	-2.74067	3.72036e-06	0.00187391
A_12_P133634	NM_065549	T23F11.2	-2.73908	4.60559e-05	0.00735655
A_12_P116841	NM_070623	Y116A8C.24	-2.73855	3.28232e-05	0.00593229
A_12_P172755	NM_063892	cutl-9	-2.73696	4.76414e-06	0.00209097
A_12_P103462	NM_064379	Y81G3A.1	-2.73626	4.50851e-05	0.00726614
A_12_P114423	NM_001027828	ZK418.2	-2.73607	8.07448e-06	0.00273831
A_12_P109554	NM_074239	Y50E8A.6	-2.7348	5.74344e-05	0.00846259
A_12_P130925	NM_001026390	K07A3.3	-2.73332	0.000388016	0.0324969
A_12_P117582	NM_064100	F13D12.9	-2.73036	0.000187066	0.0191146
A_12_P137235	NM_068712	ssq-3	-2.72705	6.47472e-05	0.00921479
A_12_P172174	NM_058381	ZC123.1	-2.72521	0.000641045	0.047156
A_12_P115642	NM_069518	spe-26	-2.72365	0.000117127	0.0137351
A_12_P151080	NM_069290	elo-7	-2.72201	9.12051e-06	0.00290681
A_12_P113377	NM_070676	snf-9	-2.72191	5.21058e-05	0.0079371
A_12_P102295	NM_068680	C25A8.5	-2.72031	1.63331e-05	0.00400043
A_12_P116601	NM_066615	ZK507.3	-2.71739	2.25671e-06	0.0014398
A_12_P172948	NM_068661	T22D1.8	-2.71385	1.36526e-05	0.00361223
A_12_P146605	NM_060033	W06D4.2	-2.71049	2.4313e-05	0.00497823
A_12_P115580	NM_065678	C45G9.12	-2.71032	3.1933e-06	0.00174564
A_12_P172923	NM_067322	Y39E4B.11	-2.70818	1.87943e-05	0.00430748
A_12_P109207	NM_074138	F14D7.1	-2.70652	1.70412e-05	0.00409464
A_12_P179325	NM_063668	T15H9.4	-2.70571	0.000140635	0.0155573
A_12_P139434	NM_068552	T13A10.1	-2.70326	1.17364e-05	0.00332736
A_12_P136540	NM_001047432	ZK688.12	-2.70031	6.68643e-05	0.00941574
A_12_P114434	NM_067722	K08D12.5	-2.70009	1.03949e-06	0.000931206
A_12_P116061	NM_061260	C50D2.3	-2.69948	4.38947e-05	0.00714655
A_12_P119438	NM_058477	Y71G12B.22	-2.69836	0.000524747	0.040643
A_12_P113441	NM_059089	W03G9.5	-2.69689	0.000542045	0.0415286
A_12_P146202	NM_077081	M02D8.2	-2.69664	0.000563382	0.0427246
A_12_P109179	NM_065084	R155.3	-2.69516	0.000494473	0.038866
A_12_P162953	NM_066032	F23F12.3	-2.6951	0.000178674	0.0184949
A_12_P112320	NM_058575	F23C8.8	-2.6949	1.68402e-05	0.00406874
A_12_P103732	NM_072965	F21C10.4	-2.69458	1.30038e-05	0.00351627
A_12_P176596	NM_068374	ZK354.8	-2.69418	0.000215583	0.0212376
A_12_P101856	NM_068552	T13A10.1	-2.69118	5.03154e-05	0.00778183
A_12_P102484	NM_062469	C33F10.12	-2.68988	1.50135e-05	0.00381757
A_12_P105384	NM_064710	Y53F4B.25	-2.68968	0.000375513	0.0317342
A_12_P147832	NM_181961	R148.5	-2.68883	0.000112034	0.013314
A_12_P100082	NM_060426	C35E7.10	-2.68867	0.000544411	0.0416888
A_12_P153158	NM_074266	ZC412.9	-2.68835	1.8317e-05	0.00426284
A_12_P162532	NM_001047371	B0280.17	-2.6859	0.000187274	0.0191259
A_12_P115689	NM_001129436	F11A5.5	-2.68405	0.000418493	0.0342667
A_12_P149175	NM_001026989	F42G2.7	-2.68275	2.98124e-05	0.00563646
A_12_P153155	NM_074266	ZC412.9	-2.68209	9.56227e-05	0.0118434
A_12_P135117	NM_001026131	C06A6.7	-2.68149	8.57992e-05	0.0110711
A_12_P105561	NM_078248	ifa-3	-2.68107	7.22305e-07	0.000751172
A_12_P177729	NM_067303	cyp-13A11	-2.68093	4.3058e-07	0.000544231
A_12_P171568	NM_069483	Y43C5A.3	-2.67906	4.60657e-05	0.00735655
A_12_P119304	NM_065050	Y22D7AR.12	-2.67882	7.23672e-05	0.00986283
A_12_P154500	NM_064721	Y53F4B.36	-2.67861	0.000388852	0.032553
A_12_P115460	NM_060193	F26E4.5	-2.67795	0.000126186	0.0143955
A_12_P114834	NM_074635	F14H3.2	-2.67739	2.8479e-05	0.00549445
A_12_P153159	NM_074266	ZC412.9	-2.67675	0.000117335	0.0137472
A_12_P111090	NM_062368	H20J04.1	-2.67655	1.10965e-05	0.00324027
A_12_P160055	NM_070223	Y45F10B.9	-2.67626	0.000431579	0.0350675
A_12_P108457	NM_062777	tsp-18	-2.67464	8.07442e-05	0.010628
A_12_P173544	NM_066614	ZK507.1	-2.67284	2.72186e-06	0.00160438
A_12_P132563	NM_001026289	F36H2.4	-2.67281	0.000215453	0.0212376
A_12_P137542	NM_065374	cyp-25A1	-2.67141	0.000398067	0.0330704
A_12_P118479	NM_068030	oac-23	-2.66985	5.69946e-05	0.00842625
A_12_P106598	NM_171066	T22F7.5	-2.66956	0.000146038	0.0159704
A_12_P150955	NM_065572	twk-6	-2.66886	5.27816e-06	0.00221737
A_12_P105956	NM_068954	F42G8.9	-2.66842	0.00012226	0.0141241
A_12_P172637	NM_076164	K09C4.5	-2.66833	2.67639e-05	0.00526126
A_12_P167974	NM_069411	F44D12.6	-2.66575	0.000141381	0.0156008
A_12_P101582	NM_067303	cyp-13A12	-2.6635	5.33561e-07	0.000626814
A_12_P110433	NM_072125	F26F12.2	-2.66169	3.13624e-06	0.00172943
A_12_P116188	NM_067750	Y76B12C.4	-2.66145	0.000168511	0.0176898
A_12_P108057	NM_068902	C06A6.5	-2.66124	1.30567e-06	0.00106386
A_12_P130992	NM_066925	T21C12.4	-2.65748	8.9889e-05	0.0113682
A_12_P118789	NM_076164	K09C4.5	-2.65706	8.58991e-07	0.000834034
A_12_P114041	NM_058673	Y71F9AL.2	-2.65623	3.1176e-05	0.0057747
A_12_P112379	NM_072247	cpt-6	-2.65439	8.94787e-05	0.0113475
A_12_P101640	NM_072012	Y49G5A.1	-2.65373	0.000305447	0.0272634
A_12_P115065	NM_001028490	C15H11.10	-2.6523	0.00040832	0.0336719
A_12_P146345	NM_074191	R02D5.7	-2.65083	0.000100085	0.0122416
A_12_P109426	NM_067273	Y37D8A.8	-2.65026	6.62864e-05	0.00935918
A_12_P105391	NM_065361	attf-1	-2.6494	1.52113e-05	0.00383828
A_12_P116328	NM_061604	bath-26	-2.64727	4.20853e-05	0.006973
A_12_P144585	NM_001029111	sfxn-1.3	-2.64716	0.000443567	0.0358412
A_12_P137921	NM_001026824	C27D6.11	-2.64666	0.000129988	0.0146902
A_12_P115089	NM_071031	C38C3.7	-2.64658	0.000138525	0.0153934
A_12_P177725	NM_171577	Y39B6A.30	-2.64462	0.000124339	0.0142946
A_12_P135351	NM_001047614	C02G6.3	-2.6445	3.61783e-05	0.00632315
A_12_P147833	NM_181961	R148.5	-2.64419	0.000148333	0.0161583
A_12_P149283	NM_001038274	F47D12.10	-2.64265	6.6365e-06	0.00248
A_12_P116043	NM_060020	F32H2.6	-2.64062	4.03931e-06	0.00194269
A_12_P107095	NM_071128	Y32G9A.3	-2.63734	2.13259e-05	0.00461307
A_12_P152890	NM_001027314	Y57G7A.3	-2.63507	0.000458771	0.0367518
A_12_P117685	NM_077923	F48F7.3	-2.63127	0.000668458	0.0485733
A_12_P136541	NM_001047432	ZK688.12	-2.62683	5.34406e-05	0.00807733
A_12_P136035	NM_064100	F13D12.9	-2.62668	0.000190677	0.0194028
A_12_P114236	NM_070105	scl-5	-2.6261	1.54239e-05	0.003872
A_12_P135962	NM_067304	cyp-13A12	-2.62589	8.89778e-06	0.00287821
A_12_P150271	NM_001026339	F56G4.7	-2.62177	0.000313291	0.0277426
A_12_P118156	NM_074191	R02D5.7	-2.61967	0.000120075	0.0139477
A_12_P132135	NM_068361	F36H12.14	-2.61787	2.00699e-05	0.00444912
A_12_P179379	NM_066847	ZK1128.3	-2.61664	3.05425e-05	0.00570401
A_12_P105883	NM_067301	snf-7	-2.61616	3.7988e-06	0.00188592
A_12_P144002	NM_070105	scl-5	-2.61614	2.34627e-05	0.00487874
A_12_P149615	NM_058277	F53G12.8	-2.61611	0.000161597	0.0171694
A_12_P104231	NM_073608	C52E4.7	-2.61532	1.86226e-05	0.00429709
A_12_P101106	NM_181961	R148.5	-2.6145	0.000125803	0.0143831
A_12_P100200	NM_071155	Y40B10A.4	-2.61229	6.88255e-05	0.00956157
A_12_P116534	NM_065083	R155.2	-2.61195	3.66315e-05	0.00635478
A_12_P107951	NM_068674	ZK381.2	-2.60915	7.89113e-06	0.00271289
A_12_P111859	NM_071732	C49G7.1	-2.60742	6.70094e-05	0.00942396
A_12_P115161	NM_072981	C24B5.4	-2.60737	1.81563e-05	0.00425064
A_12_P112488	NM_062503	ZK546.4	-2.60593	7.1213e-05	0.00976317
A_12_P115543	NM_001026361	H32K16.2	-2.60413	7.53062e-09	8.69067e-05
A_12_P136036	NM_064100	F13D12.9	-2.60221	0.000298424	0.0268413
A_12_P107964	NM_001027504	mua-3	-2.60054	5.63762e-06	0.00228048
A_12_P108204	NM_073056	pfk-2	-2.59907	2.59437e-05	0.00516471
A_12_P135115	NM_001026131	C06A6.7	-2.59776	0.000137912	0.0153498
A_12_P161534	NM_060493	F36D1.6	-2.59601	0.000293457	0.0265006
A_12_P106146	NM_062396	cyp-23A1	-2.59521	2.32093e-05	0.00485554
A_12_P140284	NM_065654	C27F2.6	-2.59478	1.7989e-05	0.00423492
A_12_P110515	NM_068202	F29B9.7	-2.5945	0.00021491	0.0212139
A_12_P107991	NM_074266	ZC412.9	-2.59431	8.26169e-05	0.0108164
A_12_P107104	NM_058646	W03D8.8	-2.59419	8.785e-08	0.000232906
A_12_P173667	NM_069862	ZK829.1	-2.59373	7.45227e-06	0.00264145
A_12_P168025	NM_058646	W03D8.8	-2.59368	6.54582e-08	0.000196818
A_12_P171567	NM_069483	Y43C5A.3	-2.59081	1.72344e-05	0.00412019
A_12_P118505	NM_001028815	F56H9.6	-2.59016	0.000469287	0.0374871
A_12_P101780	NM_067113	pqn-84	-2.58937	8.2676e-05	0.0108205
A_12_P100712	NM_065572	twk-6	-2.58928	5.09272e-06	0.00216966
A_12_P113469	NM_069481	nspd-7	-2.58228	0.000454962	0.0364988
A_12_P165732	NM_058877	F47B3.1	-2.58102	0.000162775	0.0172531
A_12_P114599	NM_062772	F55C12.6	-2.58013	0.000214789	0.0212127
A_12_P110039	NM_068482	H04M03.11	-2.5769	4.63984e-05	0.00739764
A_12_P107309	NM_069334	C28D4.4	-2.57224	0.00038426	0.0322581
A_12_P140811	NM_001027489	K04C2.8	-2.57012	0.000151542	0.0163986
A_12_P106856	NM_068415	T11F8.4	-2.56884	7.75039e-05	0.0103473
A_12_P162954	NM_066032	F23F12.3	-2.56751	0.000263058	0.0244533
A_12_P172922	NM_067322	Y39E4B.11	-2.56666	1.45844e-05	0.00375496
A_12_P104758	NM_066907	D2045.5	-2.56655	0.000593043	0.0443313
A_12_P104177	NM_074120	ent-3	-2.56627	8.55114e-05	0.0110516
A_12_P115558	NM_069381	ssp-32	-2.56255	1.31665e-05	0.00354571
A_12_P132561	NM_001026289	F36H2.4	-2.56093	4.90742e-05	0.0076768
A_12_P102898	NM_171589	Y39B6A.18	-2.56059	3.11235e-05	0.00576859
A_12_P177674	NM_058491	Y71G12B.25	-2.56058	1.75183e-06	0.00124075
A_12_P105959	NM_077802	cyp-14A1	-2.56053	1.63629e-06	0.00120911
A_12_P137515	NM_070594	Y116A8A.7	-2.5602	0.000507394	0.0396512
A_12_P106595	NM_061254	C23H3.9	-2.55957	5.32516e-06	0.00222824
A_12_P114421	NM_076095	F53B3.6	-2.55765	3.46783e-06	0.0018151
A_12_P143785	NM_059472	C55B7.10	-2.55717	2.05444e-05	0.00451323
A_12_P117571	NM_069184	C01F6.2	-2.55458	0.000154567	0.0166102
A_12_P151950	NM_078247	mua-6	-2.55422	1.83547e-06	0.00127921
A_12_P139575	NM_001027139	fut-5	-2.55353	1.52788e-05	0.00385285
A_12_P172388	NM_065361	attf-1	-2.55342	2.26175e-05	0.00477212
A_12_P101229	NM_068629	Y73B6A.1	-2.55317	3.20364e-06	0.0017483
A_12_P177728	NM_171577	Y39B6A.30	-2.55274	4.36008e-05	0.00711641
A_12_P116129	NM_070007	K08E7.4	-2.55125	0.000119243	0.0138837
A_12_P107228	NM_067581	col-103	-2.55046	6.83494e-06	0.00251111
A_12_P112810	NM_076323	F48D6.4	-2.54954	4.60644e-06	0.0020683
A_12_P118113	NM_071065	Y46H3D.1	-2.54925	3.38574e-05	0.00604205
A_12_P148676	NM_001083221	F55B11.7	-2.54905	6.05949e-05	0.00883164
A_12_P149155	NM_001027372	F17C8.7	-2.54659	7.2658e-05	0.00989559
A_12_P108476	NM_064651	C09F9.1	-2.54348	0.000253967	0.023817
A_12_P148675	NM_001083221	F55B11.7	-2.54313	1.65975e-05	0.00403496
A_12_P100738	NM_068966	B0218.5	-2.54167	6.27195e-05	0.00903435
A_12_P110392	NM_059101	C46H11.6	-2.54133	0.000154598	0.0166102
A_12_P172238	NM_001027828	ZK418.2	-2.54088	6.32407e-05	0.00909607
A_12_P140781	NM_061532	clec-119	-2.53896	0.000278414	0.0254112
A_12_P177730	NM_067303	cyp-13A11	-2.53856	1.33401e-06	0.00108147
A_12_P144295	NM_068405	ZK616.7	-2.53775	6.17716e-05	0.00893098
A_12_P149430	NM_073705	K01D12.7	-2.53443	6.0575e-05	0.00883164
A_12_P167679	NM_001129406	C45B11.6	-2.53418	1.21061e-05	0.00339234
A_12_P118525	NM_070638	Y116A8C.38	-2.53368	4.99706e-05	0.00776523
A_12_P111421	NM_076322	F48D6.4	-2.5323	4.75878e-06	0.00209097
A_12_P167975	NM_069411	F44D12.6	-2.53163	0.000286256	0.0259699
A_12_P170177	NM_001027489	K04C2.8	-2.53119	0.00017608	0.0182969
A_12_P105180	NM_182009	T06A4.1	-2.53023	5.69608e-06	0.00229702
A_12_P107630	NM_073701	K01D12.15	-2.52778	7.06456e-05	0.00972617
A_12_P137533	NM_001276812	Y67D8B.3	-2.52639	0.000232848	0.0223826
A_12_P107639	NM_067998	Y37E11AL.2	-2.52551	2.54681e-05	0.00510854
A_12_P162753	NM_068049	clec-79	-2.52484	4.16093e-05	0.00692092
A_12_P164649	NM_061147	Y105E8B.9	-2.52323	0.000254231	0.0238304
A_12_P107446	NM_061312	cpn-2	-2.52259	3.28884e-05	0.00594134
A_12_P177727	NM_171577	Y39B6A.30	-2.52212	0.000388282	0.0325122
A_12_P115143	NM_068420	B0273.1	-2.51889	0.000101728	0.0123808
A_12_P107631	NM_069608	T11G6.7	-2.51567	1.25793e-05	0.00346768
A_12_P140795	NM_068063	F35F11.2	-2.51283	6.75048e-05	0.0094631
A_12_P111083	NM_068305	C09B9.3	-2.51169	3.11931e-05	0.0057747
A_12_P119900	NM_070741	W03F9.3	-2.51098	3.26667e-05	0.0059149
A_12_P116622	NM_001026390	K07A3.3	-2.50895	0.000224337	0.0218531
A_12_P108537	NM_066218	F08F8.6	-2.50738	9.39031e-05	0.0117192
A_12_P142616	NM_066935	Y39A1A.2	-2.50691	0.000321402	0.0283393
A_12_P105386	NM_059472	C55B7.10	-2.50637	5.30496e-05	0.00803372
A_12_P142406	NM_001129598	cyn-17	-2.50614	4.85763e-05	0.00762405
A_12_P103408	NM_064358	Y38F1A.1	-2.5047	1.00519e-05	0.00305323
A_12_P168359	NM_001027353	cblc-1	-2.50434	0.000375319	0.0317342
A_12_P111163	NM_060386	fbxa-125	-2.50237	1.90327e-05	0.00434182
A_12_P114055	NM_077287	ZC373.3	-2.50155	8.05781e-05	0.0106168
A_12_P150274	NM_001026339	F56G4.7	-2.50117	9.96714e-05	0.0122062
A_12_P117286	NM_075074	F59A1.13	-2.50086	0.000623317	0.0461983
A_12_P113634	NM_058390	Y95B8A.4	-2.49965	0.00038124	0.0320886
A_12_P115186	NM_076321	F48D6.4	-2.49846	7.97063e-06	0.00272666
A_12_P118556	NM_065026	Y22D7AL.9	-2.49637	4.51976e-06	0.00206392
A_12_P114775	NM_075517	Y113G7C.1	-2.49567	3.62832e-05	0.00633584
A_12_P114543	NM_071007	Y75B7AR.1	-2.4946	3.35573e-07	0.000471231
A_12_P169323	NM_065616	C35D10.2	-2.49441	4.05904e-05	0.00682083
A_12_P146419	NM_059482	T10E9.8	-2.49204	7.07059e-06	0.0025617
A_12_P108080	NM_069690	C08F8.4	-2.49179	8.71056e-06	0.00284125
A_12_P150635	NM_074138	F14D7.1	-2.49163	7.17739e-06	0.00258607
A_12_P116574	NM_068405	ZK616.7	-2.49139	7.56739e-05	0.0101582
A_12_P173668	NM_069862	ZK829.1	-2.49001	2.777e-06	0.00161906
A_12_P104867	NM_058623	F32B5.4	-2.48967	0.00058403	0.0438902
A_12_P118112	NM_073307	F32G8.4	-2.48877	2.04406e-06	0.00136401
A_12_P165731	NM_058877	F47B3.1	-2.48815	7.10965e-05	0.00975257
A_12_P105434	NM_058877	F47B3.1	-2.48562	0.000121094	0.0140326
A_12_P140796	NM_068063	F35F11.2	-2.4817	4.10528e-05	0.00685159
A_12_P149990	NM_073701	K01D12.15	-2.47951	2.3819e-05	0.0049086
A_12_P105596	NM_070344	Y67A10A.8	-2.47876	0.000404171	0.033436
A_12_P111682	NM_071634	T27C4.2	-2.47802	1.39991e-05	0.00367911
A_12_P142683	NM_001047586	Y57G11C.52	-2.47736	0.000398341	0.0330791
A_12_P177915	NM_072205	K12B6.2	-2.46939	0.000200612	0.0201444
A_12_P105912	NM_063911	C09G5.7	-2.46645	8.97206e-05	0.0113562
A_12_P120276	NM_062594	gcy-12	-2.46506	4.81743e-05	0.00758827
A_12_P162935	NM_067505	F18F11.4	-2.46505	1.42341e-05	0.00371602
A_12_P142684	NM_001047586	Y57G11C.52	-2.46479	0.000505875	0.0395719
A_12_P105330	NM_068682	C25A8.2	-2.46228	0.000240338	0.0229335
A_12_P110597	NM_067322	Y39E4B.11	-2.46195	4.30432e-05	0.00707095
A_12_P168024	NM_058646	W03D8.8	-2.46129	1.22264e-08	9.40655e-05
A_12_P150636	NM_074138	F14D7.1	-2.46082	3.31508e-05	0.00596785
A_12_P104410	NM_064060	B0334.10	-2.45768	0.000116872	0.0137196
A_12_P147040	NM_001047432	ZK688.12	-2.45747	1.54549e-05	0.00387484
A_12_P108170	NM_065375	cyp-25A2	-2.4545	9.97775e-07	0.000904162
A_12_P149585	NM_073070	F25B3.5	-2.45445	1.24456e-05	0.0034414
A_12_P151337	NM_061253	C23H3.9	-2.45356	6.12519e-06	0.00236394
A_12_P103520	NM_069985	T04A11.2	-2.45121	5.62442e-08	0.000182387
A_12_P136330	NM_001027619	T21C12.8	-2.44849	1.18829e-05	0.00334713
A_12_P112460	NM_058864	T20F5.5	-2.44711	2.91573e-05	0.00556604
A_12_P116985	NM_069930	C42C1.3	-2.44553	1.00898e-05	0.00305951
A_12_P117283	NM_065264	R148.5	-2.44074	9.99709e-05	0.0122314
A_12_P105029	NM_067038	Y47D3A.5	-2.43695	8.96457e-05	0.011354
A_12_P116527	NM_066071	F37A4.3	-2.43438	0.000248205	0.0234391
A_12_P114102	NM_067533	M04G7.2	-2.4322	4.52282e-05	0.0072761
A_12_P105070	NM_058867	T21E3.2	-2.43157	0.000101073	0.0123277
A_12_P103600	NM_001047293	F10G7.12	-2.42859	1.26265e-05	0.00346768
A_12_P137780	NM_058855	C50F2.5	-2.42744	1.62173e-05	0.0039806
A_12_P142730	NM_058673	Y71F9AL.2	-2.42511	8.67652e-05	0.0111329
A_12_P111449	NM_066412	ncr-2	-2.42217	5.57367e-06	0.00227725
A_12_P101110	NM_069365	K07F5.8	-2.4211	8.94815e-06	0.00287867
A_12_P118096	NM_065121	T20H9.6	-2.42102	0.000167745	0.0176302
A_12_P150270	NM_001026339	F56G4.7	-2.41921	6.56409e-05	0.00929479
A_12_P117067	NM_065235	T20B6.1	-2.41583	5.36797e-05	0.008101
A_12_P130926	NM_001026390	K07A3.3	-2.40844	0.000347294	0.0300321
A_12_P117451	NM_069494	R09E10.1	-2.40645	2.63851e-05	0.00521365
A_12_P106730	NM_058855	C43E11.5	-2.406	2.80085e-05	0.0054459
A_12_P140780	NM_061532	clec-119	-2.40573	0.000302571	0.0271054
A_12_P118294	NM_059307	C34G6.3	-2.40535	6.96722e-05	0.00963271
A_12_P112577	NM_072153	dhs-16	-2.40445	8.82821e-05	0.0112649
A_12_P108235	NM_068311	C09B9.7	-2.40414	6.22662e-05	0.00898449
A_12_P170653	NM_059361	ssp-16	-2.40372	0.000243821	0.0231677
A_12_P115549	NM_001027291	Y53C12A.7	-2.40233	0.000364641	0.03109
A_12_P158236	NM_060932	M01E5.1	-2.40169	1.95081e-05	0.00439117
A_12_P155021	NM_001028451	ZK795.4	-2.40164	0.000163744	0.0173132
A_12_P145775	NM_001129602	ZC412.10	-2.40064	0.000303349	0.0271334
A_12_P165984	NM_066635	ZC84.1	-2.40019	0.000280908	0.0255912
A_12_P109249	NM_058377	mps-3	-2.39768	6.55924e-05	0.00929127
A_12_P107434	NM_070721	B0348.5	-2.39717	0.000575362	0.0433899
A_12_P179330	NM_068490	H32C10.1	-2.39706	0.000249882	0.0235497
A_12_P113050	NM_075511	mlt-4	-2.39699	9.81053e-06	0.00302026
A_12_P110174	NM_076418	F43C9.1	-2.39695	8.0101e-07	0.000795891
A_12_P158130	NM_065193	H19M22.3	-2.3969	0.000123877	0.0142541
A_12_P115578	NM_069082	C49C8.1	-2.39449	2.94362e-05	0.00559054
A_12_P179020	NM_063742	pho-11	-2.39407	0.000631701	0.0466787
[truncated: 2,499 more rows]

## Sheet: L4_S-YA_W
AgilentID	GenbankAccession	GeneSymbol	log2FC L4_S - YA_W	P.Value L4_S - YA_W	FDR L4_S - YA_W
A_12_P108101	NM_063849	sdz-37	-6.00867	1.52342e-09	1.14964e-05
A_12_P141140	NM_001038416	T28A11.22	-5.88886	2.63172e-11	2.06525e-06
A_12_P107052	NM_064253	F15A4.2	-5.76475	1.07567e-07	0.00015927
A_12_P135906	NM_001038396	F41E6.15	-5.70281	1.26678e-06	0.000788973
A_12_P119926	NM_061489	btb-11	-5.60635	5.04555e-08	9.32724e-05
A_12_P135908	NM_001038396	F41E6.15	-5.59424	1.16448e-05	0.00328717
A_12_P109897	NM_064174	Y43F11A.1	-5.56362	2.05309e-05	0.00457716
A_12_P135909	NM_001038396	F41E6.15	-5.54761	1.99064e-08	5.42416e-05
A_12_P135905	NM_001038396	F41E6.15	-5.51627	5.55057e-08	9.99038e-05
A_12_P173767	NM_065957	T12A2.3	-5.51533	8.8065e-09	3.3111e-05
A_12_P166844	NM_061488	F45D11.1	-5.45816	0.000134393	0.0154596
A_12_P105890	NM_072373	C33G8.3	-5.45728	3.50329e-06	0.00153245
A_12_P110716	NM_059905	K02B12.2	-5.41285	1.02945e-05	0.00302344
A_12_P141143	NM_001038416	T28A11.22	-5.39548	5.37159e-07	0.000448442
A_12_P135907	NM_001038396	F41E6.15	-5.37489	2.47582e-07	0.000275198
A_12_P110057	NM_063607	Y51B9A.4	-5.36196	6.64253e-05	0.00973613
A_12_P111161	NM_070761	kin-34	-5.34606	5.3931e-07	0.000449282
A_12_P111745	NM_074836	T25E12.6	-5.33385	7.7441e-06	0.00251093
A_12_P101254	NM_070425	clec-190	-5.31967	4.80237e-08	9.04744e-05
A_12_P109560	NM_061989	Y110A2AL.1	-5.31686	6.13368e-11	2.32818e-06
A_12_P132880	NM_060518	nhr-74	-5.29758	3.38972e-07	0.000337574
A_12_P141141	NM_001038416	T28A11.22	-5.2494	2.32372e-08	5.94637e-05
A_12_P119256	NM_069259	F56D5.5	-5.22368	3.50769e-05	0.00638077
A_12_P106664	NM_061501	btb-10	-5.20607	3.16243e-08	6.97112e-05
A_12_P108385	NM_060521	nhr-259	-5.19588	9.85239e-09	3.42943e-05
A_12_P109968	NM_060374	lam-3	-5.18502	6.00045e-08	0.000103264
A_12_P102451	NM_072337	col-143	-5.17955	4.53943e-06	0.0017776
A_12_P137365	NM_060531	nhr-245	-5.09161	1.54371e-06	0.000906758
A_12_P117404	NM_064029	C33B4.2	-5.09159	2.59095e-07	0.000280869
A_12_P117307	NM_075498	fbxb-59	-5.01678	2.5905e-05	0.00528299
A_12_P114715	NM_061988	Y110A2AL.10	-4.99862	6.9446e-08	0.000116448
A_12_P154228	NM_171204	dpf-6	-4.98967	4.91005e-05	0.00802277
A_12_P113800	NM_059386	T05E7.5	-4.95931	2.29406e-10	5.14245e-06
A_12_P104704	NM_071185	C45H4.14	-4.95672	3.48112e-06	0.00152786
A_12_P177475	NM_060928	F44F1.6	-4.90868	5.68083e-09	2.5666e-05
A_12_P111667	NM_060520	nhr-73	-4.90862	2.00255e-07	0.000242269
A_12_P102279	NM_071185	C45H4.14	-4.90667	1.0338e-09	9.8985e-06
A_12_P173768	NM_065957	T12A2.3	-4.90044	5.35405e-07	0.000447931
A_12_P105245	NM_182328	R02C2.6	-4.89151	2.72732e-05	0.00544564
A_12_P107458	NM_001047497	clec-172	-4.87553	1.94041e-06	0.00104154
A_12_P133170	NM_060521	nhr-259	-4.8605	1.13111e-06	0.000729963
A_12_P114862	NM_067302	col-98	-4.85688	7.96742e-08	0.000127601
A_12_P117387	NM_061209	ces-2	-4.85193	2.96673e-06	0.00137666
A_12_P108792	NM_063856	ZK666.4	-4.83769	1.21692e-06	0.000766187
A_12_P114368	NM_077167	B0416.2	-4.81873	2.03414e-09	1.45117e-05
A_12_P107287	NM_060983	Y87G2A.12	-4.79912	4.06446e-09	2.07116e-05
A_12_P157020	NM_001026271	F32H2.11	-4.78698	1.06111e-07	0.00015771
A_12_P105724	NM_060431	C35E7.3	-4.77244	4.78183e-07	0.000415982
A_12_P162411	NM_067061	T28D6.3	-4.75947	0.000104137	0.0130089
A_12_P132641	NM_077765	K03A11.1	-4.75021	1.77071e-06	0.00098272
A_12_P169978	NM_171053	gst-34	-4.73909	5.86949e-07	0.000473877
A_12_P108609	NM_060719	C47F8.1	-4.71811	8.2573e-07	0.000594768
A_12_P117190	NM_060938	M01E5.6	-4.71628	1.38734e-06	0.00083674
A_12_P132640	NM_077765	K03A11.1	-4.69421	3.74383e-11	2.32818e-06
A_12_P100216	NM_061829	B0281.5	-4.653	5.08077e-05	0.00821074
A_12_P110377	NM_065957	T12A2.3	-4.6502	8.9347e-07	0.00062359
A_12_P113536	NM_076450	hsd-2	-4.63085	5.25855e-05	0.00837013
A_12_P162408	NM_067061	T28D6.3	-4.62198	3.71896e-07	0.000353328
A_12_P169822	NM_001038257	C02F5.14	-4.61778	1.61179e-06	0.000931408
A_12_P140300	NM_182368	C45H4.14	-4.59551	6.66218e-09	2.78093e-05
A_12_P101749	NM_069322	sdz-36	-4.56769	6.57201e-09	2.77279e-05
A_12_P113187	NM_060983	Y87G2A.12	-4.56286	1.52357e-09	1.14964e-05
A_12_P106414	NM_069273	C33A12.12	-4.55809	8.29632e-10	9.04242e-06
A_12_P168569	NM_060531	nhr-245	-4.55034	4.90757e-07	0.000422282
A_12_P155726	NM_060518	nhr-74	-4.54535	3.076e-08	6.85766e-05
A_12_P162409	NM_067061	T28D6.3	-4.51715	6.26085e-06	0.00217206
A_12_P116074	NM_076279	T22B2.1	-4.50764	8.97411e-08	0.000138631
A_12_P154227	NM_171204	dpf-6	-4.50578	9.75343e-06	0.00291248
A_12_P162953	NM_066032	F23F12.3	-4.49077	2.12054e-06	0.00110904
A_12_P104299	NM_071820	skr-7	-4.47256	3.98593e-05	0.00697131
A_12_P112582	NM_071818	Y47D7A.2	-4.44501	2.29903e-07	0.000263394
A_12_P154225	NM_171204	dpf-6	-4.43217	4.60115e-06	0.0017873
A_12_P154226	NM_171204	dpf-6	-4.43158	2.36749e-05	0.00499432
A_12_P120115	NM_077660	F17A2.13	-4.40414	7.30561e-09	2.92504e-05
A_12_P132642	NM_077765	K03A11.1	-4.39801	1.05141e-06	0.000696868
A_12_P115345	NM_076606	C09B8.5	-4.39694	2.70673e-06	0.00130371
A_12_P162410	NM_067061	T28D6.3	-4.38853	0.000165491	0.0177611
A_12_P110869	NM_060518	nhr-74	-4.38391	4.42039e-08	8.6291e-05
A_12_P114542	NM_070759	kin-33	-4.37607	1.30829e-06	0.00080714
A_12_P145521	NM_001027321	ZC239.20	-4.33479	1.08804e-06	0.000709171
A_12_P110948	NM_060429	C35E7.5	-4.32246	2.10858e-05	0.00464268
A_12_P116222	NM_076760	F41C6.4	-4.31623	5.77384e-09	2.5666e-05
A_12_P103723	NM_062626	EEED8.15	-4.31236	7.54037e-09	2.95865e-05
A_12_P146927	NM_071823	Y47D7A.11	-4.27045	3.19822e-09	1.76823e-05
A_12_P116968	NM_069757	F22B3.7	-4.26739	2.26745e-05	0.00483791
A_12_P115875	NM_001026165	let-653	-4.25496	8.67857e-09	3.30607e-05
A_12_P110839	NM_064301	nhr-235	-4.2166	4.63949e-06	0.00179175
A_12_P115454	NM_061482	F45D11.14	-4.21526	9.19645e-05	0.0119723
A_12_P109359	NM_071998	C52A10.3	-4.20555	8.80276e-06	0.00272877
A_12_P102530	NM_078003	F23D12.4	-4.19169	2.83557e-09	1.67301e-05
A_12_P117336	NM_064590	sdz-26	-4.18047	2.23024e-06	0.00114541
A_12_P168305	NM_063607	Y51B9A.4	-4.17764	1.23323e-07	0.00017349
A_12_P119277	NM_061873	F42G2.6	-4.17648	3.65505e-06	0.00156687
A_12_P104525	NM_070404	ccch-5	-4.17365	2.91563e-08	6.80015e-05
A_12_P114221	NM_061797	C40A11.2	-4.17197	2.98561e-05	0.00575384
A_12_P100838	NM_063847	ZK673.5	-4.15733	3.69737e-07	0.000353328
A_12_P163359	NM_060928	F44F1.6	-4.13613	0.000154178	0.0169352
A_12_P115702	NM_058541	W03F11.1	-4.13573	3.41045e-06	0.00150865
A_12_P118230	NM_073851	far-4	-4.13135	2.88989e-08	6.80015e-05
A_12_P100741	NM_078239	R11.4	-4.13048	6.73899e-07	0.000519492
A_12_P103390	NM_074316	C01G10.6	-4.12903	0.000315148	0.0277194
A_12_P103335	NM_062174	W10G11.2	-4.11885	8.56291e-07	0.000607572
A_12_P102953	NM_074812	W06G6.10	-4.10527	1.14602e-07	0.00016593
A_12_P107239	NM_182207	fbxc-40	-4.0934	0.000124357	0.014653
A_12_P120120	NM_001026184	C01G10.15	-4.08429	1.76484e-05	0.00422758
A_12_P162954	NM_066032	F23F12.3	-4.07961	5.14042e-06	0.00192086
A_12_P107852	NM_061978	K12H6.7	-4.07789	8.97911e-05	0.0117677
A_12_P145520	NM_001027321	ZC239.20	-4.07405	3.86708e-06	0.00162283
A_12_P119577	NM_062279	sdz-7	-4.07103	4.11358e-07	0.000381576
A_12_P110420	NM_078368	K09E3.5	-4.06749	2.07801e-05	0.00460855
A_12_P111001	NM_070788	scl-27	-4.06594	3.48828e-05	0.0063543
A_12_P102027	NM_070838	nhr-155	-4.06085	4.16666e-07	0.000383778
A_12_P161268	NM_001027321	ZC239.20	-4.06014	4.87807e-06	0.00185109
A_12_P146925	NM_071823	Y47D7A.11	-4.03215	7.82579e-08	0.000127213
A_12_P143870	NM_062275	nhr-75	-4.03103	4.57841e-09	2.30314e-05
A_12_P148645	NM_070877	ugt-42	-4.03029	1.20826e-07	0.000171484
A_12_P104361	NM_067061	T28D6.3	-4.02515	6.97973e-06	0.00233547
A_12_P102861	NM_060685	F14B6.3	-4.01178	0.000360313	0.0303451
A_12_P171136	NM_071998	C52A10.3	-4.00862	8.51024e-07	0.000607432
A_12_P110854	NM_071817	Y47D7A.7	-4.00055	3.82739e-12	7.50886e-07
A_12_P103674	NM_064452	Y48E1B.8	-4.00036	3.94332e-08	7.97557e-05
A_12_P117974	NM_059819	K04G2.10	-3.99445	6.86233e-06	0.00230988
A_12_P139650	NM_062174	W10G11.2	-3.99186	0.000135886	0.0155719
A_12_P111215	NM_074760	str-14	-3.9589	8.22475e-07	0.000594768
A_12_P155181	NM_069342	cav-1	-3.95357	2.45936e-06	0.00121866
A_12_P110757	NM_067651	dsl-2	-3.93591	5.64499e-09	2.5666e-05
A_12_P118455	NM_062123	bath-9	-3.92194	1.56084e-07	0.000202878
A_12_P117740	NM_077841	F02D10.6	-3.92106	3.33948e-07	0.000335982
A_12_P103944	NM_070917	srp-2	-3.90903	1.03547e-08	3.47258e-05
A_12_P108697	NM_061329	C24H12.7	-3.90664	0.000213079	0.0210491
A_12_P177478	NM_060928	F44F1.6	-3.90463	2.36304e-05	0.00498762
A_12_P120057	NM_077837	fkh-4	-3.9012	0.00018782	0.0192921
A_12_P177477	NM_060928	F44F1.6	-3.89698	3.63254e-08	7.58149e-05
A_12_P105154	NM_077596	F55G7.2	-3.89643	0.000109053	0.0134053
A_12_P105236	NM_001129406	C45B11.6	-3.88941	2.21439e-06	0.00113876
A_12_P106746	NM_067943	C04C3.7	-3.88918	1.58328e-07	0.00020503
A_12_P101661	NM_071540	C04E12.10	-3.87669	0.000154236	0.0169352
A_12_P103520	NM_069985	T04A11.2	-3.86306	6.26049e-10	7.22488e-06
A_12_P108776	NM_061582	math-45	-3.84851	3.1448e-05	0.00594956
A_12_P171568	NM_069483	Y43C5A.3	-3.84691	1.83047e-06	0.00100312
A_12_P155182	NM_069342	cav-1	-3.82807	1.02332e-06	0.000688726
A_12_P100521	NM_061625	fbxb-15	-3.82604	0.000178318	0.018653
A_12_P171135	NM_071998	C52A10.3	-3.81917	2.43081e-06	0.00120751
A_12_P102513	NM_077551	hnd-1	-3.81847	4.97584e-05	0.00809787
A_12_P118257	NM_063590	F42A8.1	-3.81478	6.96347e-05	0.0100526
A_12_P111679	NM_061970	set-13	-3.80225	5.33339e-05	0.00844765
A_12_P155180	NM_069342	cav-1	-3.78943	2.26733e-05	0.00483791
A_12_P151770	NM_001029258	clec-266	-3.78939	1.18386e-07	0.000168916
A_12_P112916	NM_077836	fkh-3	-3.78747	0.000566331	0.0411584
A_12_P106850	NM_071452	Y73C8C.8	-3.78286	2.04377e-07	0.000243746
A_12_P168304	NM_063607	Y51B9A.4	-3.77527	2.03939e-06	0.00108683
A_12_P143540	NM_075363	sdz-6	-3.77447	3.3212e-07	0.000335002
A_12_P134970	NM_001038257	C02F5.14	-3.76821	1.51985e-05	0.00388861
A_12_P100570	NM_073997	fbxa-181	-3.75705	6.04997e-05	0.0091761
A_12_P115823	NM_001028151	col-135	-3.75664	1.3206e-06	0.000812178
A_12_P101789	NM_076854	C10A4.1	-3.75186	1.84865e-07	0.000228102
A_12_P161269	NM_001027321	ZC239.20	-3.74454	4.51201e-06	0.00177217
A_12_P117253	NM_064034	C05D12.5	-3.73909	1.22412e-05	0.00339048
A_12_P107302	NM_077034	dpy-6	-3.72455	3.87038e-07	0.000363312
A_12_P134971	NM_001038257	C02F5.14	-3.70859	8.79722e-06	0.00272877
A_12_P167935	NM_061451	fbxc-28	-3.70155	2.2555e-10	5.14245e-06
A_12_P118262	NM_078020	T24C2.2	-3.69067	9.32574e-06	0.00282639
A_12_P171567	NM_069483	Y43C5A.3	-3.67939	6.98917e-07	0.000531091
A_12_P102701	NM_064849	T17H7.1	-3.66402	7.32617e-05	0.0103736
A_12_P105614	NM_064313	Y46G5A.8	-3.66342	1.48344e-07	0.000197581
A_12_P155183	NM_069342	cav-1	-3.66129	3.05716e-06	0.00140135
A_12_P171132	NM_071998	C52A10.3	-3.65064	9.95294e-08	0.000150203
A_12_P113391	NM_069014	F17E9.2	-3.64744	0.000182059	0.0189133
A_12_P110700	NM_070338	fbxa-83	-3.63631	1.12968e-07	0.00016417
A_12_P114246	NM_063852	ZK666.1	-3.63214	0.000416603	0.0334421
A_12_P116902	NM_077494	ZK455.5	-3.62893	4.04612e-05	0.00703099
A_12_P103476	NM_078191	srxa-9	-3.61775	1.12573e-06	0.000727786
A_12_P112965	NM_077026	ced-8	-3.61293	1.53173e-05	0.00390879
A_12_P146926	NM_071823	Y47D7A.11	-3.6086	3.24894e-05	0.00605894
A_12_P119603	NM_069029	sdz-25	-3.60623	1.22799e-05	0.00339048
A_12_P117295	NM_078241	F23A7.1	-3.57283	9.6841e-06	0.00289619
A_12_P117422	NM_061474	fbxc-40	-3.56208	0.00019115	0.0195573
A_12_P109235	NM_062953	T19D12.10	-3.56191	6.32413e-07	0.000499151
A_12_P111980	NM_062270	nhr-72	-3.56011	4.41103e-07	0.000394698
A_12_P156105	NM_069030	M116.1	-3.55978	5.70525e-10	6.83451e-06
A_12_P102875	NM_061475	fbxc-39	-3.55551	3.32875e-05	0.00616719
A_12_P111940	NM_069342	cav-1	-3.54985	9.1133e-06	0.0027939
A_12_P117186	NM_062210	sea-1	-3.5415	0.000120346	0.0143528
A_12_P132643	NM_077765	K03A11.1	-3.54055	1.33236e-09	1.08914e-05
A_12_P111168	NM_064988	Y82E9BL.5	-3.53599	6.98186e-06	0.00233547
A_12_P101821	NM_001047327	math-34	-3.53331	3.59849e-07	0.000348806
A_12_P101215	NM_075353	F55C9.5	-3.52244	1.19649e-06	0.000757212
A_12_P138201	NM_001028589	kin-33	-3.51514	8.31693e-05	0.0112445
A_12_P156107	NM_069030	M116.1	-3.51287	2.80208e-09	1.67301e-05
A_12_P117390	NM_069483	Y43C5A.3	-3.50504	7.03471e-06	0.00234914
A_12_P162955	NM_066032	F23F12.3	-3.49316	7.17989e-05	0.010237
A_12_P107228	NM_067581	col-103	-3.47796	3.83402e-07	0.00036104
A_12_P115427	NM_068144	W03B1.6	-3.47421	7.69038e-06	0.00249794
A_12_P106319	NM_069129	T11B7.1	-3.4641	4.62493e-07	0.000405069
A_12_P156108	NM_069030	M116.1	-3.45859	3.59684e-08	7.54711e-05
A_12_P115403	NM_078185	ZK662.5	-3.45712	8.52434e-07	0.000607432
A_12_P103709	NM_065916	tbx-11	-3.45184	2.26974e-05	0.00484016
A_12_P100728	NM_075424	W04E12.2	-3.43523	1.05027e-06	0.000696868
A_12_P145467	NM_060983	Y87G2A.12	-3.43166	5.6473e-07	0.000463764
A_12_P119054	NM_001083279	T26H2.10	-3.42827	2.43988e-05	0.00508687
A_12_P166854	NM_061500	K02E7.6	-3.42452	4.374e-05	0.00739633
A_12_P100718	NM_074695	F21H7.3	-3.42178	1.06013e-06	0.000700282
A_12_P102641	NM_058667	Y71F9AL.6	-3.41611	2.99634e-05	0.00577167
A_12_P103964	NM_062247	T24E12.11	-3.40737	2.6199e-07	0.000280869
A_12_P108583	NM_062767	H41C03.1	-3.40231	1.75946e-08	5.03917e-05
A_12_P116353	NM_063666	T15H9.6	-3.39175	4.86503e-06	0.00184972
A_12_P101414	NM_058852	abf-1	-3.38608	2.52344e-05	0.00519211
A_12_P150187	NM_062261	skr-15	-3.38583	0.000315803	0.0277708
A_12_P177476	NM_060928	F44F1.6	-3.38346	2.94577e-08	6.80015e-05
A_12_P120230	NM_062175	W10G11.3	-3.37855	5.91519e-06	0.00209989
A_12_P120349	NM_063731	C08H9.14	-3.34841	3.10491e-06	0.00141527
A_12_P113706	NM_182233	sra-35	-3.34356	1.94857e-05	0.00447339
A_12_P112369	NM_069218	flh-3	-3.33898	5.21816e-06	0.00193523
A_12_P107826	NM_062036	Y25C1A.6	-3.33755	7.09752e-06	0.00236609
A_12_P106474	NM_061391	T02H6.5	-3.33729	1.59529e-06	0.000925966
A_12_P119819	NM_075391	Y43F8B.6	-3.32871	1.12278e-05	0.003211
A_12_P104533	NM_067139	fbxb-22	-3.32461	4.00831e-05	0.00699315
A_12_P156106	NM_069030	M116.1	-3.31314	6.84851e-07	0.000523818
A_12_P119402	NM_067680	clp-6	-3.30945	7.35083e-06	0.00241362
A_12_P117564	NM_064879	T24C4.2	-3.30913	2.95908e-08	6.80015e-05
A_12_P115048	NM_077888	C04A11.2	-3.3053	5.95399e-07	0.000475804
A_12_P156109	NM_069030	M116.1	-3.29163	1.84359e-06	0.0010089
A_12_P102171	NM_076099	vang-1	-3.28591	3.92733e-06	0.00163935
A_12_P177034	NM_061827	fbxc-25	-3.27902	3.2779e-09	1.76823e-05
A_12_P150188	NM_062261	skr-15	-3.27008	0.000511716	0.0385022
A_12_P150185	NM_062261	skr-15	-3.25852	0.000564539	0.0410738
A_12_P142211	NM_068581	Y73B6BL.24	-3.25672	2.94651e-09	1.7002e-05
A_12_P113407	NM_061451	fbxc-28	-3.25446	0.000122397	0.01454
A_12_P162648	NM_067945	grd-3	-3.25414	7.98223e-07	0.000586522
A_12_P108156	NM_061986	Y110A2AL.3	-3.24727	1.7909e-05	0.00426474
A_12_P100881	NM_069915	F35G2.3	-3.24384	8.0494e-05	0.011051
A_12_P177124	NM_073881	F57B1.1	-3.24067	2.43629e-07	0.000273052
A_12_P104429	NM_182386	F21H7.12	-3.23879	7.34998e-05	0.0103894
A_12_P104766	NM_070643	skr-8	-3.23795	3.37377e-05	0.00621511
A_12_P114599	NM_062772	F55C12.6	-3.23172	3.3511e-05	0.00618771
A_12_P117327	NM_074802	Y32B12C.3	-3.22544	2.51584e-06	0.00122933
A_12_P168544	NM_064034	C05D12.5	-3.22408	8.68973e-05	0.0115234
A_12_P110442	NM_075152	C31G12.1	-3.22007	1.46799e-05	0.00379199
A_12_P113724	NM_077659	ceh-40	-3.21811	1.22685e-05	0.00339048
A_12_P142210	NM_068581	Y73B6BL.24	-3.21763	8.86053e-09	3.3111e-05
A_12_P177125	NM_073881	F57B1.1	-3.21369	6.71205e-06	0.00227824
A_12_P104835	NM_073881	F57B1.1	-3.21146	2.66642e-07	0.000284304
A_12_P105189	NM_059288	nhr-2	-3.20633	1.23673e-05	0.00339819
A_12_P108838	NM_068237	Y17G9B.2	-3.19708	2.61126e-07	0.000280869
A_12_P117224	NM_071016	cnc-3	-3.1963	1.88211e-05	0.00439006
A_12_P151771	NM_001029258	clec-266	-3.19226	2.28449e-07	0.000263394
A_12_P169977	NM_171053	gst-34	-3.192	0.000483933	0.0370432
A_12_P106833	NM_060374	lam-3	-3.19046	5.23609e-09	2.5055e-05
A_12_P106495	NM_061653	btb-6	-3.18444	0.00011139	0.0136115
A_12_P161271	NM_001027321	ZC239.20	-3.17993	0.000243237	0.0231426
A_12_P101356	NM_076553	T22B7.7	-3.16666	8.73296e-06	0.00272406
A_12_P117652	NM_067386	T27E9.6	-3.16644	8.03523e-10	9.00806e-06
A_12_P106263	NM_001028616	F11A5.15	-3.16558	1.70388e-05	0.004134
A_12_P110851	NM_077098	C28G1.4	-3.1654	2.79054e-07	0.000292302
A_12_P161803	NM_076179	dhs-26	-3.15903	1.76359e-07	0.000221083
A_12_P117748	NM_060435	C35E7.1	-3.15888	1.64245e-05	0.00404555
A_12_P102662	NM_077199	C07B5.2	-3.14971	2.20173e-05	0.00476561
A_12_P100984	NM_071949	K11D12.6	-3.14826	1.80419e-07	0.000224025
A_12_P110977	NM_069775	F12F6.8	-3.14712	2.05755e-06	0.00108683
A_12_P111125	NM_062173	W10G11.1	-3.14049	1.82144e-06	0.00100292
A_12_P179639	NM_067488	dpy-9	-3.13075	0.000681253	0.046683
A_12_P107078	NM_001027251	sri-40	-3.12964	5.15182e-09	2.5055e-05
A_12_P117281	NM_074601	sri-1	-3.12729	0.000240733	0.023016
A_12_P106308	NM_068301	srm-1	-3.12352	1.64975e-07	0.000211542
A_12_P145031	NM_182233	sra-35	-3.11568	1.84651e-06	0.00100909
A_12_P117692	NM_067945	grd-3	-3.10514	3.58198e-07	0.000348806
A_12_P132515	NM_069006	his-32	-3.10377	2.04973e-05	0.00457228
A_12_P179300	NM_077163	B0416.4	-3.09678	2.26598e-06	0.0011562
A_12_P103265	NM_075364	C43D7.4	-3.09591	6.76046e-06	0.00228915
A_12_P118274	NM_001029257	clec-266	-3.09467	1.12729e-07	0.00016417
A_12_P116253	NM_075948	ZC53.1	-3.09267	3.91337e-07	0.000364729
A_12_P130012	NM_058851	abf-2	-3.08321	1.99957e-06	0.00107037
A_12_P151090	NM_075925	fbxc-37	-3.07588	2.94829e-08	6.80015e-05
A_12_P113674	NM_061500	K02E7.6	-3.06125	0.000246699	0.0233764
A_12_P155465	NM_061449	fbxc-29	-3.05859	4.59491e-07	0.000404925
A_12_P103557	NM_078082	rgs-11	-3.05278	8.17885e-07	0.000594768
A_12_P132518	NM_069006	his-32	-3.04952	2.70148e-05	0.00540814
A_12_P113195	NM_064463	gst-19	-3.04778	3.75129e-05	0.00670057
A_12_P111295	NM_062577	dsh-1	-3.0456	4.59703e-06	0.0017873
A_12_P177126	NM_073881	F57B1.1	-3.03394	8.6697e-09	3.30607e-05
A_12_P138825	NM_064469	fbxa-168	-3.02972	0.000100544	0.0127097
A_12_P119776	NM_001026939	F22E5.20	-3.02527	7.65702e-05	0.0106853
A_12_P117835	NM_070301	ins-34	-3.01819	3.53757e-06	0.00153886
A_12_P107525	NM_171205	dpf-6	-3.01634	0.000196268	0.0198984
A_12_P167934	NM_061451	fbxc-28	-3.01407	5.75429e-08	0.000100796
A_12_P156655	NM_070526	F38C2.1	-3.01106	3.67429e-07	0.000353328
A_12_P102994	NM_061660	F45C12.2	-3.00709	1.47377e-05	0.00379819
A_12_P111335	NM_071453	Y73C8C.3	-3.00467	2.98073e-05	0.00575008
A_12_P116993	NM_068581	Y73B6BL.24	-3.00205	2.98219e-08	6.80015e-05
A_12_P177835	NM_074045	oac-3	-3.00015	2.79931e-05	0.0055195
A_12_P116607	NM_075683	R57.2	-2.994	0.000157453	0.0172091
A_12_P105938	NM_065117	C39B5.2	-2.99328	7.32101e-05	0.0103715
A_12_P173078	NM_074480	fbxa-153	-2.99288	2.36271e-07	0.000266399
A_12_P109432	NM_070657	ZK550.2	-2.9865	1.39493e-07	0.000188796
A_12_P173523	NM_075908	fbxa-170	-2.98619	8.60992e-05	0.0114987
A_12_P155636	NM_001029658	R04A9.7	-2.9833	6.97585e-06	0.00233547
A_12_P132517	NM_069006	his-32	-2.98231	2.43869e-05	0.00508687
A_12_P102960	NM_070588	Y43D4A.6	-2.98168	2.33488e-06	0.00117754
A_12_P111241	NM_068264	T08B6.1	-2.9797	1.60273e-05	0.00400811
A_12_P170792	NM_071823	Y47D7A.11	-2.97644	9.80941e-05	0.012517
A_12_P112957	NM_060788	F33E2.4	-2.96866	1.51052e-10	3.95128e-06
A_12_P132516	NM_069006	his-32	-2.96204	2.08958e-05	0.00462175
A_12_P105624	NM_070547	C35D6.3	-2.96191	5.22604e-05	0.00836275
A_12_P112133	NM_060780	W02D9.9	-2.95837	2.13226e-05	0.00466267
A_12_P143965	NM_070641	skr-13	-2.95069	8.63902e-08	0.000135589
A_12_P106008	NM_073461	clec-222	-2.9503	2.09923e-05	0.00463287
A_12_P151774	NM_001029258	clec-266	-2.95009	6.3929e-06	0.00219844
A_12_P151772	NM_001029258	clec-266	-2.94949	2.58515e-06	0.00126006
A_12_P106719	NM_074480	fbxa-153	-2.92677	7.53008e-08	0.000124667
A_12_P173077	NM_074480	fbxa-153	-2.92113	4.22043e-07	0.000384809
A_12_P108953	NM_067268	Y37D8A.3	-2.91925	4.48112e-06	0.00176534
A_12_P134131	NM_001027322	ZC239.21	-2.9148	8.07553e-05	0.011064
A_12_P105000	NM_076179	dhs-26	-2.91089	6.33519e-07	0.000499151
A_12_P116683	NM_062415	clec-139	-2.9088	5.15219e-06	0.00192086
A_12_P168899	NM_065820	rps-12	-2.9041	5.86379e-06	0.00208974
A_12_P170794	NM_071823	Y47D7A.11	-2.89544	5.46988e-10	6.83451e-06
A_12_P103641	NM_075908	fbxa-170	-2.89544	3.61905e-07	0.00034976
A_12_P114565	NM_078374	K09E3.7	-2.89484	0.000618054	0.0437663
A_12_P112743	NM_061270	T25D3.3	-2.8889	4.81915e-08	9.04744e-05
A_12_P152095	NM_061514	lips-12	-2.8849	3.02732e-06	0.00139582
A_12_P109248	NM_075364	C43D7.4	-2.88312	9.54207e-05	0.0122475
A_12_P112790	NM_001129014	F56F4.8	-2.88255	0.000447975	0.0352141
A_12_P117609	NM_064291	Y38E10A.9	-2.88254	1.73442e-05	0.00417864
A_12_P108987	NM_064475	Y54G9A.4	-2.88102	5.41818e-08	9.79704e-05
A_12_P104992	NM_066032	F23F12.3	-2.87998	0.00022278	0.0217554
A_12_P173522	NM_075908	fbxa-170	-2.87988	4.57305e-05	0.00764204
A_12_P114892	NM_001028235	pes-1	-2.87983	2.12268e-07	0.000248623
A_12_P120362	NM_078131	F46F2.3	-2.87667	9.19955e-06	0.00280037
A_12_P132519	NM_069006	his-32	-2.87509	4.37512e-05	0.00739633
A_12_P149696	NM_001129667	F23D12.10	-2.87042	8.27444e-06	0.00261524
A_12_P103792	NM_059169	F48C1.8	-2.86463	0.000179506	0.0187224
A_12_P112344	NM_070601	Y116A8C.1	-2.86154	1.03303e-06	0.000690582
A_12_P177128	NM_073881	F57B1.1	-2.85297	6.21589e-09	2.70365e-05
A_12_P115957	NM_067402	T05D4.2	-2.85237	0.000569661	0.0413162
A_12_P117303	NM_076904	vit-1	-2.84888	0.000535673	0.0397249
A_12_P104832	NM_070079	F55G11.7	-2.84866	2.39616e-05	0.00503116
A_12_P106177	NM_072463	F10G2.4	-2.84036	2.83251e-06	0.0013321
A_12_P111409	NM_060468	clec-96	-2.8355	2.16314e-05	0.00471535
A_12_P119060	NM_061022	W04A8.3	-2.83465	6.32005e-05	0.00944337
A_12_P115848	NM_068265	T08B6.5	-2.82713	4.28239e-08	8.47601e-05
A_12_P111389	NM_064262	F15A4.10	-2.8263	3.73701e-07	0.000353328
A_12_P142592	NM_001026596	Y47G6A.31	-2.82539	9.34234e-08	0.000142634
A_12_P120267	NM_065390	nit-1	-2.82379	4.90116e-08	9.15759e-05
A_12_P111657	NM_072492	srx-9	-2.8202	7.66768e-07	0.000568735
A_12_P177127	NM_073881	F57B1.1	-2.81719	4.77796e-08	9.04744e-05
A_12_P168060	NM_062192	Y49F6A.1	-2.81517	0.000100099	0.0126862
A_12_P101574	NM_062400	sra-32	-2.81077	8.15076e-05	0.0111047
A_12_P170795	NM_071823	Y47D7A.11	-2.80491	9.3716e-09	3.40008e-05
A_12_P108974	NM_060221	ztf-11	-2.80302	1.17714e-06	0.000748291
A_12_P147085	NM_064453	clec-146	-2.79679	1.74195e-08	5.02571e-05
A_12_P108765	NM_075899	H11E01.2	-2.79404	5.2133e-10	6.83451e-06
A_12_P100106	NM_076953	C18A11.4	-2.78925	7.73765e-05	0.0107433
A_12_P169823	NM_001038257	C02F5.14	-2.78832	0.000127043	0.0148757
A_12_P142590	NM_001026596	Y47G6A.31	-2.7852	1.75821e-07	0.000221083
A_12_P177499	NM_078407	C33E10.1	-2.77714	8.14672e-05	0.0111031
A_12_P132868	NM_078407	C33E10.1	-2.77536	9.63593e-06	0.00289056
A_12_P104324	NM_071093	srab-25	-2.77282	7.33273e-05	0.0103736
A_12_P112435	NM_075854	fbxa-190	-2.77266	5.62329e-08	0.000100293
A_12_P119451	NM_076232	tag-52	-2.77237	1.94718e-07	0.000237846
A_12_P110650	NM_067488	dpy-9	-2.77105	0.00038788	0.0318398
A_12_P102962	NM_001028012	F36H1.12	-2.77058	5.82165e-09	2.5666e-05
A_12_P104838	NM_060516	C27C7.7	-2.75761	1.61617e-05	0.00402851
A_12_P162624	NM_068255	Y17G9A.2	-2.75023	3.40198e-05	0.0062493
A_12_P149455	NM_061651	fbxa-184	-2.74868	0.000108245	0.0133562
A_12_P170793	NM_071823	Y47D7A.11	-2.74595	1.66562e-08	4.87722e-05
A_12_P119957	NM_074045	oac-3	-2.74575	0.000122341	0.0145378
A_12_P151111	NM_078000	F23D12.2	-2.74018	2.63538e-08	6.50351e-05
A_12_P173668	NM_069862	ZK829.1	-2.72561	1.2002e-06	0.000758338
A_12_P101002	NM_073710	cdr-5	-2.72153	1.77803e-06	0.000985387
A_12_P108252	NM_069862	ZK829.1	-2.72046	4.38989e-06	0.00173813
A_12_P179299	NM_077163	B0416.4	-2.71685	0.000364841	0.0305951
A_12_P115005	NM_077149	Y81B9A.2	-2.7136	5.10391e-05	0.00823457
A_12_P151110	NM_078000	F23D12.2	-2.71235	0.00068387	0.0467806
A_12_P180014	NM_072614	ZK742.4	-2.71204	8.6652e-05	0.0115197
A_12_P100637	NM_075876	D1005.2	-2.70365	1.18153e-07	0.000168916
A_12_P142591	NM_001026596	Y47G6A.31	-2.70348	1.35454e-06	0.000822237
A_12_P115016	NM_070621	Y116A8C.22	-2.70178	0.000366758	0.0306916
A_12_P111159	NM_078407	C33E10.1	-2.6936	1.8411e-05	0.00432836
A_12_P142332	NM_001038295	ZC21.10	-2.68744	6.22178e-05	0.00934995
A_12_P177290	NM_073589	sulp-5	-2.68627	3.1471e-07	0.000320739
A_12_P102322	NM_063684	cyp-13A10	-2.68433	2.73893e-09	1.67301e-05
A_12_P113525	NM_077163	B0416.4	-2.68229	6.33531e-05	0.00945538
A_12_P109559	NM_062659	ZK177.1	-2.67232	3.15207e-06	0.00143277
A_12_P178069	NM_078365	sdz-2	-2.67044	0.000602107	0.0429471
A_12_P118505	NM_001028815	F56H9.6	-2.65841	0.000385487	0.0316965
A_12_P115567	NM_070501	skr-10	-2.65379	1.99017e-05	0.00451255
A_12_P130901	NM_063431	T22C8.4	-2.65245	3.03995e-06	0.00139599
A_12_P114177	NM_077796	K08H2.4	-2.64645	3.42154e-05	0.00626764
A_12_P119541	NM_070641	skr-13	-2.6452	4.86192e-07	0.000419274
A_12_P116082	NM_001027225	W07A12.8	-2.64476	7.98202e-09	3.10094e-05
A_12_P114384	NM_061661	F45C12.15	-2.64021	1.80991e-06	0.000998822
A_12_P108262	NM_074436	fbxa-104	-2.63195	0.000206745	0.0206416
A_12_P130900	NM_063431	T22C8.4	-2.62835	3.43886e-06	0.00151609
A_12_P110174	NM_076418	F43C9.1	-2.62612	3.37097e-07	0.000336561
A_12_P118909	NM_076028	T24D8.6	-2.61834	0.000655726	0.0454175
A_12_P110835	NM_064228	Y57A10B.6	-2.61624	2.02201e-05	0.00454602
A_12_P111475	NM_070508	Y105C5B.20	-2.60557	1.15192e-05	0.00326343
A_12_P177500	NM_078407	C33E10.1	-2.6053	4.50888e-05	0.00756704
A_12_P142330	NM_001038295	ZC21.10	-2.6025	0.000383932	0.0316299
A_12_P110231	NM_061467	fbxc-18	-2.59658	0.00013746	0.0156973
A_12_P101092	NM_067335	F56A8.8	-2.59022	7.06954e-07	0.000535243
A_12_P102982	NM_171781	C49F5.8	-2.58987	1.20817e-08	3.91782e-05
A_12_P116776	NM_076831	T08A9.6	-2.58943	1.68359e-08	4.89332e-05
A_12_P165465	NM_001264469	che-13	-2.58837	0.000146038	0.0163427
A_12_P120000	NM_073802	ugt-3	-2.5866	1.05388e-06	0.000697331
A_12_P180015	NM_072614	ZK742.4	-2.57578	9.10106e-05	0.0118836
A_12_P115159	NM_071613	T22F3.10	-2.57367	1.54659e-05	0.00392526
A_12_P180016	NM_072614	ZK742.4	-2.57279	2.30206e-05	0.00488593
A_12_P115551	NM_065557	T04A8.5	-2.56326	0.000322681	0.0282238
A_12_P118915	NM_064817	T19C3.1	-2.5624	1.60743e-05	0.0040173
A_12_P111010	NM_075950	ZC53.6	-2.55677	2.64729e-06	0.0012808
A_12_P110754	NM_001047262	C01F1.3	-2.55641	4.3518e-06	0.00173178
A_12_P110116	NM_069958	F28D1.2	-2.55143	0.000294514	0.0263082
A_12_P173667	NM_069862	ZK829.1	-2.54475	8.8422e-06	0.00273617
A_12_P180017	NM_072614	ZK742.4	-2.53585	0.000160192	0.0173778
A_12_P112661	NM_077819	sir-2.3	-2.53176	2.02075e-05	0.00454602
A_12_P106423	NM_001027764	Y71D11A.3	-2.52783	1.08479e-06	0.000709171
A_12_P157401	NM_071675	sre-9	-2.52525	1.38883e-05	0.00366471
A_12_P115171	NM_059190	F27C1.4	-2.52069	2.23584e-08	5.85792e-05
A_12_P101594	NM_073462	clec-223	-2.51864	2.13745e-05	0.00466453
A_12_P102096	NM_077599	lsd-1	-2.51143	3.36683e-08	7.23852e-05
A_12_P104040	NM_077606	C49F5.6	-2.51094	2.71901e-06	0.00130725
A_12_P154965	NM_001027251	sri-40	-2.50941	0.000229959	0.0223121
A_12_P177254	NM_067068	Y47D3B.4	-2.50467	6.58115e-07	0.000513376
A_12_P111405	NM_062833	F40H3.6	-2.49282	0.00027581	0.0251787
A_12_P105404	NM_078068	F31F6.2	-2.48952	0.00047535	0.0366219
A_12_P177289	NM_073589	sulp-5	-2.47359	4.0447e-05	0.00703099
A_12_P113899	NM_067107	Y41C4A.2	-2.47192	1.05912e-05	0.00308288
A_12_P103153	NM_074326	T01G5.6	-2.46946	7.12756e-08	0.000119008
A_12_P101641	NM_061445	fbxc-24	-2.46763	0.000562407	0.0409871
A_12_P156232	NM_001026410	hlh-2	-2.45673	2.74321e-06	0.00131425
A_12_P105825	NM_065551	T23F11.4	-2.4536	8.99698e-07	0.00062592
A_12_P111370	NM_068776	T12B3.2	-2.44614	1.87913e-05	0.00438883
A_12_P105674	NM_070328	sqrd-1	-2.44587	3.18954e-05	0.00600815
A_12_P106597	NM_001027293	mab-3	-2.4452	9.85784e-05	0.0125543
A_12_P108826	NM_062084	C17F4.8	-2.4359	2.72194e-06	0.00130725
A_12_P101797	NM_001029242	nas-37	-2.43331	0.000553683	0.0404819
A_12_P115283	NM_077427	T21B6.2	-2.43271	1.43418e-07	0.000193381
A_12_P168900	NM_065820	rps-12	-2.43139	0.000158153	0.0172486
A_12_P113819	NM_073589	sulp-5	-2.41439	3.19469e-05	0.00601208
A_12_P111220	NM_063062	T02G5.2	-2.41265	0.000317652	0.0278938
A_12_P102751	NM_067035	Y47D3A.1	-2.41251	2.43118e-06	0.00120751
A_12_P155466	NM_061449	fbxc-29	-2.41143	5.04511e-05	0.00817668
A_12_P112638	NM_060391	fkb-7	-2.4092	1.41895e-05	0.00371722
A_12_P142593	NM_001026596	Y47G6A.31	-2.40865	9.42641e-06	0.00284514
A_12_P119742	NM_062334	R03H10.1	-2.40626	2.92873e-07	0.000304011
A_12_P102084	NM_064123	F43G6.5	-2.40312	0.000304054	0.0269856
A_12_P106593	NM_001029196	spr-3	-2.39974	1.9236e-06	0.00103394
A_12_P145925	NM_063778	ZK945.4	-2.39008	0.000537824	0.0398093
A_12_P106500	NM_064835	W02B3.4	-2.387	8.88456e-07	0.000622514
A_12_P140445	NM_065156	E02H9.7	-2.38459	0.000290186	0.0260554
A_12_P113834	NM_075925	fbxc-37	-2.38125	2.08977e-06	0.00109842
A_12_P104451	NM_060553	F15D3.8	-2.37612	1.14302e-06	0.000736442
A_12_P105842	NM_071675	sre-9	-2.37567	6.9087e-06	0.0023219
A_12_P100883	NM_070436	Y40H7A.11	-2.37566	1.9104e-05	0.00442237
A_12_P104873	NM_061671	F36H5.4	-2.37557	0.000159869	0.0173667
A_12_P111110	NM_077484	inx-2	-2.37483	0.000126083	0.0148088
A_12_P117548	NM_076029	F47G3.3	-2.37325	8.23598e-07	0.000594768
A_12_P118766	NM_070642	skr-9	-2.37209	1.06792e-06	0.000704243
A_12_P101663	NM_070298	noah-2	-2.3695	0.000191669	0.01959
A_12_P169993	NM_063115	F32A5.8	-2.36918	0.00012043	0.0143584
A_12_P142321	NM_058496	Y71G12B.5	-2.36883	7.13849e-05	0.0102076
A_12_P144333	NM_001083306	Y41G9A.10	-2.35933	0.000134909	0.0155098
A_12_P166216	NM_073570	acl-10	-2.35708	0.000388657	0.0318836
A_12_P115041	NM_075154	clec-245	-2.35669	3.40614e-06	0.00150845
A_12_P110685	NM_182423	F59B1.10	-2.35457	2.67117e-05	0.00537526
A_12_P115739	NM_070493	Y105C5B.5	-2.35157	5.78466e-07	0.000470904
A_12_P107572	NM_060100	C17E4.2	-2.35031	8.65943e-07	0.000610269
A_12_P120032	NM_061476	fbxc-42	-2.34784	0.000191256	0.0195616
A_12_P102749	NM_077397	R07A4.3	-2.33709	2.20588e-06	0.00113736
A_12_P144331	NM_001083306	Y41G9A.10	-2.32412	5.08841e-05	0.0082197
A_12_P142331	NM_001038295	ZC21.10	-2.32171	0.000172758	0.0182662
A_12_P177501	NM_078407	C33E10.1	-2.31946	2.88834e-05	0.00563062
A_12_P131714	NM_001026570	spp-23	-2.31788	4.2367e-07	0.000384809
A_12_P111709	NM_070644	skr-12	-2.3156	2.86936e-05	0.00561249
A_12_P101652	NM_077380	M79.3	-2.31264	4.61419e-06	0.00178763
A_12_P100220	NM_076543	sulp-2	-2.3107	4.60596e-08	8.90277e-05
A_12_P144485	NM_064708	Y53F4B.23	-2.30862	0.000626598	0.0441561
A_12_P114642	NM_062234	bath-31	-2.30727	0.000621774	0.0439266
A_12_P165467	NM_001264469	che-13	-2.3047	3.01855e-05	0.00579453
A_12_P159278	NM_075909	C36C9.1	-2.30359	4.32036e-08	8.47601e-05
A_12_P171100	NM_073272	F15H10.8	-2.30294	0.0001698	0.0180714
A_12_P101121	NM_077707	R09A8.2	-2.30075	0.000579386	0.0417821
A_12_P115771	NM_071456	Y73C8C.10	-2.29935	0.000453913	0.0354789
A_12_P114063	NM_071164	F36F12.4	-2.29736	0.000585218	0.0421099
A_12_P165466	NM_001264469	che-13	-2.29612	0.000110214	0.0135
A_12_P131710	NM_001026570	spp-23	-2.29259	6.09777e-07	0.000485317
A_12_P104373	NM_078406	fbxa-120	-2.29043	7.78393e-08	0.000127213
A_12_P114173	NM_061457	fbxc-36	-2.29008	1.23615e-05	0.00339819
A_12_P117000	NM_001267388	pes-5	-2.28975	1.4797e-06	0.000879695
A_12_P155890	NM_065957	T12A2.3	-2.28933	7.20255e-05	0.0102618
A_12_P105907	NM_071703	cyp-34A10	-2.28916	5.11375e-07	0.000431949
A_12_P110097	NM_077807	R04D3.2	-2.28257	1.68261e-05	0.00411382
A_12_P163008	NM_077917	meg-2	-2.28085	0.000168482	0.0179592
A_12_P131713	NM_001026570	spp-23	-2.27857	1.87426e-07	0.000230537
A_12_P112774	NM_061513	lips-11	-2.27429	5.44324e-05	0.00855343
A_12_P131712	NM_001026570	spp-23	-2.2728	1.28127e-06	0.000794214
A_12_P117753	NM_077651	W06D11.1	-2.27046	2.20956e-06	0.00113776
A_12_P110424	NM_065053	Y46E12A.2	-2.26934	1.97902e-05	0.00450679
A_12_P144334	NM_001083306	Y41G9A.10	-2.26631	5.03327e-05	0.00817099
A_12_P108212	NM_171685	chtl-1	-2.26377	6.99774e-07	0.000531091
A_12_P103732	NM_072965	F21C10.4	-2.25935	5.95005e-05	0.00909407
A_12_P168467	NM_062211	F19B10.2	-2.25923	0.000396558	0.0323419
A_12_P165464	NM_001264469	che-13	-2.25537	9.97535e-05	0.0126587
A_12_P144332	NM_001083306	Y41G9A.10	-2.25446	8.91466e-05	0.01173
A_12_P106188	NM_068255	Y17G9A.2	-2.25303	0.00018712	0.0192454
A_12_P108634	NM_067946	grd-10	-2.25199	0.000184936	0.0191059
A_12_P140446	NM_065156	E02H9.7	-2.25148	1.81937e-05	0.0042969
A_12_P120111	NM_070526	F38C2.1	-2.24928	0.000133682	0.0154004
A_12_P118563	NM_060944	T04D3.5	-2.24558	6.16728e-06	0.0021491
A_12_P119917	NM_061844	F43C11.7	-2.23901	7.26594e-05	0.0103259
A_12_P177502	NM_078407	C33E10.1	-2.23774	0.00024025	0.022981
A_12_P168465	NM_062211	F19B10.2	-2.23522	0.000673705	0.046287
A_12_P149456	NM_061651	fbxa-184	-2.23493	0.000144343	0.0162258
A_12_P104459	NM_077579	F54F7.6	-2.23386	1.2106e-07	0.000171484
A_12_P132766	NM_071164	F36F12.4	-2.22764	0.000243392	0.0231517
A_12_P114407	NM_070729	cyp-29A3	-2.2264	2.35828e-06	0.00118632
A_12_P138500	NM_001028603	srz-97	-2.22547	8.13134e-05	0.0110975
A_12_P116448	NM_075237	Y69H2.2	-2.22358	0.000334744	0.0289304
A_12_P131571	NM_001083252	Y37A1A.4	-2.22343	2.97753e-05	0.00574837
A_12_P168504	NM_064434	E01G4.5	-2.22314	0.00010087	0.0127181
A_12_P172693	NM_071456	Y73C8C.10	-2.22309	5.81711e-06	0.00208229
A_12_P156230	NM_001026410	hlh-2	-2.21986	2.77859e-06	0.00132472
A_12_P110215	NM_077917	meg-2	-2.21181	0.000123395	0.0146055
A_12_P146929	NM_071823	Y47D7A.11	-2.20927	3.40488e-06	0.00150845
A_12_P133971	NM_001029761	VB0395L.1	-2.20465	2.11397e-06	0.00110744
A_12_P109075	NM_063226	B0228.6	-2.20392	1.53344e-05	0.00390879
A_12_P118012	NM_065842	SR-famA	-2.20389	9.65185e-07	0.000660933
A_12_P101481	NM_071967	srab-3	-2.20032	6.31324e-06	0.00217907
A_12_P110483	NM_072409	ugt-40	-2.19895	0.000116101	0.0140084
A_12_P156231	NM_001026410	hlh-2	-2.19663	2.70793e-06	0.00130371
A_12_P112290	NM_061670	fbxb-53	-2.19499	5.62643e-06	0.00202686
A_12_P177754	NM_077370	F57C7.1	-2.19311	8.26079e-07	0.000594768
A_12_P100007	NM_063696	cutl-2	-2.19298	5.41965e-05	0.00853323
A_12_P100379	NM_058892	C24G7.4	-2.189	3.94105e-06	0.00164158
A_12_P105733	NM_171535	T21C9.3	-2.18867	0.000204618	0.020518
A_12_P168200	NM_077557	C44C10.3	-2.18127	1.32903e-06	0.000814293
A_12_P140447	NM_065156	E02H9.7	-2.17686	9.07885e-06	0.0027939
A_12_P103321	NM_066832	T16G12.8	-2.17059	9.67885e-06	0.00289619
A_12_P112152	NM_071534	C04E12.5	-2.16045	1.79231e-05	0.00426474
A_12_P159675	NM_069474	ech-9	-2.15912	0.00072636	0.0488049
A_12_P116167	NM_058905	E01A2.7	-2.15651	1.3737e-05	0.00364032
A_12_P102645	NM_072921	str-87	-2.15528	0.000214955	0.0211823
A_12_P100859	NM_069798	ttr-50	-2.1551	7.20793e-05	0.0102657
A_12_P150110	NM_001029383	F11D5.7	-2.15371	0.000123198	0.0145916
A_12_P100692	NM_076782	tsp-16	-2.15155	1.79167e-05	0.00426474
A_12_P171099	NM_073272	F15H10.8	-2.14538	7.75558e-06	0.00251093
A_12_P112417	NM_075351	F55C9.3	-2.14299	9.84055e-05	0.0125482
A_12_P115013	NM_066272	flt-1	-2.14263	2.3372e-07	0.000265814
A_12_P112379	NM_072247	cpt-6	-2.1405	0.000488002	0.0372215
A_12_P146928	NM_071823	Y47D7A.11	-2.13915	6.40063e-05	0.00950946
A_12_P117507	NM_075781	sms-2	-2.13889	9.519e-07	0.000654119
A_12_P110532	NM_068326	C24D10.5	-2.13834	5.10262e-05	0.00823457
A_12_P158131	NM_065193	H19M22.3	-2.13793	0.000410399	0.0331324
A_12_P131711	NM_001026570	spp-23	-2.13193	4.96245e-06	0.00187767
A_12_P178746	NM_001029365	F08F1.4	-2.12673	8.80439e-06	0.00272877
A_12_P178747	NM_001029365	F08F1.4	-2.12379	3.08775e-06	0.00141372
A_12_P181490	NM_069972	ugt-65	-2.11463	0.00038902	0.0319067
A_12_P119766	NM_064525	Y39G8B.2	-2.11373	9.19727e-08	0.000141521
A_12_P131562	NM_076192	ZK813.3	-2.11215	0.000725462	0.0487754
A_12_P100050	NM_075941	ceh-39	-2.11162	6.60593e-08	0.000112656
A_12_P107802	NM_074588	pzf-1	-2.11131	2.9456e-06	0.00137103
A_12_P107207	NM_060939	T04D3.1	-2.11024	3.77359e-06	0.00160181
A_12_P112049	NM_001026207	C06H2.7	-2.10908	9.92092e-05	0.0126141
A_12_P101198	NM_070502	Y105C5B.14	-2.10745	4.1138e-05	0.00711689
A_12_P111903	NM_061459	fbxc-32	-2.10566	0.000101318	0.0127379
A_12_P173127	NM_078407	C33E10.1	-2.09142	3.37472e-05	0.00621511
A_12_P115368	NM_075615	T03D8.7	-2.08964	0.000192751	0.0196502
A_12_P114793	NM_063288	T05H10.4	-2.08634	3.16023e-05	0.00596438
A_12_P173128	NM_078407	C33E10.1	-2.08077	8.97571e-06	0.00276657
A_12_P138900	NM_001038410	R09E12.9	-2.07956	0.000663021	0.0457855
A_12_P103715	NM_001047538	Y105C5A.8	-2.07899	0.000629376	0.0442638
A_12_P103118	NM_077604	C49F5.3	-2.07484	0.000355186	0.0300867
A_12_P131560	NM_076192	ZK813.3	-2.07479	0.000646482	0.0450557
A_12_P159965	NM_001268528	dhs-31	-2.07454	1.21848e-06	0.000766187
A_12_P109263	NM_001047653	fbxa-143	-2.07384	9.37634e-05	0.0121181
A_12_P168059	NM_062192	Y49F6A.1	-2.07172	3.39145e-06	0.00150705
A_12_P104101	NM_073063	C50F4.6	-2.06722	3.77829e-06	0.00160181
A_12_P177820	NM_075968	Y40A1A.3	-2.06623	0.0004446	0.0350512
A_12_P104254	NM_062196	M151.7	-2.06435	0.000258141	0.0240847
A_12_P100003	NM_075964	F52D2.6	-2.06279	8.52357e-05	0.0114406
A_12_P166215	NM_073570	acl-10	-2.06078	0.000434683	0.0345541
A_12_P106739	NM_063401	W01C9.1	-2.05965	4.63956e-05	0.0077203
A_12_P130422	NM_073044	nas-3	-2.05831	0.000152576	0.0168213
A_12_P106832	NM_069654	hrg-4	-2.05694	6.65602e-07	0.000516138
A_12_P105558	NM_061645	F58E1.13	-2.05691	1.9164e-06	0.00103148
A_12_P105548	NM_059220	pup-3	-2.05639	6.67316e-05	0.00975916
A_12_P137891	NM_001026045	fbxb-87	-2.05346	3.15644e-05	0.0059601
A_12_P172912	NM_001028217	T13H10.2	-2.05242	4.80615e-05	0.00792692
A_12_P115768	NM_065648	flh-2	-2.05098	0.000128356	0.0149803
A_12_P178745	NM_001029365	F08F1.4	-2.04418	5.61032e-07	0.000462469
A_12_P158271	NM_001129027	M04C9.1	-2.04371	1.27802e-06	0.000793454
A_12_P101942	NM_076513	F35C8.8	-2.04325	2.78011e-05	0.00550069
A_12_P177562	NM_072563	C50E3.11	-2.03548	0.000377312	0.0312469
A_12_P106787	NM_001029412	F15G9.6	-2.0326	9.36485e-07	0.000644655
A_12_P171098	NM_073272	F15H10.8	-2.03224	0.000215239	0.0211984
A_12_P168199	NM_077557	C44C10.3	-2.02588	2.2872e-06	0.00116249
A_12_P130919	NM_001129169	T19H5.7	-2.02389	0.000199392	0.0201433
A_12_P109349	NM_064337	sra-14	-2.01694	0.000226805	0.0220661
A_12_P117195	NM_068020	cal-3	-2.01547	6.71026e-06	0.00227824
A_12_P181089	NM_077918	meg-1	-2.01112	4.85217e-05	0.00797266
A_12_P118088	NM_001029456	F34H10.5	-2.00951	0.000282499	0.0256113
A_12_P150111	NM_001029383	F11D5.7	-2.0064	0.000309393	0.0273464
A_12_P114167	NM_070590	clec-193	-2.00576	0.000436771	0.0346568
A_12_P119002	NM_071389	C31B8.8	-1.99944	1.39476e-05	0.00367789
A_12_P149866	NM_001038461	F53B1.9	-1.99932	0.000101027	0.0127217
A_12_P178744	NM_001029365	F08F1.4	-1.99761	3.23618e-05	0.00604954
A_12_P108696	NM_073624	kmo-1	-1.99664	2.10225e-07	0.000247709
A_12_P114045	NM_067105	tbx-33	-1.99654	4.32876e-05	0.00735443
A_12_P162623	NM_068255	Y17G9A.2	-1.99483	0.000559054	0.0407731
A_12_P107609	NM_078069	F31F6.3	-1.99359	0.000662351	0.0457634
A_12_P162273	NM_059530	W02D3.1	-1.9928	0.000132769	0.0153176
A_12_P115976	NM_063537	hlh-3	-1.98774	1.70469e-05	0.004134
A_12_P178748	NM_001029365	F08F1.4	-1.98605	0.000732541	0.0490853
A_12_P105501	NM_072335	col-142	-1.98572	0.000544409	0.0400739
A_12_P108962	NM_076653	mom-1	-1.98567	2.24594e-07	0.000260019
A_12_P102635	NM_070325	F02H6.3	-1.98411	4.28473e-06	0.00172453
A_12_P159890	NM_070325	F02H6.3	-1.97962	0.000360266	0.0303451
A_12_P115227	NM_062192	Y49F6A.1	-1.97789	2.7783e-07	0.000292261
A_12_P171101	NM_073272	F15H10.8	-1.97725	2.1165e-05	0.00464793
A_12_P107044	NM_072630	F40A3.2	-1.96936	1.432e-05	0.00373182
A_12_P108430	NM_067068	Y47D3B.4	-1.96682	7.64531e-06	0.00248949
A_12_P172768	NM_070456	Y73F8A.22	-1.96599	0.000339446	0.0291828
A_12_P138290	NM_070326	F02H6.3	-1.96353	3.25269e-05	0.00606306
A_12_P106165	NM_060602	T02G6.5	-1.96344	0.000202754	0.0204066
A_12_P151337	NM_061253	C23H3.9	-1.95643	4.46953e-05	0.00751708
A_12_P130917	NM_001129169	T19H5.7	-1.95479	8.47893e-06	0.00265729
A_12_P102420	NM_063146	C07D10.5	-1.95011	2.48925e-06	0.00121938
A_12_P149162	NM_001027383	F30H5.5	-1.94982	0.000280886	0.0255122
A_12_P104448	NM_001028527	C34B4.5	-1.94935	0.000180444	0.0187852
A_12_P101288	NM_062122	bath-10	-1.94605	9.09169e-07	0.000629397
A_12_P157896	NM_065193	H19M22.3	-1.94559	0.000448855	0.0352261
A_12_P114086	NM_077008	R09F10.8	-1.94204	9.9332e-05	0.0126216
A_12_P162919	NM_182344	ugt-39	-1.94151	0.000599326	0.0427954
A_12_P118296	NM_072221	F13H6.4	-1.9406	7.12333e-05	0.0101957
A_12_P160713	NM_061336	W10D9.2	-1.93306	0.000452529	0.0354176
A_12_P112252	NM_066952	Y39A1A.16	-1.92733	0.000586864	0.0422128
A_12_P156226	NM_072262	twk-10	-1.92373	0.000287454	0.025893
A_12_P113891	NM_077695	lips-1	-1.92364	0.000522197	0.039095
A_12_P110399	NM_063842	E04D5.4	-1.92109	0.000151331	0.0167216
A_12_P179180	NM_065602	fkh-5	-1.91946	6.72213e-07	0.000519212
A_12_P118205	NM_070652	Y116A8B.1	-1.91944	5.49568e-07	0.000455892
A_12_P115613	NM_072180	ceh-49	-1.9184	0.000264118	0.0244476
A_12_P118220	NM_076194	ZK813.1	-1.91755	6.58458e-05	0.00968375
A_12_P116463	NM_074598	F36G9.3	-1.91723	0.000539706	0.0398884
A_12_P101822	NM_071045	cdc-25.2	-1.91546	2.80184e-06	0.00132614
A_12_P107687	NM_071968	ugt-63	-1.91497	3.93986e-05	0.00692919
A_12_P177769	NM_059268	C04F1.1	-1.91462	3.07801e-05	0.00586563
A_12_P109576	NM_076566	tag-294	-1.91409	7.78916e-08	0.000127213
A_12_P115978	NM_061638	fbxb-26	-1.91382	0.000490018	0.0373414
A_12_P102455	NM_066885	tbx-9	-1.91261	1.88857e-05	0.00439006
A_12_P158321	NM_001129027	M04C9.1	-1.9121	2.6043e-06	0.00126782
A_12_P178734	NM_001029383	F11D5.7	-1.90994	0.000196997	0.0199527
A_12_P142776	NM_065030	Y22D7AL.11	-1.90884	4.96433e-07	0.000425126
A_12_P102552	NM_078301	C10E2.4	-1.906	6.59214e-05	0.00969124
A_12_P108335	NM_072614	ZK742.4	-1.90562	1.21089e-05	0.00337093
A_12_P108119	NM_061255	C50D2.6	-1.90446	2.81678e-06	0.00133
A_12_P109276	NM_072827	oac-29	-1.90332	0.000611589	0.0434339
A_12_P102167	NM_063267	ZK669.2	-1.9011	4.88497e-05	0.00800755
A_12_P172547	NM_077049	utx-1	-1.90072	9.16406e-06	0.0027939
A_12_P109668	NM_075287	cyp-42A1	-1.90049	0.000260289	0.0242188
A_12_P119287	NM_001129547	ugt-9	-1.89711	7.18861e-05	0.0102457
A_12_P106133	NM_067742	egl-18	-1.89398	1.31842e-05	0.00354427
A_12_P114526	NM_078206	csb-1	-1.8911	5.16422e-06	0.0019225
A_12_P172548	NM_077049	utx-1	-1.8899	4.60964e-05	0.00768356
A_12_P101733	NM_068193	F19C7.3	-1.88794	1.0971e-05	0.00315598
A_12_P158322	NM_001129027	M04C9.1	-1.88198	5.61778e-06	0.00202686
A_12_P114932	NM_064434	E01G4.5	-1.88106	8.6674e-05	0.0115197
A_12_P105749	NM_001029365	F08F1.4	-1.87919	3.76085e-05	0.00670565
A_12_P114551	NM_069865	tbx-36	-1.87912	0.000658608	0.0455609
A_12_P138080	NM_075909	C36C9.1	-1.87874	4.35287e-05	0.00737142
A_12_P106972	NM_059726	lrp-1	-1.87849	0.000157651	0.0172163
A_12_P106403	NM_073299	F25D1.3	-1.87833	0.000575802	0.0416308
A_12_P115061	NM_071915	ugt-14	-1.8737	1.06045e-07	0.00015771
A_12_P130423	NM_073044	nas-3	-1.87318	0.000441075	0.0348293
A_12_P130173	NM_066927	rab-30	-1.87307	0.000158157	0.0172486
A_12_P130931	NM_076558	W01C8.5	-1.87163	5.58152e-08	0.000100002
A_12_P145125	NM_001038376	B0238.15	-1.86538	0.000370699	0.0308555
A_12_P142906	NM_075966	gei-12	-1.86494	9.89592e-06	0.00294383
A_12_P114665	NM_077410	pgp-8	-1.8641	0.000608278	0.0432535
A_12_P111984	NM_001038450	F08C6.2	-1.86231	2.5786e-07	0.000280869
A_12_P177359	NM_001029196	spr-3	-1.86221	3.50942e-06	0.00153291
A_12_P118856	NM_078411	C53C11.1	-1.8554	1.32793e-05	0.00355422
A_12_P104338	NM_066177	F37C12.10	-1.85519	8.13026e-06	0.00258727
A_12_P103180	NM_068087	F49F1.7	-1.85425	9.92467e-07	0.000676075
A_12_P172914	NM_001028217	T13H10.2	-1.85389	2.43584e-05	0.00508656
A_12_P172856	NM_058790	T28F2.2	-1.85082	6.11396e-06	0.00214461
A_12_P144449	NM_075920	Y75D11A.3	-1.84728	7.92342e-08	0.000127601
A_12_P144445	NM_075920	Y75D11A.3	-1.84409	5.4923e-06	0.00200225
A_12_P117021	NM_075909	C36C9.1	-1.84199	3.53633e-06	0.00153886
A_12_P110885	NM_069446	gst-2	-1.8404	2.74272e-06	0.00131425
A_12_P107643	NM_068238	Y17G9B.1	-1.83974	0.000162357	0.0175447
A_12_P142274	NM_001029139	her-1	-1.8391	0.00025341	0.0237818
A_12_P132310	NM_066335	F54H12.5	-1.83802	2.42452e-05	0.005071
A_12_P115580	NM_065678	C45G9.12	-1.83487	9.6534e-05	0.0123581
A_12_P119505	NM_077795	K08H2.3	-1.8328	2.38418e-06	0.00119019
A_12_P135746	NM_067742	egl-18	-1.83268	6.3181e-05	0.00944337
A_12_P114961	NM_078365	sdz-2	-1.82382	0.000110707	0.013545
A_12_P142273	NM_001029139	her-1	-1.82354	0.000371609	0.0309182
A_12_P115603	NM_075955	rgs-8.2	-1.82319	0.00015052	0.0166695
A_12_P153740	NM_075940	ceh-21	-1.82308	2.35028e-07	0.000266399
A_12_P151266	NM_072939	srsx-34	-1.82007	6.67727e-07	0.000516764
A_12_P102101	NM_061511	T13B5.9	-1.81989	0.000310916	0.0274271
A_12_P131570	NM_001083252	Y37A1A.4	-1.81955	6.45262e-05	0.00955383
A_12_P178215	NM_059618	taf-11.2	-1.81954	1.39997e-05	0.00367977
A_12_P144448	NM_075920	Y75D11A.3	-1.81847	3.01429e-05	0.00579203
A_12_P144446	NM_075920	Y75D11A.3	-1.81782	4.15061e-06	0.00169469
A_12_P171217	NM_075751	T04G9.7	-1.81769	4.16781e-06	0.00169642
A_12_P153741	NM_075940	ceh-21	-1.8173	6.63231e-08	0.000112656
A_12_P142775	NM_065030	Y22D7AL.11	-1.81654	3.78506e-06	0.00160212
A_12_P110901	NM_077607	C49F5.7	-1.81444	0.000205107	0.0205359
A_12_P130930	NM_076558	W01C8.5	-1.81083	2.32701e-06	0.00117511
A_12_P108367	NM_068232	Y17G9B.6	-1.81032	0.000270288	0.0248603
A_12_P134551	NM_001047244	Y71A12B.12	-1.80948	5.82065e-07	0.000471752
A_12_P151140	NM_076545	F14D12.1	-1.80778	5.10942e-08	9.32724e-05
A_12_P117726	NM_064513	W02B8.2	-1.8072	1.38826e-06	0.00083674
A_12_P167799	NM_064007	T05B9.2	-1.80514	0.000409036	0.0330714
A_12_P119280	NM_075635	F25C8.1	-1.80346	0.000152894	0.0168421
A_12_P172854	NM_058790	T28F2.2	-1.80256	1.49604e-05	0.00384924
A_12_P171058	NM_073539	F35B12.9	-1.80018	7.50494e-06	0.00245806
A_12_P172855	NM_058790	T28F2.2	-1.79988	1.55469e-06	0.00091184
A_12_P100677	NM_075966	gei-12	-1.79978	2.36778e-06	0.00118654
A_12_P158642	NM_001029366	F08F1.4	-1.79756	9.46671e-05	0.0121987
A_12_P130509	NM_077441	egl-15	-1.79748	3.75742e-05	0.00670565
A_12_P141136	NM_001264693	M04D5.1	-1.79744	2.16085e-07	0.000252341
A_12_P110682	NM_069415	dhs-31	-1.79629	3.05409e-05	0.00584275
A_12_P119483	NM_077138	C25A11.2	-1.79227	3.51666e-06	0.00153316
A_12_P163269	NM_078173	K09E9.3	-1.79188	2.82768e-06	0.0013321
A_12_P135749	NM_067742	egl-18	-1.78764	8.64371e-05	0.0115172
A_12_P118762	NM_072465	F10G2.2	-1.7874	0.000300363	0.0267185
A_12_P102674	NM_062236	F12E12.3	-1.78489	1.57357e-06	0.000920164
A_12_P179940	NM_072753	mom-2	-1.78349	2.64284e-06	0.0012808
A_12_P118684	NM_171053	gst-34	-1.78046	0.000138021	0.0157374
A_12_P130171	NM_066927	rab-30	-1.77881	7.41051e-05	0.0104331
A_12_P140032	NM_063059	T02G5.11	-1.7783	4.1953e-07	0.00038461
A_12_P100215	NM_064362	cyd-1	-1.77671	3.26406e-06	0.00147053
A_12_P144447	NM_075920	Y75D11A.3	-1.77434	1.7172e-06	0.00096969
A_12_P104479	NM_075691	nrde-3	-1.7727	4.15612e-07	0.000383708
A_12_P158640	NM_001029365	F08F1.4	-1.77188	4.93083e-05	0.00803795
A_12_P101064	NM_076591	C46F4.1	-1.76929	1.75617e-06	0.000978803
A_12_P106595	NM_061254	C23H3.9	-1.76823	0.000129315	0.0150475
A_12_P114962	NM_071821	Y47D7A.9	-1.76699	0.000280107	0.0254651
A_12_P135745	NM_067742	egl-18	-1.76374	3.29868e-05	0.00613421
A_12_P120266	NM_001028767	acs-1	-1.76197	9.30084e-05	0.0120557
A_12_P154635	NM_001029147	ZK697.14	-1.7605	5.73375e-05	0.00886788
A_12_P133310	NM_001038451	F08C6.2	-1.76026	7.1813e-07	0.000541877
A_12_P138901	NM_001038410	R09E12.9	-1.75948	0.000205052	0.0205359
A_12_P109130	NM_075939	ceh-41	-1.75652	6.84501e-05	0.00992172
A_12_P103498	NM_075885	F09E10.1	-1.7549	2.03826e-05	0.00456486
A_12_P130175	NM_066927	rab-30	-1.75185	9.97367e-05	0.0126587
A_12_P115300	NM_076833	T08A9.4	-1.75129	0.000137128	0.0156713
A_12_P140256	NM_001083288	C54D2.6	-1.75096	3.43327e-05	0.00628326
A_12_P108782	NM_075213	ZK228.3	-1.75083	4.64734e-06	0.00179202
A_12_P108498	NM_068456	C45E5.1	-1.74824	3.36509e-07	0.000336561
A_12_P148965	NM_076601	inx-3	-1.74562	0.000135434	0.0155428
A_12_P111760	NM_077049	utx-1	-1.74339	2.05801e-06	0.00108683
A_12_P110862	NM_059618	taf-11.2	-1.74179	4.98317e-06	0.00187826
A_12_P110791	NM_078173	K09E9.3	-1.74174	4.25999e-06	0.0017179
A_12_P159105	NM_063774	die-1	-1.74062	0.000516477	0.0387556
A_12_P116957	NM_078046	C05G5.1	-1.74055	1.20282e-05	0.00336415
A_12_P158641	NM_001029365	F08F1.4	-1.73712	0.000253326	0.0237818
A_12_P176075	NM_182331	R08E5.2	-1.73632	2.43942e-05	0.00508687
A_12_P114595	NM_069751	cyp-31A2	-1.73508	1.57759e-05	0.00397055
A_12_P105217	NM_074777	F36D3.1	-1.73231	5.20263e-05	0.00833114
A_12_P100739	NM_070240	fbxa-215	-1.73174	2.22709e-05	0.00479207
A_12_P142582	NM_061987	Y110A2AL.2	-1.72978	0.000346778	0.0296248
A_12_P139640	NM_001047325	K05F6.11	-1.72814	5.42835e-05	0.0085403
A_12_P104930	NM_078098	fbxa-97	-1.72767	6.07761e-06	0.00213877
A_12_P111401	NM_076601	inx-3	-1.72614	4.33836e-05	0.00735955
A_12_P102773	NM_074038	T22G5.1	-1.72361	0.00013233	0.0152895
A_12_P145370	NM_001026182	srx-115	-1.72357	0.000348302	0.0297356
A_12_P142270	NM_001029139	her-1	-1.72323	0.000611923	0.0434497
A_12_P100062	NM_059268	C04F1.1	-1.72302	5.61328e-05	0.00874012
A_12_P114397	NM_060922	ZK1053.4	-1.72047	2.46212e-05	0.00511692
A_12_P133970	NM_001029761	VB0395L.1	-1.72023	1.78268e-05	0.00426087
A_12_P117243	NM_059170	F55A12.6	-1.71985	1.62976e-05	0.00403455
A_12_P109377	NM_060683	sdz-14	-1.71683	0.000635011	0.0445251
A_12_P102719	NM_076278	T22B2.2	-1.71656	7.02719e-05	0.0101074
A_12_P130172	NM_066927	rab-30	-1.7163	0.00031149	0.0274715
A_12_P105567	NM_075738	lgc-32	-1.71557	2.75711e-07	0.000290812
A_12_P116485	NM_061448	fbxc-33	-1.7155	4.01773e-05	0.00699714
A_12_P111550	NM_077689	T18D3.5	-1.71476	2.5218e-05	0.00519211
A_12_P109670	NM_001029366	F08F1.4	-1.70934	5.6903e-05	0.00881457
A_12_P172434	NM_066492	C06E1.1	-1.70541	5.15727e-05	0.00829338
A_12_P143091	NM_001129487	F57B1.9	-1.70455	0.000683424	0.0467664
A_12_P111555	NM_077328	F41E7.6	-1.70131	6.30636e-05	0.00943369
A_12_P114236	NM_070105	scl-5	-1.69871	0.000544105	0.0400625
A_12_P111673	NM_077555	C44C10.4	-1.69863	1.35581e-06	0.000822237
A_12_P158270	NM_001129027	M04C9.1	-1.69793	2.26983e-06	0.00115651
A_12_P103714	NM_070185	Y62E10A.17	-1.69762	1.0432e-05	0.00304784
A_12_P135676	NM_060790	F33E2.5	-1.6935	5.77518e-06	0.00206944
A_12_P102441	NM_071672	C17E7.9	-1.69314	7.11959e-05	0.0101957
A_12_P116106	NM_060333	Y106G6H.9	-1.69012	0.000182581	0.0189625
A_12_P102216	NM_078137	Y15E3A.3	-1.68804	7.37235e-05	0.0104129
A_12_P169014	NM_059918	rskn-1	-1.68751	2.64226e-05	0.00534136
A_12_P116131	NM_063064	T02G5.1	-1.68427	2.61227e-05	0.00530258
A_12_P101505	NM_063757	sdz-38	-1.68295	4.60046e-05	0.00767477
A_12_P113850	NM_076545	F14D12.1	-1.67888	1.33693e-07	0.000184327
A_12_P112763	NM_078221	nhx-1	-1.67676	8.1667e-05	0.0111226
A_12_P116234	NM_063059	T02G5.11	-1.67641	1.63598e-05	0.00403991
A_12_P163272	NM_078173	K09E9.3	-1.67611	3.63656e-06	0.00156115
A_12_P110436	NM_066573	glb-1	-1.67484	0.000195191	0.0198158
A_12_P163069	NM_071045	cdc-25.2	-1.67392	2.46122e-06	0.00121866
A_12_P115018	NM_073841	R186.6	-1.67354	5.98308e-07	0.000477157
A_12_P144095	NM_001128968	E01A2.10	-1.67116	4.24119e-05	0.00725583
A_12_P100351	NM_078213	F31B9.3	-1.67085	1.82006e-05	0.0042969
A_12_P163294	NM_070470	Y105C5A.1	-1.67053	0.00071027	0.0480257
A_12_P177255	NM_067068	Y47D3B.4	-1.66689	0.000227691	0.0221304
A_12_P100493	NM_071535	C04E12.4	-1.66323	2.81354e-05	0.00553364
A_12_P168025	NM_058646	W03D8.8	-1.66226	4.38765e-06	0.00173813
A_12_P118284	NM_058474	mab-20	-1.66216	6.251e-05	0.00938093
A_12_P118600	NM_066508	dpy-19	-1.65937	4.56266e-07	0.000403215
A_12_P172853	NM_058790	T28F2.2	-1.65605	2.82464e-05	0.00554159
A_12_P102536	NM_059373	T09B4.5	-1.65484	0.000361593	0.0304333
A_12_P114273	NM_077355	C33D3.3	-1.6545	2.38988e-05	0.00502856
A_12_P163230	NM_075781	sms-2	-1.65443	9.36513e-06	0.00283319
A_12_P112449	NM_077080	M02D8.3	-1.65262	3.7344e-07	0.000353328
A_12_P100732	NM_065862	alh-9	-1.65227	9.09508e-07	0.000629397
A_12_P150815	NM_072753	mom-2	-1.65224	3.12137e-06	0.00142082
A_12_P100131	NM_075159	F16H6.5	-1.65193	1.01312e-06	0.000685385
A_12_P149867	NM_001038461	F53B1.9	-1.65113	6.13092e-05	0.00927483
A_12_P181489	NM_069972	ugt-65	-1.64997	0.000600887	0.0428756
A_12_P103753	NM_001083258	Y40H7A.4	-1.64859	5.29873e-06	0.00195403
A_12_P141775	NM_076088	C14A11.6	-1.64675	2.6015e-07	0.000280869
A_12_P111145	NM_075919	Y75D11A.2	-1.64226	0.000709244	0.0479893
A_12_P100860	NM_078331	F39F10.4	-1.63853	0.000224624	0.0218919
A_12_P163268	NM_078173	K09E9.3	-1.6381	2.77246e-06	0.00132463
A_12_P117385	NM_067124	srd-74	-1.6363	0.00039492	0.0322491
A_12_P150625	NM_001129663	F19C6.4	-1.63447	2.29677e-07	0.000263394
A_12_P141776	NM_076088	C14A11.6	-1.63403	2.09116e-06	0.00109842
A_12_P176074	NM_182331	R08E5.2	-1.63303	2.47277e-05	0.00513091
A_12_P113310	NM_001026309	F52B5.7	-1.63303	1.33893e-05	0.00357878
A_12_P118881	NM_001047819	R11G1.7	-1.63296	2.52305e-05	0.00519211
A_12_P159795	NM_078206	csb-1	-1.63184	3.80425e-06	0.00160504
A_12_P139166	NM_067525	daf-18	-1.63171	1.69129e-06	0.000962843
A_12_P117170	NM_066269	fbn-1	-1.63018	0.0005665	0.041163
A_12_P101590	NM_062853	F13H8.3	-1.62891	9.25583e-06	0.00281314
A_12_P100281	NM_001028138	zen-4	-1.62781	7.53562e-06	0.0024645
A_12_P106343	NM_073541	F35B12.3	-1.62671	0.000667851	0.0460056
A_12_P175233	NM_001047343	math-42	-1.62526	0.00018706	0.0192443
A_12_P106252	NM_077557	C44C10.3	-1.62517	7.39374e-05	0.0104189
A_12_P102624	NM_075920	Y75D11A.3	-1.62437	7.31474e-06	0.00241079
A_12_P110499	NM_001028683	F26D2.3	-1.62337	0.000103452	0.0129438
A_12_P177735	NM_071643	R08E5.1	-1.62226	3.61591e-06	0.00155911
A_12_P140255	NM_001083288	C54D2.6	-1.622	8.45274e-06	0.00265544
A_12_P117567	NM_077058	H35N09.2	-1.62047	8.28769e-07	0.000594768
A_12_P157731	NM_075190	C08E8.1	-1.61911	0.000509676	0.0383773
A_12_P112875	NM_071083	Y46H3C.5	-1.61676	0.000277028	0.0252554
A_12_P114587	NM_069487	pqn-55	-1.61396	1.31311e-05	0.00353599
A_12_P163270	NM_078173	K09E9.3	-1.60969	3.36465e-05	0.0062069
A_12_P112430	NM_066591	zif-1	-1.60692	5.23917e-06	0.00194116
A_12_P161165	NM_062231	C46E10.8	-1.60214	2.01786e-05	0.00454602
A_12_P163271	NM_078173	K09E9.3	-1.60133	9.60791e-07	0.000659075
A_12_P132820	NM_077441	egl-15	-1.59966	2.52488e-05	0.00519234
A_12_P110472	NM_067269	Y37D8A.4	-1.5986	9.02939e-07	0.000627063
A_12_P173032	NM_070185	Y62E10A.17	-1.59754	4.06757e-06	0.00167523
A_12_P101105	NM_062580	EGAP2.2	-1.59725	0.00037262	0.0309695
A_12_P174467	NM_075879	D1005.1	-1.59258	1.149e-06	0.000736666
A_12_P138902	NM_001038410	R09E12.9	-1.59132	0.000306919	0.0271845
A_12_P102318	NM_182065	F28B3.5	-1.59067	7.89574e-06	0.00253223
A_12_P113758	NM_059574	C48B6.9	-1.58994	2.02278e-07	0.000243113
A_12_P106709	NM_077576	F54F7.2	-1.58946	5.89037e-07	0.000474006
A_12_P163159	NM_059349	C27A12.9	-1.58543	3.03436e-06	0.00139593
A_12_P109959	NM_061842	ZK1240.1	-1.58023	1.61485e-05	0.00402851
A_12_P101314	NM_068240	R11E3.2	-1.57831	6.74445e-05	0.00981585
A_12_P115791	NM_067990	CC8.2	-1.57818	1.23658e-05	0.00339819
A_12_P152522	NM_001038352	Y54G2A.41	-1.57721	1.29426e-06	0.000800982
A_12_P130508	NM_001029555	egl-15	-1.57676	8.64432e-05	0.0115172
A_12_P103970	NM_075879	D1005.1	-1.57614	2.57926e-05	0.00526682
A_12_P179939	NM_072753	mom-2	-1.57474	4.30102e-07	0.00038894
A_12_P105574	NM_076045	fox-1	-1.57448	0.00010217	0.0128285
A_12_P163068	NM_071045	cdc-25.2	-1.57422	2.51898e-07	0.000279205
A_12_P117650	NM_171780	mes-1	-1.57348	2.47427e-06	0.00121866
A_12_P100198	NM_076832	T08A9.5	-1.57121	2.45087e-05	0.00510083
A_12_P171122	CB391685	C55A1.6	-1.57067	7.81037e-06	0.00252149
A_12_P115452	NM_071516	F35F10.12	-1.57033	4.73447e-06	0.00181415
A_12_P179275	NM_064517	sre-44	-1.56945	8.74314e-05	0.0115586
A_12_P132622	NM_001029504	F46H5.2	-1.56617	7.77479e-05	0.0107682
A_12_P111139	NM_062967	T14B4.5	-1.56599	5.15493e-06	0.00192086
A_12_P107419	NM_060790	F33E2.5	-1.56587	1.97619e-05	0.00450501
A_12_P174469	NM_075879	D1005.1	-1.56477	1.24412e-05	0.00341372
A_12_P118453	NM_075968	Y40A1A.3	-1.56433	8.38146e-06	0.00264363
A_12_P119423	NM_075569	F26F2.5	-1.56405	0.00062537	0.0440933
A_12_P160314	NM_066758	rmd-1	-1.56387	9.15173e-06	0.0027939
A_12_P172852	NM_058790	T28F2.2	-1.56352	0.000126228	0.0148098
A_12_P163229	NM_075781	sms-2	-1.56005	1.16159e-06	0.000742312
A_12_P178025	NM_066081	R05H11.1	-1.55909	7.57729e-05	0.0105956
A_12_P102387	NM_077932	C31E10.5	-1.5575	0.000112978	0.0137434
A_12_P102658	NM_062454	ttm-2	-1.5567	1.6165e-06	0.000932139
A_12_P171988	NM_001028207	T12G3.2	-1.55318	5.81217e-07	0.000471752
A_12_P169749	NM_066758	rmd-1	-1.55215	9.45796e-05	0.0121954
A_12_P116235	NM_171775	R08B4.4	-1.55193	0.000678475	0.0465333
A_12_P136885	NM_077195	gap-2	-1.549	7.07842e-06	0.00236173
A_12_P119715	NM_063994	lir-3	-1.54896	2.8382e-06	0.0013321
A_12_P109734	NM_001027900	C47E12.13	-1.54851	2.45185e-05	0.00510083
A_12_P103386	NM_068382	Y4C6B.3	-1.54835	2.00344e-05	0.00452891
A_12_P100723	NM_062882	clec-88	-1.54791	1.73677e-05	0.00418077
A_12_P107326	NM_069112	F20C5.6	-1.54636	0.000182704	0.0189656
A_12_P162229	NM_060175	rpl-14	-1.54311	0.000718265	0.0484326
A_12_P105650	NM_063079	gld-3	-1.5409	8.09625e-05	0.0110805
A_12_P117916	NM_064460	gst-14	-1.54076	5.12079e-05	0.00825162
A_12_P104368	NM_075559	Y38H6C.17	-1.54015	1.88803e-05	0.00439006
A_12_P101389	NM_074279	hil-1	-1.54004	5.36123e-06	0.00197152
A_12_P110310	NM_072742	W02D7.5	-1.53979	8.00715e-05	0.0110123
A_12_P147400	NM_062882	clec-88	-1.53854	1.1237e-05	0.00321129
A_12_P177244	NM_001083258	Y40H7A.4	-1.53781	7.45276e-06	0.00244301
A_12_P162918	NM_182344	ugt-39	-1.5364	0.000135433	0.0155428
A_12_P162460	NM_065696	K10D2.5	-1.53514	1.80515e-05	0.00428231
A_12_P161167	NM_062231	C46E10.8	-1.5346	0.000108011	0.0133356
A_12_P160313	NM_066758	rmd-1	-1.53441	2.26589e-05	0.00483791
A_12_P150626	NM_001129663	F19C6.4	-1.5336	1.08784e-05	0.00313623
A_12_P111747	NM_001028674	nhr-141	-1.53359	2.82025e-05	0.00553852
A_12_P104864	NM_077423	F47B10.9	-1.5326	0.000594116	0.0425628
A_12_P107742	NM_062624	EEED8.3	-1.53194	6.14343e-05	0.00927947
A_12_P130184	NM_062917	C56E6.2	-1.5319	0.000563348	0.0410176
A_12_P109302	NM_067353	F53A2.9	-1.53175	8.11803e-06	0.00258601
A_12_P108303	NM_073320	T21C9.13	-1.53014	5.60146e-06	0.00202569
A_12_P174637	NM_073408	pak-2	-1.53001	0.000155069	0.0170102
A_12_P104042	NM_063552	oac-54	-1.52874	1.63835e-05	0.00403991
A_12_P101566	NM_077379	M79.3	-1.52711	8.90564e-05	0.011726
A_12_P147401	NM_062882	clec-88	-1.52601	1.70497e-06	0.000966745
A_12_P169751	NM_066758	rmd-1	-1.52224	5.33947e-05	0.00844765
A_12_P113354	NM_077250	R07B1.3	-1.52205	0.000324644	0.0283576
A_12_P106203	NM_001028359	Y57G11C.46	-1.52098	1.63763e-05	0.00403991
A_12_P101407	NM_078459	F20B4.4	-1.52076	0.00030591	0.0271196
A_12_P119314	NM_069123	T28C6.3	-1.51953	0.000159149	0.0173173
A_12_P107888	NM_078063	C27C12.1	-1.51925	2.43898e-07	0.000273052
A_12_P140335	NM_001026058	C54C6.7	-1.51876	7.45756e-07	0.000558428
A_12_P118898	NM_063581	D2013.3	-1.51788	4.92248e-06	0.00186434
A_12_P107566	NM_070470	Y105C5A.1	-1.5178	3.95885e-05	0.00694391
A_12_P149868	NM_001038461	F53B1.9	-1.51738	0.000514849	0.038663
A_12_P100147	NM_077257	mrp-4	-1.51711	6.19489e-06	0.00215564
A_12_P101989	NM_077598	nfya-1	-1.51704	7.71451e-05	0.0107264
A_12_P110732	NM_060047	clec-91	-1.51623	8.23756e-06	0.00260662
A_12_P102803	NM_068727	skr-16	-1.51551	2.48959e-05	0.00515761
A_12_P109071	NM_001026412	dhp-1	-1.51546	0.000124576	0.01467
A_12_P174585	NM_069818	magi-1	-1.51444	0.000293443	0.0262517
A_12_P152210	NM_058749	W05F2.3	-1.51408	4.26201e-05	0.00727723
A_12_P171123	NM_074492	C55A1.6	-1.51402	0.000160849	0.0174298
A_12_P111579	NM_001028851	cdr-7	-1.51322	2.00733e-05	0.00452919
A_12_P131035	NM_001028941	cyb-3	-1.51255	1.30895e-05	0.00352872
A_12_P106689	NM_001029333	C55B6.1	-1.51253	1.57161e-05	0.0039614
A_12_P169748	NM_066758	rmd-1	-1.51216	4.3425e-05	0.00736021
A_12_P109492	NM_001129715	W01C8.5	-1.5119	4.53669e-06	0.0017776
A_12_P113697	NM_069717	gtl-2	-1.51139	4.9224e-05	0.00802754
A_12_P168024	NM_058646	W03D8.8	-1.51082	1.34394e-06	0.000818835
A_12_P109545	NM_063621	R09D1.13	-1.50977	0.000463138	0.0359564
A_12_P112275	NM_076381	C05E11.6	-1.50957	6.06381e-05	0.00918999
A_12_P111805	NM_076594	R07E4.5	-1.50871	7.80733e-07	0.000576145
A_12_P112476	NM_075709	B0310.3	-1.50836	0.000267048	0.0246548
A_12_P143000	NM_062213	F19B10.1	-1.50807	4.16073e-06	0.00169529
A_12_P109924	NM_001025842	C31H5.7	-1.50758	0.00017235	0.0182353
A_12_P138846	NM_001025909	DY3.8	-1.50592	1.03182e-06	0.000690582
A_12_P112810	NM_076323	F48D6.4	-1.50533	0.000391919	0.032082
A_12_P160310	NM_066758	rmd-1	-1.50447	0.000120085	0.0143304
A_12_P108628	NM_059659	ztf-2	-1.50426	5.46518e-05	0.00858104
A_12_P173102	NM_061219	set-10	-1.50413	1.32461e-05	0.00355052
A_12_P113050	NM_075511	mlt-4	-1.50399	0.000466547	0.036171
A_12_P179706	NM_065420	rnr-2	-1.50226	7.17506e-06	0.00238054
A_12_P180526	NM_066573	glb-1	-1.50064	0.000287925	0.0259116
A_12_P161163	NM_062231	C46E10.8	-1.50062	7.27922e-06	0.00240359
A_12_P172267	NM_078173	K09E9.3	-1.49924	1.13586e-05	0.00323193
A_12_P108549	NM_076125	twk-16	-1.49854	0.000498761	0.0378271
A_12_P107503	NM_078375	cnp-3	-1.49854	0.000135753	0.0155658
A_12_P118933	NM_063778	ZK945.4	-1.49755	3.26431e-06	0.00147053
A_12_P104456	NM_001129415	nhr-129	-1.49674	1.03924e-05	0.0030408
A_12_P174468	NM_075879	D1005.1	-1.49647	1.47513e-06	0.000878307
A_12_P163158	NM_059349	C27A12.9	-1.49639	1.71997e-05	0.00416289
A_12_P157915	NM_076321	F48D6.4	-1.49516	8.4544e-05	0.0113723
A_12_P105959	NM_077802	cyp-14A1	-1.49513	0.000177924	0.0186366
A_12_P151181	NM_001026904	F10C1.9	-1.49435	3.0917e-05	0.00588886
A_12_P102625	NM_059852	T01G9.3	-1.49416	0.000405967	0.032925
A_12_P118017	NM_070977	Y50D4B.3	-1.49366	3.32898e-05	0.00616719
A_12_P100620	NM_072601	T05B11.4	-1.493	0.00022388	0.0218356
A_12_P104976	NM_071804	F32D1.7	-1.49253	2.81107e-05	0.00553157
A_12_P101201	NM_063778	ZK945.4	-1.49087	1.45628e-05	0.00377417
A_12_P118658	NM_078212	F31B9.2	-1.49051	0.000242661	0.0231046
A_12_P104115	NM_067355	T03F6.6	-1.49039	2.38024e-06	0.00118974
A_12_P172913	NM_001028217	T13H10.2	-1.48913	0.000600348	0.0428528
A_12_P163228	NM_075781	sms-2	-1.48876	2.0034e-05	0.00452891
A_12_P178834	NM_061631	ZC204.2	-1.48787	1.45199e-05	0.00377051
A_12_P106411	NM_001028118	K08F4.12	-1.48758	1.1491e-05	0.00326014
A_12_P138125	NM_065862	alh-9	-1.48711	3.93644e-06	0.00164141
A_12_P101980	NM_061315	D1069.4	-1.48702	0.000681761	0.046696
A_12_P172432	NM_066492	C06E1.1	-1.48533	5.10868e-05	0.00823888
A_12_P178634	NM_059246	F46F11.10	-1.48467	1.64594e-05	0.00405161
A_12_P152523	NM_001038352	Y54G2A.41	-1.48379	4.45757e-05	0.00750338
A_12_P144187	NM_075674	Y73B3A.16	-1.48313	0.000558858	0.0407686
A_12_P161166	NM_062231	C46E10.8	-1.48282	4.02025e-06	0.00166397
A_12_P150175	NM_076147	F28B4.1	-1.4818	2.46635e-05	0.00512299
A_12_P132550	NM_071516	F35F10.12	-1.48146	3.54821e-06	0.00154008
A_12_P150016	NM_001027013	F49C5.9	-1.48062	0.000186936	0.0192416
A_12_P100717	NM_062244	T24E12.9	-1.48052	0.000105786	0.0131478
A_12_P174584	NM_069818	magi-1	-1.48015	0.00050012	0.0378978
A_12_P148227	NM_001026944	F26C11.4	-1.47958	0.000295949	0.0264014
A_12_P159290	NM_076560	cyp-43A1	-1.47829	0.00020047	0.0202316
A_12_P112472	NM_073541	dhs-20	-1.47643	1.44403e-05	0.00375731
A_12_P114433	NM_001028941	cyb-3	-1.47505	1.29627e-06	0.000800982
A_12_P106799	NM_069983	fibronectin	-1.47491	1.02376e-05	0.00301349
A_12_P107156	NM_064720	gst-31	-1.47482	4.59071e-06	0.0017873
A_12_P136651	NM_063778	ZK945.4	-1.47323	4.24056e-06	0.00171535
A_12_P107336	NM_077687	T18D3.1	-1.47317	4.17872e-05	0.00719766
A_12_P112381	NM_001026035	C36A4.9	-1.47294	5.45453e-06	0.00199768
A_12_P179669	NM_069100	F21D5.2	-1.47215	7.82579e-05	0.0108198
A_12_P142640	NM_001029077	Y46H3C.7	-1.47194	1.89492e-05	0.00439692
A_12_P156740	NM_068955	F42G8.8	-1.47185	0.000344322	0.0294599
A_12_P170313	NM_059445	san-1	-1.47175	9.48806e-05	0.0122142
A_12_P143471	NM_065355	F34D10.2	-1.47172	6.1477e-06	0.00214461
A_12_P104295	NM_074825	Y70C5C.1	-1.47167	0.000504444	0.0381444
A_12_P105306	NM_001029514	asna-2	-1.47163	0.000430881	0.0343315
A_12_P115714	NM_001026349	F58D5.9	-1.47049	7.07973e-07	0.000535243
A_12_P152524	NM_001038352	Y54G2A.41	-1.47048	3.13965e-05	0.0059427
A_12_P170778	NM_074884	fbxa-110	-1.46997	0.000162341	0.0175447
A_12_P110103	NM_069928	C42C1.2	-1.46973	5.05407e-05	0.00818392
A_12_P136991	NM_001029826	ZK563.7	-1.46815	0.000518321	0.0388716
A_12_P150816	NM_072753	mom-2	-1.46555	1.58103e-06	0.000923148
A_12_P177534	NM_001136308	F59C6.16	-1.46508	4.26931e-05	0.0072816
A_12_P166000	NM_077695	lips-1	-1.46346	0.000146528	0.0163747
A_12_P111099	NM_001047670	F58G11.3	-1.46224	0.000577609	0.041723
A_12_P103084	NM_182210	clec-88	-1.46191	0.000104629	0.0130468
A_12_P139801	NM_171245	eri-1	-1.46175	2.775e-06	0.00132463
A_12_P102178	NM_061836	ZK1240.5	-1.46149	4.15435e-05	0.00716826
A_12_P108647	NM_070713	elo-2	-1.46143	5.53944e-06	0.00201067
A_12_P115594	NM_072753	mom-2	-1.46016	1.47523e-05	0.00379819
A_12_P180485	NM_060067	gip-2	-1.46015	1.16396e-05	0.00328717
A_12_P111421	NM_076322	F48D6.4	-1.46006	0.000481755	0.0369269
A_12_P152212	NM_058749	W05F2.3	-1.46001	3.69716e-05	0.0066362
A_12_P113955	NM_001028211	aat-4	-1.45938	1.39815e-05	0.00367977
A_12_P161164	NM_062231	C46E10.8	-1.45881	3.30163e-06	0.00148394
A_12_P120264	NM_182332	R08E5.2	-1.45825	2.96887e-05	0.0057413
A_12_P107111	NM_066492	C06E1.1	-1.45786	0.000104439	0.0130341
A_12_P138845	NM_001025909	DY3.8	-1.45685	2.02266e-05	0.00454602
A_12_P118935	NM_075713	F28C10.3	-1.45668	9.9327e-06	0.00295202
A_12_P108307	NM_078344	F52G3.5	-1.45642	0.000749549	0.0498838
A_12_P101160	NM_063426	F28C6.10	-1.45461	6.18023e-05	0.00931424
A_12_P110552	NM_076135	mai-1	-1.45413	0.000137889	0.015728
A_12_P118112	NM_073307	F32G8.4	-1.45231	0.000216248	0.0212818
A_12_P115257	NM_066136	egg-2	-1.44938	3.90212e-06	0.0016323
A_12_P114255	NM_074202	C53A5.13	-1.44765	4.99464e-06	0.00188078
A_12_P116105	NM_076548	T22B7.4	-1.44763	1.58707e-05	0.00398418
A_12_P138374	NM_077106	cyn-8	-1.44373	7.90822e-06	0.00253223
A_12_P119596	NM_058320	Y48G1A.2	-1.44337	1.94567e-05	0.00446975
A_12_P100939	NM_001025854	imp-1	-1.44337	2.78276e-05	0.00550069
A_12_P100447	NM_069883	K08E4.2	-1.44239	7.91856e-06	0.00253223
A_12_P120258	NM_071059	nhr-237	-1.44023	4.59556e-06	0.0017873
A_12_P116154	NM_001029772	W05H9.4	-1.43994	4.51776e-07	0.000400148
A_12_P102791	NM_077916	ekl-5	-1.43794	6.65062e-07	0.000516138
A_12_P104312	NM_001029572	pdk-1	-1.43762	7.1742e-05	0.0102326
A_12_P106686	NM_068106	K08D10.1	-1.43738	0.000218426	0.0214316
A_12_P143440	NM_072763	F52E1.5	-1.43565	0.000345625	0.0295457
A_12_P144636	NM_181935	Y40D12A.1	-1.4356	8.5396e-05	0.0114437
A_12_P178214	NM_059618	taf-11.2	-1.43429	6.48411e-05	0.00959255
A_12_P111423	NM_182310	srg-48	-1.43404	0.000603132	0.0430123
A_12_P160311	NM_066758	rmd-1	-1.43287	0.000144485	0.0162258
A_12_P152211	NM_058749	W05F2.3	-1.4296	3.56193e-05	0.00644953
A_12_P109807	NM_001047612	B0507.3	-1.42955	7.38201e-05	0.0104145
A_12_P107593	NM_071543	C04E12.12	-1.42941	7.25127e-05	0.0103088
A_12_P104461	NM_061290	B0432.8	-1.42874	2.95106e-05	0.00571814
A_12_P100130	NM_065977	F47D12.5	-1.42819	1.09287e-05	0.00314841
A_12_P162778	NM_068134	F15E6.4	-1.42791	0.000607819	0.0432444
A_12_P153980	NM_064934	F58B6.1	-1.42697	0.000251243	0.0236633
A_12_P172433	NM_066492	C06E1.1	-1.42484	1.66432e-05	0.00407863
A_12_P110778	NM_076544	F14D12.1	-1.42108	1.95738e-05	0.00447901
A_12_P136650	NM_063778	ZK945.4	-1.41983	1.02297e-05	0.00301341
A_12_P157162	NM_001025988	cpg-1	-1.4198	0.000261837	0.0243315
A_12_P112696	NM_065552	srg-13	-1.41962	0.000295992	0.0264014
A_12_P132821	NM_077441	egl-15	-1.41835	0.000126998	0.0148749
A_12_P174582	NM_069818	magi-1	-1.4179	0.000642361	0.0448481
A_12_P119654	NM_061458	clec-43	-1.416	0.000341538	0.0293176
A_12_P160312	NM_066758	rmd-1	-1.41508	0.000110924	0.0135673
A_12_P112872	NM_001028196	T09A12.2	-1.41474	2.41001e-05	0.00504856
A_12_P157771	NM_060284	C25A1.12	-1.4141	1.27932e-05	0.00347386
A_12_P109581	NM_071914	ugt-8	-1.41368	0.000173917	0.0183443
A_12_P163231	NM_075781	sms-2	-1.41366	5.75164e-05	0.00888853
A_12_P116387	NM_070978	Y50D4B.2	-1.41313	1.03111e-05	0.00302604
A_12_P116531	NM_071798	mcm-7	-1.41272	3.09746e-05	0.00589411
A_12_P108921	NM_074646	F14H3.12	-1.41218	2.80854e-06	0.00132771
A_12_P163160	NM_059349	C27A12.9	-1.41033	1.63529e-05	0.00403991
A_12_P173538	NM_078206	csb-1	-1.40393	2.3025e-07	0.000263394
A_12_P150714	NM_001129487	F57B1.9	-1.40306	0.000468803	0.0363029
A_12_P111121	NM_072736	str-136	-1.40256	3.55898e-05	0.00644787
A_12_P179705	NM_065420	rnr-2	-1.4021	0.00013224	0.0152895
A_12_P101475	NM_182380	K07B1.4	-1.40206	8.06317e-05	0.0110622
A_12_P143441	NM_072763	F52E1.5	-1.40201	0.000235999	0.0227184
A_12_P108780	NM_064607	cysl-2	-1.40172	0.000138107	0.0157374
A_12_P177538	NM_001136308	F59C6.16	-1.40054	0.000258172	0.0240847
A_12_P177536	NM_001136308	F59C6.16	-1.39969	0.000395536	0.0322792
A_12_P110775	NM_182024	larp-5	-1.39925	0.000747776	0.0498063
A_12_P175047	NM_076093	tra-4	-1.39899	7.53783e-06	0.0024645
A_12_P105518	NM_065482	B0284.3	-1.39873	3.31559e-06	0.00148511
A_12_P115543	NM_001026361	H32K16.2	-1.39742	2.96257e-06	0.00137666
A_12_P132822	NM_077441	egl-15	-1.39652	0.000333487	0.0288729
A_12_P101784	NM_063469	F07H5.13	-1.39637	5.47716e-06	0.00199957
A_12_P144567	NM_071158	Y40B10A.7	-1.3959	2.02607e-07	0.000243113
A_12_P148766	NM_063204	F18A1.7	-1.39522	1.22692e-05	0.00339048
A_12_P147935	NM_059754	VH15N14R.1	-1.39427	2.26521e-05	0.00483791
A_12_P151265	NM_072939	srsx-34	-1.39424	7.25232e-07	0.000546153
A_12_P101222	NM_067769	C54E4.5	-1.39298	1.17437e-05	0.0033103
A_12_P109474	NM_072825	F41E6.12	-1.39125	0.000100631	0.0127164
A_12_P138541	NM_001047467	D2096.7	-1.38995	3.40801e-05	0.0062537
A_12_P114406	NM_182433	nhr-168	-1.38973	7.57203e-06	0.002469
A_12_P103040	NM_074011	oac-33	-1.38897	0.000573655	0.0415215
A_12_P133611	NM_001129246	T07A5.7	-1.38865	0.000139224	0.0157976
A_12_P151695	NM_067767	C23H5.1	-1.38861	7.72207e-06	0.00250616
A_12_P102854	NM_059968	C36B1.11	-1.38853	1.32474e-05	0.00355052
A_12_P116988	NM_077801	K09A11.1	-1.38647	1.95583e-05	0.00447901
A_12_P141595	NM_059642	C01H6.9	-1.38611	4.30695e-06	0.00172453
A_12_P172187	NM_001026264	F31C3.6	-1.38584	0.000540674	0.0399073
A_12_P100387	NM_060147	K07A1.15	-1.38582	0.000208882	0.0207809
A_12_P133125	NM_061692	fbxb-97	-1.38402	0.000115307	0.013941
A_12_P104839	NM_061184	let-49	-1.38385	0.000134195	0.0154459
A_12_P173539	NM_078206	csb-1	-1.38346	1.82631e-06	0.00100292
A_12_P130136	NM_078389	rab-6.2	-1.38324	0.000212332	0.0209931
A_12_P104356	NM_075422	W04E12.7	-1.38266	5.17124e-06	0.00192328
A_12_P135675	NM_060790	F33E2.5	-1.38252	7.30081e-05	0.0103567
A_12_P113484	NM_059661	F13G3.3	-1.38216	0.000634698	0.0445111
A_12_P140650	NM_062621	EEED8.4	-1.38176	5.00531e-05	0.00813234
A_12_P173537	NM_078206	csb-1	-1.38146	6.92829e-07	0.000527862
A_12_P169750	NM_066758	rmd-1	-1.38093	0.000164676	0.0177026
A_12_P150073	NM_001026317	F53F10.8	-1.38061	4.4824e-05	0.00753491
A_12_P118158	NM_071020	hacd-1	-1.38004	0.000255911	0.023965
A_12_P132621	NM_001029504	F46H5.2	-1.37856	6.70496e-05	0.00978165
A_12_P104466	NM_071645	R08E5.2	-1.37818	0.000205126	0.0205359
A_12_P131012	NM_001027527	R01H2.7	-1.37813	1.35259e-05	0.00360546
A_12_P167262	NM_068882	sec-10	-1.37813	1.78323e-05	0.00426087
A_12_P152214	NM_058749	W05F2.3	-1.37717	2.60406e-05	0.00529687
A_12_P179707	NM_065420	rnr-2	-1.37709	2.04761e-05	0.00457015
A_12_P151310	NM_001025812	tol-1	-1.37603	5.70417e-05	0.00882934
A_12_P163103	NM_068825	F49E8.1	-1.37578	1.98416e-05	0.00450854
A_12_P100784	NM_077708	tag-147	-1.37561	0.000435101	0.0345662
A_12_P109471	NM_001026854	C41H7.9	-1.37471	2.61973e-05	0.00531497
A_12_P119342	NM_072316	spn-4	-1.37444	1.23283e-06	0.000773971
A_12_P119646	NM_001025987	ugt-60	-1.37439	2.63682e-05	0.00533311
A_12_P104818	NM_073978	H37A05.2	-1.37409	0.000506898	0.0382636
A_12_P111030	NM_171633	T01B6.3	-1.37359	0.000651677	0.0452317
A_12_P162780	EB995025	F15E6.4	-1.37347	0.000538449	0.0398404
A_12_P141902	NM_062344	C16A11.3	-1.37299	0.000260855	0.0242658
A_12_P152520	NM_001038352	Y54G2A.41	-1.3727	9.51455e-06	0.00286514
A_12_P100268	NM_001029762	set-20	-1.37235	1.73904e-05	0.00418366
A_12_P151696	NM_067767	C23H5.1	-1.36819	1.94357e-05	0.00446753
A_12_P138246	NM_062022	C41H7.3	-1.36793	5.60684e-06	0.00202577
A_12_P106797	NM_065357	F34D10.4	-1.36735	0.000194698	0.0197956
A_12_P173541	NM_078206	csb-1	-1.36693	5.28312e-06	0.00195291
A_12_P114101	NM_073049	K06A4.5	-1.36684	4.83451e-05	0.00796365
A_12_P152521	NM_001038352	Y54G2A.41	-1.36679	9.64316e-06	0.00289056
A_12_P171987	NM_001028207	T12G3.2	-1.36636	3.58765e-06	0.00154863
A_12_P102007	NM_181938	asd-1	-1.36567	0.000149202	0.0165704
A_12_P141032	NM_074073	T26F2.2	-1.36538	7.99643e-05	0.0110053
A_12_P150240	NM_058896	cyb-2.2	-1.3652	4.403e-05	0.00743358
A_12_P116875	NM_068003	Y37E11AM.2	-1.36459	7.26082e-06	0.00240216
A_12_P131036	NM_001028941	cyb-3	-1.36328	2.88763e-05	0.00563062
A_12_P110776	NM_058749	W05F2.3	-1.3628	2.03119e-05	0.00455803
A_12_P159223	NM_171658	erp-1	-1.3627	4.05891e-06	0.00167467
A_12_P111425	NM_069149	D1046.2	-1.36184	3.00354e-05	0.00577513
A_12_P108603	NM_076494	hst-6	-1.35991	4.84561e-05	0.00797173
A_12_P118556	NM_065026	Y22D7AL.9	-1.35925	0.000705671	0.0478494
A_12_P153755	NM_068220	K08F11.2	-1.35908	6.15499e-07	0.00048888
A_12_P106515	NM_071659	ugt-32	-1.35833	1.47132e-05	0.00379717
A_12_P104966	NM_076722	F38B6.6	-1.35787	4.91186e-06	0.00186212
A_12_P147503	NM_001129053	prs-2	-1.35659	3.72487e-06	0.00158691
A_12_P157452	NM_001025988	cpg-1	-1.3561	0.000465804	0.0361277
A_12_P100327	NM_061196	F11C3.1	-1.35582	8.07861e-05	0.011064
A_12_P143876	NM_001026039	pal-1	-1.35573	1.52529e-06	0.000898677
A_12_P109682	NM_075812	C05D9.7	-1.35513	7.11993e-05	0.0101957
A_12_P131066	NM_001028139	zen-4	-1.35457	3.12835e-05	0.00593494
A_12_P138248	NM_062022	C41H7.3	-1.35368	2.84497e-05	0.00557591
A_12_P131770	NM_069646	cyb-2.1	-1.35304	0.000192085	0.0196172
A_12_P159266	NM_077687	T18D3.1	-1.3524	3.04191e-06	0.00139599
A_12_P179550	NM_059317	B0207.2	-1.35061	4.01435e-05	0.00699714
A_12_P171218	NM_075751	T04G9.7	-1.3502	0.000544529	0.0400739
A_12_P113964	NM_066758	rmd-1	-1.34894	0.000150843	0.0166873
A_12_P106416	NM_069536	F01D4.5	-1.34852	2.48693e-06	0.00121938
A_12_P107084	NM_077155	lgc-4	-1.3467	7.91451e-06	0.00253223
A_12_P105847	NM_063438	atg-10	-1.34646	0.000283141	0.0256436
A_12_P143001	NM_062213	F19B10.1	-1.34574	1.82794e-05	0.00430774
A_12_P177535	NM_001136308	F59C6.16	-1.34546	4.22419e-05	0.00725167
A_12_P167261	NM_068882	sec-10	-1.34414	1.45975e-05	0.00377816
A_12_P109702	NM_061339	nfyb-1	-1.34411	5.24772e-05	0.00836342
A_12_P148903	NM_001026915	bath-29	-1.34349	9.54189e-05	0.0122475
A_12_P132726	NM_073853	try-10	-1.34326	1.88888e-05	0.00439006
A_12_P103125	NM_076915	ZK154.5	-1.34317	5.52407e-06	0.00200881
A_12_P106919	NM_068009	ugt-45	-1.3422	4.67859e-06	0.00179977
A_12_P115779	NM_061439	T07D3.4	-1.34033	8.12844e-05	0.0110974
A_12_P108347	NM_072940	srsx-34	-1.34017	8.00649e-07	0.000587205
A_12_P179464	NM_076045	fox-1	-1.33963	0.000184024	0.0190367
A_12_P100226	NM_073897	nasp-2	-1.33745	2.94442e-05	0.00570991
A_12_P148765	NM_063204	F18A1.7	-1.33698	2.79081e-06	0.00132614
A_12_P136740	NM_075108	C06H5.6	-1.33678	0.000291212	0.0261108
A_12_P156970	NM_075979	acl-4	-1.33456	7.29017e-05	0.0103479
A_12_P102033	NM_076648	W05H9.2	-1.33198	2.36281e-06	0.00118654
A_12_P111795	NM_075963	F52D2.5	-1.33129	0.000561878	0.0409638
A_12_P117647	NM_076465	uvt-3	-1.33029	2.29038e-06	0.0011626
A_12_P152830	NM_001268938	Y73F8A.32	-1.33025	0.000443751	0.0350054
A_12_P112201	NM_078326	T20F7.1	-1.3297	8.10116e-06	0.00258601
A_12_P103918	NM_067347	F53A2.3	-1.32944	3.33504e-05	0.00617257
A_12_P159265	NM_077687	T18D3.1	-1.32863	1.74238e-06	0.000975276
A_12_P147504	NM_001129053	prs-2	-1.32752	0.000369019	0.0307777
A_12_P173293	NM_069213	Y11D7A.8	-1.32729	0.000475114	0.0366181
A_12_P102103	NM_065516	cdh-4	-1.3257	1.72805e-06	0.000972806
A_12_P156971	NM_075979	acl-4	-1.32479	0.000133102	0.015347
A_12_P141897	NM_077139	C25A11.1	-1.32273	3.89268e-05	0.00687226
A_12_P172786	NM_077916	ekl-5	-1.32086	2.0071e-05	0.00452919
A_12_P133401	NM_069332	gln-6	-1.31983	3.12571e-05	0.00593494
A_12_P138247	NM_062022	C41H7.3	-1.31954	1.6376e-05	0.00403991
A_12_P112144	NM_077387	F13E6.3	-1.31932	0.000104675	0.0130468
A_12_P115807	NM_066703	ZK1098.3	-1.31842	5.54735e-05	0.00866153
A_12_P159155	NM_001129029	lin-61	-1.31835	0.000684614	0.0468152
A_12_P102520	NM_070976	Y50D4B.4	-1.31744	0.000126094	0.0148088
A_12_P150072	NM_001026317	F53F10.8	-1.31731	1.4011e-05	0.00367977
A_12_P100558	NM_070894	H25P19.1	-1.31698	2.16649e-05	0.00471932
A_12_P173540	NM_078206	csb-1	-1.31645	3.23988e-06	0.00146289
A_12_P102305	NM_063187	F35D2.3	-1.31537	0.000174951	0.0184335
A_12_P113467	NM_001029669	R07E4.1	-1.31382	0.000166968	0.017861
A_12_P108526	NM_071515	F35F10.11	-1.31343	0.00019096	0.0195431
A_12_P112503	NM_001129070	mbtr-1	-1.31205	5.46292e-06	0.00199768
A_12_P108949	NM_066081	R05H11.1	-1.31135	0.000391975	0.032082
A_12_P104237	NM_068173	M01H9.2	-1.30807	0.000129059	0.015031
A_12_P109139	NM_063833	C07E3.6	-1.30797	0.000101927	0.0128102
A_12_P117312	NM_072297	W02F12.3	-1.30688	1.72287e-05	0.00416289
A_12_P117485	NM_070481	Y105C5A.14	-1.30631	0.000355545	0.0300945
A_12_P116308	NM_068690	C06G3.3	-1.30603	0.00067913	0.04657
A_12_P134149	NM_001026612	Y52B11A.2	-1.30574	0.000126254	0.0148098
A_12_P105395	NM_070500	Y105C5B.12	-1.30482	0.000318577	0.0279521
A_12_P159267	NM_077687	T18D3.1	-1.30353	5.24403e-06	0.00194116
A_12_P101359	NM_077536	F52D10.2	-1.30341	1.71526e-05	0.00415703
A_12_P109025	NM_001128941	C01G8.1	-1.30293	0.000707814	0.0479338
A_12_P113695	NM_001028388	Y67H2A.10	-1.30266	6.34973e-05	0.0094661
A_12_P103965	NM_070487	Y105C5A.24	-1.30144	6.82205e-05	0.00989942
A_12_P163104	NM_068825	F49E8.1	-1.30123	7.1622e-06	0.00238054
A_12_P147502	NM_001129053	prs-2	-1.30095	5.07335e-06	0.0019013
A_12_P147501	NM_001129053	prs-2	-1.30054	4.77644e-05	0.00789784
A_12_P106527	NM_076326	taf-11.1	-1.29921	6.70212e-05	0.00978165
A_12_P133731	NM_069368	K07F5.12	-1.29764	0.000309624	0.0273521
A_12_P147500	NM_001129053	prs-2	-1.2971	0.000329612	0.0286385
A_12_P169369	NM_062459	C33F10.4	-1.29644	7.84954e-06	0.00252995
A_12_P141925	NM_001029244	tsp-21	-1.29571	8.35709e-06	0.00263807
A_12_P108154	NM_060777	W02D9.3	-1.29466	0.000480565	0.0368573
A_12_P114999	NM_001026031	ced-4	-1.2945	2.2613e-05	0.00483791
A_12_P114126	NM_001028330	Y54G2A.36	-1.29248	4.83906e-05	0.00796492
A_12_P130506	NM_001029555	egl-15	-1.29072	4.11893e-05	0.00711689
A_12_P102356	NM_001027473	gly-6	-1.29016	0.000176064	0.0185111
A_12_P156745	NM_075064	fbxa-192	-1.28916	9.44195e-05	0.0121788
A_12_P143090	NM_001129487	F57B1.9	-1.28903	0.000399642	0.0325466
A_12_P113544	NM_074067	R10D12.13	-1.28898	2.21365e-05	0.00478031
A_12_P115509	NM_001029288	C44C1.5	-1.28694	1.88535e-06	0.00102177
A_12_P109781	NM_062352	C01F1.6	-1.28653	8.02949e-05	0.0110336
A_12_P131065	NM_001028138	zen-4	-1.28626	0.000172372	0.0182353
A_12_P135342	NM_001128944	C01H6.8	-1.28604	7.5324e-05	0.0105442
A_12_P152213	NM_058749	W05F2.3	-1.286	4.14511e-05	0.00715547
A_12_P138230	NM_001026032	ced-4	-1.28599	5.5458e-05	0.00866153
A_12_P138245	NM_062022	C41H7.3	-1.28538	4.34247e-05	0.00736021
A_12_P104963	NM_067145	sdz-33	-1.28499	3.12903e-05	0.00593494
A_12_P105385	NM_058693	Y54E10BR.2	-1.28356	9.39254e-06	0.00283929
A_12_P107933	NM_182332	R08E5.2	-1.28341	0.000597269	0.0426951
A_12_P103798	NM_001025805	nhr-23	-1.28337	6.05892e-05	0.00918613
A_12_P106136	NM_063278	C08B11.3	-1.28328	1.27367e-05	0.00346572
A_12_P175116	NM_067341	klp-19	-1.28214	5.93734e-05	0.00908606
A_12_P144635	NM_181935	Y40D12A.1	-1.28129	0.000714637	0.0482128
A_12_P163232	NM_075781	sms-2	-1.28039	7.33329e-06	0.00241323
A_12_P114484	NM_076828	sur-5	-1.28004	9.16343e-06	0.0027939
A_12_P138249	NM_062022	C41H7.3	-1.27904	1.52026e-05	0.00388861
A_12_P104083	NM_001027003	F45E10.2	-1.27863	4.71769e-05	0.00783039
A_12_P133080	NM_001026034	C36A4.9	-1.27781	8.79431e-06	0.00272877
A_12_P100451	NM_063695	Y53C12A.6	-1.27662	0.000361677	0.0304339
A_12_P108918	NM_077260	F21G4.4	-1.27592	5.05583e-05	0.00818392
A_12_P177376	NM_060238	sys-1	-1.27585	7.17534e-06	0.00238054
A_12_P179704	NM_065420	rnr-2	-1.27484	7.23445e-05	0.0102909
A_12_P153981	NM_064934	F58B6.1	-1.2736	0.000121082	0.0144187
A_12_P115946	NM_001029734	spat-3	-1.27318	8.2919e-05	0.0112409
A_12_P107104	NM_058646	W03D8.8	-1.27256	5.97945e-05	0.00910787
A_12_P117584	NM_062320	R11F4.1	-1.27186	3.83105e-06	0.00161116
A_12_P173713	NM_060133	C36F7.2	-1.27089	2.57989e-05	0.00526682
A_12_P106118	NM_065420	rnr-2	-1.27039	4.7507e-05	0.00786206
A_12_P130507	NM_001029555	egl-15	-1.27008	0.00058414	0.0420547
A_12_P174029	NM_073268	AC3.5	-1.26836	7.22285e-05	0.0102795
A_12_P114559	NM_069586	cyb-1	-1.26824	1.99075e-05	0.00451255
A_12_P159291	NM_076560	cyp-43A1	-1.26764	0.000493775	0.0375475
A_12_P154797	NM_182310	srg-48	-1.26692	0.000543212	0.0400304
A_12_P102571	NM_064826	tag-266	-1.2663	1.88848e-05	0.00439006
A_12_P108913	NM_001047750	C05D9.9	-1.26539	5.26769e-05	0.00837013
A_12_P167265	NM_001047698	vps-39	-1.26483	2.73684e-05	0.00545806
A_12_P106973	NM_061352	T27A1.2	-1.26451	0.000158836	0.0172976
A_12_P173765	NM_076648	W05H9.2	-1.26396	3.7242e-06	0.00158691
A_12_P141055	NM_062320	R11F4.1	-1.26394	2.16737e-05	0.00471932
A_12_P169016	NM_059918	rskn-1	-1.26353	2.18245e-05	0.0047469
A_12_P109097	NM_061174	sur-2	-1.26325	6.80746e-06	0.00229869
A_12_P174684	NM_171344	drp-1	-1.2632	1.31912e-05	0.00354427
A_12_P141580	NM_001026748	C05C10.5	-1.26039	8.52468e-05	0.0114406
A_12_P106176	NM_058520	Y20F4.5	-1.25984	8.69009e-05	0.0115234
A_12_P120178	NM_001270141	C25A11.10	-1.25943	1.3206e-05	0.00354427
A_12_P138542	NM_001047467	D2096.7	-1.25908	0.000102461	0.0128526
A_12_P104909	NM_067146	fbxb-24	-1.25898	0.000146386	0.0163641
A_12_P112217	NM_074306	rap-2	-1.25857	0.00019081	0.0195328
A_12_P177999	NM_075507	mdt-17	-1.25801	1.21188e-05	0.00337093
A_12_P130163	NM_078171	rab-14	-1.25783	1.90953e-05	0.00442237
A_12_P116309	NM_069547	zim-1	-1.2566	0.000116515	0.0140281
A_12_P106565	NM_170809	hex-4	-1.25642	2.10974e-06	0.0011067
A_12_P171928	NM_058343	acs-13	-1.25627	4.86473e-06	0.00184972
A_12_P117086	NM_075808	rme-6	-1.25589	2.03288e-05	0.00455803
A_12_P154865	NM_060967	Y48G10A.4	-1.25542	5.99853e-05	0.00912277
A_12_P100442	NM_001128944	C01H6.8	-1.25482	2.74061e-05	0.00546138
A_12_P106410	NM_069751	cyp-31A2	-1.2546	2.79955e-06	0.00132614
A_12_P142620	NM_070459	Y73F8A.25	-1.2543	0.000128181	0.0149716
A_12_P117646	NM_062649	F12A10.8	-1.25423	3.37703e-05	0.00621511
A_12_P109345	NM_064178	set-24	-1.25418	3.46734e-05	0.00633085
A_12_P146066	NM_059816	04/01/11	-1.25408	2.32181e-06	0.00117399
A_12_P139165	NM_067525	daf-18	-1.25336	3.15493e-06	0.00143277
A_12_P105166	NM_076549	srv-7	-1.25308	0.000366626	0.0306916
A_12_P150546	NM_001029420	cdk-4	-1.25287	0.000139714	0.0158394
A_12_P115011	NM_076035	C43H6.4	-1.25284	9.36388e-06	0.00283319
A_12_P134146	NM_001026612	Y52B11A.2	-1.25243	0.000358518	0.0302478
A_12_P107913	NM_076098	F53B3.5	-1.25226	1.7483e-05	0.00419822
A_12_P159820	NM_069112	spectrin	-1.25043	0.000178366	0.0186531
A_12_P152575	NM_072318	spe-39	-1.25028	3.86274e-05	0.00683338
A_12_P113308	NM_065603	F26A1.13	-1.2502	7.64293e-05	0.010676
A_12_P135341	NM_001128944	C01H6.8	-1.24893	3.3383e-05	0.00617424
A_12_P101069	NM_077279	F19C6.4	-1.24816	2.51141e-05	0.00518936
A_12_P108273	NM_073530	duo-1	-1.2481	1.9849e-05	0.00450854
A_12_P133400	NM_069332	gln-6	-1.2473	9.90464e-05	0.0126029
A_12_P155625	NM_074706	T13F3.6	-1.24705	0.0004386	0.0347387
A_12_P118566	NM_064461	gst-12	-1.24675	0.000216685	0.0213144
A_12_P157163	NM_001025988	cpg-1	-1.24673	0.000378053	0.0312753
A_12_P136741	NM_075108	C06H5.6	-1.24665	0.000237865	0.0228419
A_12_P105590	NM_072514	F25E5.3	-1.24591	0.000161473	0.0174829
A_12_P159620	NM_069149	D1046.2	-1.24579	0.000103975	0.0129961
A_12_P150117	NM_066696	clu-1	-1.24481	0.000664624	0.0458639
A_12_P130164	NM_078171	rab-14	-1.2442	0.000250443	0.0236164
A_12_P134900	NM_001128944	C01H6.8	-1.24403	5.09518e-05	0.00822726
A_12_P133826	NM_066363	grp-1	-1.24101	3.7347e-06	0.00158937
A_12_P131011	NM_001027527	R01H2.7	-1.24016	3.98691e-05	0.00697131
A_12_P115323	NM_059493	mei-2	-1.23996	5.26899e-05	0.00837013
A_12_P159395	NM_060777	W02D9.3	-1.23975	0.000157551	0.0172102
A_12_P163070	NM_071045	cdc-25.2	-1.23933	2.47044e-05	0.00512878
A_12_P103298	NM_077000	R09F10.3	-1.23866	3.82475e-06	0.00161023
A_12_P107317	NM_061251	egl-26	-1.23858	0.000448004	0.0352141
A_12_P107854	NM_064722	gst-32	-1.23833	7.30681e-05	0.0103614
A_12_P154345	NM_001129677	F54F7.9	-1.23743	0.000265331	0.0245356
A_12_P134922	NM_071542	C04E12.11	-1.2373	4.34898e-05	0.00736802
A_12_P134586	NM_171581	Y39B6A.27	-1.23712	0.000322432	0.0282083
A_12_P107616	NM_063204	F18A1.7	-1.23702	1.64706e-05	0.00405181
A_12_P112669	NM_059918	rskn-1	-1.23702	3.10133e-06	0.00141527
A_12_P108130	NM_170795	spp-17	-1.23529	0.000122131	0.0145172
A_12_P105751	NM_070664	gln-5	-1.23373	5.16209e-05	0.00829772
A_12_P116494	NM_068952	Y42H9AR.4	-1.23361	3.07601e-05	0.00586563
A_12_P159496	NM_075411	mrp-7	-1.2307	0.000262445	0.0243732
A_12_P104608	NM_063846	ZK673.4	-1.23062	8.68418e-05	0.0115234
A_12_P163013	NM_075247	Y69H2.7	-1.23052	4.89314e-05	0.00801415
A_12_P103081	NM_077881	Y12A6A.1	-1.23048	0.000192657	0.0196502
A_12_P137385	NM_001038420	Y32G9A.13	-1.23038	0.000287893	0.0259116
A_12_P130402	NM_001129002	tlf-1	-1.22921	2.67786e-05	0.00537568
A_12_P105363	NM_063125	brf-1	-1.22918	8.21418e-05	0.0111717
A_12_P177378	NM_060238	sys-1	-1.22907	4.63901e-06	0.00179175
A_12_P102289	NM_061419	F46F5.7	-1.22888	1.41885e-06	0.000853867
A_12_P171927	NM_058343	acs-13	-1.2285	2.06084e-05	0.00458343
A_12_P131386	NM_074705	fbxa-2	-1.22782	0.000238437	0.0228801
A_12_P130510	NM_077441	egl-15	-1.22566	0.000676905	0.04645
A_12_P134585	NM_171581	Y39B6A.27	-1.22553	0.000358541	0.0302478
A_12_P135835	NM_072162	F29G9.1	-1.22498	1.80726e-05	0.00428475
A_12_P103771	NM_182235	F55C12.5	-1.22496	2.28271e-05	0.00485808
A_12_P118378	NM_062702	zyg-1	-1.2248	4.43406e-06	0.00175032
A_12_P111690	NM_062021	C41H7.4	-1.22302	3.03606e-05	0.00581962
A_12_P119554	NM_061572	Y51H7C.3	-1.22267	0.000267638	0.0246919
A_12_P114018	NM_072668	oma-2	-1.2225	9.13183e-05	0.0119119
A_12_P156980	NM_078104	H40L08.3	-1.22217	3.50974e-05	0.00638154
A_12_P137386	NM_001038420	Y32G9A.13	-1.22137	6.20114e-05	0.00932607
A_12_P140858	NM_001026479	hmr-1	-1.22025	0.000113586	0.013794
A_12_P104840	NM_069818	magi-1	-1.21806	1.95769e-05	0.00447901
A_12_P172106	NM_068896	C33H5.18	-1.21736	9.30748e-05	0.0120557
A_12_P179549	NM_059317	B0207.2	-1.21731	0.000189333	0.019417
A_12_P134145	NM_001026612	Y52B11A.2	-1.21716	0.000595802	0.0426213
A_12_P100630	NM_060822	T06G6.4	-1.21707	3.98799e-06	0.00165411
A_12_P101872	NM_001047491	JC8.11	-1.21701	0.000368459	0.030767
A_12_P105605	NM_062851	F13H8.11	-1.21679	4.10362e-05	0.00710574
A_12_P161543	NM_001027728	pph-4.2	-1.21534	2.11681e-05	0.00464793
A_12_P115726	NM_058896	cyb-2.2	-1.21516	0.000106138	0.0131749
A_12_P169778	NM_001026872	C56E6.3	-1.21502	1.55183e-05	0.00393128
A_12_P143060	NM_074017	swan-1	-1.21489	1.82543e-05	0.00430699
A_12_P117493	NM_171476	gon-14	-1.21454	3.22451e-05	0.00604788
A_12_P153301	NM_066102	T07E3.3	-1.21424	1.05651e-05	0.00307794
A_12_P171931	NM_058343	acs-13	-1.21318	1.5885e-05	0.00398521
A_12_P107100	NM_059581	pcbd-1	-1.21268	8.47699e-06	0.00265729
A_12_P141317	NM_001028943	T07C12.14	-1.2125	1.25814e-05	0.00344496
A_12_P103176	NM_062450	C27D9.1	-1.21181	0.000530411	0.0394541
A_12_P174452	NM_059856	mei-1	-1.21138	0.000432416	0.0344157
A_12_P103570	NM_077915	Y26E6A.2	-1.21124	0.0001734	0.0183144
A_12_P173847	NM_060101	C17E4.3	-1.2108	0.000734988	0.0492219
A_12_P150076	NM_068450	H35B03.1	-1.21039	1.62148e-05	0.00402851
A_12_P104819	NM_066836	T16H12.1	-1.21029	4.09271e-05	0.00709624
A_12_P162978	NM_077693	atf-6	-1.20979	6.0485e-05	0.0091761
A_12_P105582	NM_073408	pak-2	-1.20956	2.02029e-05	0.00454602
A_12_P109391	NM_066593	F59B2.8	-1.20927	0.000369737	0.0308082
A_12_P100764	NM_061325	C24H12.5	-1.20857	2.56221e-05	0.00524737
A_12_P174569	NM_001027021	bcs-1	-1.20776	8.74351e-06	0.00272497
A_12_P110737	NM_068256	Y17G9A.3	-1.20661	7.13154e-05	0.0102014
A_12_P167267	NM_001047698	vps-39	-1.20588	0.000251019	0.0236536
A_12_P117449	NM_067569	K11H12.5	-1.20581	0.00040787	0.0330111
A_12_P110409	NM_059646	cpg-3	-1.20567	7.90961e-06	0.00253223
A_12_P118964	NM_001028207	T12G3.2	-1.20541	1.42567e-06	0.000854043
A_12_P148502	NM_001028846	H37A05.4	-1.20538	1.1394e-05	0.0032373
A_12_P155775	NM_064568	jmjd-2	-1.20503	1.30942e-05	0.00352872
A_12_P158480	NM_067218	pie-1	-1.20458	1.7974e-05	0.00427427
A_12_P110253	NM_058280	mex-3	-1.20434	3.2147e-05	0.00603779
A_12_P108150	NM_066783	K11H3.4	-1.20383	0.00028469	0.0257105
A_12_P141056	NM_062320	R11F4.1	-1.20349	2.10353e-05	0.00463954
A_12_P169777	NM_001026872	C56E6.3	-1.2032	8.06897e-05	0.011064
A_12_P172183	NM_001028135	M01H9.3	-1.20314	7.42705e-06	0.00243661
A_12_P113707	NM_001026479	hmr-1	-1.2027	0.000238066	0.0228501
A_12_P139455	NM_078122	T10B10.3	-1.20199	0.000475913	0.0366438
A_12_P114191	NM_074837	gyg-2	-1.20177	1.63913e-05	0.00403991
A_12_P149956	NM_001129306	lin-3	-1.20125	0.00014829	0.0164924
A_12_P130513	NM_001029553	egl-15	-1.19895	0.000304548	0.0270172
A_12_P167644	NM_062526	F33G12.3	-1.19895	5.8799e-05	0.00902244
A_12_P163071	NM_071045	cdc-25.2	-1.19869	0.000100991	0.0127217
A_12_P117711	NM_076555	set-19	-1.19841	1.18822e-05	0.00333388
A_12_P110644	NM_064517	sre-44	-1.19787	0.000562997	0.0410072
A_12_P141880	NM_001026770	C08H9.3	-1.19765	0.000528819	0.0393804
A_12_P114025	NM_078008	gfi-3	-1.19733	3.03468e-06	0.00139593
A_12_P103229	NM_067319	Y39E4B.5	-1.19713	5.98848e-05	0.00911808
A_12_P113037	NM_074284	T01C3.1	-1.19708	0.000146791	0.0163814
A_12_P135806	NM_062860	F13H8.7	-1.19627	3.97318e-05	0.00695971
A_12_P113766	NM_059317	B0207.2	-1.19592	0.000132159	0.0152895
A_12_P109186	NM_182155	C44B7.12	-1.19474	1.56998e-05	0.0039614
A_12_P173763	NM_076648	W05H9.2	-1.19455	1.46559e-05	0.00379077
A_12_P118573	NM_001028344	Y55F3BR.8	-1.19424	1.68425e-05	0.00411382
A_12_P151180	NM_001026904	F10C1.9	-1.19315	0.000128197	0.0149716
A_12_P159490	NM_059053	F54D7.2	-1.19308	8.29367e-05	0.0112409
A_12_P117430	NM_075961	F52D2.7	-1.19111	0.000103102	0.0129165
A_12_P155777	NM_064568	jmjd-2	-1.18997	1.00106e-05	0.00296447
A_12_P105591	NM_066072	bath-41	-1.18973	1.84697e-05	0.00433436
A_12_P167719	NM_077049	utx-1	-1.18935	8.22847e-05	0.0111871
A_12_P176767	NM_066232	hmg-4	-1.18924	0.000696478	0.0474034
A_12_P179670	NM_069100	F21D5.2	-1.1891	0.000124351	0.014653
A_12_P152576	NM_072318	spe-39	-1.18834	2.69481e-05	0.00540028
A_12_P171930	NM_058343	acs-13	-1.18811	1.45582e-05	0.00377417
A_12_P116213	NM_066809	K03H1.7	-1.18791	1.49493e-06	0.000886062
A_12_P108586	NM_001028250	pig-1	-1.18779	2.0563e-05	0.00458173
A_12_P114604	NM_076774	C16E9.2	-1.18763	1.86434e-05	0.00436728
A_12_P142676	NM_065245	Y55D5A.2	-1.18718	0.000694546	0.0473211
A_12_P161368	NM_001129417	C53A5.2	-1.18667	0.000108005	0.0133356
A_12_P107407	NM_001026747	C05C10.5	-1.18661	0.000370291	0.0308281
A_12_P150545	NM_001029420	cdk-4	-1.18658	8.62242e-05	0.0115076
A_12_P118225	NM_061845	F43C11.9	-1.18639	2.79549e-06	0.00132614
A_12_P139802	NM_171245	eri-1	-1.18615	1.41098e-05	0.00370076
A_12_P110208	NM_078439	F31A3.5	-1.18604	9.6392e-06	0.00289056
A_12_P105339	NM_171917	F13H10.3	-1.18597	3.65785e-06	0.00156687
A_12_P112392	NM_061444	fbxa-200	-1.1856	3.19742e-05	0.00601432
A_12_P120154	NM_059279	cpb-3	-1.18459	0.000373016	0.0309951
A_12_P134215	NM_001047722	fog-2	-1.18458	8.27625e-05	0.0112328
A_12_P167266	NM_001047698	vps-39	-1.18444	0.000462908	0.0359528
A_12_P179059	NM_068674	ZK381.2	-1.18375	0.000152844	0.0168414
A_12_P100922	NM_170813	Y51F10.2	-1.18118	2.30663e-05	0.00488959
A_12_P149010	NM_001026079	F11F1.8	-1.18061	0.000477333	0.0367037
A_12_P113639	NM_060082	F26H9.5	-1.18059	0.000136481	0.0156173
A_12_P155776	NM_064568	jmjd-2	-1.18032	2.49451e-05	0.00516508
A_12_P153000	NM_001027853	tpk-1	-1.17937	0.000163532	0.017628
A_12_P107205	NM_171658	erp-1	-1.17913	2.20546e-05	0.00476725
A_12_P158490	NM_059136	hcp-6	-1.17908	3.58652e-06	0.00154863
A_12_P107240	NM_068135	F15E6.9	-1.17865	2.9092e-05	0.00566219
A_12_P118198	NM_069926	Y39C12A.9	-1.17848	6.68637e-05	0.00976877
A_12_P113402	NM_078177	F59D12.5	-1.17735	3.16249e-06	0.00143454
A_12_P118769	NM_001047242	cdt-1	-1.17639	8.44715e-05	0.0113664
A_12_P169779	NM_001026872	C56E6.3	-1.17637	6.55641e-05	0.009664
A_12_P100628	NM_062990	F31E8.4	-1.17609	6.19705e-06	0.00215564
A_12_P113268	NM_075726	F13C5.1	-1.1749	0.000488065	0.0372215
A_12_P157745	NM_001128947	C12C8.2	-1.17474	0.000383998	0.0316299
A_12_P138540	NM_001047467	D2096.7	-1.1745	0.000146069	0.0163427
A_12_P101094	NM_063078	gld-3	-1.17419	2.04455e-05	0.0045685
A_12_P143190	NM_001026264	F31C3.6	-1.17355	0.000295586	0.0263832
A_12_P172104	NM_068896	C33H5.18	-1.17329	1.11891e-05	0.00320463
A_12_P120092	NM_001265240	Y48G10A.4	-1.17294	2.76055e-05	0.00549275
A_12_P114289	NM_065539	mab-21	-1.17287	0.000165915	0.0177871
A_12_P113752	NM_066579	ZK643.2	-1.1728	3.70487e-05	0.00664396
A_12_P149166	NM_065539	mab-21	-1.17217	0.00033724	0.0290568
A_12_P116806	NM_078081	rgs-10	-1.17031	0.000212027	0.0209822
A_12_P105622	NM_063343	tdc-1	-1.17015	5.78594e-05	0.00892047
A_12_P156746	NM_075064	fbxa-192	-1.17005	2.65459e-05	0.00535525
A_12_P172784	NM_077916	ekl-5	-1.16898	6.39321e-05	0.00950564
A_12_P110945	NM_063957	nos-1	-1.16887	9.84669e-05	0.0125482
A_12_P158575	NM_077121	C24A3.8	-1.16875	8.66588e-05	0.0115197
A_12_P108853	NM_062024	C41H7.1	-1.16858	0.000532584	0.0395769
A_12_P113712	NM_069027	M116.2	-1.16822	4.89785e-05	0.00801415
A_12_P138325	NM_062232	C46E10.9	-1.16817	1.18925e-05	0.00333388
A_12_P109383	NM_061838	ZK1240.3	-1.16813	6.09167e-05	0.00922153
A_12_P143002	NM_062213	F19B10.1	-1.16765	0.000235087	0.0226913
A_12_P105133	NM_077532	C35C5.6	-1.16759	0.000298747	0.0265867
A_12_P107571	NM_076622	flu-2	-1.16728	4.1406e-05	0.00715084
A_12_P113597	NM_072771	pos-1	-1.16723	0.000277604	0.0252761
A_12_P169308	NM_065489	R07E5.3	-1.16684	6.6872e-05	0.00976877
A_12_P131013	NM_001027527	R01H2.7	-1.16621	5.03535e-05	0.008171
A_12_P131718	NM_058408	spd-1	-1.16553	0.000173716	0.0183329
A_12_P177377	NM_060238	sys-1	-1.16516	4.32932e-05	0.00735443
A_12_P113061	NM_001028895	R02F11.3	-1.16453	0.000581022	0.0418771
A_12_P113559	NM_078140	C33A11.2	-1.1644	7.49676e-05	0.010513
A_12_P105766	NM_059917	T01H8.2	-1.16434	7.78487e-06	0.00251614
A_12_P112712	NM_001047325	K05F6.11	-1.1634	0.000434923	0.0345652
A_12_P100656	NM_063544	T24H10.4	-1.16312	2.95909e-05	0.00572522
A_12_P130946	NM_001129166	T12C9.7	-1.16273	1.01936e-05	0.00300729
A_12_P112648	NM_069755	F22B3.4	-1.16158	0.000276531	0.0252276
A_12_P176710	NM_001026915	bath-30	-1.16013	0.000272555	0.0250044
A_12_P161623	NM_076680	K10C2.7	-1.15973	0.000111448	0.0136144
A_12_P103033	NM_181933	ztf-1	-1.15953	2.44716e-05	0.00509934
A_12_P142466	NM_062651	cyp-44A1	-1.15949	2.314e-06	0.00117156
A_12_P134550	NM_001047244	Y71A12B.12	-1.15945	0.000312658	0.02756
A_12_P139869	NM_078171	rab-14	-1.15944	1.89064e-06	0.00102182
A_12_P112667	NM_062817	ptc-2	-1.15918	0.000420173	0.0336735
A_12_P112655	NM_060238	sys-1	-1.15911	6.63575e-05	0.00972983
A_12_P133471	NM_073453	ima-1	-1.15909	1.43233e-05	0.00373182
A_12_P133043	NM_062459	C33F10.4	-1.1583	0.000123535	0.0146088
A_12_P110693	NM_171245	eri-1	-1.15792	5.16655e-05	0.0083015
A_12_P104240	NM_065258	Y53G8B.2	-1.15789	0.000179062	0.0187009
A_12_P113660	NM_078233	ZK1073.1	-1.15787	9.16948e-05	0.0119451
A_12_P104370	NM_063774	die-1	-1.15787	0.000133194	0.0153532
A_12_P119743	NM_076093	tra-4	-1.15683	0.000248231	0.0234685
A_12_P145906	NM_001083307	Y49A10A.2	-1.15682	0.000291141	0.0261108
A_12_P167645	NM_062526	F33G12.3	-1.15671	0.00024104	0.0230173
A_12_P102114	NM_063799	R05H5.3	-1.1566	5.82864e-06	0.00208229
A_12_P146065	NM_059816	apr-1	-1.15648	3.62601e-06	0.00156115
A_12_P147565	NM_001028935	T05H4.15	-1.15636	0.000332127	0.0287933
A_12_P104455	NM_061743	math-44	-1.15593	0.000448752	0.0352261
A_12_P119737	NM_069984	T04A11.1	-1.15539	0.000603791	0.0430515
A_12_P114590	NM_078149	R03A10.1	-1.15536	0.000230375	0.0223415
A_12_P147723	NM_001029012	W02F12.4	-1.15534	4.91334e-05	0.00802277
A_12_P149165	NM_065539	mab-21	-1.1549	0.000163953	0.0176589
A_12_P167646	NM_062526	F33G12.3	-1.15475	6.86566e-05	0.00994432
A_12_P154868	NM_060967	Y48G10A.4	-1.15433	2.08289e-05	0.00460956
A_12_P105220	NM_061763	math-1	-1.15387	0.000552107	0.0404118
A_12_P148501	NM_001028846	H37A05.4	-1.15385	3.89982e-06	0.0016323
A_12_P159673	NM_073953	C56A3.4	-1.15354	1.22693e-05	0.00339048
A_12_P114523	NM_171476	gon-14	-1.15325	2.03289e-05	0.00455803
A_12_P101397	NM_069141	oma-1	-1.15307	0.000157544	0.0172102
A_12_P103681	NM_066613	glp-1	-1.15285	8.0782e-05	0.011064
A_12_P131370	NM_001129032	rskn-1	-1.15199	3.79819e-06	0.00160421
A_12_P135605	NM_171658	erp-1	-1.15156	1.35447e-06	0.000822237
A_12_P170823	NM_171595	Y39B6A.13	-1.14996	5.26344e-05	0.00837013
A_12_P132620	NM_001029504	F46H5.2	-1.14987	6.31437e-06	0.00217907
A_12_P130165	NM_078171	rab-14	-1.14881	9.90565e-05	0.0126029
A_12_P106987	NM_061066	mys-2	-1.14863	5.59481e-05	0.00871903
A_12_P154827	NM_001038359	Y54G2A.48	-1.14837	0.000200525	0.0202316
A_12_P102515	NM_065246	Y55D5A.3	-1.14772	7.66087e-05	0.0106853
A_12_P109716	NM_070018	vha-7	-1.14762	7.77927e-05	0.0107697
A_12_P159580	NM_059056	F57C9.7	-1.14698	0.000145955	0.0163393
A_12_P113414	NM_066995	C44B9.3	-1.14662	0.0003513	0.0299135
A_12_P103208	NM_078249	sdc-1	-1.14642	3.31327e-06	0.00148511
A_12_P118337	NM_058616	F40E3.3	-1.14609	6.63329e-05	0.00972983
A_12_P177465	NM_001047333	pde-4	-1.14599	0.000409864	0.0331247
A_12_P174568	NM_001027021	bcs-1	-1.14589	3.5785e-05	0.00646759
A_12_P110705	NM_065998	C16A3.2	-1.14529	0.000203452	0.0204429
A_12_P117483	NM_070507	Y105C5B.19	-1.1452	0.000177983	0.0186379
A_12_P109567	NM_067702	Y41D4B.14	-1.14468	0.000319159	0.0279906
A_12_P105375	NM_068365	F36H12.16	-1.1445	9.42496e-05	0.0121609
A_12_P179672	NM_069100	F21D5.2	-1.14432	0.000437078	0.034668
A_12_P168140	NM_066594	F59B2.9	-1.14414	0.000344987	0.029504
A_12_P165874	NM_001028641	F17C11.7	-1.14404	0.000357866	0.0302299
A_12_P151550	NM_001136281	C17E4.10	-1.14392	6.24748e-05	0.00938093
A_12_P179951	NM_063745	ufd-3	-1.14392	0.000507944	0.0383131
A_12_P108938	NM_060232	T24D1.3	-1.14382	1.80101e-05	0.00427508
A_12_P112606	NM_001029734	spat-3	-1.14358	7.76911e-06	0.00251311
A_12_P114164	NM_067546	efn-4	-1.14325	2.68696e-05	0.00539006
A_12_P100680	NM_073786	C15C8.4	-1.14283	4.03935e-05	0.00702855
A_12_P108228	NM_060847	clec-104	-1.14196	0.000418106	0.033529
A_12_P172785	NM_077916	ekl-5	-1.14184	2.88647e-05	0.00563062
A_12_P130296	NM_066191	R151.8	-1.14115	4.43006e-05	0.0074731
A_12_P167259	NM_068882	sec-10	-1.14083	9.24631e-05	0.0120133
A_12_P170312	NM_059445	san-1	-1.14051	0.000225451	0.0219508
A_12_P167709	NM_061395	thoc-1	-1.14001	0.0002516	0.0236742
A_12_P173951	NM_065699	pup-2	-1.13965	0.000430458	0.0343086
A_12_P130112	NM_076183	ZK563.5	-1.13961	2.23531e-05	0.00480329
A_12_P108024	NM_071876	hil-4	-1.13891	4.16006e-05	0.00717495
A_12_P142785	NM_067067	Y47D3B.3	-1.13864	0.000307808	0.0272448
A_12_P148500	NM_001028846	H37A05.4	-1.13841	5.82393e-05	0.00896494
A_12_P114970	NM_171514	smg-4	-1.13791	1.73482e-05	0.00417864
A_12_P119738	NM_171918	lin-3	-1.13763	0.000292092	0.0261666
A_12_P168299	NM_061572	Y51H7C.3	-1.13723	1.22067e-05	0.00339048
A_12_P167264	NM_001047698	vps-39	-1.13648	0.000449392	0.0352449
A_12_P174027	NM_001269286	AC3.5	-1.13624	2.57432e-05	0.00526368
A_12_P174683	NM_171344	drp-1	-1.1359	3.3246e-06	0.00148744
A_12_P120037	NM_001136345	clr-1	-1.13517	5.04202e-05	0.00817505
A_12_P115781	NM_171435	Y50D4C.6	-1.1349	9.1169e-05	0.0119003
A_12_P116939	NM_060153	T05F1.2	-1.13429	0.000188342	0.0193255
A_12_P163283	NM_073786	C15C8.4	-1.13403	6.4126e-06	0.00220135
A_12_P119112	NM_078377	mdt-1.2	-1.13374	6.83244e-05	0.00990716
A_12_P171854	NM_066349	ARPA	-1.13364	1.8876e-05	0.00439006
A_12_P177468	NM_001047333	pde-4	-1.13361	0.000252368	0.0237238
A_12_P144172	NM_001047575	Y55F3BR.10	-1.13307	0.000448949	0.0352261
A_12_P110807	NM_059069	glc-2	-1.13247	0.000350099	0.0298371
A_12_P147951	NM_001028044	F52B11.1	-1.13236	3.64399e-05	0.00656265
A_12_P168301	NM_061572	Y51H7C.3	-1.13223	1.53234e-06	0.000901427
A_12_P172328	NM_061225	F31C3.4	-1.13183	0.000456825	0.0356285
A_12_P104491	U62896	pie-1	-1.13172	4.84958e-05	0.00797173
A_12_P119087	NM_065835	wrm-1	-1.13118	0.000310449	0.0273921
A_12_P172247	NM_060022	fcp-1	-1.1305	9.88304e-06	0.00294223
A_12_P155005	NM_067068	Y47D3B.4	-1.13018	8.47443e-05	0.0113875
A_12_P147880	NM_001026382	dut-1	-1.12997	0.000205939	0.0205873
A_12_P116853	NM_062860	F13H8.7	-1.12959	2.77256e-05	0.00549435
A_12_P109950	NM_170936	ech-7	-1.12908	4.87524e-05	0.00799716
A_12_P159921	NM_076243	fkh-2	-1.12889	0.000432609	0.0344241
A_12_P169457	NM_071115	T10B5.8	-1.12846	0.000449529	0.0352455
A_12_P149510	NM_066346	lin-36	-1.12839	0.000341118	0.0293009
A_12_P141330	NM_062970	T14B4.9	-1.12813	3.60066e-05	0.00649866
A_12_P103758	NM_001025988	cpg-1	-1.12794	0.000578143	0.0417309
A_12_P149957	NM_001129306	lin-3	-1.12783	0.000549501	0.0403237
A_12_P159550	NM_064657	Y54E2A.2	-1.12764	9.33842e-05	0.012085
A_12_P177374	NM_060238	sys-1	-1.12735	1.87581e-06	0.00101937
A_12_P111658	NM_001276949	twk-43	-1.12733	0.000342627	0.0293726
A_12_P113087	NM_072430	C13F10.2	-1.12684	1.15618e-05	0.00327314
A_12_P168661	NM_058784	Y47G6A.25	-1.12659	0.000160294	0.017384
A_12_P146730	NM_001028330	Y54G2A.36	-1.12601	3.44364e-05	0.00629342
A_12_P170822	NM_171595	Y39B6A.13	-1.12595	6.48589e-05	0.00959255
A_12_P138370	NM_077106	cyn-8	-1.12566	0.000258574	0.0241107
A_12_P110489	NM_077470	hst-2	-1.12531	0.000356697	0.0301511
A_12_P109622	NM_066550	F44E2.10	-1.12528	0.000625321	0.0440933
A_12_P159606	NM_058335	cutl-13	-1.12436	7.43904e-05	0.0104545
A_12_P100519	NM_068748	D2024.2	-1.12392	1.42277e-05	0.00371924
A_12_P172103	NM_068896	C33H5.18	-1.12384	0.000117079	0.014055
A_12_P118374	NM_058423	Y48G8AL.9	-1.12376	3.87664e-05	0.0068487
A_12_P157325	NM_060561	C17D12.3	-1.12323	0.000136448	0.0156173
A_12_P116626	NM_073679	F55C5.4	-1.12318	2.38804e-05	0.00502856
A_12_P103859	NM_068939	Y42H9B.3	-1.12309	3.98477e-05	0.00697131
A_12_P110781	NM_064657	Y54E2A.2	-1.123	2.84925e-05	0.00557871
A_12_P116506	NM_001029305	C46H3.2	-1.12208	9.53197e-05	0.0122426
A_12_P166284	NM_001026035	C36A4.9	-1.12182	0.000413458	0.0332882
A_12_P135100	NM_065420	rnr-2	-1.12181	0.000285998	0.0258032
A_12_P104881	NM_072161	F29G9.7	-1.12164	0.000108877	0.0133946
A_12_P179673	NM_069100	F21D5.2	-1.12141	0.000257644	0.0240583
A_12_P141451	NM_001026532	exoc-8	-1.121	0.000129137	0.0150312
A_12_P101711	NM_077935	tbc-19	-1.12053	9.20669e-05	0.0119777
A_12_P155779	NM_064568	jmjd-2	-1.12031	1.89084e-05	0.00439006
A_12_P130148	NM_058798	rab-8	-1.11929	0.000541934	0.0399777
A_12_P114222	NM_075674	Y73B3A.16	-1.11926	0.000387809	0.0318398
A_12_P114628	NM_182362	F46B6.5	-1.11889	5.35044e-05	0.0084516
A_12_P169370	NM_062459	C33F10.4	-1.11882	0.000108454	0.0133728
A_12_P114640	NM_069646	cyb-2.1	-1.11859	0.000116602	0.0140342
A_12_P110455	NM_077261	F21G4.5	-1.11851	0.000245138	0.0232839
A_12_P111293	NM_063756	ZK892.6	-1.11834	9.74895e-05	0.012456
A_12_P114620	NM_077433	pxn-2	-1.11803	0.000652637	0.0452755
A_12_P154828	NM_001038359	Y54G2A.48	-1.11793	0.000275455	0.0251645
A_12_P173948	NM_065699	pup-2	-1.1175	0.000225727	0.0219721
A_12_P171929	NM_058343	acs-13	-1.1173	4.27014e-05	0.0072816
A_12_P176764	NM_066232	hmg-4	-1.11515	0.000575324	0.041622
A_12_P158730	NM_062599	F09E5.10	-1.11515	6.58828e-06	0.00224789
A_12_P134786	NM_059154	C01G8.1	-1.11514	0.000128202	0.0149716
A_12_P117488	NM_066378	D2007.3	-1.11442	0.000321126	0.0281192
A_12_P117037	NM_063456	T01B7.6	-1.11435	0.000245938	0.023326
A_12_P113787	NM_062901	del-10	-1.11408	1.90755e-05	0.00442101
A_12_P109443	NM_068794	F55G1.7	-1.11378	6.1814e-05	0.00931424
A_12_P106924	NM_001026412	dhp-1	-1.11354	0.000115017	0.0139118
A_12_P168302	NM_061572	Y51H7C.3	-1.11354	3.06293e-05	0.00585111
A_12_P115554	NM_001026318	mex-3	-1.11348	0.000202981	0.0204135
A_12_P118621	NM_182037	C06A5.8	-1.11249	0.000167409	0.0179025
A_12_P104652	NM_001025827	lin-41	-1.11215	0.000557675	0.0406951
A_12_P116466	NM_068134	F15E6.4	-1.11206	0.000429776	0.0342751
A_12_P153265	NM_075620	num-1	-1.11193	7.11671e-06	0.00237048
A_12_P130196	NM_001026039	pal-1	-1.11162	0.000161732	0.0174965
A_12_P137387	NM_001038420	Y32G9A.13	-1.11149	1.68575e-05	0.00411382
A_12_P109409	NM_182042	met-1	-1.111	0.000159979	0.0173706
A_12_P116752	NM_001026915	bath-29	-1.11084	1.87882e-05	0.00438883
A_12_P179952	NM_063745	ufd-3	-1.11035	0.000162224	0.0175447
A_12_P111050	NM_069744	cbd-1	-1.11031	0.000222997	0.0217609
A_12_P167710	NM_061395	thoc-1	-1.10922	0.000187375	0.0192666
A_12_P117549	NM_076061	F52H2.5	-1.10916	2.30241e-05	0.00488593
A_12_P112479	NM_001028197	T09A12.2	-1.10897	2.58472e-05	0.00527395
A_12_P173553	NM_059783	F20G4.2	-1.10863	0.000136167	0.0155951
A_12_P153001	NM_001027853	tpk-1	-1.10826	0.000194941	0.0198065
A_12_P134915	NM_072440	C05C8.9	-1.10799	8.23351e-05	0.0111871
A_12_P138371	NM_077106	cyn-8	-1.1074	0.000143937	0.0162012
A_12_P105470	NM_171469	dmd-7	-1.10717	0.000224889	0.0219123
A_12_P130147	NM_058798	rab-8	-1.10699	0.000232593	0.0225231
A_12_P112500	NM_062784	vrk-1	-1.10664	0.000151992	0.0167758
A_12_P117875	NM_063493	lat-1	-1.10602	4.91057e-05	0.00802277
A_12_P159815	NM_059696	ZK524.4	-1.10559	3.45283e-05	0.00630729
A_12_P112913	NM_064934	F58B6.1	-1.10558	0.000147328	0.0164273
A_12_P171852	NM_066349	ARPA	-1.10537	6.3108e-05	0.00943674
A_12_P145369	NM_170919	cdc-26	-1.10511	8.4526e-06	0.00265544
A_12_P156071	NM_059380	chn-1	-1.10486	0.000204535	0.020518
A_12_P168659	NM_058784	Y47G6A.25	-1.10446	0.000165633	0.0177666
A_12_P103501	NM_001027989	daf-1	-1.10431	0.000221491	0.0216727
A_12_P179950	NM_063745	ufd-3	-1.10407	0.000469414	0.0363157
A_12_P130197	NM_001026039	pal-1	-1.1032	5.19652e-05	0.00832913
A_12_P108253	NM_063158	Y9D1A.2	-1.10291	0.000651263	0.0452266
A_12_P100671	NM_171291	mdf-2	-1.10269	0.000546533	0.0401876
A_12_P118214	NM_001029537	unc-84	-1.1025	3.16923e-05	0.00597849
A_12_P161188	NM_073618	drs-2	-1.10242	2.79834e-05	0.0055195
A_12_P119155	NM_071842	Y61A9LA.1	-1.1022	7.38234e-05	0.0104145
A_12_P173347	NM_076034	C43H6.7	-1.10164	9.12344e-05	0.0119049
A_12_P108103	NM_067930	F42A6.1	-1.1016	0.000407382	0.0329852
A_12_P150648	NM_001128989	F27D4.2	-1.10088	9.64262e-05	0.0123483
A_12_P159816	NM_059696	ZK524.4	-1.09962	4.11518e-06	0.00168901
A_12_P155778	NM_064568	jmjd-2	-1.09884	1.1093e-05	0.00318424
A_12_P104708	NM_073630	gana-1	-1.09867	0.000365637	0.0306422
A_12_P110417	NM_059592	ctg-1	-1.09854	0.000338801	0.0291657
A_12_P118377	NM_061504	K02E7.12	-1.09844	5.39703e-05	0.00850808
A_12_P117853	NM_074789	Y32B12B.4	-1.09809	6.34652e-05	0.00946578
A_12_P113409	NM_065063	pqn-82	-1.09787	0.000116032	0.0140084
A_12_P175121	NM_061151	npp-4	-1.0978	3.79118e-05	0.00673716
A_12_P135761	NM_001026968	daf-19	-1.09756	0.000213397	0.0210699
A_12_P103414	NM_059077	F28B3.5	-1.09743	1.87053e-06	0.00101796
A_12_P142435	NM_001028398	Y73B6BL.31	-1.09711	0.000489661	0.0373214
A_12_P106441	NM_068419	puf-7	-1.09663	0.000148154	0.0164867
A_12_P117887	NM_060076	prom-1	-1.09661	0.000647222	0.0450832
A_12_P102002	NM_069169	C53D6.6	-1.0964	6.01366e-05	0.00914223
A_12_P167711	NM_061395	thoc-1	-1.09634	0.000242402	0.0230953
A_12_P109392	NM_059783	F20G4.2	-1.09626	5.92707e-05	0.00907742
A_12_P156340	NM_063799	R05H5.3	-1.09607	5.88197e-05	0.00902244
A_12_P101982	NM_001026617	aat-9	-1.09606	0.000328346	0.0285602
A_12_P117142	NM_066118	F31E3.4	-1.09577	2.56233e-05	0.00524737
A_12_P173949	NM_065699	pup-2	-1.0957	0.000240795	0.0230163
A_12_P159180	NM_066974	rnf-113	-1.09457	3.61011e-05	0.00650674
A_12_P107494	NM_001129606	ZK228.4	-1.09291	0.000187593	0.0192789
A_12_P110974	NM_062344	C16A11.3	-1.0926	0.000259531	0.0241713
A_12_P157261	NM_069140	C09G9.5	-1.09211	2.65255e-05	0.00535388
A_12_P142649	NM_064372	puf-6	-1.0921	0.000448972	0.0352261
A_12_P117043	NM_078178	F59D12.3	-1.09204	0.000704249	0.0477996
A_12_P109361	NM_058578	F23C8.3	-1.09169	6.56948e-05	0.00966938
A_12_P101569	NM_058790	T28F2.2	-1.09167	3.48159e-05	0.00634901
A_12_P113127	NM_065578	rbg-3	-1.09164	1.73382e-05	0.00417864
A_12_P113092	NM_075938	T26C11.4	-1.0916	0.000109579	0.0134531
A_12_P162844	NM_001027391	sel-5	-1.0911	3.40915e-05	0.0062537
A_12_P103267	NM_072555	F19F10.11	-1.09101	3.2163e-05	0.00603779
A_12_P109770	NM_001029128	wdr-5.3	-1.09095	1.54283e-05	0.00392079
A_12_P115943	NM_063395	rnh-2	-1.09071	0.000115625	0.0139724
A_12_P111399	NM_064082	F07A11.5	-1.09065	1.07672e-05	0.00311583
A_12_P172707	NM_062526	F33G12.3	-1.09056	1.69661e-05	0.00412713
A_12_P102614	NM_071803	F32D1.6	-1.08978	0.0002346	0.0226569
A_12_P116503	NM_059712	chs-1	-1.08899	0.0003687	0.0307672
A_12_P145748	NM_058555	icp-1	-1.08897	1.51661e-05	0.00388567
A_12_P103048	NM_070503	Y105C5B.15	-1.08872	0.000410466	0.0331324
A_12_P107063	NM_059263	unc-40	-1.08785	2.09933e-05	0.00463287
A_12_P135405	NM_067932	B0546.2	-1.08719	5.13607e-05	0.00827285
A_12_P113738	NM_065772	R02F2.8	-1.08694	5.26755e-05	0.00837013
A_12_P168303	NM_061572	Y51H7C.3	-1.08683	2.47482e-06	0.00121866
A_12_P103727	NM_064616	F57C2.3	-1.08659	0.00025359	0.0237908
A_12_P175119	NM_061151	npp-4	-1.08597	9.5225e-05	0.0122384
A_12_P114458	NM_064919	Y46E12BL.3	-1.08595	1.38843e-05	0.00366471
A_12_P119148	NM_069108	F20C5.3	-1.08592	0.000552921	0.040446
A_12_P106083	NM_063418	F28C6.2	-1.08588	0.000114396	0.0138554
A_12_P167531	NM_065633	cee-1	-1.08468	2.08009e-05	0.00460855
A_12_P112135	NM_069186	fem-3	-1.08454	0.000274012	0.0250794
A_12_P106819	NM_073177	acl-2	-1.08452	3.40184e-05	0.0062493
A_12_P142190	NM_001027289	Y51H7C.15	-1.08366	0.000361823	0.0304379
A_12_P153881	NM_066976	K01G5.9	-1.08338	6.35796e-06	0.00219218
A_12_P106620	NM_001026611	Y52B11A.2	-1.08306	1.84539e-05	0.00433436
A_12_P100828	NM_078460	H11L12.1	-1.08295	3.23489e-05	0.00604954
A_12_P148301	NM_001027391	sel-5	-1.08283	0.000101069	0.0127228
A_12_P106904	NM_065286	Y53G8AR.6	-1.08245	2.51158e-05	0.00518936
A_12_P168300	NM_061572	Y51H7C.3	-1.08241	4.39846e-06	0.00173977
A_12_P138372	NM_077106	cyn-8	-1.08203	0.000342818	0.0293761
A_12_P153935	NM_066425	F10E9.3	-1.08189	8.51602e-06	0.00266678
A_12_P109792	NM_001029062	chk-1	-1.08185	0.000149619	0.0165838
A_12_P116969	NM_059489	tre-1	-1.08171	2.19409e-06	0.00113573
A_12_P120211	NM_059346	C27A12.6	-1.08164	4.9394e-05	0.00804858
A_12_P147721	NM_001029012	W02F12.4	-1.08146	6.57738e-05	0.00967679
A_12_P106266	NM_064154	ash-2	-1.08069	0.000274627	0.0251181
A_12_P100272	NM_068635	spd-3	-1.08027	4.57828e-05	0.00764753
A_12_P116089	NM_061217	dog-1	-1.07936	0.00020549	0.0205634
A_12_P146720	NM_066946	Y39A1A.12	-1.07931	9.30618e-05	0.0120557
A_12_P137956	NM_069529	srb-17	-1.07927	0.000604628	0.0430799
A_12_P137375	NM_070447	Y73F8A.13	-1.07893	4.5618e-05	0.007628
A_12_P117347	NM_065579	B0393.3	-1.07816	0.000271512	0.0249494
A_12_P110604	NM_069100	F21D5.2	-1.07747	2.14372e-06	0.00111706
A_12_P111537	NM_066837	T16H12.2	-1.07597	0.000295394	0.026372
A_12_P153613	NM_001028250	pig-1	-1.07589	0.000368775	0.0307672
A_12_P109715	NM_063592	F42A8.3	-1.07562	5.59699e-05	0.00871903
A_12_P115274	NM_060198	drsh-1	-1.0756	1.91231e-05	0.00442419
A_12_P118384	NM_077105	cyn-8	-1.07467	0.000144202	0.0162217
A_12_P139861	NM_001028979	clec-36	-1.07465	0.000101196	0.0127292
A_12_P116580	NM_060627	wve-1	-1.07457	0.000448781	0.0352261
A_12_P115928	NM_001136323	W04A8.1	-1.07426	7.48608e-05	0.0105018
A_12_P108389	NM_074741	gst-44	-1.07369	0.000115986	0.0140084
A_12_P175152	NM_060627	wve-1	-1.07319	0.000116358	0.0140221
A_12_P168662	NM_058784	Y47G6A.25	-1.07309	0.000381481	0.0315057
A_12_P103864	NM_065013	M01G5.3	-1.07282	0.000106749	0.0132382
A_12_P103388	NM_063922	set-14	-1.07252	1.5627e-06	0.000915174
A_12_P118986	NM_001026872	C56E6.3	-1.0722	5.30972e-05	0.0084246
A_12_P118400	NM_060101	C17E4.3	-1.07207	7.73653e-05	0.0107433
A_12_P138373	NM_077106	cyn-8	-1.07154	0.000387027	0.0317898
A_12_P159818	NM_059696	ZK524.4	-1.07126	6.52961e-06	0.0022337
A_12_P156981	NM_078104	H40L08.3	-1.07126	0.000665268	0.0458828
A_12_P130149	NM_058798	rab-8	-1.07123	0.000211477	0.0209489
A_12_P167720	NM_077049	utx-1	-1.07113	0.000138911	0.0157758
A_12_P174268	NM_182120	bpl-1	-1.07112	0.00049709	0.0377358
A_12_P154915	NM_001047595	tag-349	-1.07106	2.82449e-05	0.00554159
A_12_P144520	NM_001027727	pph-4.2	-1.07002	0.000159146	0.0173173
A_12_P116111	NM_068235	Y17G9B.9	-1.07001	1.82726e-05	0.00430774
A_12_P148065	NM_061726	F52C6.3	-1.06955	9.47181e-05	0.0122013
A_12_P143622	NM_059963	dhfr-1	-1.06935	2.79622e-05	0.00551895
A_12_P102450	NM_067349	dro-1	-1.06897	4.46885e-05	0.00751708
A_12_P173764	NM_076648	W05H9.2	-1.06881	2.92426e-05	0.00568388
A_12_P141746	NM_073464	C03E10.3	-1.06861	0.000112017	0.0136584
A_12_P117986	NM_001029626	sli-1	-1.0686	7.5679e-05	0.0105863
A_12_P130297	NM_066191	R151.8	-1.06853	1.83295e-05	0.00431436
A_12_P145975	NM_182461	set-33	-1.06817	8.25216e-05	0.0112039
A_12_P104886	NM_065164	smg-6	-1.06797	0.000162269	0.0175447
A_12_P150647	NM_001128989	F27D4.2	-1.06742	0.000149124	0.0165704
A_12_P117315	NM_001028897	mys-3	-1.06718	0.000118928	0.0142313
A_12_P118553	NM_070961	ergo-1	-1.06692	0.000516204	0.0387425
A_12_P115038	NM_061054	F47G4.2	-1.06678	0.000146647	0.0163747
A_12_P108011	NM_074305	mcm-3	-1.06656	0.00026945	0.0248161
A_12_P119068	NM_066018	T26A5.5	-1.06648	0.000163266	0.017609
A_12_P119437	NM_075131	slr-2	-1.06592	0.000224041	0.021846
A_12_P149625	NM_071175	F22F7.2	-1.0658	0.000490656	0.0373682
A_12_P103337	NM_059136	hcp-6	-1.06575	9.25277e-06	0.00281314
A_12_P172105	NM_068896	C33H5.18	-1.06457	4.23413e-05	0.00725171
A_12_P141331	NM_062970	T14B4.9	-1.06441	0.000438688	0.0347387
A_12_P177109	NM_068086	F49F1.6	-1.06314	0.000113935	0.0138108
A_12_P135685	NM_073329	sqv-4	-1.06287	1.79872e-05	0.00427483
A_12_P163284	NM_073786	C15C8.4	-1.06265	0.000114512	0.0138635
A_12_P153300	NM_066102	T07E3.3	-1.06255	2.6693e-05	0.00537526
A_12_P108548	NM_066210	F56C9.3	-1.06218	0.000537358	0.0397973
A_12_P118352	NM_059506	ppfr-2	-1.06105	0.000177145	0.0185849
A_12_P142610	NM_001026552	Y18D10A.22	-1.06092	0.000251794	0.0236839
A_12_P159817	NM_059696	ZK524.4	-1.06068	1.45847e-05	0.00377734
A_12_P112258	NM_065346	C14B1.2	-1.06063	0.000112003	0.0136584
A_12_P176867	NM_075695	R04A9.6	-1.06037	8.74795e-05	0.0115611
A_12_P110419	NM_058785	inx-22	-1.06004	2.62801e-05	0.00532746
A_12_P134916	NM_072440	C05C8.9	-1.05985	0.000619503	0.0438215
A_12_P117265	NM_063881	C14A4.3	-1.05924	0.000193176	0.0196774
A_12_P109422	NM_076479	T03G11.6	-1.05895	9.38178e-05	0.0121205
A_12_P113221	NM_170969	B0432.13	-1.05886	0.000218151	0.021426
A_12_P145630	NM_001029781	Y13C8A.2	-1.05884	0.000209943	0.0208432
A_12_P102489	NM_170808	Y51F10.6	-1.05884	1.00464e-06	0.000682002
A_12_P139868	NM_078171	rab-14	-1.05852	2.10863e-05	0.00464268
A_12_P140857	NM_001026479	hmr-1	-1.05836	0.000746364	0.0497504
A_12_P157090	NM_076828	sur-5	-1.05768	0.000130585	0.0151529
A_12_P110561	NM_075988	F53B1.2	-1.05733	0.000240991	0.0230173
A_12_P101535	NM_001083193	C17H12.13	-1.05728	1.02225e-05	0.00301341
A_12_P167309	NM_171363	puf-11	-1.05683	0.000280191	0.0254668
A_12_P130945	NM_001129166	T12C9.7	-1.05662	4.23396e-05	0.00725171
A_12_P150070	NM_001026317	F53F10.8	-1.05652	3.02281e-05	0.00579988
A_12_P178359	NM_003279	T23D8.7	-1.05638	0.000649497	0.0451763
A_12_P112184	NM_059013	Y119C1A.1	-1.05637	0.000122761	0.0145668
A_12_P100833	NM_059743	gna-2	-1.05584	0.000119838	0.0143053
A_12_P175240	NM_073668	T04H1.2	-1.05511	0.000363134	0.0305041
A_12_P103435	NM_171101	C32A3.3	-1.0547	0.000378612	0.0313017
A_12_P130199	NM_001026039	pal-1	-1.05464	9.2184e-05	0.011989
A_12_P134216	NM_001047722	fog-2	-1.05435	0.000278053	0.0253018
A_12_P139867	NM_078171	rab-14	-1.05358	7.31469e-05	0.0103689
A_12_P109532	NM_066927	rab-30	-1.0534	8.83858e-05	0.0116573
A_12_P116237	NM_076190	dhs-27	-1.05278	1.86343e-05	0.00436728
A_12_P101456	NM_058821	C32E8.9	-1.05244	1.19019e-05	0.00333388
A_12_P105112	NM_059856	mei-1	-1.05243	6.81393e-06	0.0022989
A_12_P139542	NM_001028187	T04C4.1	-1.05213	0.000331501	0.0287645
A_12_P114217	NM_070006	let-99	-1.05139	0.000209931	0.0208432
A_12_P145580	NM_001028392	mdf-2	-1.05099	4.49239e-05	0.00754581
A_12_P135689	NM_073329	sqv-4	-1.05054	1.56192e-05	0.00395136
A_12_P118811	NM_059789	T22C1.4	-1.05015	0.000556478	0.0406357
A_12_P100650	NM_078364	C08A9.6	-1.04993	7.92481e-05	0.0109384
A_12_P157770	NM_060284	C25A1.12	-1.04988	2.22523e-05	0.00479207
A_12_P101284	NM_066363	grp-1	-1.04932	8.87734e-06	0.00274488
A_12_P108104	NM_059382	T09B4.1	-1.04909	3.3756e-05	0.00621511
A_12_P167722	NM_077049	utx-1	-1.04859	9.50988e-05	0.0122325
A_12_P114612	NM_065626	tag-340	-1.04851	0.000157291	0.0172025
A_12_P153614	NM_001028250	pig-1	-1.04845	0.000429086	0.034227
A_12_P112338	NM_001128950	C18E3.9	-1.0479	2.95745e-05	0.00572522
A_12_P146598	NM_063836	gpd-1	-1.0473	2.11548e-05	0.00464793
A_12_P135686	NM_073329	sqv-4	-1.04677	4.99566e-05	0.00812002
A_12_P106876	NM_063940	egg-3	-1.04633	0.000362455	0.0304732
A_12_P142940	NM_073530	duo-1	-1.04628	6.6192e-05	0.00971646
A_12_P100107	NM_065307	K01A11.1	-1.04615	0.000100842	0.0127181
A_12_P107021	NM_065249	daf-2	-1.04591	6.80716e-07	0.000522693
A_12_P119003	NM_062699	F59E12.9	-1.04544	0.000179199	0.0187102
A_12_P139290	NM_065457	mcm-5	-1.04487	0.000146328	0.0163623
A_12_P116321	NM_060330	Y106G6H.6	-1.04456	2.64711e-05	0.00534564
A_12_P135688	NM_073329	sqv-4	-1.04332	2.40749e-05	0.00504614
A_12_P159996	NM_073227	ZK856.12	-1.04328	0.000359118	0.0302834
A_12_P181434	NM_060192	F26E4.3	-1.04273	0.000153698	0.0168928
A_12_P100223	NM_058288	F56C11.5	-1.04246	4.1748e-05	0.00719407
A_12_P130120	NM_067053	rab-35	-1.04236	0.000520365	0.0389876
A_12_P118105	NM_182223	T13C2.6	-1.04219	8.29667e-05	0.011241
A_12_P109995	NM_066761	R10E11.3	-1.04208	0.000109863	0.0134795
A_12_P119941	NM_001026264	F31C3.6	-1.04192	0.000621545	0.0439184
A_12_P117376	NM_063022	F22D3.5	-1.04189	2.04235e-05	0.0045685
A_12_P105944	NM_067188	gmn-1	-1.04155	0.000672449	0.0462169
A_12_P138231	NM_001026032	ced-4	-1.04089	0.000528715	0.0393801
A_12_P111058	NM_076773	C16E9.2	-1.04043	0.000113458	0.013787
A_12_P111743	NM_068896	C33H5.18	-1.04039	0.00028183	0.0255683
A_12_P102907	NM_075871	sedl-1	-1.03987	1.66523e-05	0.00407863
A_12_P168660	NM_058784	Y47G6A.25	-1.03969	4.72252e-05	0.0078351
A_12_P150785	NM_069301	trcs-1	-1.03968	0.000656601	0.0454592
A_12_P101563	NM_063247	T09A5.4	-1.0396	0.000386721	0.0317771
A_12_P100338	NM_062227	fbxc-52	-1.03875	0.000261934	0.0243315
A_12_P133825	NM_066363	grp-1	-1.0387	4.23122e-05	0.00725171
A_12_P117399	NM_001047640	egl-9	-1.03864	0.000201351	0.0202837
A_12_P175293	NM_067782	M70.4	-1.03853	0.000140362	0.0158991
A_12_P100942	NM_065841	SR-famA	-1.03852	0.000634583	0.044511
A_12_P139800	NM_171245	eri-1	-1.03808	1.65171e-05	0.00405816
A_12_P144170	NM_001047575	Y55F3BR.10	-1.03757	0.000496041	0.0376833
A_12_P172933	NM_062641	F56D1.1	-1.03696	2.53387e-05	0.00520237
A_12_P154295	NR_000060	F53F10.6	-1.03583	0.000287005	0.0258584
A_12_P116236	NM_069925	dnj-26	-1.03483	0.000403686	0.0328146
A_12_P110952	NM_067416	acbp-5	-1.03418	1.95192e-05	0.00447362
A_12_P155443	NM_001083148	W01A8.8	-1.03414	0.000108728	0.0133863
A_12_P139921	NM_068065	pcn-1	-1.03404	0.000430301	0.0343086
A_12_P144615	NM_001129362	ZK180.7	-1.03362	6.84846e-05	0.00992306
A_12_P109237	NM_063553	rhy-1	-1.03336	0.00017744	0.0186108
A_12_P108633	NM_062146	C16C8.12	-1.0331	8.55443e-05	0.0114596
A_12_P150645	NM_001128989	F27D4.2	-1.03298	0.000248389	0.0234734
A_12_P118082	NM_060048	mel-26	-1.03282	5.9216e-05	0.00907579
A_12_P167721	NM_077049	utx-1	-1.03218	9.92446e-05	0.0126146
A_12_P172712	NM_064178	set-24	-1.03188	0.000102803	0.0128874
A_12_P139291	NM_065457	mcm-5	-1.03155	0.000555671	0.0405993
A_12_P110164	NM_171592	Y39B6A.16	-1.03098	1.22146e-05	0.00339048
A_12_P130118	NM_067053	rab-35	-1.03071	0.000506086	0.0382233
A_12_P111609	NM_066174	eip-24	-1.03063	7.16542e-06	0.00238054
A_12_P119303	NM_073668	T04H1.2	-1.03011	0.000352476	0.0299479
A_12_P110295	NM_075881	dhs-25	-1.02962	6.37099e-06	0.00219282
A_12_P147722	NM_001029012	W02F12.4	-1.02946	0.000749704	0.0498838
A_12_P157040	NM_071798	mcm-7	-1.0294	4.24502e-05	0.00725583
A_12_P138101	NM_001129208	C29E4.13	-1.02927	0.000249186	0.0235374
A_12_P167529	NM_065633	cee-1	-1.02921	3.38077e-05	0.00621908
A_12_P109550	NM_061442	T07D3.9	-1.02912	2.88846e-05	0.00563062
A_12_P154869	NM_060967	Y48G10A.4	-1.02893	5.20411e-05	0.00833114
A_12_P102444	NM_070121	B0564.2	-1.02882	4.66852e-05	0.00776191
A_12_P130827	NM_070739	W03F9.2	-1.02867	3.06649e-05	0.00585506
A_12_P147366	NM_001029013	W02F12.4	-1.02856	0.000435	0.0345652
A_12_P105696	NM_075571	F26F2.7	-1.0282	0.000512217	0.0385022
A_12_P177375	NM_060238	sys-1	-1.02811	6.66064e-05	0.0097457
A_12_P166946	NM_063806	T01E8.4	-1.02797	0.000283774	0.0256616
A_12_P118234	NM_062141	C16C8.4	-1.02788	0.000101028	0.0127217
A_12_P159140	NM_059059	F57C9.4	-1.02729	2.13568e-05	0.00466453
A_12_P103496	NM_065705	ZC155.4	-1.02705	2.10846e-05	0.00464268
A_12_P115275	NM_182109	mab-3	-1.02685	0.000149276	0.0165739
A_12_P100945	NM_062941	vps-33.2	-1.02669	0.000349695	0.0298108
A_12_P150142	NM_0012700324	H40L08.2a	-1.02643	0.000539078	0.039857
A_12_P144731	NM_060978	Y87G2A.7	-1.02642	0.000106203	0.0131788
A_12_P103875	NM_061282	F48A11.4	-1.02606	0.000123193	0.0145916
A_12_P103605	NM_067525	daf-18	-1.02589	7.89948e-06	0.00253223
A_12_P174567	NM_001027021	bcs-1	-1.02581	3.13101e-05	0.00593494
A_12_P157436	NM_001129372	pcm-1	-1.02566	9.0806e-05	0.0118609
A_12_P102529	NM_066846	ZK1128.2	-1.02458	5.90958e-05	0.00906124
A_12_P142465	NM_062651	cyp-44A1	-1.02385	4.61515e-06	0.00178763
A_12_P159995	NM_073227	ZK856.12	-1.02372	0.000566206	0.0411569
A_12_P113194	NM_066981	K11D9.3	-1.02337	2.84907e-05	0.00557871
A_12_P107583	NM_071554	T20D4.6	-1.02334	0.000239752	0.0229603
A_12_P174553	NM_062779	vps-35	-1.02312	7.67255e-05	0.0106877
A_12_P177673	NM_078439	F31A3.5	-1.02311	0.000420067	0.0336719
A_12_P174648	NM_062820	F21H12.6	-1.02276	0.000621123	0.0438997
A_12_P143305	NM_059058	F57C9.4	-1.02235	1.87648e-05	0.00438788
A_12_P153015	NM_065017	Y67D2.5	-1.02228	1.58271e-05	0.00397577
A_12_P113998	NM_067053	rab-35	-1.02185	0.000274492	0.0251117
A_12_P153726	NM_060230	T24D1.2	-1.02133	6.03862e-06	0.00213363
A_12_P139866	NM_078171	rab-14	-1.02118	7.15074e-05	0.0102085
A_12_P113033	NM_076034	C43H6.7	-1.02113	0.000123767	0.0146187
A_12_P173108	NM_073938	bath-39	-1.02087	0.000730145	0.0489644
A_12_P147826	NM_001028107	lag-1	-1.02035	0.000414543	0.0333381
A_12_P148260	NM_001128988	drsh-1	-1.01987	8.23057e-06	0.00260651
A_12_P106651	NM_061024	W04A8.6	-1.01959	0.000252499	0.0237304
A_12_P106424	NM_069084	F08B4.3	-1.01909	5.32336e-05	0.00843941
A_12_P119484	NM_062650	fzy-1	-1.01856	6.51007e-05	0.00962105
A_12_P175117	NM_061151	npp-4	-1.01855	3.21418e-05	0.00603779
A_12_P130198	NM_001026039	pal-1	-1.01839	7.0316e-05	0.01011
A_12_P106729	NM_064426	Y48E1C.1	-1.01799	5.26336e-05	0.00837013
A_12_P143875	NM_001026039	pal-1	-1.01782	8.073e-05	0.011064
A_12_P109048	NM_061631	ZC204.2	-1.01772	0.00012944	0.0150575
A_12_P144920	NM_069730	his-47	-1.01743	0.000258551	0.0241107
A_12_P107791	NM_001129019	K04F10.3	-1.01725	3.83428e-05	0.00679836
A_12_P119721	NM_074040	T22G5.3	-1.01658	0.00031726	0.0278739
A_12_P172102	NM_068896	C33H5.18	-1.01656	5.06429e-05	0.00819423
A_12_P103078	NM_059696	ZK524.4	-1.01632	0.000195049	0.0198065
A_12_P152807	NM_001027778	gly-11	-1.01604	0.000344078	0.0294516
A_12_P147881	NM_001026382	dut-1	-1.01595	0.000116923	0.0140483
A_12_P109927	NM_001026228	rde-2	-1.0158	6.55999e-05	0.009664
A_12_P100501	NM_060138	lem-3	-1.01548	4.40473e-05	0.00743358
A_12_P105276	NM_073452	T19B10.6	-1.01537	9.56343e-05	0.0122669
A_12_P100184	NM_077239	T09B9.4	-1.01525	7.00819e-05	0.0100875
A_12_P109222	NM_063522	F44G4.6	-1.01525	0.000732573	0.0490853
A_12_P154867	NM_060967	Y48G10A.4	-1.0145	6.98241e-05	0.0100651
A_12_P159066	NM_063124	cul-4	-1.01417	0.000116418	0.0140251
A_12_P139865	NM_078171	rab-14	-1.01357	1.68732e-05	0.00411382
A_12_P130200	NM_001026039	pal-1	-1.01343	7.62891e-05	0.0106602
A_12_P180484	NM_060067	gip-2	-1.01307	3.92905e-05	0.00691328
A_12_P100352	NM_073227	ZK856.12	-1.01265	0.00075155	0.0499812
A_12_P111358	NM_076972	C02B8.1	-1.01232	0.000618443	0.0437826
A_12_P106349	NM_001047647	F33E11.6	-1.01223	0.00054235	0.0399934
A_12_P111251	NM_059531	unc-37	-1.01087	4.07732e-06	0.00167523
A_12_P109759	NM_074110	ZC376.4	-1.01057	0.00067116	0.0461445
A_12_P130347	NM_071752	nhr-57	-1.01056	0.000535254	0.0397014
A_12_P111587	NM_062111	bath-30	-1.01052	0.00062873	0.0442582
A_12_P173892	NM_078257	PHD-finger	-1.00964	5.33797e-05	0.00844765
A_12_P140371	NM_060067	gip-2	-1.0094	2.76467e-05	0.00549352
A_12_P135202	NM_001047751	C05D9.9	-1.00774	0.000240181	0.022981
A_12_P103917	NM_001026886	pme-2	-1.00767	4.87274e-05	0.00799641
A_12_P106721	NM_001026719	cyn-10	-1.00757	5.05315e-06	0.00189735
A_12_P119634	NM_063329	dab-1	-1.00722	0.000100936	0.0127217
A_12_P175120	NM_061151	npp-4	-1.0068	1.93593e-05	0.00446055
A_12_P159819	NM_059696	ZK524.4	-1.00615	6.58261e-06	0.00224789
A_12_P106747	NM_069076	dgk-4	-1.00599	0.000148231	0.0164906
A_12_P117901	NM_069808	inx-8	-1.00593	8.5309e-05	0.0114406
A_12_P116232	NM_063973	C09H10.10	-1.00574	0.00030653	0.0271562
A_12_P171853	NM_066349	F44B9.8	-1.0057	0.000297361	0.0264912
A_12_P107401	NM_064180	Y57A10A.1	-1.00567	0.000273857	0.025077
A_12_P113928	NM_059218	cpd-1	-1.00538	0.00045403	0.0354799
A_12_P130512	NM_001029553	egl-15	-1.00523	0.000366836	0.0306916
A_12_P159475	NM_061054	F47G4.2	-1.00483	8.31676e-05	0.0112445
A_12_P101631	NM_072670	ZC513.5	-1.0048	1.99058e-05	0.00451255
A_12_P131010	NM_001027527	R01H2.7	-1.0046	4.66131e-05	0.0077532
A_12_P177670	NM_078439	F31A3.5	-1.00418	0.00050302	0.0380514
A_12_P166264	NM_171092	H06I04.1	-1.00399	5.23789e-05	0.00836275
A_12_P151294	NM_071876	hil-4	-1.00379	0.000146952	0.0163948
A_12_P130114	NM_076183	ZK563.5	-1.00375	0.000183732	0.0190266
[truncated: 1,710 more rows]

## Sheet: Statistical data for all genes
AgilentID	GenbankAccession	GeneSymbol	logFC L3_S - L4_W	P.Value L3_S - L4_W	FDR L3_S - L4_W	logFC L4_S - YA_W	P.Value L4_S - YA_W	FDR L4_S - YA_W
A_12_P100000	NM_001047268	fbxa-158	2.37643	0.0159062	0.53239	1.60336	0.07954	1
A_12_P100002	NM_071140	fbxa-201	-2.08375	2.48133e-05	0.00503572	1.10341	0.00315433	0.138961
A_12_P100003	NM_075964	F52D2.6	-0.774722	0.039907	1	-2.06279	8.52357e-05	0.0114406
A_12_P100004	NM_064828	W06E11.1	0.558575	0.0166573	0.551973	0.0262161	0.895849	1
A_12_P100005	NM_074719	oac-7	-1.17959	0.00203259	0.113512	-1.25082	0.00136585	0.0760827
A_12_P100006	NM_075535	B0250.4	0.621443	0.00338519	0.165826	-0.353062	0.0558889	1
A_12_P100007	NM_063696	cutl-2	-0.941176	0.0172332	0.566654	-2.19298	5.41965e-05	0.00853323
A_12_P100008	NM_001027708	Y47D3A.32	-2.18012	9.33276e-07	0.00087126	-0.838125	0.0024128	0.114358
A_12_P100010	NM_061410	F46F5.1	-1.38495	0.24146	1	1.9828	0.104757	1
A_12_P100011	NM_073343	F28H7.7	0.4803	0.0156313	0.525563	0.490031	0.0141242	0.42598
A_12_P100012	NM_077520	F29G6.2	0.143078	0.418215	1	0.347605	0.0670073	1
A_12_P100014	NM_071861	K03B4.2	0.0187467	0.901627	1	-0.512982	0.00587375	0.2208
A_12_P100015	NM_070898	srx-5	1.76455	0.179299	1	-1.82881	0.165324	1
A_12_P100016	NM_068156	Y24D9A.6	0.470585	0.314141	1	1.09353	0.0332278	0.826274
A_12_P100019	NM_066930	Y45F3A.5	1.45326	0.000126274	0.0143955	1.20698	0.000536263	0.0397537
A_12_P100020	NM_069154	C53B4.2	-3.90421	3.28795e-06	0.00177469	0.687317	0.140025	1
A_12_P100021	NM_070155	Y67H2A.5	0.345318	0.0532057	1	-0.162959	0.326146	1
A_12_P100022	NM_069219	Y11D7A.14	1.12585	5.68457e-05	0.00841509	0.387262	0.0466213	1
A_12_P100023	NM_001028042	F49E8.7	0.457707	0.00460208	0.209124	-0.693278	0.000254183	0.0238316
A_12_P100024	NM_063214	B0495.5	0.0380844	0.785091	1	-0.367652	0.0218485	0.59637
A_12_P100025	NM_064511		0.144531	0.445292	1	-0.834221	0.000956372	0.0590397
A_12_P100026	NM_067921	cyp-25A5	0.635664	0.00248683	0.131647	0.240888	0.161472	1
A_12_P100027		R05D7.2	-2.13962	0.000258	0.024126	0.964163	0.033196	0.825762
A_12_P100028	NM_075700	ZK1193.4	0.344016	0.114192	1	0.311168	0.148638	1
A_12_P100029	NM_062964	rpy-1	0.668433	0.0172636	0.567445	0.349126	0.168368	1
A_12_P100030	NM_073312	T21C9.4	0.331172	0.0221075	0.687519	-0.494083	0.00233549	0.111795
A_12_P100031	NM_058850	C50F2.2	-0.177671	0.496154	1	-0.43357	0.115165	1
A_12_P100032	NM_071216	cyp-33C6	-0.202678	0.539512	1	0.7357	0.0434457	1
A_12_P100035	NM_058776	rnp-6	0.0714064	0.583412	1	-0.309466	0.0335661	0.832681
A_12_P100036	NM_071620	srx-41	0.203926	0.126423	1	-0.123388	0.337217	1
A_12_P100037	NM_063714	cyp-13A8	-2.05261	0.00705593	0.288586	-0.764078	0.23903	1
A_12_P100039	NM_001026148	C09G4.4	-0.215387	0.22989	1	-0.671336	0.00250037	0.117383
A_12_P100040	NM_076723	F38B6.3	0.149471	0.462599	1	0.789556	0.00229933	0.110669
A_12_P100041	NM_001029066	Y42A5A.5	-0.0904974	0.627686	1	-0.550136	0.0122076	0.381428
A_12_P100042	NM_063540	T24H10.1	0.376622	0.103852	1	-0.712781	0.00681682	0.246339
A_12_P100043	NM_076799	hen-1	0.922055	0.00266374	0.13838	-0.308982	0.215406	1
A_12_P100044	NM_171286	Y38F2AL.6	0.183849	0.257488	1	-0.288337	0.0887859	1
A_12_P100045	NM_066825	M04D8.5	0.29262	0.436246	1	0.483493	0.209677	1
A_12_P100048	NM_064742	fbxa-58	1.73522	0.000663426	0.0483341	1.14603	0.0095259	0.316301
A_12_P100049	NM_070591	Y116A8A.2	-1.93488	0.0209213	0.658508	0.954871	0.207396	1
A_12_P100050	NM_075941	ceh-39	0.882362	0.000174791	0.0182016	-2.11162	6.60593e-08	0.000112656
A_12_P100053	NM_001047355	cdc-37	-0.257322	0.204446	1	-0.25963	0.20073	1
A_12_P100054	NM_072899	K06C4.9	0.650235	0.0111233	0.406721	0.192503	0.380895	1
A_12_P100056	NM_059252	F55F8.3	0.373373	0.0497138	1	-0.113004	0.515538	1
A_12_P100057	NM_073647	asparaginase	-0.15518	0.430474	1	-0.246634	0.220669	1
A_12_P100058	NM_074438	T26H5.8	0.663054	0.0346678	0.963712	1.20516	0.00122015	0.0701884
A_12_P100059	NM_001028218	pxf-1	0.037551	0.813452	1	-0.126627	0.432809	1
A_12_P100061	NM_063075	F10E7.3	-0.459272	0.240889	1	-1.13016	0.0116978	0.369405
A_12_P100062	NM_059268	C04F1.1	-1.37972	0.000336609	0.0293504	-1.72302	5.61328e-05	0.00874012
A_12_P100063	NM_077523	sdc-2	0.247081	0.317929	1	-0.137418	0.571899	1
A_12_P100064	NM_069038	syn-4	0.0023226	0.98912	1	-0.418178	0.0301839	0.767856
A_12_P100065	NM_071072	K04F1.10	0.0342175	0.937457	1	0.123099	0.778127	1
A_12_P100066	NM_073801	ugt-6	0.797732	0.100925	1	2.2755	0.00040893	0.0330696
A_12_P100067	NM_066226	numr-1	1.46171	0.0188503	0.606859	1.12637	0.0566954	1
A_12_P100068	NM_062314	W06A11.4	0.20006	0.228778	1	-0.733109	0.000808008	0.052663
A_12_P100069	NM_062380	ZK430.7	0.244125	0.111502	1	-0.173408	0.243635	1
A_12_P100070	NM_068835	tag-199	1.21632	0.0138733	0.481815	1.99111	0.000630368	0.0442945
A_12_P100071	NM_069827	scl-18	-5.28142	0.000581297	0.0437478	-0.55913	0.614443	1
A_12_P100072	NM_071517	F35F10.1	0.574092	0.578919	1	-0.505453	0.624509	1
A_12_P100073	NM_064671	W01D2.1	-0.048403	0.718422	1	-0.205383	0.146182	1
A_12_P100074	NM_068178	gbb-2	0.520467	0.0286621	0.83448	0.0573276	0.784759	1
A_12_P100075	NM_064023	B0491.5	0.0661729	0.576192	1	-0.0878895	0.460529	1
A_12_P100076	NM_068624	C01B10.7	-0.0978435	0.715461	1	-0.405743	0.150552	1
A_12_P100077	NM_075482	Y113G7A.13	0.293423	0.433785	1	-0.635893	0.107285	1
A_12_P100078	NM_077757	F11C1.2	0.493009	0.0246355	0.744367	0.16194	0.406919	1
A_12_P100079	NM_171676	ZC449.3	0.104961	0.618041	1	0.338225	0.1279	1
A_12_P100080	NM_069432	C04G2.5	-4.29222	8.35846e-06	0.00278409	0.986236	0.0882904	1
A_12_P100082	NM_060426	C35E7.10	-2.68867	0.000544411	0.0416888	1.02729	0.0872205	1
A_12_P100084	NM_074290	fib-1	0.258071	0.246181	1	-0.341772	0.133684	1
A_12_P100085			0.94338	0.00175806	0.101519	-0.416194	0.0931727	1
A_12_P100086	NM_071309	C29G2.1	1.85363	8.71073e-05	0.0111586	-1.1287	0.0033296	0.14472
A_12_P100087	NM_001047167	B0261.4	0.0549292	0.760308	1	0.300184	0.116971	1
A_12_P100088	NM_062950	T19D12.7	0.942772	0.000920932	0.0618752	0.143203	0.499708	1
A_12_P100089	NM_072281	cpr-4	-0.759032	0.0316741	0.898894	0.0283812	0.927681	1
A_12_P100090	NM_058937	tufm-2	0.00519306	0.964072	1	-0.085432	0.464786	1
A_12_P100091	NM_070672	ifta-2	0.873681	0.0102956	0.38375	0.620688	0.0493705	1
A_12_P100093	NM_074192	R02D5.3	0.398954	0.104704	1	1.03977	0.000873596	0.0555375
A_12_P100094	NM_074188	clec-56	-0.211764	0.179104	1	0.20953	0.183336	1
A_12_P100096	NM_064071	F54D5.4	-0.289652	0.0938631	1	0.162272	0.324595	1
A_12_P100097	NM_067051	Y47D3A.22	-0.678868	0.0123699	0.440959	0.284502	0.232091	1
A_12_P100098	NM_071942	ugt-7	-0.638525	0.00720909	0.293339	-0.34968	0.0961418	1
A_12_P100100	NM_075843	F21E9.2	-2.71153	0.00191511	0.108308	1.50448	0.0438077	1
A_12_P100101	NM_001047410	T23G5.2	0.00129915	0.995215	1	-0.705585	0.00731852	0.25978
A_12_P100102	NM_077823	C49F8.1	4.32366	0.00365047	0.175878	3.5786	0.0109136	0.350398
A_12_P100103	NM_074595	srw-59	-2.1806	0.0741423	1	1.28289	0.268469	1
A_12_P100104	NM_071709	nlp-28	0.986248	0.0434533	1	-0.0590538	0.892946	1
A_12_P100106	NM_076953	C18A11.4	-0.561916	0.229742	1	-2.78925	7.73765e-05	0.0107433
A_12_P100107	NM_065307	K01A11.1	-0.0709641	0.685634	1	-1.04615	0.000100842	0.0127181
A_12_P100108	NM_070039	pin-2	0.443689	0.132363	1	0.763816	0.0179671	0.51294
A_12_P100109	NM_001047271	math-4	0.100956	0.689534	1	0.750603	0.0118614	0.373221
A_12_P100110	NM_066267	T04A6.2	-0.517707	0.29531	1	-1.44273	0.0114991	0.364614
A_12_P100111	NM_001029346	pkc-2	-0.397503	0.0327668	0.922302	0.738779	0.000949102	0.0587852
A_12_P100112	NM_171162	C56G2.9	0.412343	0.0426079	1	-0.651308	0.00426394	0.173374
A_12_P100113	NM_001028325	lad-2	0.710728	0.00427814	0.197951	0.997559	0.000416532	0.0334421
A_12_P100114	NM_071927	C02E7.1	2.05751	0.0144557	0.496418	1.35578	0.0807422	1
A_12_P100115	NM_072697	spr-1	0.18807	0.244254	1	-0.820803	0.000284305	0.0256964
A_12_P100116	NM_065837	B0244.9	-3.19072	1.60232e-05	0.00396162	0.856051	0.0675342	1
A_12_P100117	NM_059050	zig-7	-0.377598	0.0220714	0.686724	-0.240169	0.116449	1
A_12_P100119	NM_062556	srb-12	1.44413	0.0251054	0.755597	1.33897	0.0349175	0.858875
A_12_P100120	NM_077007	peptidase	0.123033	0.520042	1	0.994412	0.000287763	0.0259089
A_12_P100121	NM_062996	F31E8.1	0.815564	0.0295226	0.853104	0.173292	0.602572	1
A_12_P100122	NM_076398	F16H11.1	-0.988199	0.000404827	0.033462	-0.440862	0.0439405	1
A_12_P100123	NM_068511	ugt-19	-1.81646	0.000370535	0.0314578	0.19861	0.581181	1
A_12_P100125	NM_069264	F59B8.2	-0.813394	0.000153443	0.0165351	-0.465694	0.00731039	0.259656
A_12_P100126	NM_001028385	mca-3	0.343876	0.0933505	1	-0.608381	0.00815839	0.281866
A_12_P100127	NM_063575	C01G6.4	0.609041	0.00590257	0.252822	-0.63329	0.00467788	0.186268
A_12_P100129	NM_001026219	ppfr-1	1.16156	0.00133899	0.0824913	0.00768381	0.977505	1
A_12_P100130	NM_065977	F47D12.5	0.693823	0.00301484	0.151855	-1.42819	1.09287e-05	0.00314841
A_12_P100131	NM_075159	F16H6.5	-0.318937	0.0737597	1	-1.65193	1.01312e-06	0.000685385
A_12_P100135	NM_001027308	ife-5	-0.433575	0.0684118	1	-0.154513	0.484149	1
A_12_P100136	NM_073225	tag-315	0.04946	0.727851	1	-0.950962	3.9055e-05	0.00688728
A_12_P100137	NM_064730	col-88	3.05999	8.81427e-09	9.12813e-05	10.0076	5.77505e-14	2.26598e-08
A_12_P100138	NM_001027006	lin-42	-0.403004	0.230694	1	-0.37299	0.264885	1
A_12_P100139	NM_062284	F53C3.8	-0.0997552	0.654278	1	0.391494	0.0997649	1
A_12_P100140			0.0480607	0.882291	1	0.00810691	0.980063	1
A_12_P100141	NM_001026194	srh-2	-0.30867	0.337902	1	-0.397399	0.224009	1
A_12_P100142	NM_064240	dct-12	0.639032	0.350777	1	0.10494	0.875561	1
A_12_P100143	NM_059166	fbxa-145	0.541054	0.0087319	0.339495	-0.882497	0.000336988	0.0290414
A_12_P100144	NM_061468	C32B5.6	0.748592	0.0101813	0.380544	-0.52882	0.0500487	1
A_12_P100145	NM_066628	F54G8.1	0.813047	0.00350005	0.170114	0.756865	0.00541743	0.207564
A_12_P100146	NM_061356	C09E8.1	-0.175697	0.182132	1	0.614585	0.000499931	0.0378908
A_12_P100147	NM_077257	mrp-4	-0.556651	0.010792	0.397794	-1.51711	6.19489e-06	0.00215564
A_12_P100148	NM_073371	F32D8.3	-0.590067	0.0577959	1	1.09037	0.002632	0.121784
A_12_P100149	NM_071899	nex-4	0.949149	0.00391497	0.185339	0.532131	0.0637265	1
A_12_P100150	NM_066976	K01G5.9	0.148351	0.257395	1	-0.601703	0.000619473	0.0438215
A_12_P100151	NM_074931	ZK218.4	-0.512851	0.332261	1	-0.093852	0.85588	1
A_12_P100152	NM_069733		-0.799233	0.0087279	0.339373	-0.134511	0.59785	1
A_12_P100153	AF273831		0.00256839	0.992124	1	-0.0928693	0.721996	1
A_12_P100154	NM_001129399	C32C4.1	1.51188	9.41191e-05	0.0117387	1.40495	0.000170602	0.0181213
A_12_P100155	NM_070496	Y105C5B.8	-0.502602	0.37233	1	0.726702	0.206477	1
A_12_P100156	NM_062420	dyf-14	0.321341	0.0465032	1	-0.159044	0.288035	1
A_12_P100157	NM_066191	R151.8	0.266271	0.0691311	1	-0.800547	0.000105593	0.0131321
A_12_P100158	NM_065945	rpn-2	-0.0412482	0.752511	1	-0.269807	0.0595901	1
A_12_P100159	NM_059260	T19B4.5	0.251108	0.161662	1	-0.499119	0.0130863	0.401967
A_12_P100160	NM_078229	col-187	2.62422	0.000142861	0.015715	0.524844	0.266058	1
A_12_P100161	NM_061905	D2062.7	-3.45942	0.000747572	0.0528139	0.576158	0.447602	1
A_12_P100163	NM_062946	F54H5.2	-1.64104	0.000402075	0.0332906	1.14006	0.00484688	0.191212
A_12_P100164	NM_001026614	Y52B11A.3	0.0194339	0.897238	1	-0.414343	0.0177442	0.508762
A_12_P100165	NM_076503	C26B9.6	0.13499	0.569014	1	0.0383968	0.870337	1
A_12_P100166	NM_062965	dpy-10	-9.11436	7.59649e-08	0.000212905	-1.39229	0.0650279	1
A_12_P100169		F32D8.12	0.957678	0.0508788	1	-0.00211788	0.996191	1
A_12_P100170	NM_061917	F22E5.12	0.736025	0.0034943	0.169961	-0.258297	0.213904	1
A_12_P100171		com-1	0.121737	0.777258	1	0.15006	0.727581	1
A_12_P100172	NM_074199	tag-191	-3.2202	3.53816e-06	0.00183422	1.16349	0.00838655	0.287561
A_12_P100173	NM_001029598	vem-1	-0.156298	0.35454	1	0.706699	0.00130337	0.073637
A_12_P100174	NM_059647	R06C7.6	0.0576911	0.795201	1	-0.505347	0.0412964	0.976831
A_12_P100177	NM_061190	eva-1	0.492258	0.00601056	0.256262	1.11326	1.29075e-05	0.00350249
A_12_P100178	NM_069696	prx-14	-0.14265	0.427553	1	-0.585126	0.00670718	0.243228
A_12_P100179	NM_068879	C33H5.7	-0.110542	0.495104	1	-0.666977	0.00156847	0.0839831
A_12_P100180	NM_074645	srj-10	1.17596	0.23214	1	-0.338625	0.721964	1
A_12_P100181	NM_078371	K09E3.2	0.1501	0.524995	1	-0.0324026	0.889781	1
A_12_P100182	NM_069710	gtl-1	0.796906	0.00044409	0.0358546	0.605403	0.00302097	0.134577
A_12_P100183	NM_068197	col-110	-9.39262	9.97754e-07	0.000904162	-2.33366	0.0275765	0.715584
A_12_P100184	NM_077239	T09B9.4	0.423421	0.0228721	0.704045	-1.01525	7.00819e-05	0.0100875
A_12_P100185	NM_069558	C43F9.7	0.519133	0.192536	1	-1.02461	0.0199922	0.556342
A_12_P100187	NM_072607	C26F1.3	0.190019	0.221013	1	-0.432955	0.0137546	0.417203
A_12_P100188	NM_061613	fbxa-166	-0.282133	0.434977	1	-0.234571	0.514287	1
A_12_P100189	NM_063564	ZK1067.3	0.00147678	0.992768	1	-0.679105	0.00156203	0.0837459
A_12_P100191	NM_065810	daf-4	0.207898	0.097521	1	-0.59615	0.00035983	0.0303305
A_12_P100192		kri-1	-0.216088	0.425416	1	-0.634212	0.0346077	0.85227
A_12_P100193	NM_077123	T25B6.5	3.30737	1.79631e-06	0.00126313	2.01566	0.0001368	0.0156401
A_12_P100194	NM_064087	rad-23	-0.462304	0.0060879	0.258494	-0.728982	0.000268034	0.024711
A_12_P100196	NM_076087	C14A11.5	0.449803	0.300983	1	0.657399	0.141781	1
A_12_P100197	NM_067894	T23E1.2	0.344855	0.0275271	0.809788	-0.780224	0.000157394	0.0172074
A_12_P100198	NM_076832	T08A9.5	0.330257	0.157391	1	-1.57121	2.45087e-05	0.00510083
A_12_P100199	NM_065744	Y32H12A.1	-0.0747741	0.63942	1	-0.512208	0.00771084	0.27021
A_12_P100200	NM_071155	Y40B10A.4	-2.61229	6.88255e-05	0.00956157	1.58463	0.00284751	0.128631
A_12_P100201	NM_182358	R10E8.8	-0.194957	0.298477	1	0.393211	0.0510918	1
A_12_P100202	NM_001027463	gip-1	0.0509016	0.761732	1	-0.795527	0.000617798	0.043756
A_12_P100203	NM_077601	sams-1	0.247329	0.377229	1	-0.401058	0.164681	1
A_12_P100204	NM_078311	mec-4	0.840111	0.0284871	0.830434	-0.503367	0.157024	1
A_12_P100205	NM_076363	F15A8.7	-2.05874	0.0360393	0.99353	-0.833739	0.351043	1
A_12_P100206	NM_069288	elo-1	-0.178098	0.19747	1	-0.573954	0.00118971	0.0689532
A_12_P100207	NM_064127	clec-144	-0.0647272	0.851241	1	-0.948896	0.0178398	0.510495
A_12_P100208	NM_073190	R04B5.5	-0.305864	0.090472	1	-1.00133	0.00010355	0.012952
A_12_P100209	NM_076938	dct-1	0.0175819	0.93805	1	-0.710423	0.00897222	0.302344
A_12_P100210	NM_060427	C35E7.7	3.18598	0.000312413	0.0276837	3.67264	0.000100713	0.0127164
A_12_P100211	NM_067593	Y55F3BL.1	0.388704	0.0300079	0.864172	-0.690146	0.00113498	0.066787
A_12_P100212	NM_063072	spon-1	0.0382163	0.801337	1	0.506734	0.00631702	0.233048
A_12_P100213	NM_068865	C50F7.4	-0.0121703	0.919726	1	-0.495991	0.00172342	0.0899356
A_12_P100214	NM_061296	B0432.11	-4.30895	6.87098e-06	0.00251652	1.1912	0.0424988	0.998412
A_12_P100215	NM_064362	cyd-1	-0.0884378	0.66015	1	-1.77671	3.26406e-06	0.00147053
A_12_P100216	NM_061829	B0281.5	0.737044	0.315252	1	-4.653	5.08077e-05	0.00821074
A_12_P100217	NM_074041	srsx-19	1.86416	0.000124504	0.0143092	0.00913758	0.977165	1
A_12_P100218	NM_064376	zyx-1	-0.0683046	0.775935	1	-0.0287862	0.904361	1
A_12_P100219	NM_058532	Y37E3.13	1.15331	7.73344e-05	0.0103293	-0.70068	0.00308378	0.136599
A_12_P100220	NM_076543	sulp-2	-2.17573	8.26957e-08	0.000223777	-2.3107	4.60596e-08	8.90277e-05
A_12_P100221	NM_077252	R07B1.5	-3.62189	0.000102658	0.0124707	1.24396	0.0610745	1
A_12_P100222	NM_001027335	nfi-1	0.023759	0.891384	1	-0.814647	0.000684107	0.0467887
A_12_P100223	NM_058288	F56C11.5	-0.984056	6.78816e-05	0.00949218	-1.04246	4.1748e-05	0.00719407
A_12_P100224	NM_068685	C06G3.6	0.137176	0.537563	1	-0.389473	0.0996043	1
A_12_P100225	NM_059560	rpb-5	0.2413	0.0706161	1	-0.391809	0.00811534	0.28065
A_12_P100226	NM_073897	nasp-2	-0.0821034	0.671682	1	-1.33745	2.94442e-05	0.00570991
A_12_P100227	NM_062952	T19D12.9	0.529487	0.0156271	0.525512	-0.462574	0.0294395	0.753216
A_12_P100228	NM_063482	F46C5.7	-1.07862	0.00946929	0.36101	1.55904	0.000921205	0.0576488
A_12_P100229	NM_071824	Y47D7A.12	-0.678408	0.249309	1	-2.61813	0.000779844	0.0513831
A_12_P100231	NM_068854	flp-13	0.75456	0.0067033	0.277887	1.13237	0.00044487	0.0350585
A_12_P100232	NM_001027194	T24F1.7	0.829341	0.0842633	1	3.10819	2.73755e-05	0.00545806
A_12_P100233	NM_070760	R02C2.1	-1.81661	0.0946143	1	-2.09832	0.0586636	1
A_12_P100234	NM_075202	ZK262.3	1.32016	0.0115411	0.417964	1.55282	0.00459238	0.18359
A_12_P100235	NM_059519	T23B3.6	0.484991	0.00159641	0.0942795	-0.0427514	0.715109	1
A_12_P100237	NM_063368	ubc-24	-2.02021	0.00284091	0.145162	0.583688	0.285339	1
A_12_P100238	NM_171138	zmp-1	-0.285151	0.117435	1	0.123841	0.474412	1
A_12_P100239	NM_074577	F35E8.2	-0.206153	0.382506	1	-0.170435	0.467613	1
A_12_P100240	NM_068615	F15B10.3	-0.626149	0.0255953	0.766697	-0.0026311	0.991457	1
A_12_P100241	NM_059678	inx-14	0.158009	0.378311	1	-0.855782	0.000515152	0.0386783
A_12_P100242	NM_071988	C03A7.12	0.360786	0.179447	1	0.623145	0.0315865	0.794523
A_12_P100243	NM_063896	M28.10	0.0788004	0.726403	1	0.695867	0.00964588	0.319296
A_12_P100244	NM_059017	B0041.5	-0.228528	0.173854	1	-0.285149	0.0975087	1
A_12_P100245	NM_058866	T20F5.7	0.271386	0.0492921	1	-0.358924	0.0142429	0.428867
A_12_P100247	NM_073432	folt-1	-0.791458	0.00181318	0.103902	-0.0714489	0.713747	1
A_12_P100248	NM_072662	Y97E10AR.6	0.162557	0.263935	1	0.0296148	0.833714	1
A_12_P100249	NM_001029061	Y39D8A.1	-0.805888	0.00324185	0.160305	-0.119606	0.582765	1
A_12_P100250	NM_182037	C06A5.8	0.239829	0.275385	1	-0.79368	0.00328655	0.1433
A_12_P100251	NM_171027	ZK1067.8	0.639753	0.00972882	0.368399	-0.423395	0.0616569	1
A_12_P100252	NM_067044	Y47D3A.14	-0.00870505	0.945364	1	-0.715282	0.000166729	0.0178452
A_12_P100253	NM_065472	B0285.1	0.113132	0.646177	1	-0.872235	0.00434372	0.175799
A_12_P100254	NM_068216	T22B11.5	-0.659017	0.0369714	1	-0.0197648	0.944049	1
A_12_P100256	NM_060695	F41D3.7	0.668625	0.0777776	1	0.435591	0.229784	1
A_12_P100257	NM_064026	B0491.7	0.329824	0.0249919	0.753106	-0.274092	0.0535922	1
A_12_P100258	NM_062263	F54D10.9	-2.86457	0.000333848	0.0291745	-0.123146	0.824848	1
A_12_P100259	NM_063626	chitinase	0.170399	0.51329	1	2.04657	8.99444e-06	0.00277017
A_12_P100260	NM_001027768	apb-1	-0.217231	0.130162	1	-0.489551	0.0039099	0.162964
A_12_P100261	NM_074539	T26E4.9	4.25715	2.37163e-07	0.000373722	5.41421	2.30098e-08	5.93977e-05
A_12_P100263	NM_059471		-0.27879	0.13332	1	1.23702	2.51869e-05	0.00519211
A_12_P100264	NM_069830	lpr-2	0.338332	0.118306	1	-0.0548845	0.787553	1
A_12_P100265	NM_068947	nhr-258	1.16346	1.32753e-05	0.00355669	-0.183242	0.247633	1
A_12_P100266	NM_066093	cra-1	-0.0502195	0.832831	1	-0.565181	0.0345857	0.851835
A_12_P100267	NM_078268	F38E9.5	0.390105	0.0472249	1	0.914393	0.000331423	0.028764
A_12_P100268	NM_001029762	set-20	-0.522634	0.0161948	0.539845	-1.37235	1.73904e-05	0.00418366
A_12_P100269	NM_060039	T06D10.2	-0.265901	0.277102	1	-0.551068	0.038183	0.919539
A_12_P100270	NM_069475	ech-8	0.00897982	0.968545	1	0.650886	0.0147688	0.440678
A_12_P100272	NM_068635	spd-3	0.0718885	0.662669	1	-1.08027	4.57828e-05	0.00764753
A_12_P100274			0.0442531	0.794726	1	-0.69976	0.001687	0.0885814
A_12_P100275	NM_070736	cgp-1	0.427331	0.03245	0.915815	-0.426552	0.0327036	0.816445
A_12_P100278	NM_065023	Y22D7AL.7	0.201729	0.103065	1	-0.788557	3.36352e-05	0.0062069
A_12_P100279	NM_073442	K10D6.2	0.473036	0.116351	1	0.626668	0.0458347	1
A_12_P100280	NM_001028309	Y4C6B.7	-0.429006	0.0247238	0.746519	-0.471648	0.015723	0.462674
A_12_P100281	NM_001028138	zen-4	0.932712	0.00073446	0.0521694	-1.62781	7.53562e-06	0.0024645
A_12_P100282	NM_060057	F25H5.3	-0.404999	0.0411295	1	-0.578828	0.00730425	0.259531
A_12_P100283	NM_001136358	let-23	0.444455	0.0165215	0.548305	-0.423158	0.020951	0.577211
A_12_P100284	NM_076620	C15H9.4	0.292104	0.193311	1	-0.692484	0.0077849	0.2721
A_12_P100285	NM_074050	C06B3.7	0.494428	0.393475	1	0.185906	0.744407	1
A_12_P100286	NM_072201	F31F7.2	1.0795	0.00291392	0.147872	0.64194	0.0429174	1
A_12_P100287	NM_070203	seld-1	0.100173	0.532354	1	-0.432168	0.0188423	0.531544
A_12_P100288	NM_074147	F47B8.2	0.337107	0.0602048	1	-0.0478668	0.770179	1
A_12_P100289	NM_059677	inx-14	0.144437	0.421389	1	-0.97898	0.000189855	0.0194451
A_12_P100290	NM_059575	ztf-4	0.105224	0.427382	1	-0.507651	0.00247014	0.116357
A_12_P100292	NM_058801	msh-2	0.368107	0.112908	1	-0.193073	0.383968	1
A_12_P100293	NM_067281	flp-14	0.357069	0.0237155	0.722636	0.836427	9.07349e-05	0.0118555
A_12_P100295	NM_076244	fkh-2	-0.0656922	0.821176	1	-0.092835	0.749718	1
A_12_P100296	NM_065574	col-89	3.38577	8.3836e-05	0.0109033	3.46034	6.99636e-05	0.0100778
A_12_P100298	NM_061745	math-20	0.055847	0.821956	1	0.519663	0.0566807	1
A_12_P100299	NM_066503	fip-1	0.855382	0.201428	1	-0.642984	0.328386	1
A_12_P100300	NM_072657		1.97118	8.61839e-05	0.0110899	0.853655	0.021553	0.589779
A_12_P100301	NM_071551	T20D4.9	0.274305	0.324981	1	-0.966627	0.00436285	0.176409
A_12_P100302	NM_061385	Y39F10C.1	-1.68205	0.0210257	0.661002	0.688244	0.290444	1
A_12_P100303	NM_060698	F41D3.9	2.16418	2.63669e-05	0.00521365	1.10292	0.00418546	0.171141
A_12_P100306	NM_069125		0.0997063	0.743013	1	0.931267	0.0101501	0.331588
A_12_P100307	NM_078194	Y7A5A.2	1.42089	1.16975e-05	0.00332114	0.764136	0.00162274	0.0860434
A_12_P100308	NM_058818	C32E8.3	-0.391216	0.0106637	0.394361	-0.258501	0.0658119	1
A_12_P100310	NM_066869	R01H10.4	-2.7423	0.000212053	0.0210165	-1.81024	0.00399961	0.165595
A_12_P100311	NM_062142	C16C8.5	0.468518	0.028524	0.831313	-0.237272	0.225285	1
A_12_P100312	NM_069046	spp-8	-0.238338	0.275553	1	0.49891	0.0361268	0.881929
A_12_P100313	NM_062844	tat-4	0.512925	0.0811821	1	-0.0823454	0.76232	1
A_12_P100314	NM_061093	fbxb-69	1.01425	0.0170041	0.560624	-1.04764	0.0144603	0.433668
A_12_P100315	NM_171320	M01H9.5	5.04395	0.000416341	0.0341534	6.0524	9.86259e-05	0.0125562
A_12_P100316	NM_063048	ZK1127.10	-0.406801	0.0326229	0.919438	-0.161553	0.349153	1
A_12_P100317	NM_067617	plx-1	0.273442	0.224618	1	-0.743831	0.0054062	0.207282
A_12_P100318	NM_076834	spp-3	-0.332766	0.0886517	1	-0.198607	0.287073	1
A_12_P100319	NM_069713	F54D1.1	-2.80785	0.000330697	0.028996	0.916002	0.114581	1
A_12_P100320	NM_064140	ZK930.4	-3.57373	3.85621e-05	0.00656273	1.44931	0.018678	0.528199
A_12_P100321	NM_060931	vet-6	-0.774403	0.490912	1	-1.08315	0.340701	1
A_12_P100322	NM_066471	F42H10.6	-0.881859	1.79448e-05	0.00423397	-0.282549	0.0361844	0.882898
A_12_P100324	NM_063086	col-36	0.308084	0.143728	1	0.0156566	0.937407	1
A_12_P100327	NM_061196	F11C3.1	-0.00819664	0.970314	1	-1.35582	8.07861e-05	0.011064
A_12_P100329	NM_182305	col-107	1.84285	0.00324677	0.160488	6.72121	5.70668e-08	0.000100411
A_12_P100330	NM_068247	ubxn-6	-0.0527204	0.686842	1	-0.670607	0.000336438	0.0290071
A_12_P100331	NM_058880	ars-2	-0.147232	0.301274	1	-0.389078	0.0161489	0.472657
A_12_P100334	NM_171566	Y39B6A.41	0.199637	0.566159	1	-0.8324	0.0325554	0.813615
A_12_P100335		unc-43	1.16819	0.000368255	0.0313163	0.860382	0.00314486	0.138663
A_12_P100336	NM_067616	F58H7.2	-0.392776	0.0191435	0.614431	-0.0798965	0.584078	1
A_12_P100337	NM_063609	tag-50	-1.04426	0.0100528	0.377086	1.41939	0.00152901	0.082441
A_12_P100338	NM_062227	fbxc-52	0.300283	0.1456	1	-1.03875	0.000261934	0.0243315
A_12_P100339	BJ121353	F36H9.7	1.00195	0.000187792	0.0191638	0.334726	0.0861258	1
A_12_P100340	NM_063977	C09H10.5	0.533809	0.0637802	1	-0.429346	0.124866	1
A_12_P100341	NM_001026125	dyf-3	0.546634	0.00185527	0.105716	-0.80849	9.84292e-05	0.0125482
A_12_P100342	NM_001083253	Y37A1B.17	-0.225158	0.205026	1	-0.42348	0.0286416	0.736694
A_12_P100343	NM_001029787	Y34B4A.4	-0.0250638	0.865332	1	0.412901	0.0164959	0.480679
A_12_P100344	NM_060021	syn-13	-0.283971	0.0738278	1	-0.684646	0.000682044	0.0467046
A_12_P100345	NM_078203	F59F4.2	0.0541726	0.830234	1	0.634495	0.0271894	0.707315
A_12_P100346	NM_001027637	lit-1	-0.192533	0.239143	1	-0.0322145	0.838423	1
A_12_P100347	NM_060219	mom-4	0.0612328	0.789069	1	-0.457577	0.0666963	1
A_12_P100348	NM_062363	pfd-2	0.0937881	0.587654	1	0.231933	0.195737	1
A_12_P100350		F35A5.1	0.596843	0.0292258	0.846331	-0.154141	0.527213	1
A_12_P100351	NM_078213	F31B9.3	-0.0389563	0.864389	1	-1.67085	1.82006e-05	0.0042969
A_12_P100352	NM_073227	ZK856.12	-0.103577	0.638125	1	-1.01265	0.00075155	0.0499812
A_12_P100353	NM_065868	F01F1.11	0.245512	0.164915	1	-0.524915	0.00928478	0.310475
A_12_P100354	NM_060577	T22H2.4	0.0446787	0.789295	1	-0.211592	0.222453	1
A_12_P100355	NM_072266	K04A8.3	-1.5139	0.00106524	0.0691894	-1.18378	0.00529094	0.204033
A_12_P100356	NM_062922	tag-184	0.318605	0.0243377	0.737315	0.128542	0.311309	1
A_12_P100357	NM_066634	ZC84.6	-3.93526	0.000181157	0.0186762	2.7401	0.0025148	0.117848
A_12_P100358	NM_073499		0.168124	0.409402	1	-0.188966	0.355949	1
A_12_P100359	NM_073544	tag-290	1.9115	0.00245084	0.130272	1.48996	0.0107723	0.346856
A_12_P100360	NM_066890	umps-1	1.88058	3.8278e-06	0.00189638	0.994312	0.00076534	0.0506922
A_12_P100361	NM_064682		7.20511	7.22708e-07	0.000751172	7.04429	8.93862e-07	0.00062359
A_12_P100362	NM_073852	inft-2	-0.200237	0.277778	1	-0.847631	0.000631338	0.0443468
A_12_P100363	NM_063836	gpd-1	-0.236115	0.269269	1	-0.748659	0.00394492	0.163994
A_12_P100366	NM_001129642	C28G1.5	0.701156	0.00949348	0.361756	1.2234	0.000224559	0.0218911
A_12_P100367	NM_060784	W02D9.5	-6.57348	0.000285897	0.0259482	0.344787	0.783075	1
A_12_P100369	NM_061383	K07E8.1	-0.164849	0.813676	1	0.911727	0.210058	1
A_12_P100371	NM_060358	F25H2.3	0.225767	0.550452	1	0.358082	0.350056	1
A_12_P100372	NM_001027722	Y48G9A.9	0.451788	0.0157228	0.527742	0.625785	0.00239389	0.113817
A_12_P100373	NM_067434	W06F12.3	-1.67419	0.00153902	0.0915793	1.37408	0.00543527	0.208126
A_12_P100374	NM_075408	Y43F8C.9	-2.17296	0.000296147	0.0266821	1.11116	0.0203641	0.564371
A_12_P100375	NM_061202	ptr-23	3.38525	1.13304e-06	0.000974949	2.64872	1.06887e-05	0.00310175
A_12_P100376			0.289036	0.271994	1	-0.505947	0.0689377	1
A_12_P100377	NM_076901	K09F5.4	1.26502	0.206238	1	-0.434595	0.652558	1
A_12_P100379	NM_058892	C24G7.4	-0.525048	0.0577478	1	-2.189	3.94105e-06	0.00164158
A_12_P100380	NM_067450		-1.16557	0.000163707	0.0173132	-0.181937	0.387403	1
A_12_P100381	NM_001027061	K04B12.2	0.0931683	0.603849	1	-0.273555	0.146428	1
A_12_P100382	NM_063559	sym-2	-2.28467	5.57141e-07	0.000642965	0.174628	0.419915	1
A_12_P100383	NM_067580	gst-40	0.50869	0.0257868	0.771492	0.673093	0.00605447	0.225906
A_12_P100384	NM_059757	nlp-8	0.500335	0.00512148	0.226274	0.484967	0.00615709	0.228648
A_12_P100385	NM_069233	F49C12.11	0.0127037	0.915027	1	-0.026678	0.822874	1
A_12_P100386	NM_062868	C32D5.3	0.0112315	0.95062	1	-0.355243	0.0719276	1
A_12_P100387	NM_060147	K07A1.15	0.421423	0.118236	1	-1.38582	0.000208882	0.0207809
A_12_P100388	NM_070869	F48G7.8	4.81151	3.37848e-06	0.00179897	7.40441	5.66987e-08	0.000100411
A_12_P100389	NM_074179	tag-114	-0.0802302	0.601724	1	-0.605245	0.00218522	0.106592
A_12_P100390	NM_065568	emb-5	-0.115457	0.451901	1	-0.671476	0.00100813	0.0613757
A_12_P100391	NM_077158	F18G5.5	1.97683	0.0588222	1	-1.04296	0.287565	1
A_12_P100392	NM_065238	R10F2.4	1.08217	0.000145075	0.0158916	0.423124	0.0440773	1
A_12_P100393	NM_073454	T19B10.8	-0.276958	0.154651	1	-0.88011	0.000601627	0.0429207
A_12_P100394	NM_067296	ZK1010.4	4.57666	2.14407e-07	0.000357627	2.84604	1.72522e-05	0.00416576
A_12_P100395	NM_072934	R03H4.6	-5.9762	1.70576e-06	0.00122989	1.9247	0.0102117	0.332959
A_12_P100396	NM_001029055	Y38H6C.23	-1.03732	0.000128766	0.0145746	-0.0844329	0.637876	1
A_12_P100397	NM_063237	skr-17	0.389588	0.0148181	0.505895	-0.761554	0.000178528	0.0186607
A_12_P100398	NM_069802	ZK809.3	-0.0406529	0.742387	1	0.19962	0.1276	1
A_12_P100400	NM_069640	Y69E1A.4	-3.70859	2.79785e-06	0.00162397	1.12018	0.0186458	0.527443
A_12_P100402	NM_001083296	psa-3	0.808581	0.0283489	0.82787	1.11419	0.00540312	0.20721
A_12_P100403	NM_064805	F30H5.3	-3.6039	0.000252552	0.0237183	-0.977794	0.167597	1
A_12_P100405	NM_063859	clec-61	-0.116101	0.87828	1	3.44261	0.000853132	0.0546437
A_12_P100406	NM_076348	F14H12.7	-2.25446	0.00333333	0.163858	0.0655233	0.914073	1
A_12_P100407	NM_069628	ZK593.1	-0.293748	0.0651848	1	0.401267	0.0177694	0.509184
A_12_P100408	NM_078464	cTel55X.1	-0.0179389	0.903432	1	0.915641	7.66317e-05	0.0106853
A_12_P100409	NM_060779	W02D9.10	-0.964528	0.000998132	0.065778	-0.31998	0.161084	1
A_12_P100410	NM_064032	C05D12.2	0.87669	0.00605517	0.257471	-1.17643	0.000890268	0.0562692
A_12_P100411	NM_075661	Y73B3A.10	0.647856	0.00170112	0.0989883	-0.389624	0.0291153	0.74643
A_12_P100412	NM_001083298	dyf-6	0.618429	0.0250325	0.753866	-0.565626	0.0368576	0.895592
A_12_P100413	NM_065859	ddx-23	-0.0271176	0.84359	1	-0.584347	0.00135394	0.0755908
A_12_P100414	NM_059363	T27A3.7	0.0185052	0.92164	1	-0.869412	0.000753495	0.0500767
A_12_P100415		tag-332	0.910935	0.00450003	0.205745	-0.316999	0.235149	1
A_12_P100416	NM_001047720	fbxa-116	-0.489716	0.0529999	1	0.0459268	0.841451	1
A_12_P100417	NM_062370	B0286.3	-0.19463	0.6034	1	0.927207	0.0282711	0.729508
A_12_P100418	NM_075412	Y43F8C.13	-0.174932	0.297815	1	0.209009	0.218658	1
A_12_P100419	NM_059185	frm-4	0.0476699	0.764211	1	-0.258528	0.125102	1
A_12_P100420	NM_001136327	nhr-62	-1.34573	6.7993e-06	0.00250505	-0.386887	0.0360722	0.880816
A_12_P100421	NM_060185	ceh-5	2.33272	4.32128e-05	0.00707369	3.22749	2.40746e-06	0.00120029
A_12_P100422	NM_073813	C44H9.6	-0.074224	0.752052	1	0.286104	0.238816	1
A_12_P100423	NM_073639	C13C4.4	-0.184031	0.175578	1	-0.12596	0.342155	1
A_12_P100424	NM_073063	his-41	-0.0801467	0.622157	1	-0.180609	0.278326	1
A_12_P100425	NM_058350	ptr-21	1.43249	0.0005421	0.0415286	1.20223	0.00187426	0.0951744
A_12_P100426	NM_077600	T08D10.3	0.38229	0.34083	1	-1.53878	0.00233703	0.111842
A_12_P100427	NM_072968	B0222.1	0.559366	0.00266545	0.138432	0.537799	0.00342465	0.147762
A_12_P100428	NM_077609	W06B3.1	-0.243717	0.335993	1	-0.347246	0.180232	1
A_12_P100429	NM_078190	ZK678.3	0.780609	0.00391678	0.185364	-0.26251	0.240209	1
A_12_P100430	NM_065781	D1044.2	1.13208	0.00053808	0.0412846	0.757617	0.00756121	0.266251
A_12_P100432	NM_077096	C28G1.2	-0.167643	0.696341	1	-1.01152	0.0354642	0.868915
A_12_P100435	NM_068504	C46G7.1	0.0470492	0.766002	1	0.590535	0.00316716	0.139372
A_12_P100436	NM_068820	cdd-2	-0.116433	0.361898	1	-0.0261442	0.834514	1
A_12_P100438	NM_061049	clec-113	0.583787	0.43436	1	-0.516629	0.487602	1
A_12_P100439	NM_059515	C17F3.1	-3.88348	0.000302738	0.0271079	0.681864	0.369285	1
A_12_P100440	NM_061342	W07E6.5	0.44017	0.00626589	0.264221	-0.642357	0.000502749	0.0380382
A_12_P100441	NM_066353	K12H4.5	0.0924861	0.424134	1	-0.0899785	0.436414	1
A_12_P100442	NM_001128944	C01H6.8	-1.12213	7.08023e-05	0.0097357	-1.25482	2.74061e-05	0.00546138
A_12_P100443	NM_067591	F56B3.11	-0.104721	0.643526	1	-0.310326	0.187422	1
A_12_P100444	NM_072976	B0222.9	-1.35541	0.00029721	0.0267533	-0.33493	0.214055	1
A_12_P100446	NM_067029	Y48A6C.1	0.187726	0.21412	1	-0.73158	0.000397355	0.0323933
A_12_P100447	NM_069883	K08E4.2	0.661757	0.00344694	0.168116	-1.44239	7.91856e-06	0.00253223
A_12_P100448	NM_171572	tgt-2	0.238803	0.0792864	1	-0.146241	0.259627	1
A_12_P100449	NM_067420	aqp-11	0.239878	0.0745618	1	0.262187	0.05459	1
A_12_P100450	NM_062301	K10G6.4	1.22766	0.00293742	0.148795	-0.415278	0.217876	1
A_12_P100451	NM_063695	Y53C12A.6	0.273641	0.288202	1	-1.27662	0.000361677	0.0304339
A_12_P100452	NM_075124	Y59A8B.6	-0.0089042	0.939686	1	0.0609247	0.607041	1
A_12_P100453	NM_182208	T19D12.4	-0.0397404	0.865935	1	-0.344637	0.163551	1
A_12_P100454	NM_065787	F09F7.5	0.274944	0.106681	1	1.49877	1.90404e-06	0.00102748
A_12_P100455	NM_063227	B0228.1	0.398535	0.142417	1	-1.06788	0.00159263	0.084987
A_12_P100457	NM_066396	C30A5.4	-3.39802	2.8574e-05	0.00549863	1.3197	0.0194437	0.544478
A_12_P100458	NM_069634	lgg-2	0.683373	0.000445509	0.0359315	-0.0151552	0.912388	1
A_12_P100460			-6.4581	0.000145549	0.0159304	0.536627	0.636048	1
A_12_P100461	NM_066484	acdh-6	0.135897	0.708403	1	2.48063	3.27296e-05	0.00609216
A_12_P100463	NM_001026350	F59A3.5	0.176934	0.180678	1	0.347769	0.0176989	0.507796
A_12_P100464	NM_001028830	F59A7.5	0.328275	0.0499867	1	0.403443	0.0207962	0.573794
A_12_P100465	NM_067009	col-94	0.878464	0.00670071	0.27781	0.33678	0.222356	1
A_12_P100466	NM_072754	F38E1.9	0.087171	0.587935	1	0.135476	0.404598	1
A_12_P100467	NM_076917	adm-4	0.0366429	0.82797	1	-0.492296	0.0131714	0.403662
A_12_P100468	NM_067375	F45G2.9	0.319986	0.0975825	1	-0.775367	0.00123529	0.0708
A_12_P100469	NM_063949	F44F4.10	-2.78934	2.98009e-05	0.00563646	1.22553	0.010654	0.343838
A_12_P100471	NM_068601	C43G2.3	-1.10806	0.0909129	1	0.847074	0.183446	1
A_12_P100472	NM_001028817	fipr-13	1.65439	0.00901991	0.34749	-0.990543	0.0825065	1
A_12_P100473	NM_060655	Y47H10A.5	0.681377	0.115671	1	1.24334	0.0103106	0.335458
A_12_P100474	NM_064829		-0.350182	0.141156	1	-0.893141	0.00216574	0.105985
A_12_P100475	NM_062755	tbc-2	-0.437399	0.0109779	0.40298	-0.569352	0.00228088	0.110108
A_12_P100476	NM_068426	T12E12.3	-0.25469	0.252664	1	-0.685792	0.00829194	0.285099
A_12_P100478	NM_058513	Y71G12A.4	-1.12849	0.0210492	0.661422	1.15536	0.0188136	0.530887
A_12_P100479	NM_066307	snr-5	0.235625	0.159441	1	-0.55249	0.00503452	0.196696
A_12_P100480	NM_063584	tag-175	-0.0547101	0.647548	1	-0.41708	0.00477187	0.189204
A_12_P100481	NM_074060	R10D12.6	0.976857	0.0832302	1	1.86997	0.00413967	0.169924
A_12_P100482	NM_065724	ZC395.4	-4.45873	1.4209e-05	0.00371602	1.06511	0.0941178	1
A_12_P100483	NM_065393	F37A8.2	-3.88129	3.05137e-05	0.0057014	1.34343	0.0338179	0.837103
A_12_P100485	NM_061091	pes-7	0.0975322	0.531806	1	1.04244	3.71864e-05	0.00666256
A_12_P100486	NM_001027812	ZK1098.2	0.0530195	0.66963	1	-0.633577	0.000350332	0.0298505
A_12_P100487	NM_077489	F08G12.5	0.420378	0.111641	1	-0.601146	0.0315568	0.794029
A_12_P100490	NM_072383	F20A1.2	0.454282	0.131627	1	-1.2462	0.00109407	0.0650334
A_12_P100491		K06B9.2	0.0302341	0.86059	1	-0.959313	0.000180284	0.0187786
A_12_P100492	NM_001026802	rab-3	0.459795	0.0370228	1	0.462184	0.0362372	0.88372
A_12_P100493	NM_071535	C04E12.4	-0.184457	0.446136	1	-1.66323	2.81354e-05	0.00553364
A_12_P100494	NM_067713	nhr-274	0.60619	0.0106616	0.394322	-0.0737787	0.712091	1
A_12_P100495	NM_066125	F31E3.6	0.776024	0.00547767	0.238917	-0.165466	0.471267	1
A_12_P100496	NM_063126	F45E12.5	0.0919745	0.534202	1	0.129558	0.385725	1
A_12_P100498	NM_076785	cah-5	0.0966215	0.478666	1	0.403057	0.0116284	0.367871
A_12_P100499	NM_063311	emb-27	-0.0792288	0.663835	1	-0.641648	0.00450842	0.181119
A_12_P100500	NM_069521	R10H10.6	0.0903405	0.508256	1	0.110475	0.421029	1
A_12_P100501	NM_060138		0.225155	0.163015	1	-1.01548	4.40473e-05	0.00743358
A_12_P100503	NM_063664	E02H1.6	0.274645	0.043478	1	-0.280697	0.0398496	0.950112
A_12_P100504	NM_067529	tag-313	0.148059	0.248035	1	-0.177083	0.17295	1
A_12_P100505	NM_001047645	srx-125	-0.14518	0.704077	1	-0.0787303	0.836391	1
A_12_P100506	NM_059096	F54C1.8	-3.05391	0.000145258	0.0159072	0.686765	0.215589	1
A_12_P100507	NM_073058	C50F4.4	0.169358	0.269165	1	-0.779017	0.0002918	0.0261464
A_12_P100508	NM_058521	Y37E3.1	0.111721	0.469565	1	-0.837562	0.000202778	0.0204066
A_12_P100509	NM_066993	C44B9.1	0.271316	0.17857	1	-0.238679	0.231997	1
A_12_P100510	NM_069894	01/02/11	-0.607431	0.0110562	0.405072	-0.75161	0.0031907	0.140181
A_12_P100511	NM_066327	gsto-1	-1.29039	0.00069739	0.0501629	-0.394086	0.173805	1
A_12_P100512	NM_001029718	gcy-31	-0.135311	0.491714	1	0.0657364	0.736018	1
A_12_P100513	NM_064181	Y57A10A.2	0.342222	0.0643083	1	-0.52021	0.0100479	0.32926
A_12_P100514	NM_062067	gcy-15	1.00516	0.000300107	0.0269461	0.765243	0.00213492	0.104875
A_12_P100516	NM_075631	F31D4.8	-0.477971	0.00603614	0.256991	-0.542363	0.00277723	0.126212
A_12_P100517	NM_073256	arx-2	-0.0453959	0.719764	1	-0.0551314	0.663532	1
A_12_P100518	NM_067502	dsc-4	-0.0450959	0.792957	1	1.23466	2.13304e-05	0.00466267
A_12_P100519	NM_068748	D2024.2	-0.12911	0.395272	1	-1.12392	1.42277e-05	0.00371924
A_12_P100520	NM_076068	T03G6.1	-7.6907	2.41413e-07	0.000377389	4.73156	2.11149e-05	0.00464405
A_12_P100521	NM_061625	fbxb-15	0.399277	0.56338	1	-3.82604	0.000178318	0.018653
A_12_P100522	NM_065596	F26A1.8	-0.0104161	0.968698	1	-0.636547	0.0333819	0.829003
A_12_P100523	NM_001029482	sto-5	0.0378484	0.831233	1	-0.265853	0.154994	1
A_12_P100526	NM_076686	opt-2	0.00363126	0.979666	1	0.0772984	0.590192	1
A_12_P100527	NM_062381	ZK430.1	0.423959	0.0223997	0.694295	-0.19384	0.246611	1
A_12_P100528	NM_067483	dehydrogenase	-0.695038	0.00489561	0.218684	-0.790119	0.0021798	0.106381
A_12_P100529	NM_063145	F43E2.1	0.402346	0.0113731	0.413602	-0.659717	0.000468977	0.0363092
A_12_P100530	NM_069362	nspd-2	-5.70213	0.000322431	0.0283982	0.137496	0.900677	1
A_12_P100533	NM_073405	hot-6	0.623398	0.000408876	0.0336859	0.0484386	0.697635	1
A_12_P100534	NM_171642	cgef-1	0.283548	0.116286	1	-0.673949	0.00212872	0.104695
A_12_P100535	NM_063515	ooc-5	0.05889	0.689612	1	-0.611789	0.00156761	0.0839488
A_12_P100536	NM_071379	folt-2	0.0718185	0.74096	1	1.02761	0.000624085	0.0440496
A_12_P100537	NM_059858	F52B5.2	0.027211	0.831236	1	-0.859267	3.77787e-05	0.00672265
A_12_P100538	NM_066819	fbxa-155	-1.98331	0.000164884	0.0173915	1.28425	0.00370376	0.156394
A_12_P100540	NM_058603	fbp-1	-0.433073	0.0199353	0.633675	-0.631975	0.00233864	0.111884
A_12_P100542	NM_066282	ZK112.4	0.823078	0.056742	1	-0.136138	0.729624	1
A_12_P100544	NM_171225	T20G5.13	0.667341	0.273549	1	0.017232	0.976737	1
A_12_P100545	NM_071647	peroxidase	-0.0644387	0.876955	1	-0.629507	0.151361	1
A_12_P100546	NM_073632	nhr-206	0.190849	0.375521	1	0.0419572	0.842582	1
A_12_P100547	NM_062077	ZC239.2	-0.197616	0.726316	1	-0.174599	0.756961	1
A_12_P100548	NM_078293	F22H10.2	-0.879971	0.0780479	1	0.0957548	0.835423	1
A_12_P100549			0.832177	0.0358546	0.989203	0.351826	0.330637	1
A_12_P100550	NM_181959	F23H11.4	0.710293	0.00210966	0.116882	-0.767076	0.00125098	0.0714906
A_12_P100551	NM_065651	C27F2.5	0.208673	0.164441	1	-0.579468	0.00186885	0.0950105
A_12_P100553	NM_171455	K11D12.12	0.463038	0.0107428	0.396725	-0.486333	0.00821269	0.283268
A_12_P100555	NM_059131	Y110A7A.4	-0.137504	0.599616	1	-0.699895	0.0198714	0.553886
A_12_P100556	NM_067677	jtr-1	-0.273378	0.0510374	1	-0.516065	0.00183125	0.0936817
A_12_P100557	NM_074492	C55A1.6	-0.00209417	0.994601	1	-1.36489	0.00105605	0.0634074
A_12_P100558	NM_070894	H25P19.1	0.224619	0.237134	1	-1.31698	2.16649e-05	0.00471932
A_12_P100559	NM_060392	C34B2.4	-2.9703	6.54393e-05	0.00928308	1.11747	0.0347605	0.855549
A_12_P100560			-0.0108276	0.933687	1	-0.670888	0.000332892	0.0288405
A_12_P100561	NM_067763	C23H5.8	-0.0912939	0.518888	1	0.292222	0.0576501	1
A_12_P100562	NM_059920	daf-8	0.532713	0.0420212	1	0.354283	0.15267	1
A_12_P100563	NM_068563	lsm-8	0.155129	0.259692	1	-0.540936	0.00186259	0.0947626
A_12_P100564	NM_075135	fbxa-107	0.480017	0.0299816	0.863606	-0.332848	0.110575	1
A_12_P100566	NM_065510	ins-17	0.325809	0.120486	1	0.577656	0.0129806	0.399601
A_12_P100567	NM_060534	K08C9.2	-2.99599	1.5162e-05	0.00383572	1.06931	0.0205721	0.56881
A_12_P100569	NM_067996	taf-6.2	0.580163	0.0248785	0.75028	-0.394571	0.10362	1
A_12_P100570	NM_073997	fbxa-181	-0.612285	0.311719	1	-3.75705	6.04997e-05	0.0091761
A_12_P100571	NM_001129004	F43G9.2	-0.355141	0.0378094	1	-0.61177	0.00202841	0.101092
A_12_P100572	NM_171538	lig-1	0.688161	0.00356739	0.172596	-0.961867	0.000343728	0.0294327
A_12_P100573	NM_062861	C29F5.3	-1.4873	0.000892421	0.0604252	0.998379	0.0108837	0.349695
A_12_P100574	NM_064982	fbxa-15	0.268435	0.274464	1	0.680359	0.0148186	0.441819
A_12_P100575	NM_062982	F41G3.2	-2.35801	0.00041256	0.0339012	2.24746	0.000591018	0.042395
A_12_P100576	NM_061265	K10B4.4	0.679131	0.004281	0.198038	0.681286	0.00419873	0.171594
A_12_P100577	NM_068509	kcc-2	-0.12177	0.662293	1	0.0545273	0.844349	1
A_12_P100578	NM_001026153	C10G6.1	-0.638672	0.00254266	0.133952	0.324084	0.0710713	1
A_12_P100579	NM_060396	C34B2.10	-0.145482	0.236043	1	0.0876541	0.465244	1
A_12_P100580	NM_060328	Y106G6H.4	0.132771	0.538166	1	0.44233	0.0592796	1
A_12_P100582	NM_171248	K11H12.8	-0.465142	0.0315601	0.897024	-0.0867867	0.651968	1
A_12_P100583	NM_073736	T28H10.3	1.1037	0.00821074	0.32439	2.47988	2.20639e-05	0.00476725
A_12_P100585	NM_059234	M01E11.1	-0.325145	0.0370167	1	-0.40592	0.0132207	0.404796
A_12_P100586	NM_062348	C16A11.7	-4.12785	5.67423e-05	0.00840795	0.432445	0.505923	1
A_12_P100587	NM_001047439	B0513.9	1.56326	0.00471998	0.21303	0.495025	0.280708	1
A_12_P100588	NM_074528	F57A10.4	0.732176	0.00206876	0.115172	-0.877773	0.000578124	0.0417309
A_12_P100589	NM_062384	nhr-16	0.103342	0.5562	1	0.479904	0.0176669	0.507209
A_12_P100591	NM_059194	dpy-5	0.292169	0.261087	1	3.31449	7.79701e-08	0.000127213
A_12_P100592	NM_066604	cls-2	-0.110977	0.65379	1	-0.208867	0.404576	1
A_12_P100593	NM_059474	C55B7.11	0.271944	0.233261	1	-0.651887	0.0122478	0.382196
A_12_P100594	NM_068630	Y73B6A.2	-1.87414	0.006206	0.262316	1.67736	0.0114968	0.364589
A_12_P100595	NM_060115	acetylglucosaminyltransferase	1.23682	0.00597358	0.255103	-0.345524	0.356434	1
A_12_P100596	NM_059309	stam-1	-0.214834	0.234577	1	-0.554757	0.00832736	0.285966
A_12_P100598	NM_059308	tyr-4	-0.150002	0.577585	1	0.177606	0.510965	1
A_12_P100599	NM_001028000	itr-1	-0.0465264	0.817205	1	0.29	0.169502	1
A_12_P100600	NM_073866	B0365.1	-1.08592	0.00052386	0.0405823	-0.935158	0.00152591	0.0823366
A_12_P100601	NM_070958	sqv-6	0.418525	0.0331961	0.93118	-0.666037	0.00277801	0.126233
A_12_P100602	NM_058709	K09H9.7	0.0479237	0.80041	1	-0.950542	0.000406897	0.0329664
A_12_P100603	NM_067461	transposase	-3.9425	8.58689e-06	0.00282421	-0.501114	0.322667	1
A_12_P100604	NM_068623	C01B10.8	0.0930087	0.561595	1	-0.162751	0.317995	1
A_12_P100605	NM_059435	K04F10.2	0.315226	0.140389	1	-0.232281	0.265555	1
A_12_P100606	NM_001026389	ptr-12	1.27862	0.00196731	0.11067	1.77369	0.000177505	0.0186126
A_12_P100607	NM_072157	rpt-2	-0.227994	0.0974103	1	-0.51789	0.00191307	0.096534
A_12_P100608	NM_066507	F22B7.9	1.15745	0.039067	1	-0.885418	0.0997926	1
A_12_P100609	NM_065128	fbxa-9	-1.19982	0.00363047	0.175022	-0.894671	0.018482	0.523677
A_12_P100612	NM_065962	T12A2.1	-0.0431872	0.865143	1	-0.857085	0.00598434	0.224099
A_12_P100613	NM_066988	fbxb-85	1.12276	0.000423679	0.0345918	-0.562674	0.027695	0.717613
A_12_P100614	NM_070966	C02E11.1	-0.332107	0.0943741	1	0.33535	0.0916131	1
A_12_P100615	NM_077020	tbc-18	0.650039	0.00053422	0.0410929	0.60372	0.000916298	0.0574333
A_12_P100616	NM_072788	ZK994.6	0.791157	0.000473	0.0376687	0.0919404	0.570399	1
A_12_P100617	NM_064447		0.00977573	0.952446	1	-0.462072	0.015832	0.465255
A_12_P100618	NM_065783	D1044.6	0.0230298	0.947958	1	-1.11669	0.00859675	0.292859
A_12_P100620	NM_072601	T05B11.4	0.383201	0.183398	1	-1.493	0.00022388	0.0218356
A_12_P100621	NM_068234	Y17G9B.8	0.0860404	0.538968	1	-0.532728	0.00268883	0.123569
A_12_P100622	NM_067149		0.271606	0.50274	1	-0.687265	0.108677	1
A_12_P100623	NM_069716	nhr-7	2.02401	0.000793251	0.0553731	0.772212	0.102368	1
A_12_P100624	NM_058946	Y47D9A.5	-3.17035	3.1015e-05	0.00575706	1.16878	0.0258941	0.681232
A_12_P100625	NM_067694	tag-244	0.199004	0.446397	1	0.418791	0.125947	1
A_12_P100627	NM_001028779	clec-28	1.05082	0.0125587	0.445906	0.728582	0.0619601	1
A_12_P100628	NM_062990	F31E8.4	-0.608144	0.00130552	0.0809304	-1.17609	6.19705e-06	0.00215564
A_12_P100629	NM_001026961	F32A11.7	-2.91008	0.0113583	0.413242	-1.11954	0.262727	1
A_12_P100630	NM_060822	T06G6.4	1.16598	5.88885e-06	0.0023156	-1.21707	3.98799e-06	0.00165411
A_12_P100631	NM_062676	C17C3.1	-0.604002	0.243362	1	-0.37897	0.454844	1
A_12_P100632			0.280491	0.249302	1	-0.798823	0.00575687	0.217302
A_12_P100633		dpy-30	-0.305792	0.639574	1	-1.15091	0.0987837	1
A_12_P100634	NM_001047178	C43E11.12	-0.0182782	0.897839	1	-0.38907	0.0184059	0.521898
A_12_P100636	NM_076966	hlh-8	-0.0218734	0.866734	1	-0.397016	0.0105638	0.341742
A_12_P100637	NM_075876	D1005.2	-2.36201	4.31363e-07	0.000544231	-2.70365	1.18153e-07	0.000168916
A_12_P100638	NM_171294	Y94H6A.5	0.391817	0.0438769	1	0.0571759	0.744098	1
A_12_P100639	NM_067699	Y41D4B.16	-0.483403	0.145834	1	1.48711	0.000640304	0.0447922
A_12_P100640	NM_059545	C37A2.8	0.362643	0.0348044	0.966754	-0.551962	0.0039488	0.16408
A_12_P100641	NM_171716	inx-1	0.503474	0.0235228	0.718492	0.337867	0.103961	1
A_12_P100642	NM_074909	F49H6.8	0.286993	0.243928	1	-1.04178	0.00110688	0.0655074
A_12_P100643			0.366401	0.202996	1	0.723621	0.0224616	0.609615
A_12_P100644	NM_063834	ztf-27	0.190668	0.238014	1	0.372522	0.0338844	0.838334
A_12_P100645	NM_073179	F57A8.1	0.766262	0.00211442	0.117009	-0.128647	0.508278	1
A_12_P100646	NM_060766	T27F6.4	0.350324	0.166156	1	-0.944797	0.0023368	0.111842
A_12_P100647	NM_070901	srbc-39	0.0741733	0.924125	1	0.180925	0.816505	1
A_12_P100649	NM_060034	W06D4.3	0.0698116	0.85198	1	1.01827	0.0187372	0.529341
A_12_P100650	NM_078364	C08A9.6	-0.0429119	0.801218	1	-1.04993	7.92481e-05	0.0109384
A_12_P100652	NM_066530	sma-2	-0.0794027	0.596855	1	0.271525	0.090902	1
A_12_P100653	NM_062409	F35D11.5	0.0559055	0.716634	1	-0.0663619	0.667006	1
A_12_P100654	NM_070440	Y73F8A.5	0.792244	0.00527277	0.231525	0.22795	0.333091	1
A_12_P100655	NM_070983	W07B8.1	-1.01099	3.46549e-05	0.0061417	-0.525141	0.00452187	0.18153
A_12_P100656	NM_063544	T24H10.4	-0.187271	0.278854	1	-1.16312	2.95909e-05	0.00572522
A_12_P100657	NM_067556	col-102	3.95956	0.0353336	0.978408	0.0663172	0.968391	1
A_12_P100658	NM_074470	fbxa-95	0.477437	0.0301921	0.867885	-0.66573	0.00548508	0.209563
A_12_P100660	NM_061424	F28A10.2	-2.04084	0.00107815	0.0697898	0.494401	0.300137	1
A_12_P100661	NM_058475	Y71G12B.18	-6.40619	0.000151089	0.0163676	-0.370071	0.742574	1
A_12_P100663	NM_065241	R10F2.6	-1.24617	0.00288436	0.146837	0.808085	0.0297343	0.758862
A_12_P100664	NM_071201	nhr-133	0.545805	0.00409749	0.191353	0.595082	0.00236678	0.112812
A_12_P100665	NM_060452	spe-38	-3.17359	4.39153e-06	0.00204162	0.858255	0.0380466	0.917201
A_12_P100666	NM_067941	C04C3.6	0.821019	0.00512679	0.226432	-0.743906	0.00903248	0.30385
A_12_P100667	NM_059272	che-14	-3.51055	3.38908e-07	0.000471654	-0.793152	0.0253141	0.668852
A_12_P100668	NM_064824	T19C3.7	1.13652	0.0466381	1	-0.0419964	0.934976	1
A_12_P100671	NM_171291	mdf-2	0.551062	0.0325	0.91683	-1.10269	0.000546533	0.0401876
A_12_P100674	NM_078329	F39F10.3	-2.35518	0.00377229	0.180474	-1.30822	0.0644641	1
A_12_P100675	NM_171108	kbp-2	-0.0583064	0.781987	1	-0.828383	0.00228016	0.110087
A_12_P100677	NM_075966	gei-12	0.171235	0.390773	1	-1.79978	2.36778e-06	0.00118654
A_12_P100678	NM_065356	F34D10.3	0.232678	0.191717	1	0.288382	0.113184	1
A_12_P100679	NM_063364	F49E12.8	-0.554692	0.0464684	1	1.90433	1.34249e-05	0.00358536
A_12_P100680	NM_073786		-0.063337	0.711979	1	-1.14283	4.03935e-05	0.00702855
A_12_P100681	NM_074665	fbxa-18	-0.097743	0.820089	1	0.451771	0.305589	1
A_12_P100682	NM_076924	C54D2.2	0.512258	0.0113331	0.412623	1.03556	8.9359e-05	0.0117422
A_12_P100683	NM_072008	B0238.12	-0.951593	0.0244916	0.740985	-0.472524	0.219148	1
A_12_P100684			-1.73074	0.00302272	0.152135	0.605034	0.205873	1
A_12_P100686		ND5	-0.163802	0.477509	1	-0.65614	0.0141542	0.42662
A_12_P100687	NM_171874	hot-4	0.992241	7.8389e-05	0.0104335	0.169219	0.305125	1
A_12_P100688	NM_062257	F54D10.3	-0.447916	0.0186153	0.600723	-0.181145	0.284162	1
A_12_P100689	NM_001027559	R151.4	0.875649	1.60437e-05	0.0039617	0.189106	0.130224	1
A_12_P100691	NM_001029088	slo-1	0.217548	0.279419	1	0.195183	0.329101	1
A_12_P100692	NM_076782	tsp-16	-2.10837	2.13913e-05	0.00461684	-2.15155	1.79167e-05	0.00426474
A_12_P100693	NM_058526	Y37E3.8	-0.166958	0.363052	1	-0.0407038	0.821032	1
A_12_P100696	NM_001136324	W09G3.6	-0.0999507	0.451108	1	-0.430661	0.00685787	0.247435
A_12_P100697	NM_075818	R193.3	0.053239	0.879927	1	0.653046	0.0860507	1
A_12_P100698	NM_072910	gck-1	0.30821	0.195673	1	-0.360756	0.135527	1
A_12_P100700	NM_066449	ZK353.4	-3.07398	0.000141803	0.0156336	0.864971	0.127915	1
A_12_P100701	NM_071489	srj-7	0.547458	0.576502	1	-0.109211	0.910609	1
A_12_P100703	NM_063380	F22B5.4	-0.248749	0.26431	1	0.374875	0.104801	1
A_12_P100704	NM_001129650	pkc-2	0.633568	0.00254936	0.134197	0.193079	0.253792	1
A_12_P100705	NM_069098	F21D5.9	-0.908369	0.0157449	0.528296	-0.257684	0.43073	1
A_12_P100709	NM_073186	R04B5.1	-3.94681	5.42115e-06	0.00224854	1.00755	0.0522264	1
A_12_P100711	NM_078386	T08G2.2	-2.57603	0.000742982	0.0525465	0.0498838	0.928548	1
A_12_P100712	NM_065572	twk-6	-2.58928	5.09272e-06	0.00216966	0.708014	0.0388707	0.932662
A_12_P100713			1.21845	0.207398	1	-0.0932615	0.91993	1
A_12_P100714	NM_064295	Y38E10A.13	-0.469334	0.256659	1	-0.641009	0.131194	1
A_12_P100715	NM_078116	C11G10.1	1.93635	8.42358e-05	0.0109327	2.92148	2.25606e-06	0.00115413
A_12_P100716	NM_071364	T03D3.5	0.277357	0.168695	1	-0.950135	0.000452598	0.0354176
A_12_P100717	NM_062244	T24E12.9	1.53004	8.06809e-05	0.0106232	-1.48052	0.000105786	0.0131478
A_12_P100718	NM_074695	F21H7.3	-0.270491	0.435416	1	-3.42178	1.06013e-06	0.000700282
A_12_P100720	NM_065694	ulp-1	0.0550466	0.719825	1	-0.54228	0.00444459	0.178917
A_12_P100721	NM_068735	C42D4.1	-0.143475	0.53763	1	0.391403	0.111882	1
A_12_P100722	NM_068195	F19C7.4	-0.192982	0.407253	1	0.306918	0.198675	1
A_12_P100723	NM_062882	clec-88	0.390022	0.0856239	1	-1.54791	1.73677e-05	0.00418077
A_12_P100724	NM_066893	M03C11.1	0.336309	0.0405505	1	0.00163681	0.991116	1
A_12_P100725	NM_073557	ceh-32	0.510205	0.0127227	0.450832	-0.103704	0.553342	1
A_12_P100727	NM_001029303	C46E1.3	0.687598	0.00389009	0.184517	-0.147846	0.442879	1
A_12_P100728	NM_075424	W04E12.2	1.18651	0.00510338	0.225652	-3.43523	1.05027e-06	0.000696868
A_12_P100729	NM_001027954	F09E8.8	0.600216	0.0109738	0.402866	-0.275534	0.184393	1
A_12_P100730	NM_059776	R11A5.7	2.14027	0.00102608	0.0672471	4.50615	2.07986e-06	0.00109542
A_12_P100731	NM_065102	Y48G9A.6	0.18087	0.357327	1	-0.310969	0.127822	1
A_12_P100732	NM_065862	alh-9	-0.906105	0.000177824	0.0184392	-1.65227	9.09508e-07	0.000629397
A_12_P100733	NM_070086	K10D11.2	-1.27781	0.00105944	0.068847	-1.03529	0.00425015	0.173047
A_12_P100734			-0.972064	0.261105	1	-1.67913	0.0663852	1
A_12_P100738	NM_068966	B0218.5	-2.54167	6.27195e-05	0.00903435	0.866709	0.050406	1
A_12_P100739	NM_070240	fbxa-215	0.403291	0.117556	1	-1.73174	2.22709e-05	0.00479207
A_12_P100740	NM_073884	F57B1.5	1.19028	0.000200677	0.0201444	1.0875	0.000404267	0.0328551
A_12_P100741	NM_078239	R11.4	0.124243	0.752366	1	-4.13048	6.73899e-07	0.000519492
A_12_P100742	NM_061053	gpdh-1	2.35515	0.000856862	0.0587535	2.37144	0.000815373	0.0529328
A_12_P100743	NM_066055	F20H11.6	1.35161	0.00264057	0.137687	0.233556	0.510396	1
A_12_P100745	NM_073688	R04F11.5	0.0805381	0.596188	1	-0.658523	0.00113694	0.0668925
A_12_P100746	NM_066991	oxi-1	-0.135609	0.413881	1	0.00635093	0.968949	1
A_12_P100748			-2.81877	8.70501e-05	0.0111549	1.79312	0.00251485	0.117848
A_12_P100749	NM_067751	Y76B12C.3	0.00688798	0.955371	1	0.43399	0.00459112	0.183577
A_12_P100750	NM_069976	C25G4.3	0.0835541	0.68979	1	-0.207577	0.331172	1
A_12_P100752	NM_061940	T05A8.2	-0.417913	0.603662	1	-0.606611	0.454488	1
A_12_P100753	NM_062984	F41G3.1	0.338965	0.0318958	0.903684	0.40848	0.013217	0.404716
A_12_P100754	NM_182057	F32B5.6	0.569811	0.152462	1	0.292482	0.445422	1
A_12_P100755	NM_076014	crn-4	1.53931	0.000161451	0.0171627	-0.993306	0.003723	0.157023
A_12_P100756			-0.0975515	0.839743	1	0.63465	0.206332	1
A_12_P100757		Y53F4B.21	0.613557	0.0197002	0.628088	-0.476414	0.0570185	1
A_12_P100758	NM_070870	F48G7.9	-0.193717	0.638861	1	0.373013	0.373236	1
A_12_P100759	NM_065434	C16C10.2	0.180207	0.317142	1	-0.122958	0.48905	1
A_12_P100760	NM_069347	pis-1	-0.0824839	0.593744	1	-0.515067	0.00617073	0.228981
A_12_P100761	NM_061400	C08G5.3	-0.980061	0.126216	1	0.846518	0.18028	1
A_12_P100762	NM_059387	T05E7.1	0.11316	0.684248	1	-0.513965	0.0859266	1
A_12_P100763	NM_059810	cdc-48.3	0.445	0.0107613	0.397097	-0.51862	0.00448432	0.180336
A_12_P100764	NM_061325	C24H12.5	0.0198665	0.907791	1	-1.20857	2.56221e-05	0.00524737
A_12_P100765	NM_068534	C49A9.4	-0.474466	0.0207913	0.655208	0.204107	0.266691	1
A_12_P100767	NM_001029239	C16H3.3	-0.224687	0.288274	1	-0.100542	0.626798	1
A_12_P100768	NM_072366	nhr-139	0.503257	0.0121813	0.43586	0.229207	0.195625	1
A_12_P100769	NM_077213	glb-17	-0.553698	0.0679073	1	0.158497	0.571625	1
A_12_P100771	NM_181934	ZK688.5	-0.162119	0.391042	1	-0.706504	0.00283616	0.128221
A_12_P100772	NM_058809	T12F5.1	0.00905259	0.952813	1	-0.978592	5.86018e-05	0.00901014
A_12_P100773	NM_069791	lys-4	-0.420967	0.015473	0.521895	0.328431	0.0465398	1
A_12_P100774	NM_076121	twk-26	-0.115181	0.660085	1	-0.362705	0.183677	1
A_12_P100775	NM_001029510	dgk-2	0.0392164	0.80853	1	0.779289	0.000552151	0.0404118
A_12_P100777	NM_070658	ZK550.3	-0.113601	0.427644	1	-0.115689	0.419472	1
A_12_P100778	NM_059006	C44E4.1	0.133627	0.388214	1	-0.133539	0.388516	1
A_12_P100779	NM_074966	T19C9.8	0.306468	0.427276	1	0.780889	0.0608531	1
A_12_P100780	NM_063321	cct-1	0.241619	0.0698254	1	-0.100104	0.420686	1
A_12_P100781	NM_064052	ttr-18	-0.661817	0.0378431	1	-0.156873	0.584105	1
A_12_P100782			-0.0471574	0.827434	1	0.15221	0.486563	1
A_12_P100783	NM_061017	W09G3.1	0.0373895	0.723272	1	0.189122	0.0948132	1
A_12_P100784	NM_077708	tag-147	-0.488164	0.0997416	1	-1.37561	0.000435101	0.0345662
A_12_P100786	NM_001028614	F11A3.2	0.175478	0.254903	1	-0.83866	0.000168009	0.0179339
A_12_P100787	NM_076863	F48E3.9	-0.175206	0.651946	1	-1.037	0.0201295	0.559251
A_12_P100788			0.88853	0.0014665	0.0882528	0.0124663	0.952939	1
A_12_P100789	NM_066270	upp-1	0.070525	0.839207	1	-0.700435	0.0650369	1
A_12_P100790	NM_075844	ttr-37	1.70008	5.02057e-05	0.00777406	1.81983	2.80615e-05	0.00552646
A_12_P100791	NM_060835	amx-2	2.23141	0.000231284	0.0223028	1.33767	0.00754952	0.265933
A_12_P100792	NM_062197	M151.4	0.729732	0.0603164	1	-1.33169	0.00307746	0.136397
A_12_P100793	NM_074162	unc-39	1.17347	0.00606955	0.257826	0.916513	0.0222184	0.603946
A_12_P100794	NM_066381	atg-13	0.811254	0.0011179	0.0717881	-0.866086	0.000699573	0.0475657
A_12_P100796			0.547282	0.0632695	1	-1.47498	0.000207196	0.0206761
A_12_P100797	NM_066882	mev-1	0.0786867	0.497856	1	0.00869566	0.939589	1
A_12_P100798	NM_001026929	nhr-21	0.0560005	0.748232	1	-0.472502	0.0190294	0.535666
A_12_P100799	NM_069073	F42A9.8	-0.0907262	0.54855	1	-0.758634	0.000382922	0.031576
A_12_P100800	NM_072832	ZC190.4	0.694708	0.0305165	0.875352	1.12221	0.00221779	0.107859
A_12_P100802	NM_071852	F41F3.1	-2.34899	0.00199161	0.111625	0.466235	0.432157	1
A_12_P100803	NM_060677	R05D7.5	0.736453	0.000126807	0.0144387	0.188794	0.156266	1
A_12_P100804	NM_060585	F35E2.8	0.898133	0.206962	1	-2.63812	0.00259244	0.120437
A_12_P100806	NM_069035	T26A8.1	0.366097	0.033053	0.927898	-0.229326	0.153252	1
A_12_P100807	NM_066198	T21D11.1	4.16946	0.00134973	0.082957	5.27894	0.000235753	0.0227032
A_12_P100808	NM_001047726	Y37H2A.12	0.200614	0.304345	1	-0.460605	0.031935	0.800978
A_12_P100809	NM_076427	tsp-14	-0.041816	0.841584	1	1.40223	3.91713e-05	0.0068954
A_12_P100810	NM_074376	srsx-37	1.64106	0.0332271	0.93165	0.338404	0.622705	1
A_12_P100811	NM_058610	Y23H5A.3	-0.0355635	0.842702	1	-0.536362	0.0115819	0.366695
A_12_P100812	NM_061996	ubc-15	0.501021	0.00400952	0.188456	-0.468806	0.00597816	0.223932
A_12_P100814	NM_001026379		-1.54235	0.000792043	0.0553266	0.450688	0.198656	1
A_12_P100815	NM_001129408	tag-333	0.0472445	0.778682	1	-0.435028	0.0236399	0.63467
A_12_P100816	NM_171360	Y73B6BL.33	0.186924	0.124441	1	-0.11314	0.334335	1
A_12_P100817	NM_064136	ZK930.5	-1.04032	0.00267893	0.138839	1.25403	0.000741907	0.0495331
A_12_P100818	NM_072618	C37C3.7	1.22884	0.000267037	0.0246887	-0.229438	0.333519	1
A_12_P100819	NM_077602	set-6	0.443368	0.0135967	0.474348	-0.397604	0.023135	0.62432
A_12_P100820	NM_067114	Y41C4A.8	-0.17219	0.487827	1	1.1448	0.000699929	0.0475805
A_12_P100821	NM_075439	daf-28	1.02899	0.00617171	0.261178	0.358241	0.258378	1
A_12_P100822	NM_067999	Y37E11AL.9	0.910954	0.30536	1	-0.377992	0.663657	1
A_12_P100823	NM_067236	Y111B2A.8	0.164475	0.500685	1	-0.0319727	0.894686	1
A_12_P100824	NM_074872	nhr-116	0.561792	0.0344559	0.959384	-0.122511	0.606166	1
A_12_P100825	NM_071646	R08F11.1	-0.446789	0.0444565	1	-0.908747	0.000848804	0.0544288
A_12_P100826	NM_062724	C18A3.3	0.453429	0.0147104	0.50283	-0.0155292	0.921976	1
A_12_P100827	NM_060288	Y106G6E.1	-1.20794	0.0251153	0.755838	-0.0152944	0.974154	1
A_12_P100828	NM_078460	H11L12.1	-0.151751	0.347324	1	-1.08295	3.23489e-05	0.00604954
A_12_P100830	NM_077849	efn-3	-1.37314	0.147357	1	-0.992604	0.282958	1
A_12_P100831	NM_001025971	C05B5.8	1.10983	8.42957e-05	0.0109341	0.401954	0.0458466	1
A_12_P100832	NM_182357	tnt-4	0.608704	0.0548947	1	0.910804	0.00860513	0.293068
A_12_P100833	NM_059743	gna-2	-0.0207685	0.908154	1	-1.05584	0.000119838	0.0143053
A_12_P100834	NM_065659	R144.5	0.0628143	0.63706	1	0.162836	0.235544	1
A_12_P100837	NM_075389	Y43F8B.9	1.59812	0.000619829	0.0460006	0.507276	0.152937	1
A_12_P100838	NM_063847	ZK673.5	0.37023	0.330218	1	-4.15733	3.69737e-07	0.000353328
A_12_P100839	NM_171156	T12A2.15	0.222693	0.38697	1	-0.0159538	0.949628	1
A_12_P100840	NM_059452	snt-4	0.286912	0.0850751	1	0.493871	0.00804715	0.278784
A_12_P100841	NM_066562	tag-256	-0.0581306	0.733481	1	-0.841742	0.000457679	0.0356653
A_12_P100842	NM_069332	gln-6	0.54234	0.176761	1	-1.34132	0.00478343	0.189452
A_12_P100843	NM_061435	fbxc-51	2.8555	0.000194615	0.0196757	-1.73855	0.00608938	0.226885
A_12_P100844	NM_076634	T13C5.3	-6.85817	4.70373e-06	0.00209018	-2.49235	0.0096462	0.319296
A_12_P100845	NM_061289	B0432.7	0.0906634	0.793298	1	-0.299662	0.394445	1
A_12_P100846	NM_063434	cutl-12	0.575001	0.161163	1	1.19826	0.010119	0.330925
A_12_P100847	NM_067027	W09D6.5	0.149817	0.351179	1	1.13039	2.14724e-05	0.00468329
A_12_P100848	NM_001136371	Y71H2AM.6	0.0433283	0.766099	1	-0.118488	0.422549	1
A_12_P100849	NM_064391	F32A11.3	-3.20961	3.19634e-05	0.00583655	0.955469	0.0619751	1
A_12_P100850	NM_171000	C25H3.7	-0.0299351	0.822941	1	-0.129051	0.345165	1
A_12_P100851	NM_171790	unc-9	0.565193	0.0200512	0.63661	0.297154	0.177902	1
A_12_P100852	NM_078076	F14F4.1	0.581181	0.0370758	1	-0.798221	0.00791889	0.275605
A_12_P100853	NM_063377	eif-3.G	0.375632	0.0139383	0.483343	0.372108	0.0146238	0.437249
A_12_P100855	NM_070792	dod-19	-0.492656	0.015015	0.510443	0.545729	0.00873924	0.29658
A_12_P100856	NM_070187	nol-9	0.509366	0.0025038	0.132367	-0.64529	0.000475787	0.0366412
A_12_P100857	NM_059953	pbs-7	0.049218	0.72581	1	-0.399079	0.0149192	0.444084
A_12_P100858	NM_074778	nhr-54	0.895466	0.00153306	0.0913907	0.0197431	0.926593	1
A_12_P100859	NM_069798	ttr-50	-0.383232	0.28143	1	-2.1551	7.20793e-05	0.0102657
A_12_P100860	NM_078331	F39F10.4	0.565145	0.083634	1	-1.63853	0.000224624	0.0218919
A_12_P100861			-1.88766	2.84277e-05	0.00548932	1.94397	2.2032e-05	0.00476561
A_12_P100862	NM_074315	C01G10.7	-0.284849	0.0539738	1	-0.708559	0.000275099	0.0251437
A_12_P100863	NM_071310	F53E10.4	-0.67046	0.00802654	0.318541	0.0737942	0.725149	1
A_12_P100864	NM_062976	F41G3.6	0.214745	0.223426	1	-0.790842	0.000712262	0.0481022
A_12_P100865	NM_001029402	F14F3.4	-4.36968	0.000568947	0.0430385	0.195162	0.830337	1
A_12_P100866	NM_001047570		-0.167921	0.263472	1	0.236816	0.125474	1
A_12_P100869	NM_001027117	egl-43	0.605819	0.00139304	0.0848954	0.25069	0.101916	1
A_12_P100870	NM_073550	T27F2.4	1.66835	0.00154486	0.0918711	1.74072	0.00115142	0.0675125
A_12_P100871			0.596291	0.0146352	0.500739	-0.161553	0.444711	1
A_12_P100872	NM_063460	atf-2	-4.57714	0.000191461	0.0194522	-0.230273	0.781087	1
A_12_P100873	NM_068322	C02B10.3	0.859625	0.0178016	0.581204	0.762073	0.0309752	0.783061
A_12_P100874	NM_075484	F19B2.6	0.0559714	0.752931	1	0.199738	0.274806	1
A_12_P100877	NM_062009	T11F1.3	-0.396336	0.105223	1	-0.942464	0.00167613	0.0881478
A_12_P100878	NM_078287	C06G1.2	-2.80031	0.00132577	0.0818182	0.324781	0.62269	1
A_12_P100879	NM_074034	srx-136	-0.0184972	0.965099	1	0.320861	0.454327	1
A_12_P100880	NM_061509	snf-3	0.00852187	0.980803	1	-0.15644	0.660257	1
A_12_P100881	NM_069915	F35G2.3	0.769562	0.164626	1	-3.24384	8.0494e-05	0.011051
A_12_P100883	NM_070436	Y40H7A.11	-2.34841	2.11302e-05	0.00459078	-2.37566	1.9104e-05	0.00442237
A_12_P100884	NM_066304	tag-277	-0.46675	0.0123576	0.44064	-0.280985	0.097305	1
A_12_P100885	NM_078096	dsc-1	-0.0181944	0.951248	1	-0.0233871	0.937364	1
A_12_P100887	NM_001047297	F12E12.11	-0.374144	0.0322895	0.912599	0.338419	0.0484759	1
A_12_P100889	NM_066309	cup-4	0.0988622	0.47785	1	0.282907	0.0606711	1
A_12_P100890	NM_001128965	D1081.11	-1.41462	0.00562217	0.243649	1.17242	0.015659	0.461454
A_12_P100891	NM_076172	ddr-2	-0.0150804	0.939458	1	0.451662	0.0414779	0.980298
A_12_P100892	NM_070350	tra-3	-0.306519	0.0200915	0.637557	-0.95394	5.67122e-06	0.00203777
A_12_P100893	NM_069314	acc-1	0.710373	0.0391531	1	-0.345997	0.275644	1
A_12_P100894	NM_076649	W05H9.1	-0.0198587	0.913191	1	1.56591	4.36938e-06	0.00173526
A_12_P100896	NM_066462	ZK1236.1	0.14319	0.261239	1	-0.377327	0.0103718	0.337001
A_12_P100898	NM_062206	F19B10.6	0.588688	0.337702	1	0.00969915	0.987096	1
A_12_P100899	NM_067614	lgc-30	0.572801	0.0155452	0.523432	0.01832	0.927911	1
A_12_P100900	NM_001129161	T06D4.1	1.40294	0.0878978	1	-1.35631	0.0974771	1
A_12_P100901	NM_182224	F18C5.10	-1.26931	0.000151285	0.0163798	0.355429	0.132337	1
A_12_P100903	NM_001025937	F14B6.6	0.367497	0.072588	1	0.514636	0.0183505	0.520726
A_12_P100904	NM_072019	ceh-33	0.383067	0.0852822	1	-0.255622	0.231789	1
A_12_P100906	NM_059867	tba-5	2.12029	0.0152754	0.517123	-0.0175461	0.981255	1
A_12_P100907	NM_075633	amx-3	0.222229	0.396607	1	0.0832675	0.746937	1
A_12_P100909	NM_065438	dnj-16	0.23171	0.120464	1	-0.0711186	0.614128	1
A_12_P100910	NM_070517	gamma-glutamyltranspeptidase	0.184641	0.314361	1	-0.253184	0.176806	1
A_12_P100911	NM_059257	ptr-10	-7.39635	1.08864e-08	9.40655e-05	-1.15591	0.0270456	0.704649
A_12_P100913	NM_069192	rpb-12	0.278856	0.0592396	1	-0.269936	0.0664409	1
A_12_P100914	NM_001129364	ZK809.8	-0.232677	0.164672	1	-0.0645415	0.686552	1
A_12_P100915	NM_068048	clec-76	-0.0413774	0.879393	1	0.977258	0.00414499	0.17005
A_12_P100916	NM_072222	F13H6.5	0.23862	0.173788	1	0.459885	0.0178927	0.511524
A_12_P100917	NM_068154	set-33	0.762931	0.0740759	1	-0.792528	0.0650623	1
A_12_P100918	NM_076251	F47B7.2	-0.19261	0.188454	1	0.368896	0.0219746	0.598854
A_12_P100920	NM_001026821	C26D10.7	1.12372	0.111083	1	0.225589	0.733309	1
A_12_P100921	NM_001026002	plk-1	-0.123051	0.438094	1	-0.949836	8.96859e-05	0.0117677
A_12_P100922	NM_170813	Y51F10.2	0.00585236	0.971803	1	-1.18118	2.30663e-05	0.00488959
A_12_P100923	NM_171400	spp-10	-0.076139	0.660735	1	-0.151869	0.388086	1
A_12_P100924			2.92345	0.00407107	0.190404	1.19674	0.161714	1
A_12_P100925	NM_064241	Y57A10C.9	0.205374	0.829988	1	1.04718	0.287069	1
A_12_P100928			-1.14042	0.0171265	0.563649	-0.0559054	0.891855	1
A_12_P100929	NM_064804	unc-45	0.661017	0.00420711	0.195449	0.423514	0.0402653	0.958102
A_12_P100930	NM_058957	ZK973.9	0.283977	0.0637339	1	-0.69659	0.000435878	0.034607
A_12_P100931	NM_171092	H06I04.1	0.347574	0.132355	1	-0.38626	0.0985575	1
A_12_P100932	NM_059135	Y110A7A.19	0.224155	0.105261	1	-0.189783	0.162655	1
A_12_P100934	NM_067422	sid-2	0.529758	0.023892	0.726883	1.61398	9.58336e-06	0.00287974
A_12_P100935	NM_171248	K11H12.8	-0.274926	0.156723	1	-0.125462	0.500991	1
A_12_P100936	NM_063362		-1.52911	3.0514e-05	0.0057014	-0.186891	0.406845	1
A_12_P100937	NM_001029685	nhr-1	0.537665	0.00295149	0.149335	-0.240107	0.113276	1
A_12_P100938	NM_074434	T06E6.10	-0.263974	0.0607486	1	-0.274633	0.0525748	1
A_12_P100939	NM_001025854	imp-1	0.0377846	0.855105	1	-1.44337	2.78276e-05	0.00550069
A_12_P100940	NM_069456	pps-1	-0.267472	0.107904	1	0.569559	0.00363988	0.154467
A_12_P100941	NM_076761	col-173	-0.0480021	0.903388	1	2.847	2.12505e-05	0.00465731
A_12_P100942	NM_065841	SR-famA	0.0951201	0.66617	1	-1.03852	0.000634583	0.044511
A_12_P100943	NM_070667	hsp-1	-0.0685335	0.581346	1	-0.176026	0.173663	1
A_12_P100944	NM_077863	cah-4	-0.527706	0.0343254	0.956634	-0.33242	0.154485	1
A_12_P100945	NM_062941	vps-33.2	-0.0402656	0.840909	1	-1.02669	0.000349695	0.0298108
A_12_P100946	NM_077462	C05C9.1	-3.39819	3.24234e-05	0.00588715	-0.290367	0.56122	1
A_12_P100947	NM_171652	sax-3	-0.224248	0.292558	1	-0.958255	0.00074745	0.049793
A_12_P100948	NM_066676	F54C8.6	1.7674	0.000902502	0.0609185	0.711347	0.0920106	1
A_12_P100949	NM_058648	W03D8.2	-1.30399	0.0018446	0.105185	1.06613	0.00650168	0.237865
A_12_P100952	NM_073241	lys-1	-0.257606	0.120455	1	0.0923176	0.556979	1
A_12_P100953	NM_001026068	eng-1	0.0515053	0.724703	1	-0.465089	0.00822845	0.283704
A_12_P100954	NM_065960	T12A2.8	0.0179105	0.898569	1	-0.589369	0.00149188	0.0809867
A_12_P100955	NM_065948	rps-3	0.0585845	0.614487	1	-0.105116	0.372801	1
A_12_P100957	NM_062911	T28D9.1	0.0967032	0.545194	1	-0.609202	0.00266112	0.122775
A_12_P100958	NM_059974	pqn-26	1.32862	0.0176277	0.576772	2.77455	0.000139034	0.0157851
A_12_P100959	NM_078181	gpn-1	0.46385	0.0625396	1	0.870862	0.00273865	0.125155
A_12_P100960	NM_078441	F39B3.2	0.372379	0.1425	1	-0.33472	0.183049	1
A_12_P100962	NM_069033	T26A8.2	0.926651	0.00132988	0.0820074	2.62695	1.77485e-07	0.000221786
A_12_P100963	NM_001027864		0.323332	0.104362	1	0.253912	0.191185	1
A_12_P100965	NM_001026925	lir-1	0.0145193	0.914658	1	-0.707339	0.000301876	0.0268165
A_12_P100966	NM_065399	Y1A5A.2	-0.179615	0.771432	1	2.23233	0.00392168	0.163334
A_12_P100967	NM_073238	nhr-232	0.47763	0.0823214	1	0.467981	0.0878148	1
A_12_P100968	NM_001027707	Y47D3A.31	-3.58253	0.000185966	0.019032	0.806958	0.228123	1
A_12_P100969	NM_066028	rpt-3	-0.140369	0.342551	1	-0.383852	0.0211289	0.580927
A_12_P100972	NM_077899	F55F3.3	0.319041	0.135518	1	0.351598	0.10377	1
A_12_P100973	NM_074509	Y6E2A.4	0.799805	0.29617	1	0.683437	0.368519	1
A_12_P100976	NM_068612	nspb-5	3.15495	0.00226318	0.122841	3.37723	0.00143138	0.0786275
A_12_P100977	NM_077908	M03B6.4	-0.323882	0.134737	1	-0.811921	0.00215253	0.105548
A_12_P100978	NM_073629	R07B7.10	-1.2529	0.000192747	0.0195576	-0.946581	0.00153689	0.0827895
A_12_P100979			0.13591	0.280513	1	0.600564	0.000479943	0.0368167
A_12_P100980	NM_078427	mlc-2	0.0841915	0.660788	1	-0.310955	0.125457	1
A_12_P100981	NM_072023	srg-25	0.224639	0.585156	1	-0.520613	0.220127	1
A_12_P100982	NM_001028248	W03F8.10	0.383074	0.049844	1	0.173935	0.335924	1
A_12_P100983	NM_060073	F14B4.1	0.288804	0.0796189	1	-0.790008	0.000313707	0.027636
A_12_P100984	NM_071949	K11D12.6	0.355892	0.191514	1	-3.14826	1.80419e-07	0.000224025
A_12_P100985	NM_001027211	nhr-61	0.164624	0.397381	1	-0.262014	0.189462	1
A_12_P100986	NM_076580	W06B11.1	-0.422795	0.0488499	1	0.304193	0.138169	1
A_12_P100987	NM_060750	E03H4.8	0.751135	0.0166214	0.551017	0.38956	0.168126	1
A_12_P100989	NM_001028240	hlh-30	0.968658	0.0741854	1	0.0453486	0.927614	1
A_12_P100990	NM_062621	EEED8.12	1.88053	0.00130174	0.0807799	0.829816	0.0811275	1
A_12_P100991	NM_072226		-0.29625	0.183981	1	0.14905	0.489445	1
A_12_P100993	NM_062927	sra-27	0.822149	0.292614	1	-0.67785	0.381356	1
A_12_P100995	NM_069427	W01B6.8	-1.79972	0.0613673	1	0.399019	0.651027	1
A_12_P100996	NM_076970	C02B8.3	0.779516	0.00161253	0.09503	0.653514	0.00498835	0.195359
A_12_P100997	NM_001028335	Y54G2A.5	-1.21485	0.00436343	0.201214	0.93697	0.0181312	0.516108
A_12_P100998	NM_074623	T10C6.5	-0.029027	0.87943	1	-0.790067	0.00165954	0.0874629
A_12_P100999			0.731748	0.000185048	0.0189945	-0.496015	0.00304115	0.13523
A_12_P101000	NM_171717	flp-26	0.515011	0.0021099	0.116882	0.306697	0.03486	0.85773
A_12_P101001	NM_067599	lgc-33	1.46573	2.17992e-07	0.000357886	0.452247	0.00369493	0.156171
A_12_P101002	NM_073710	cdr-5	-1.94138	3.65573e-05	0.00634832	-2.72153	1.77803e-06	0.000985387
A_12_P101003	NM_065159	E02H9.4	0.326924	0.115649	1	0.224	0.265459	1
A_12_P101004	NM_075801	unc-1	0.415774	0.0286686	0.834608	0.542528	0.00752208	0.265182
A_12_P101005	NM_058746	W05F2.7	0.21689	0.123785	1	-0.350735	0.0214785	0.588194
A_12_P101006	NM_076013	AH9.1	-0.222975	0.351024	1	-0.895971	0.00272862	0.124813
A_12_P101007	NM_063853	ZK666.2	-1.53242	0.00283036	0.144736	1.23209	0.0102772	0.334539
A_12_P101008	NM_061021	W04A8.4	-0.7472	0.00281617	0.14418	1.90852	1.38377e-06	0.000836605
A_12_P101009	NM_065853	R12B2.3	-1.54724	0.00436219	0.201201	0.664871	0.147828	1
A_12_P101010	NM_073781	dhs-21	0.381442	0.111024	1	0.827391	0.00345175	0.148588
A_12_P101011	NM_001026663	Y87G2A.18	0.276963	0.0850776	1	-0.458603	0.00996676	0.327408
A_12_P101013	NM_069031	M116.5	0.194243	0.388859	1	-0.254694	0.26474	1
A_12_P101015	NM_064219	sre-52	1.15364	0.0513891	1	1.41238	0.0219157	0.597706
A_12_P101016	NM_063605	Y51B9A.5	-3.02358	1.55323e-05	0.00388612	0.531541	0.207863	1
A_12_P101017	NM_001129561	ric-4	0.54579	0.00384562	0.183099	0.356464	0.035047	0.86152
A_12_P101018	NM_074032	ttr-21	1.48982	0.0439919	1	1.28851	0.0744717	1
A_12_P101020	NM_170886	W02D3.12	0.287525	0.116163	1	0.383331	0.0446107	1
A_12_P101022	NM_070435	Y40H7A.10	-2.09007	0.000683618	0.049426	-1.41301	0.00856753	0.292219
A_12_P101024	NM_060550	F15D3.5	1.0095	0.0763192	1	-0.72515	0.186416	1
A_12_P101025	NM_001037896	fpn-1.1	-0.0740267	0.771015	1	0.514626	0.0638806	1
A_12_P101026	NM_069374	nhr-4	0.580429	0.00499521	0.22197	-0.574657	0.0053025	0.204298
A_12_P101027	NM_074636	F14H3.3	1.95533	0.0254801	0.764003	-2.39855	0.00916261	0.30707
A_12_P101028	NM_063797	R05H5.7	3.1413	0.00087246	0.0594636	-0.988829	0.17407	1
A_12_P101029	NM_066698	ZK1098.7	0.0545751	0.694159	1	-0.0171628	0.901236	1
A_12_P101030	NM_068870	C50F7.10	-0.124557	0.403083	1	0.225541	0.14468	1
A_12_P101033	NM_070636	itsn-1	0.641128	0.0142433	0.49149	-0.407042	0.0899862	1
A_12_P101034	NM_059033	C10H11.7	-2.75888	3.01378e-05	0.00565264	0.715957	0.0950791	1
A_12_P101036	NM_058609	Y23H5A.4	-1.94098	0.00171137	0.0993637	0.97569	0.0596471	1
A_12_P101037	NM_073496	deg-3	0.924866	0.000849479	0.058365	0.376412	0.0865823	1
A_12_P101038	NM_060934	M01E5.3	0.187847	0.526102	1	-0.832901	0.0152547	0.451742
A_12_P101039	NM_062605	sec-6	-0.228622	0.104725	1	-0.526183	0.00206392	0.102404
A_12_P101040			-2.9655	7.34436e-05	0.00993829	1.48772	0.00924442	0.30931
A_12_P101041	NM_065394	nlp-10	-0.263016	0.26814	1	0.48324	0.0563612	1
A_12_P101042	NM_069156	C53B4.3	-0.493758	0.00264865	0.137943	0.214924	0.116086	1
A_12_P101043	NM_064744	C29F9.5	0.815041	0.23344	1	-0.927715	0.179362	1
A_12_P101044	NM_069964	rps-23	-0.104127	0.436264	1	-0.006487	0.960714	1
A_12_P101045	NM_001026400	M01B12.5	0.565403	0.00571413	0.246746	-0.304786	0.0892473	1
A_12_P101046	NM_077267	C17G1.5	0.775409	0.00112706	0.0722478	0.56505	0.00831938	0.285842
A_12_P101047	NM_063894	M28.2	1.15525	0.00475731	0.214287	1.26244	0.00273413	0.125006
A_12_P101048	NM_059451	F37E3.3	-4.41123	0.000138823	0.0154133	0.669863	0.390608	1
A_12_P101050	NM_073126	lipase	0.526996	0.201943	1	1.54773	0.00239954	0.113996
A_12_P101052	NM_071172	ckb-4	-0.0757623	0.578689	1	0.275545	0.0630143	1
A_12_P101055	NM_170821	tpxl-1	0.0267899	0.921115	1	-0.525074	0.074121	1
A_12_P101057	NM_073965	F53F4.2	1.41343	0.00828245	0.32655	0.969693	0.048484	1
A_12_P101058	NM_069554	efn-2	0.375146	0.173551	1	0.678138	0.024152	0.645548
A_12_P101059	NM_065502	nex-3	0.996619	0.00176844	0.101915	0.0683383	0.779425	1
A_12_P101061	NM_001136426	F47H4.2	-0.369658	0.403903	1	1.23808	0.0150952	0.448336
A_12_P101062	NM_001027982	F28E10.1	0.603138	0.0574571	1	-0.0480451	0.867941	1
A_12_P101063	NM_070004	K08E7.1	0.0154987	0.910856	1	-0.934568	3.70356e-05	0.00664396
A_12_P101064	NM_076591		0.928932	0.000430964	0.035025	-1.76929	1.75617e-06	0.000978803
A_12_P101065	NM_065617	C35D10.12	0.924618	0.000325368	0.0285991	0.227055	0.22172	1
A_12_P101067	NM_062600	F09E5.8	-0.0750282	0.55018	1	-0.221845	0.0970595	1
A_12_P101068	NM_001027302	ctl-2	-0.501056	0.015917	0.53257	0.905777	0.000367311	0.0307038
A_12_P101069	NM_077279	F19C6.4	0.387633	0.0478131	1	-1.24816	2.51141e-05	0.00518936
A_12_P101071	NM_001025995	egl-5	0.517948	0.166117	1	0.506061	0.175151	1
A_12_P101072	NM_001025982	ckk-1	0.113541	0.624814	1	-0.225573	0.339635	1
A_12_P101073	NM_077339	rme-4	0.316458	0.0504831	1	-0.634151	0.00119205	0.0690433
A_12_P101074	NM_001129299	F13H10.4	-0.379677	0.0312378	0.890185	-0.140069	0.378397	1
A_12_P101076	NM_072107	K09H11.1	-0.383114	0.0248649	0.749982	0.47634	0.00825261	0.28422
A_12_P101078	NM_068436	C39H7.1	-4.96604	9.65486e-06	0.00301043	0.736406	0.258485	1
A_12_P101080	NM_069392	kin-5	-2.97268	2.93132e-05	0.00557796	1.08739	0.0260407	0.683793
A_12_P101081	NM_069630	ZK593.3	0.417872	0.010888	0.400541	1.54934	3.59156e-07	0.000348806
A_12_P101082	NM_072926	F59E11.2	1.0416	0.000115111	0.0135717	-0.0408963	0.817171	1
A_12_P101084	NM_071627	W08A12.2	-1.58318	3.43895e-05	0.00610845	-0.819719	0.00458578	0.18345
A_12_P101085	NM_072733	protease	-0.87152	0.0201534	0.639108	1.12591	0.00509292	0.198346
A_12_P101086	NM_068832	nol-10	0.31582	0.0788394	1	-0.901469	0.000219887	0.0215498
A_12_P101087			-4.72468	1.6144e-05	0.00396898	-0.506113	0.433259	1
A_12_P101088	NM_068908	kin-26	-4.19873	5.40462e-06	0.00224406	1.17432	0.0363931	0.886555
A_12_P101089	NM_071560	srab-20	-0.0517652	0.867023	1	0.544686	0.100343	1
A_12_P101090	NM_059105	C46H11.3	1.30683	5.74345e-05	0.00846259	0.890808	0.00112359	0.0662466
A_12_P101091	NM_182270	srg-69	1.03121	0.000264489	0.0245316	0.479363	0.0294356	0.753165
A_12_P101092	NM_067335	F56A8.8	0.198872	0.429203	1	-2.59022	7.06954e-07	0.000535243
A_12_P101094	NM_063078	gld-3	0.277437	0.109811	1	-1.17419	2.04455e-05	0.0045685
A_12_P101095	NM_069774	col-128	-6.61985	0.000118018	0.0137984	-1.98535	0.100378	1
A_12_P101096	NM_076800	ist-1	0.493724	0.126792	1	-1.12226	0.00348441	0.149584
A_12_P101097			0.196899	0.699822	1	-0.508367	0.329505	1
A_12_P101098	NM_065447	F43C1.5	0.0787054	0.666474	1	0.805391	0.0010204	0.0619496
A_12_P101100	NM_070140	JC8.2	0.334963	0.0375156	1	-0.544051	0.00294054	0.131877
A_12_P101103	NM_064224	Y57A10B.2	0.571546	0.505217	1	0.541794	0.527167	1
A_12_P101104	NM_060024	F36F2.2	-0.499896	0.0470237	1	-0.00216052	0.992401	1
A_12_P101105	NM_062580	EGAP2.2	0.526997	0.115955	1	-1.59725	0.00037262	0.0309695
A_12_P101106	NM_181961	R148.5	-2.6145	0.000125803	0.0143831	-0.944758	0.055624	1
A_12_P101107	NM_070684	C49C3.8	-0.158782	0.294888	1	-0.676781	0.00079004	0.0518468
A_12_P101108	NM_063785		-0.0068956	0.982139	1	5.0207	9.67301e-09	3.41932e-05
A_12_P101109	NM_069025	D2096.11	0.0430112	0.809638	1	-0.24335	0.191548	1
A_12_P101110	NM_069365	K07F5.8	-2.4211	8.94815e-06	0.00287867	0.968652	0.00841152	0.28815
A_12_P101111	NM_074855	clec-35	-0.291876	0.197298	1	-0.9127	0.00146178	0.079828
A_12_P101112	NM_064887	F23H11.3	-0.701157	0.00137243	0.0839452	-0.447805	0.0191167	0.537544
A_12_P101113	NM_073850	far-3	-1.77176	0.00407407	0.190509	0.154666	0.754185	1
A_12_P101114	NM_074700	gcy-20	1.11493	0.00641007	0.268239	-0.296892	0.384017	1
A_12_P101115	NM_063942	ptr-8	1.92407	0.000694559	0.050051	2.40589	0.000123521	0.0146088
A_12_P101116	NM_058592	Y23H5B.3	0.194453	0.364453	1	-0.241088	0.265977	1
A_12_P101117	NM_076455	ZC449.4	0.331029	0.082002	1	-0.0144291	0.934618	1
A_12_P101118	NM_001028186	T04C4.1	0.496693	0.0529128	1	-0.765469	0.00688802	0.248295
A_12_P101119	NM_060420	F55A3.3	0.108655	0.465209	1	-0.65651	0.000954276	0.0589381
A_12_P101120	NM_059290	obr-4	-0.202725	0.113779	1	-0.096061	0.431175	1
A_12_P101121	NM_077707	R09A8.2	1.43359	0.0117954	0.425307	-2.30075	0.000579386	0.0417821
A_12_P101123	NM_062846	T24H7.4	0.164424	0.342354	1	-0.899951	0.000261816	0.0243315
A_12_P101125	NM_068542	F58F9.7	0.0385276	0.828343	1	1.3185	1.61876e-05	0.00402851
A_12_P101126	NM_067136	Y56A3A.2	0.0366575	0.836171	1	0.231612	0.209206	1
A_12_P101127		unc-103	0.653686	0.00855086	0.334544	0.207391	0.326774	1
A_12_P101128	NM_061000	Y6B3B.3	-2.27842	0.00109768	0.0707929	0.535687	0.315037	1
A_12_P101129	NM_181909	C28H8.9	0.254051	0.117528	1	-0.919446	9.47692e-05	0.0122038
A_12_P101130	NM_001027219	rga-1	-0.199126	0.131559	1	-0.588322	0.000640448	0.0447942
A_12_P101132	NM_060654	Y47H10A.4	0.0110486	0.941579	1	0.222651	0.160471	1
A_12_P101134	NM_070460	Y73F8A.27	-0.0595153	0.685684	1	-0.333506	0.0413052	0.97698
A_12_P101135	NM_074369	M01B2.6	0.88209	0.0015357	0.0914927	0.202506	0.348322	1
A_12_P101138	NM_068818	R05G6.1	0.285723	0.201423	1	0.365993	0.110224	1
A_12_P101139	NM_078387	acdh-10	0.178992	0.180837	1	1.09906	4.33183e-06	0.0017291
A_12_P101140	NM_063586	D2013.6	0.118766	0.572547	1	-0.20312	0.341783	1
A_12_P101141	NM_066643	T02C1.1	0.298665	0.297388	1	2.02533	1.96489e-05	0.00449024
A_12_P101142	NM_068203	F29B9.5	0.527551	0.0776992	1	-0.0143882	0.958373	1
A_12_P101144	NM_001136405	ccr-4	0.604434	0.00153805	0.0915631	-0.663301	0.000800144	0.0522738
A_12_P101145	NM_001083181	cdka-1	0.494787	0.0468092	1	0.24377	0.290895	1
A_12_P101146	NM_074529	nhr-60	-0.373798	0.102332	1	-0.789266	0.00342314	0.147713
A_12_P101147	NM_063402	W01C9.2	-1.37701	0.301303	1	0.139601	0.914249	1
A_12_P101148	NM_073940	F25H9.6	-0.0109836	0.94633	1	-0.490573	0.0113568	0.360925
A_12_P101149	NM_060861	F08A8.2	-1.69914	0.00452398	0.206624	-1.5556	0.00759194	0.267045
A_12_P101150	NM_065323	M01F1.6	0.0402498	0.745873	1	0.0803229	0.521078	1
A_12_P101151	NM_077518	EGF-repeats	-0.31095	0.0929497	1	0.685981	0.00209636	0.103661
A_12_P101152		cdh-10	-3.2208	0.00125071	0.0783448	-0.168792	0.821739	1
A_12_P101154	NM_064814	lec-6	0.00240892	0.993627	1	0.768461	0.0256034	0.674996
A_12_P101155	NM_066204	synaptobrevin	-0.259325	0.149511	1	-0.693366	0.00184462	0.0940591
A_12_P101156	NM_001136363	F17C8.6	1.2991	9.7333e-05	0.0120022	0.357443	0.119964	1
A_12_P101157			0.117999	0.658317	1	-0.354738	0.200313	1
A_12_P101158	NM_070707	C06A12.3	-1.41757	0.0278555	0.817	-0.948219	0.116703	1
A_12_P101159	NM_058452	Y92H12BR.4	0.457337	0.358019	1	0.5336	0.287132	1
A_12_P101160	NM_063426	F28C6.10	0.795163	0.00501538	0.222639	-1.45461	6.18023e-05	0.00931424
A_12_P101161	NM_001047808	K11G12.6	0.0703942	0.54885	1	-0.93071	8.39538e-06	0.00264518
A_12_P101162	NM_001027840	mcm-6	-0.273394	0.21286	1	-0.991362	0.000665463	0.0458828
A_12_P101164	NM_059530	W02D3.1	0.0417809	0.77327	1	0.202757	0.181015	1
A_12_P101165	NM_073310	vps-54	-0.0865173	0.550407	1	-0.270574	0.0816831	1
A_12_P101166	NM_070311	oac-38	-0.211667	0.891935	1	-0.0761867	0.960983	1
A_12_P101167	NM_061945	T05A8.7	0.716215	0.248608	1	-1.33077	0.0458013	1
A_12_P101170	NM_001136399	vps-26	-0.598218	0.00884014	0.342583	-0.887361	0.000697938	0.0474863
A_12_P101171	NM_073671	lrx-1	1.14759	0.0134453	0.470449	4.18049	6.22076e-07	0.000492111
A_12_P101172	NM_061297	clec-117	-4.56933	1.73278e-06	0.00123394	1.34036	0.0166989	0.485278
A_12_P101173	NM_070991	Y50D4A.4	0.186857	0.153092	1	-0.854061	3.13685e-05	0.00594026
A_12_P101174	NM_075626	clec-264	0.0990813	0.526276	1	0.0320552	0.83608	1
A_12_P101175	NM_064145	W03C9.6	-0.832763	0.000107535	0.012935	0.00911911	0.948095	1
A_12_P101176	NM_061284	Y43H11AL.1	0.276335	0.116707	1	-0.752008	0.000842763	0.0541653
A_12_P101177	NM_076810	C55B6.5	-1.55006	0.00667641	0.277116	0.187042	0.690784	1
A_12_P101178	NM_064640	C38C6.3	-3.38107	0.000170763	0.0178818	3.59187	0.000104707	0.0130468
A_12_P101179	NM_061238	F23F1.5	0.616042	0.0176628	0.577585	-0.848789	0.002885	0.129847
A_12_P101180	NM_069479	daf-14	0.741985	0.00333604	0.16393	-0.126392	0.531179	1
A_12_P101181	NM_072122	let-418	-0.0418206	0.684006	1	-0.432608	0.00141655	0.0780755
A_12_P101182	NM_058426	Y48G8AL.7	0.215691	0.183609	1	-0.233971	0.152212	1
A_12_P101183	NM_071488	gst-23	0.311106	0.208502	1	1.07409	0.00088125	0.0558702
A_12_P101184			-0.131557	0.446668	1	-0.143913	0.406483	1
A_12_P101185	NM_059508	D2092.1	0.0871958	0.664673	1	-0.103663	0.607026	1
A_12_P101186	NM_068497	unc-44	0.273964	0.162263	1	0.565537	0.0108151	0.347907
A_12_P101187	NM_073232	C12D8.1	0.266259	0.0817928	1	-0.645165	0.000825484	0.0533838
A_12_P101188	NM_182385	srm-6	0.0664313	0.928069	1	0.70405	0.349455	1
A_12_P101189	NM_065652	C27F2.9	-0.0614757	0.649943	1	-0.487255	0.00393615	0.163763
A_12_P101190	NM_062610	pkc-3	-0.393919	0.0121013	0.433472	-0.530808	0.00204953	0.101873
A_12_P101191	NM_001047487	rsd-2	-0.0301751	0.866771	1	-0.32662	0.0916008	1
A_12_P101192	NM_059973	trt-1	0.413527	0.0924592	1	-0.659757	0.0139534	0.421669
A_12_P101193		Y92H12BM.1	0.158998	0.680169	1	-0.731287	0.0789955	1
A_12_P101194	NM_001029326	cca-1	-0.0543842	0.758903	1	-0.800416	0.000874737	0.055583
A_12_P101195	NM_001025889	C53H9.2	0.0504828	0.645128	1	-0.32869	0.0111998	0.357471
A_12_P101196	NM_074139	F14D7.2	1.27495	0.0310484	0.886274	-1.73689	0.00652709	0.238512
A_12_P101197	NM_060749	oac-13	-0.455051	0.464265	1	-1.04969	0.10939	1
A_12_P101198	NM_070502	Y105C5B.14	-1.76923	0.000174401	0.0181706	-2.10745	4.1138e-05	0.00711689
A_12_P101199	NM_001027083	M05D6.9	-0.762329	0.161633	1	0.832576	0.12976	1
A_12_P101201	NM_063778	ZK945.4	-0.0803641	0.686493	1	-1.49087	1.45628e-05	0.00377417
A_12_P101202	NM_069675	T05E11.6	0.77221	0.000905073	0.0610186	-0.582481	0.00571621	0.216333
A_12_P101203	NM_077592	Y62H9A.12	-3.48035	4.75251e-05	0.00752368	0.405949	0.450916	1
A_12_P101204	NM_059670	F52A8.1	-0.321705	0.0528136	1	-0.048596	0.747464	1
A_12_P101205	NM_061964	F08D12.12	0.635028	0.00525186	0.230765	-0.224761	0.238964	1
A_12_P101206	NM_066727	hcp-3	0.270846	0.106587	1	-0.690561	0.00106704	0.0638623
A_12_P101207	NM_075041	C18D4.6	0.0532107	0.70526	1	-0.85688	8.55729e-05	0.0114596
A_12_P101208	NM_059820	che-3	0.194968	0.31836	1	1.09057	0.000145868	0.0163342
A_12_P101209	NM_060906	F22G12.5	0.039669	0.832762	1	-0.717987	0.00275597	0.125581
A_12_P101212	NM_061286	pqn-85	-0.0647587	0.802889	1	-0.509397	0.0709876	1
A_12_P101214	NM_067872	Y54G2A.23	-0.0694796	0.736977	1	-0.106413	0.608354	1
A_12_P101215	NM_075353	F55C9.5	-0.93483	0.0223138	0.692343	-3.52244	1.19649e-06	0.000757212
A_12_P101216	NM_067184	osm-12	0.764808	0.119652	1	-0.379272	0.41892	1
A_12_P101217	NM_075742	irk-2	0.465896	0.0125162	0.444868	0.113606	0.477366	1
A_12_P101218	NM_001047348	T27A1.5	0.370939	0.0231828	0.71111	0.865504	8.99927e-05	0.011786
A_12_P101219	NM_068469	C06E7.2	0.478262	0.0149615	0.509107	0.0437211	0.794726	1
A_12_P101221	NM_001029206	pak-1	-0.104232	0.5335	1	-0.812797	0.000487282	0.0371907
A_12_P101222	NM_067769	C54E4.5	-0.993911	0.000202187	0.0202681	-1.39298	1.17437e-05	0.0033103
A_12_P101223	NM_171241	prdx-6	0.137704	0.308389	1	0.396202	0.0112947	0.359515
A_12_P101224	NM_072591	C12D5.10	0.545453	0.0644532	1	-0.626171	0.0381972	0.91959
A_12_P101226		srt-62	0.68157	0.212841	1	0.455282	0.395154	1
A_12_P101229	NM_068629	Y73B6A.1	-2.55317	3.20364e-06	0.0017483	1.01324	0.00456043	0.182704
A_12_P101230	NM_170980	lgc-27	-0.681263	0.00954293	0.363147	1.5385	2.67417e-05	0.0053754
A_12_P101231		K03H1.10	-0.840026	0.00697136	0.285949	0.375412	0.16277	1
A_12_P101232	NM_077846	col-183	0.543602	0.732463	1	-0.550792	0.729083	1
A_12_P101233	NM_068808	F55G1.15	-0.610312	0.027119	0.800602	0.14791	0.54585	1
A_12_P101234	NM_075085	R12G8.1	0.821138	0.0942379	1	0.701671	0.145379	1
A_12_P101235	NM_072233	alh-4	0.190986	0.395131	1	0.0367594	0.867672	1
A_12_P101237	NM_059384	T05E7.4	2.49229	1.21999e-05	0.00340063	1.70217	0.000294502	0.0263082
A_12_P101238	NM_068314	R13H9.5	-4.22985	8.02864e-06	0.00272748	0.824695	0.138706	1
A_12_P101239	NM_001029792	Y60A9A.1	-0.154274	0.609352	1	-1.10664	0.00346994	0.149146
A_12_P101240	NM_065239	R10F2.5	0.618717	0.0155189	0.522904	0.555392	0.0259398	0.68189
A_12_P101241	NM_059442	ZC328.2	-0.279737	0.45423	1	-0.292186	0.434983	1
A_12_P101242	NM_059300	F33D11.9	-0.00998597	0.956329	1	-0.955281	0.000294545	0.0263082
A_12_P101244	NM_068614	F38A5.7	0.046211	0.847261	1	-0.0823789	0.731851	1
A_12_P101245	NM_068445	C55C3.4	-3.03384	3.3069e-05	0.00596024	1.22926	0.017188	0.496185
A_12_P101246	NM_077743	bcat-1	-0.456192	0.016936	0.558976	0.784534	0.000587203	0.0422217
A_12_P101247	NM_062876	lgg-1	0.950242	6.23776e-05	0.0089917	0.519717	0.00503311	0.19668
A_12_P101248	NM_069405	F44D12.2	0.406366	0.0079787	0.317027	0.324741	0.02491	0.660812
A_12_P101250	NM_067078	Y66D12A.24	0.605924	0.0496678	1	0.230448	0.416606	1
A_12_P101251	NM_064981	fbxa-19	0.948864	0.0106707	0.394513	0.92992	0.0118771	0.373541
A_12_P101252	NM_075977	Y102A11A.1	0.124253	0.594043	1	0.21406	0.365136	1
A_12_P101254	NM_070425	clec-190	0.904481	0.0361001	0.994578	-5.31967	4.80237e-08	9.04744e-05
A_12_P101255	NM_001026808	sptl-1	-0.203731	0.183835	1	-0.636965	0.00116323	0.0680403
A_12_P101257	NM_058833	F53F10.3	-0.302187	0.0169504	0.559275	-0.822552	1.3739e-05	0.00364032
A_12_P101258			-1.95969	0.000305723	0.0272818	-0.573809	0.148186	1
A_12_P101259	NM_072387	F20A1.10	0.603279	0.00712143	0.290616	1.40727	1.27218e-05	0.00346408
A_12_P101260	NM_068620	C01B10.10	-0.0837478	0.732884	1	1.13365	0.000740616	0.0494637
A_12_P101263	NM_069787	Y24F12A.1	0.302305	0.0880158	1	-0.767823	0.000693844	0.0472897
A_12_P101264	NM_001129123	unc-105	0.992452	0.000634533	0.0468186	0.11037	0.601215	1
A_12_P101265	NM_064946	Y119D3B.16	0.553608	0.0854321	1	0.197263	0.512519	1
A_12_P101267	NM_075160	F16H6.6	-0.63395	0.0518231	1	-1.03236	0.00482065	0.190618
A_12_P101269	NM_001047685	R10D12.14	0.43479	0.0467288	1	-0.386413	0.0715976	1
A_12_P101270	NM_075802	tza-2	1.46549	0.000105062	0.0126803	-0.596161	0.0318072	0.798487
A_12_P101271			-1.41493	0.00203223	0.113508	0.89348	0.0263771	0.690744
A_12_P101272	NM_060306	Y106G6G.1	-1.99703	0.000169458	0.0177641	0.161898	0.650371	1
A_12_P101273	NM_065347	C14B1.3	0.264931	0.209331	1	0.641539	0.00857925	0.292466
A_12_P101274	NM_069792	lys-5	-0.374137	0.0611871	1	0.858049	0.000659949	0.0456456
A_12_P101275	NM_075624	F31D4.2	0.292064	0.0962616	1	-0.424008	0.0235381	0.632803
A_12_P101276	NM_073330	twk-12	0.787956	0.0148786	0.507167	-0.233965	0.405112	1
A_12_P101277	NM_074928	ZK218.1	0.748368	0.00557636	0.242038	0.10914	0.620788	1
A_12_P101278	NM_071454	clec-210	-0.595586	0.0350709	0.97223	1.30078	0.000322991	0.028243
A_12_P101279	NM_001026117	icl-1	0.0822235	0.533888	1	-0.354508	0.0192498	0.540515
A_12_P101280	NM_061369	W04H10.1	-2.91412	0.000214407	0.0211909	0.68925	0.214899	1
A_12_P101281	NM_062814	H12I13.5	-0.0652999	0.911567	1	0.337505	0.569041	1
A_12_P101282	NM_065228	H34I24.1	-2.90979	0.000267972	0.0247193	0.69322	0.223966	1
A_12_P101284	NM_066363	grp-1	0.0440955	0.739044	1	-1.04932	8.87734e-06	0.00274488
A_12_P101286		F21G4.3	-1.81733	0.026003	0.776005	2.11292	0.0125069	0.388397
A_12_P101287	NM_066096	med-2	0.759261	0.0269423	0.796527	0.278694	0.365227	1
A_12_P101288	NM_062122	bath-10	0.503319	0.0219518	0.683653	-1.94605	9.09169e-07	0.000629397
A_12_P101289	NM_066782	ZK632.12	-0.287352	0.0239899	0.729071	-0.645379	0.000130607	0.0151529
A_12_P101290	NM_059729	ncbp-2	0.191124	0.149417	1	-0.163944	0.210135	1
A_12_P101291	NM_075366	C14B4.2	0.152011	0.559373	1	-0.0507088	0.844413	1
A_12_P101292	NM_061349	mab-9	0.399561	0.145037	1	0.682218	0.0221678	0.603029
A_12_P101293	NM_001029265	C30F2.5	-0.826649	0.000127743	0.0144907	-0.204621	0.16998	1
A_12_P101294	NM_076933	C39D10.7	-0.838877	0.227207	1	-1.32243	0.0697575	1
A_12_P101295	NM_067481	R02D3.5	0.636707	0.0194891	0.62308	-0.05725	0.808334	1
A_12_P101297	NM_074857	clec-31	-0.475356	0.023161	0.710707	-0.281351	0.144646	1
A_12_P101298	NM_171495	mod-1	0.515952	0.00512343	0.226309	-0.0439824	0.768359	1
A_12_P101299	NM_001027456	hlh-11	1.14139	0.00265882	0.138264	0.38571	0.211724	1
A_12_P101301	NM_001026630	Y6B3B.5	0.272831	0.081649	1	-0.683787	0.000643093	0.0448832
A_12_P101302	NM_001083146	T23G11.6	-2.01213	4.32914e-05	0.00708087	-0.0695311	0.819004	1
A_12_P101304	NM_076355	lst-2	0.0984555	0.685322	1	-0.352092	0.166165	1
A_12_P101305	NM_069134	T11B7.5	0.0390535	0.836881	1	0.62562	0.00677237	0.245026
A_12_P101306	NM_072808	F25G6.9	0.00983501	0.954761	1	-0.22397	0.214415	1
A_12_P101307	NM_058760	tag-63	-0.174952	0.264559	1	-0.995971	4.7508e-05	0.00786206
A_12_P101308	NM_170798	aps-3	-0.33313	0.11706	1	-0.626251	0.00897353	0.302361
A_12_P101310	NM_077909	M03B6.3	-7.60246	7.81035e-06	0.00270484	-1.11844	0.251481	1
A_12_P101312	NM_001129105	C04G6.13	-1.10377	0.0876672	1	0.0922965	0.87759	1
A_12_P101313	NM_067081	spe-6	-2.25676	2.3818e-05	0.0049086	0.912985	0.0143232	0.430656
A_12_P101314	NM_068240	permease	-0.477582	0.0790878	1	-1.57831	6.74445e-05	0.00981585
A_12_P101315	NM_062703	bli-2	-7.11738	7.90699e-06	0.00271289	-0.402619	0.650438	1
A_12_P101316	NM_001027761	smr-1	0.01317	0.936591	1	-0.435027	0.0222064	0.603767
A_12_P101317	NM_069151	D1046.3	0.259093	0.0708357	1	-0.234206	0.0977296	1
A_12_P101318	NM_077885	C40C9.3	-1.35209	0.0824695	1	1.73436	0.032677	0.815885
A_12_P101320			0.265198	0.0548695	1	-0.377962	0.0112022	0.357471
A_12_P101321	NM_067709	nhr-287	-0.00118137	0.994185	1	0.251652	0.142126	1
A_12_P101323	NM_171198	ran-2	-0.201238	0.177598	1	-0.565174	0.00217055	0.106151
A_12_P101324	NM_071053	nhr-178	-0.29616	0.097107	1	0.590222	0.00438872	0.177181
A_12_P101325	NM_071582	C07G3.2	1.65175	0.000886322	0.0601444	0.663085	0.0920274	1
A_12_P101326	NM_058788	cah-6	1.20254	0.000911848	0.0613804	0.543399	0.0631575	1
A_12_P101329	NM_061161	K05C4.9	0.324398	0.129462	1	0.0700139	0.729087	1
A_12_P101331	NM_065942	C23G10.5	0.0600199	0.677938	1	-0.441066	0.0102486	0.333858
A_12_P101332	NM_072544	F19F10.3	0.384021	0.00609513	0.258689	0.875621	1.22609e-05	0.00339048
A_12_P101333	NM_073514	dhs-19	-0.4106	0.0812794	1	-0.341094	0.138565	1
A_12_P101334	NM_059950	K07A12.7	-0.0463223	0.803236	1	-0.551382	0.0121112	0.379003
A_12_P101336	NM_001026150	C09G9.8	3.10117	9.87087e-05	0.0121185	-0.785766	0.149222	1
A_12_P101337	NM_062741	acdh-8	-3.34863	2.08649e-05	0.00455733	0.718715	0.142919	1
A_12_P101338	NM_076576	F13D11.1	0.619756	0.00262442	0.13699	1.7166	5.83115e-07	0.000471752
A_12_P101339	NM_182344	ugt-39	-1.18195	0.00386784	0.183855	-1.03414	0.00848287	0.289961
A_12_P101340	NM_072716	K07C11.8	-0.387904	0.0175304	0.574214	-0.640069	0.000835889	0.0538381
A_12_P101341	NM_065130	fbxa-39	0.944808	0.0877071	1	-0.183955	0.72062	1
A_12_P101342		tag-308	0.844237	0.0102667	0.382835	0.80409	0.0132769	0.406041
A_12_P101343	NM_060409	B0205.11	-0.0356142	0.763373	1	-0.170652	0.168636	1
A_12_P101344	NM_062689	C17G10.7	1.29041	0.000510507	0.039839	-0.0660109	0.803427	1
A_12_P101347	NM_069570	K08C7.4	2.99997	5.146e-08	0.000177946	2.08954	1.62358e-06	0.000934092
A_12_P101348	NM_064892	F23H11.6	2.94726	1.78342e-05	0.00422312	2.87403	2.22197e-05	0.00479207
A_12_P101349	NM_182373	T03F7.7	3.3744	1.08537e-05	0.00320328	1.99156	0.000796592	0.0521547
A_12_P101350	NM_001027283	csp-1	-0.360549	0.229964	1	0.0900468	0.756246	1
A_12_P101351	NM_062035	lin-8	0.121773	0.38076	1	-0.37189	0.0185359	0.524901
A_12_P101352	NM_062017	K08A2.2	-2.26383	0.000109421	0.0130955	0.441074	0.263053	1
A_12_P101353	NM_067072	Y47D3B.11	0.373487	0.0559302	1	0.0754551	0.672159	1
A_12_P101354	NM_072039	F08F3.1	0.0685769	0.825449	1	-0.645399	0.0585296	1
A_12_P101355			-0.0146576	0.959223	1	-1.51303	0.000278033	0.0253018
A_12_P101356	NM_076553	T22B7.7	-1.25835	0.00860457	0.335909	-3.16666	8.73296e-06	0.00272406
A_12_P101357	NM_070133	lev-1	0.149493	0.337923	1	-0.345055	0.0422397	0.993337
A_12_P101358	NM_068100	scrm-8	-3.43874	1.04007e-05	0.00311203	0.952766	0.0504111	1
A_12_P101359	NM_077536	F52D10.2	-0.537005	0.0107003	0.395349	-1.30341	1.71526e-05	0.00415703
A_12_P101360	NM_075598	Y44A6C.1	0.668102	0.00122418	0.0770743	-0.60076	0.00250619	0.117537
A_12_P101362	NM_059467	dbr-1	0.0344581	0.81098	1	-0.209833	0.16529	1
A_12_P101363	NM_065149	W04B5.4	0.125623	0.392084	1	-0.438834	0.0105935	0.342425
A_12_P101364	NM_171135	cct-6	0.138375	0.385265	1	-0.270173	0.106362	1
A_12_P101365	NM_072232	atp-4	0.187963	0.1684	1	-0.20529	0.135856	1
A_12_P101366	NM_064421	Y48C3A.14	-0.274602	0.0833334	1	-0.664941	0.000864939	0.0551659
A_12_P101367	NM_060532	K08C9.5	-4.47433	1.89225e-05	0.00432429	-2.13901	0.00489597	0.192759
A_12_P101369	NM_001029699	T02C5.1	-0.250414	0.14192	1	0.854722	0.000268486	0.0247468
A_12_P101370	NM_072112	F44E7.3	-0.419618	0.104247	1	1.19201	0.000458586	0.0357161
A_12_P101371	NM_001028964	T11F9.10	0.933954	0.000634908	0.0468186	-0.107608	0.588387	1
A_12_P101373	NM_069734	B0035.11	0.0311501	0.806664	1	-0.467524	0.0035375	0.151267
A_12_P101374	NM_077889	gck-4	1.28521	0.00021612	0.0212798	-0.705965	0.0116184	0.367643
A_12_P101375	NM_001047227	T28B8.3	-0.0931918	0.860477	1	0.397796	0.459064	1
A_12_P101376	NM_069571	fmo-2	0.529006	0.347594	1	2.99759	0.000218092	0.021426
A_12_P101379	NM_073470	srh-46	-2.53359	0.00311473	0.155679	-2.61332	0.00255256	0.119219
A_12_P101380	NM_066712	C48B4.10	0.281906	0.122307	1	-0.29034	0.11274	1
A_12_P101381	NM_061216	F33H2.6	0.0514398	0.813297	1	-0.0685067	0.753378	1
A_12_P101383	NM_065312	C34C12.8	-0.444547	0.00319933	0.158766	-0.688157	0.000134106	0.01544
A_12_P101384	NM_073729	inx-11	0.0617811	0.71448	1	-0.544582	0.00759732	0.267187
A_12_P101385	NM_063899	M28.5	0.40448	0.0120993	0.43344	-0.462628	0.00572768	0.216638
A_12_P101386	NM_066840	kel-10	-3.47035	1.22538e-05	0.00340998	1.2149	0.0201129	0.558949
A_12_P101387	NM_059351	ZK484.4	0.437934	0.010219	0.38166	-0.817702	0.000145849	0.0163342
A_12_P101388		sqv-6	0.550237	0.0411756	1	-0.500555	0.0590141	1
A_12_P101389	NM_074279	hil-1	0.0958774	0.6032	1	-1.54004	5.36123e-06	0.00197152
A_12_P101390	NM_062471	dnj-9	-0.410813	0.0654196	1	-0.875193	0.00127993	0.0726055
A_12_P101391	NM_059196	F27C1.1	-5.99702	0.000564003	0.0427569	0.601992	0.631313	1
A_12_P101392	NM_060870	pbs-2	-0.112549	0.427954	1	0.0521594	0.70988	1
A_12_P101393	NM_068373	ZK354.7	-4.60224	4.49199e-06	0.00205636	0.570322	0.301361	1
A_12_P101394	NM_063275	DH11.2	0.0146809	0.933106	1	1.36235	1.06311e-05	0.0030899
A_12_P101395	NM_069947	ufd-1	-0.225513	0.106472	1	-0.481833	0.00346182	0.148907
A_12_P101396	NM_066611	F02A9.4	0.429775	0.0195269	0.623982	0.173264	0.290109	1
A_12_P101397	NM_069141	oma-1	0.127027	0.536097	1	-1.15307	0.000157544	0.0172102
A_12_P101398	NM_076043	T07D1.2	-0.204273	0.159324	1	0.588595	0.00132552	0.0745448
A_12_P101399	NM_001136332	ZK858.6	-0.902399	0.00969503	0.367332	-0.125123	0.669095	1
A_12_P101400	NM_075584	F46B3.16	-1.59239	0.092936	1	-0.957083	0.29085	1
A_12_P101401	NM_058336	W04C9.6	0.333301	0.653795	1	-0.18315	0.80465	1
A_12_P101402	NM_065289	Y53G8AR.9	0.0238237	0.924867	1	-0.109607	0.665808	1
A_12_P101403	NM_001047400	sma-4	-0.26648	0.117919	1	-0.415625	0.0233935	0.629953
A_12_P101404	NM_078138	Y15E3A.4	0.225201	0.411741	1	-1.07423	0.00211751	0.10434
A_12_P101405	NM_171175	ten-1	0.0321793	0.894967	1	-0.941529	0.0025842	0.12031
A_12_P101406	NM_065658	C27F2.8	-0.150319	0.368646	1	-0.62805	0.00271568	0.124482
A_12_P101407	NM_078459		0.217555	0.462016	1	-1.52076	0.00030591	0.0271196
A_12_P101408	NM_072000	carboxylesterase	1.35825	0.0123965	0.441667	0.178198	0.699116	1
A_12_P101409	NM_078024	sym-5	-3.83734	1.60253e-06	0.00119315	0.152976	0.70334	1
A_12_P101412	NM_071837	Y61A9LA.4	0.902143	0.00256249	0.134636	-0.250546	0.296083	1
A_12_P101414	NM_058852	abf-1	-0.944119	0.0707213	1	-3.38608	2.52344e-05	0.00519211
A_12_P101415	NM_069115	C33D9.5	0.671767	0.00876644	0.340433	-0.0593299	0.780997	1
A_12_P101416	NM_074194	R02D5.1	0.928458	0.00449423	0.205527	-0.0652963	0.803763	1
A_12_P101417			3.22586	4.80041e-05	0.00758277	4.31336	3.69216e-06	0.00157812
A_12_P101418	NM_076969	C02B8.7	0.638411	0.00394721	0.186219	0.499435	0.0155934	0.459999
A_12_P101419	NM_069484	Y43C5A.4	-1.58337	0.00643927	0.269218	1.00259	0.0554716	1
A_12_P101421	NM_060798	H16D19.3	-4.10441	0.000262298	0.024417	-2.2905	0.0121738	0.380582
A_12_P101422	NM_170827	Y23H5B.7	0.284153	0.187644	1	0.318241	0.144203	1
A_12_P101423	NM_068227	E04A4.6	0.881655	0.0222733	0.691359	-0.225321	0.506858	1
A_12_P101424	NM_063049	ZK1127.2	-3.3317	3.61288e-05	0.00631731	0.956008	0.0738693	1
A_12_P101425	NM_063015	cyn-10	0.0467067	0.7287	1	-0.79719	0.000108606	0.0133796
A_12_P101426	NM_060460	Y52B11A.10	0.546157	0.00336062	0.164851	-0.33634	0.0408266	0.968112
A_12_P101429	NM_075746	C02H7.2	0.527138	0.0453652	1	-0.334824	0.177741	1
A_12_P101430	NM_170825	Y39G10AR.18	0.766766	0.0170502	0.561576	-0.180966	0.516699	1
A_12_P101431	NM_067594	Y55F3BL.2	0.282422	0.109677	1	-0.482151	0.0132602	0.405658
A_12_P101432	NM_067369	F45G2.3	-0.105573	0.51717	1	-0.938137	0.000128328	0.0149803
A_12_P101434	NM_078204	F59F4.3	-0.203521	0.204806	1	-0.33688	0.0483315	1
A_12_P101435	NM_077993	K04G11.4	0.522547	0.00361027	0.174241	-0.460446	0.00766213	0.269038
A_12_P101436	NM_072110	C53A3.2	1.24068	0.000535349	0.0411466	3.0239	2.24648e-07	0.000260019
A_12_P101438	NM_075250	Y17D7C.1	2.2593	0.000476162	0.0378206	1.58637	0.00520092	0.201492
A_12_P101439	NM_064171	Y17G7B.18	0.123458	0.560971	1	-0.805261	0.00276094	0.125729
A_12_P101440	NM_072040	glc-3	1.12509	0.000168523	0.0176898	0.442969	0.0461453	1
A_12_P101441	NM_077927	F48F7.7	0.714883	0.0544418	1	0.607832	0.0939264	1
A_12_P101442	NM_001027412	mpk-1	0.486731	0.0176725	0.577807	0.165406	0.359198	1
A_12_P101443	NM_060292	ced-12	0.137059	0.45186	1	-0.576649	0.00792794	0.275822
A_12_P101445			0.702567	0.00302619	0.15227	-0.39583	0.0539974	1
A_12_P101446	NM_069150	D1046.1	0.147292	0.207445	1	-0.650941	0.000130667	0.0151553
A_12_P101448	NM_063443		0.20485	0.258969	1	0.378861	0.0509766	1
A_12_P101449	NM_068332	C24D10.1	-3.45895	5.58323e-06	0.00227725	0.789278	0.0782441	1
A_12_P101451	NM_073855	cdh-6	0.51897	0.0298906	0.861428	-0.0311138	0.882783	1
A_12_P101452	NM_062163	cyh-1	0.154009	0.47634	1	-0.453159	0.054136	1
A_12_P101454	NM_063912		1.14851	1.85364e-05	0.00428593	0.305268	0.0737451	1
A_12_P101455	NM_076063	F52H2.7	0.169261	0.247642	1	-0.730779	0.000327932	0.0285304
A_12_P101456	NM_058821	C32E8.9	-0.468222	0.00549398	0.239416	-1.05244	1.19019e-05	0.00333388
A_12_P101457	NM_001029135	pme-5	-0.282351	0.0927444	1	-0.153593	0.336354	1
A_12_P101458	NM_171783	sma-5	1.31001	0.00527223	0.231525	1.47003	0.00257341	0.119998
A_12_P101460	NM_075575	ttr-12	-4.61508	7.78462e-06	0.00270484	1.03086	0.0940004	1
A_12_P101461	NM_063935	cap-2	-0.0134414	0.921318	1	0.377748	0.0170716	0.49366
A_12_P101463	NM_069645	Y43E12A.2	2.92805	1.10104e-06	0.000963358	2.81549	1.58758e-06	0.000925596
A_12_P101466	NM_068914		0.0443756	0.778862	1	-0.549549	0.00493416	0.193702
A_12_P101467	NM_058419	R06A10.4	2.40398	1.44336e-07	0.000283169	2.06465	6.17381e-07	0.000489384
A_12_P101468	NM_073066	C50F4.14	-0.125869	0.570958	1	-0.102778	0.642686	1
A_12_P101469	NM_001026439	hsr-9	0.117195	0.551248	1	-0.616238	0.00864706	0.29419
A_12_P101470	NM_070300	F52B11.5	0.122648	0.623914	1	0.579507	0.0375877	0.909838
A_12_P101472	NM_067261	lgc-37	0.563372	0.0669581	1	0.305612	0.291625	1
A_12_P101473	NM_076128	wrt-2	-7.71456	2.953e-06	0.00167198	0.195208	0.82058	1
A_12_P101474	NM_171605	hot-2	0.934243	0.00464683	0.21047	0.150976	0.572674	1
A_12_P101475	NM_182380	K07B1.4	-0.621598	0.0185472	0.599166	-1.40206	8.06317e-05	0.0110622
A_12_P101476	NM_073984	F58G11.4	0.756131	0.00172761	0.100218	-0.19163	0.310754	1
A_12_P101477	NM_001136463	sma-9	0.254634	0.152919	1	-0.0900672	0.596612	1
A_12_P101478	NM_072305	grl-9	4.04088	0.0429982	1	1.67853	0.35939	1
A_12_P101479	BJ108201	ZK632.9	-0.156789	0.167033	1	0.0200591	0.852767	1
A_12_P101480	NM_170792	F56C11.4	0.622641	0.0391219	1	-0.167374	0.538865	1
A_12_P101481	NM_071967	srab-3	-0.024522	0.926698	1	-2.20032	6.31324e-06	0.00217907
A_12_P101482	NM_058965	T21E12.5	-2.69207	0.00605741	0.257508	1.10487	0.186679	1
A_12_P101485	NM_059964	C36B1.8	-0.11848	0.627715	1	-0.827471	0.00563786	0.213956
A_12_P101486	NM_076002	F48B9.1	1.46334	0.0140242	0.485422	2.06515	0.00182031	0.0932984
A_12_P101487	NM_061071	C37A5.1	-0.958314	0.00520846	0.229265	0.666865	0.033104	0.824187
A_12_P101488	NM_067765	glb-7	-0.286642	0.156275	1	-0.16397	0.401418	1
A_12_P101489	NM_077692	F45E6.1	1.18439	0.0761825	1	-0.124061	0.840327	1
A_12_P101490	NM_182266	btb-18	0.894583	0.000173348	0.0180801	0.983076	8.04705e-05	0.011051
A_12_P101491	NM_065343	T27D1.3	1.14901	0.000139398	0.015458	0.157118	0.438104	1
A_12_P101492	NM_065012	M01G5.1	0.473403	0.0145302	0.498059	-0.411888	0.0281312	0.726662
A_12_P101493	NM_001027076	cwn-1	-0.372429	0.0405895	1	0.0173792	0.915021	1
A_12_P101494	NM_062732	ifb-2	0.553675	0.0154321	0.520963	1.08781	0.000182821	0.0189656
A_12_P101495	NM_071179	srbc-20	0.864695	0.251124	1	-0.229377	0.753401	1
A_12_P101496	NM_063761	ZK892.3	-4.79315	1.04138e-05	0.00311203	0.743929	0.24204	1
A_12_P101497	NM_059730	rrf-1	0.82617	0.00273787	0.141166	-0.415829	0.0758753	1
A_12_P101498	NM_061575	Y51H7C.13	-5.3532	0.000737043	0.0522867	3.5334	0.0103342	0.336115
A_12_P101499	NM_001026722	hlh-1	0.597916	0.00570433	0.246502	0.134467	0.451028	1
A_12_P101501	NM_069875	lips-6	5.6164	0.000119799	0.0139319	1.87156	0.0723927	1
A_12_P101502	NM_071825	Y47D7A.13	4.70777	0.000201626	0.0202232	7.87129	2.36483e-06	0.00118654
A_12_P101504	NM_058935	ndx-7	-0.248918	0.128147	1	-0.148957	0.344656	1
A_12_P101505	NM_063757	sdz-38	0.0991335	0.69926	1	-1.68295	4.60046e-05	0.00767477
A_12_P101506	NM_069036	T01B11.1	0.345627	0.152643	1	0.159083	0.492788	1
A_12_P101508	NM_001027704	Y47D3A.20	-0.0638722	0.685877	1	-0.402774	0.0250139	0.662896
A_12_P101509	NM_076542	unc-97	0.144912	0.416926	1	0.240693	0.189659	1
A_12_P101511	NM_074717	oac-6	0.786254	0.0979456	1	1.38944	0.0089686	0.302298
A_12_P101512	NM_071952	K11D12.8	-1.68935	3.86318e-05	0.00656766	-0.987401	0.00232473	0.111486
A_12_P101513	NM_074510	Y6E2A.5	0.171717	0.575222	1	0.634558	0.0575883	1
A_12_P101514	NM_058956	phosphatase	-0.203494	0.160609	1	-0.334813	0.0315942	0.794666
A_12_P101516	NM_075406	Y43F8C.7	-0.0815815	0.593385	1	-0.284189	0.0832383	1
A_12_P101518	NM_067329	F56A8.3	-0.304069	0.208377	1	-0.291709	0.226046	1
A_12_P101519	NM_067834	smf-3	0.081077	0.824955	1	-0.0378956	0.917583	1
A_12_P101520	NM_062923	wrn-1	0.0776505	0.650554	1	-0.718372	0.00145211	0.0794439
A_12_P101521	NM_063012	C44B7.1	-0.213312	0.20469	1	-0.367663	0.0412006	0.975035
A_12_P101522	NM_001027679	gly-5	0.352409	0.0639075	1	0.155203	0.381298	1
A_12_P101523	NM_059324		0.669764	0.0163971	0.545146	-0.331739	0.185203	1
A_12_P101524	NM_064020	sqt-1	-4.96289	4.65979e-05	0.0074204	2.63425	0.0048945	0.192726
A_12_P101525	NM_171558	fbxa-156	-0.0502191	0.836766	1	1.35366	0.000184764	0.0190931
A_12_P101526	NM_061241	F23F1.6	2.33982	1.56482e-07	0.00029951	-0.0531741	0.781039	1
A_12_P101527	NM_064777	klp-20	0.499665	0.00240743	0.128677	-0.640032	0.000418346	0.0335408
A_12_P101528	NM_066289	ZK686.2	0.366256	0.0239444	0.728254	-0.113563	0.430073	1
A_12_P101529	NM_062375	B0286.1	-0.201749	0.106303	1	0.0487178	0.677706	1
A_12_P101530	NM_070180	Y62E10A.13	0.973958	0.00163952	0.0963178	-0.284968	0.242422	1
A_12_P101531	NM_073900	srh-18	1.00197	0.0345891	0.961938	1.4102	0.00625954	0.231488
A_12_P101533	NM_171695	C09B8.8	2.87324	2.19909e-07	0.000358966	1.00484	0.00164412	0.0868801
A_12_P101534	NM_069153		-0.301721	0.0418243	1	0.876506	4.53026e-05	0.007594
A_12_P101535	NM_001083193	C17H12.13	0.117889	0.391868	1	-1.05728	1.02225e-05	0.00301341
A_12_P101536	NM_070172	Y62E10A.6	0.180125	0.169851	1	-0.66176	0.00027099	0.0249089
A_12_P101537	NM_067138	Y56A3A.6	0.62522	0.00181336	0.103902	1.31397	4.50871e-06	0.00177217
A_12_P101538	NM_001047317	alh-6	-0.436587	0.0599564	1	-0.55184	0.0229691	0.620654
A_12_P101539	NM_059838	gla-3	0.0219248	0.937614	1	-1.08656	0.00252004	0.118022
A_12_P101540	NM_064741	fbxa-57	-0.138117	0.51603	1	-0.351609	0.116941	1
A_12_P101541	NM_068740	kcc-1	-0.221413	0.47896	1	-0.680217	0.0470616	1
A_12_P101543	NM_071997	carboxylesterase	-0.546406	0.0259617	0.775186	0.170183	0.436011	1
A_12_P101544	NM_071459	F02C9.4	-3.16557	2.01227e-06	0.00135199	0.836575	0.0292713	0.749792
A_12_P101547	NM_073901	srh-15	0.613834	0.0603508	1	1.08897	0.00368045	0.155837
A_12_P101548	NM_001027777	gly-11	-1.8763	1.56313e-05	0.00388925	-0.756977	0.0113125	0.359907
A_12_P101549	NM_072433	C13F10.1	1.2636	0.000224336	0.0218531	0.708759	0.0106602	0.343924
A_12_P101551	NM_065825	B0336.13	0.211231	0.160545	1	-0.754726	0.000278687	0.0253418
A_12_P101552	NM_001027516	M01F1.4	-0.230434	0.106526	1	-0.412094	0.00982528	0.323671
A_12_P101553	NM_066583	eif-3.D	0.0555025	0.69611	1	-0.1129	0.432407	1
A_12_P101554	NM_182268	C25H3.3	0.186744	0.19942	1	-0.699749	0.000410066	0.0331274
A_12_P101557	NM_066379	D2007.2	0.827165	5.29317e-05	0.00802689	0.349587	0.0183238	0.52017
A_12_P101559	NM_064801	F10C5.2	0.0831167	0.608806	1	-0.660478	0.00176401	0.0912742
A_12_P101560	NM_075269	Y17D7B.3	-0.397187	0.677542	1	0.144198	0.879548	1
A_12_P101562	NM_064367	F18A11.5	0.849902	0.00339157	0.165996	-0.131193	0.570715	1
A_12_P101563	NM_063247	T09A5.4	0.0682617	0.740583	1	-1.0396	0.000386721	0.0317771
A_12_P101564	NM_182170	Y17G7B.21	0.753529	0.0484734	1	0.128788	0.70964	1
A_12_P101565	NM_001047230	W03D8.11	-6.62485	7.39539e-06	0.00263318	-1.26701	0.142308	1
A_12_P101566	NM_077379		-1.8793	1.51248e-05	0.00382876	-1.52711	8.90564e-05	0.011726
A_12_P101567	NM_072469	nhr-263	0.340251	0.424847	1	-1.10725	0.0217586	0.594619
A_12_P101568	NM_061224	F31C3.3	0.2563	0.256879	1	-0.66365	0.0108135	0.347897
A_12_P101569	NM_058790	T28F2.2	-0.53619	0.00632547	0.265962	-1.09167	3.48159e-05	0.00634901
A_12_P101570	NM_065145	H14E04.3	0.984321	0.000229782	0.0221798	-0.636184	0.00484102	0.19111
A_12_P101571	NM_067294	ubq-2	-0.0298859	0.849103	1	0.0222644	0.887238	1
A_12_P101573	NM_065493	R07E5.13	-0.413656	0.0101545	0.379827	-0.916351	3.48304e-05	0.00634901
A_12_P101574	NM_062400	sra-32	0.545804	0.2486	1	-2.81077	8.15076e-05	0.0111047
A_12_P101575	NM_064048	W02B12.11	0.0422632	0.748397	1	0.0379549	0.773192	1
A_12_P101576	NM_001047375	C02D5.2	-1.0951	0.00215799	0.118691	0.0638996	0.816948	1
A_12_P101577			-1.8767	0.000775967	0.054467	0.436956	0.297237	1
A_12_P101579	NM_062648	F12A10.7	-0.373628	0.703044	1	-0.398884	0.684175	1
A_12_P101580	NM_059242	F46F11.9	0.0629884	0.558604	1	-0.0394406	0.71273	1
A_12_P101581	NM_061298	B0432.1	0.293312	0.11164	1	-0.917705	0.000262691	0.0243903
A_12_P101582	NM_067303	cyp-13A12	-2.6635	5.33561e-07	0.000626814	-0.195619	0.43573	1
A_12_P101583	NM_001129616	B0310.1	0.258752	0.253231	1	-0.339247	0.142854	1
A_12_P101584	NM_070629	Y116A8C.29	-0.669801	0.0117472	0.42408	-0.165048	0.467627	1
A_12_P101586	NM_069676	rps-5	0.112441	0.356507	1	-0.141707	0.250974	1
A_12_P101589	NM_001028923	grl-7	-5.422	6.39684e-05	0.00915415	3.15211	0.00352713	0.150988
A_12_P101590	NM_062853	F13H8.3	0.861706	0.00151767	0.0906171	-1.62891	9.25583e-06	0.00281314
A_12_P101591	NM_064534	F01D5.5	0.916409	0.00164203	0.0964506	1.60684	1.99278e-05	0.00451454
A_12_P101592	NM_066858	T20G5.12	0.417279	0.106342	1	0.325167	0.197003	1
A_12_P101593	NM_078405	C33E10.10	-0.42603	0.0832889	1	0.174572	0.449407	1
A_12_P101594	NM_073462	clec-223	1.03026	0.0126919	0.449955	-2.51864	2.13745e-05	0.00466453
A_12_P101595	NM_001029050		0.129381	0.742896	1	-0.512985	0.210448	1
A_12_P101597	NM_001047638	F21C10.11	-1.47232	0.012524	0.445039	0.749667	0.153972	1
A_12_P101598	NM_059797	H05L14.1	-4.57776	2.13908e-05	0.00461684	1.10955	0.103564	1
A_12_P101599	NM_070700	Thioredoxins	-0.391481	0.023376	0.715513	0.0799021	0.598346	1
A_12_P101600	NM_001027932	D2096.12	0.417592	0.0120922	0.433225	-0.788348	0.000172068	0.0182227
A_12_P101601	NM_062831	F40H3.2	0.803667	0.161826	1	0.272297	0.620214	1
A_12_P101602	NM_076508	syn-1	0.481445	0.0474048	1	-0.313172	0.172831	1
A_12_P101603	NM_063955	R03D7.5	-2.33386	3.16805e-05	0.00582504	0.975786	0.0143283	0.430712
A_12_P101604	NM_060296	ZC247.2	-0.249146	0.13015	1	-0.488302	0.0088553	0.299379
A_12_P101605	NM_074132	F40G12.6	1.00023	0.001513	0.0904838	0.522938	0.0482088	1
A_12_P101606			1.54026	0.394017	1	-0.328433	0.853221	1
A_12_P101608	NM_062132	peptidase	-4.39239	1.64786e-06	0.001213	0.524211	0.268951	1
A_12_P101609	CB391725		0.257054	0.437588	1	0.254781	0.44153	1
A_12_P101610	NM_073982	F58G11.2	0.116817	0.492291	1	-0.453282	0.0196627	0.549317
A_12_P101611	NM_001027400	nfm-1	0.137265	0.627535	1	-0.2332	0.414923	1
A_12_P101612			0.0646483	0.880913	1	-0.303865	0.48651	1
A_12_P101613	NM_060450	prp-17	-0.142381	0.398862	1	-0.820999	0.000451261	0.0353632
A_12_P101614	NM_068841	arf-1.1	0.310015	0.407093	1	0.594883	0.127465	1
A_12_P101615	NM_063251	T09A5.8	0.40087	0.0140322	0.485644	-0.782327	0.000166042	0.017791
A_12_P101616	NM_077288	ZC373.4	0.474412	0.0489705	1	-0.142523	0.51696	1
A_12_P101617	NM_061321	C03H5.3	0.106343	0.447239	1	-0.441055	0.00810034	0.28023
A_12_P101618	NM_058670	Y71F9AL.4	-0.0621968	0.76087	1	0.352732	0.106057	1
A_12_P101619	NM_074292	T01C3.9	-0.000945247	0.995128	1	-0.590037	0.00282555	0.127906
A_12_P101620	NM_074844	T20B3.1	-1.93611	1.02799e-05	0.00309561	-0.0303105	0.902598	1
A_12_P101621	NM_062779	vps-35	-0.531445	0.0750329	1	-0.881155	0.00798865	0.277246
A_12_P101622	NM_071227	nhr-225	0.572204	0.000766277	0.0539314	-0.24734	0.0677631	1
A_12_P101623	NM_075586	Y44A6B.3	-1.98669	0.000560995	0.0425847	-0.104484	0.800521	1
A_12_P101624	NM_077236	F15G9.5	0.242725	0.105963	1	-0.469707	0.00623876	0.230944
A_12_P101625	NM_073509	T11F9.8	0.716929	0.29075	1	1.69703	0.0244641	0.651714
A_12_P101626	NM_073258	K07C5.3	0.209772	0.196082	1	-0.312633	0.0656577	1
A_12_P101627	NM_001026164	C28D4.10	2.13082	0.0203606	0.644535	0.930749	0.257874	1
A_12_P101628	NM_065318	gly-14	-0.331166	0.153818	1	0.10891	0.623145	1
A_12_P101629	NM_001026539	pab-1	0.139713	0.457638	1	-0.503721	0.0190054	0.535202
A_12_P101630	NM_182348	ugt-29	0.0620607	0.722328	1	0.552912	0.00843496	0.288669
A_12_P101631	NM_072670	ZC513.5	-0.361798	0.0228299	0.702966	-1.0048	1.99058e-05	0.00451255
A_12_P101633	NM_001027033	mua-1	0.178862	0.253562	1	0.102733	0.502575	1
A_12_P101636	NM_062849	phb-2	-0.145162	0.244346	1	-0.407531	0.00586305	0.220482
A_12_P101637	NM_077076	F53A9.8	-0.541492	0.0806097	1	1.16485	0.00183283	0.0937031
A_12_P101638	NM_061888	K02F6.7	-3.30342	1.21734e-05	0.00339727	-0.382637	0.383441	1
A_12_P101639	NM_070341	oac-56	-1.25995	0.2052	1	0.329331	0.730749	1
A_12_P101640	NM_072012	Y49G5A.1	-2.65373	0.000305447	0.0272634	-0.875879	0.107667	1
A_12_P101641	NM_061445	fbxc-24	0.985992	0.0766089	1	-2.46763	0.000562407	0.0409871
A_12_P101643	NM_066960	W09D10.5	-1.24704	0.00015484	0.0166317	0.488522	0.0451593	1
A_12_P101644	NM_073712	cdr-6	-0.296253	0.0489603	1	0.522585	0.0026639	0.12284
A_12_P101647	NM_072117	nhr-142	-0.464434	0.0144641	0.49653	0.0109497	0.946057	1
A_12_P101648	NM_068955	F42G8.8	-0.932283	0.00214014	0.117891	-0.700168	0.0117616	0.37083
A_12_P101649	NM_070168	srsx-25	-0.24452	0.277093	1	-0.559032	0.0249921	0.662452
A_12_P101650	NM_171095	C44B11.6	-0.446987	0.00475039	0.21405	-0.415763	0.00726389	0.258495
A_12_P101652	NM_077380	M79.3	-1.97192	1.91538e-05	0.0043543	-2.31264	4.61419e-06	0.00178763
A_12_P101653	NM_060128	set-32	0.30423	0.135942	1	-0.597166	0.00962568	0.318778
A_12_P101654	NM_001047404	frm-2	-0.442053	0.00202447	0.113156	0.17504	0.134091	1
A_12_P101655	NM_064825	sbds-1	0.185564	0.224882	1	-0.209258	0.175229	1
A_12_P101656	NM_073783	cky-1	-2.33579	0.0183629	0.594433	-1.79876	0.0557146	1
A_12_P101657	NM_060118	F30A10.3	0.318353	0.0384784	1	-0.254877	0.0858276	1
A_12_P101658	NM_077113	C48C5.3	0.160836	0.417289	1	-0.624417	0.00805113	0.278872
A_12_P101659	NM_065668	klp-6	0.791735	0.00444562	0.204065	0.613216	0.0180299	0.514097
A_12_P101660	NM_060700	F56H6.1	2.25864	0.0013511	0.0830159	-0.807399	0.149342	1
A_12_P101661	NM_071540	C04E12.10	-0.585148	0.399317	1	-3.87669	0.000154236	0.0169352
A_12_P101662	NM_181963	K10D2.1	0.207772	0.171261	1	-0.736102	0.000368725	0.0307672
A_12_P101663	NM_070298	noah-2	-7.0853	8.33577e-09	9.12813e-05	-2.3695	0.000191669	0.01959
A_12_P101664	NM_064279	F49C5.5	1.69149	0.0359298	0.991	-0.878975	0.237504	1
A_12_P101665	NM_001027964	pme-3	-0.00565634	0.969167	1	-0.501567	0.00544358	0.208317
A_12_P101667	NM_075973	Y102A11A.5	-8.36645	2.87749e-08	0.00012686	-1.30098	0.0419487	0.988451
A_12_P101668	NM_060014	F32H2.10	0.479763	0.00649383	0.270979	-0.787883	0.00021265	0.021012
A_12_P101669	NM_073611	F57F5.3	-1.53834	0.00183725	0.104811	1.64323	0.00116845	0.068174
A_12_P101670	NM_077654	W06D11.5	1.56169	0.152144	1	-0.924833	0.380545	1
A_12_P101671	NM_073561	npp-22	0.0012434	0.99271	1	-0.999817	1.78577e-05	0.00426212
A_12_P101673	NM_064200	tag-276	0.396795	0.324864	1	-0.0561875	0.886404	1
A_12_P101674	NM_171188	R151.7	0.154961	0.205927	1	0.0229006	0.845684	1
A_12_P101679	NM_077278	F19C6.3	1.44866	1.08114e-05	0.00319438	-0.0246282	0.894876	1
A_12_P101680	NM_069579	R102.5	-0.0602782	0.809351	1	-0.273645	0.286744	1
A_12_P101681	NM_061211		0.646301	0.527723	1	0.268193	0.791577	1
A_12_P101682	NM_001026763	C08B11.9	0.541285	0.0906726	1	-0.849083	0.014726	0.439624
A_12_P101683	NM_065419	C03C10.2	-4.36698	1.98705e-06	0.00133964	1.09039	0.0370462	0.899226
A_12_P101684	NM_065605	F26A1.1	-0.0505222	0.721185	1	-0.646178	0.000806712	0.0526153
A_12_P101686	NM_066546	prx-19	-0.280546	0.0621874	1	-0.667074	0.000522587	0.0391019
A_12_P101687	NM_076876	F46C8.1	0.468776	0.00292965	0.148517	0.15009	0.241501	1
A_12_P101688	NM_073876		0.126288	0.311133	1	-0.307682	0.0262634	0.688615
A_12_P101690	NM_001027202	clh-1	0.0857591	0.581865	1	-0.425825	0.0177195	0.508237
A_12_P101691	NM_072275	ZK1055.2	0.634129	0.0350449	0.971723	0.163044	0.545926	1
A_12_P101692	NM_059448	rbx-2	0.364323	0.00886628	0.343122	-0.853824	1.72254e-05	0.00416289
A_12_P101693	NM_182301	Y57G11C.37	0.53535	0.0184988	0.597996	-0.303972	0.142496	1
A_12_P101694	NM_060900	C17H1.7	0.136122	0.879314	1	-0.90137	0.326387	1
A_12_P101695	NM_059622	K07G5.6	-0.0289829	0.845826	1	0.0801492	0.593117	1
A_12_P101696	NM_073216	ZK856.4	0.153293	0.43859	1	-0.783709	0.00198914	0.099527
A_12_P101697	NM_070154	Y67H2A.4	0.0823609	0.528242	1	0.0737988	0.571226	1
A_12_P101698	NM_063066	farl-11	-0.0127597	0.928235	1	0.0616236	0.665027	1
A_12_P101699	NM_073955	C56A3.6	0.405565	0.00599809	0.255871	-0.0073746	0.951119	1
A_12_P101700	NM_076922		-0.0579182	0.697117	1	0.444643	0.0115046	0.364719
A_12_P101701	NM_061191	F32A7.4	0.034119	0.811542	1	-0.466455	0.00722683	0.257597
A_12_P101702	NM_068711	ZC477.7	-3.0156	9.43718e-05	0.0117602	0.789678	0.135465	1
A_12_P101703	NM_001047671	aman-2	-0.0205686	0.878081	1	-0.132766	0.333436	1
A_12_P101704	NM_068423	fem-1	0.271819	0.141697	1	-0.473467	0.0193015	0.541564
A_12_P101705	NM_171514	smg-4	0.0474625	0.698438	1	-0.653579	0.000248158	0.0234685
A_12_P101706	NM_171081	rab-18	0.498001	0.0222937	0.691831	-0.18739	0.334656	1
A_12_P101707	NM_074335	K08F9.4	0.138349	0.500789	1	-0.479066	0.0358066	0.875365
A_12_P101708	NM_064523	Y39G8B.1	-0.265039	0.0825157	1	0.894838	6.29517e-05	0.00942414
A_12_P101710	NM_063836	gpd-1	0.0843735	0.543951	1	-0.943748	3.26981e-05	0.00609207
A_12_P101711	NM_077935		0.908116	0.000482444	0.0381651	-1.12053	9.20669e-05	0.0119777
A_12_P101712	NM_001025903	aex-1	0.8415	0.00403835	0.189268	0.629017	0.019839	0.5531
A_12_P101713	NM_070592	Y116A8A.4	-2.33968	4.61971e-06	0.0020683	0.570167	0.0580753	1
A_12_P101714	NM_171419	R07H5.11	0.215213	0.254593	1	-0.406761	0.0451677	1
A_12_P101715	NM_062907	rsp-5	0.339306	0.0325189	0.917298	-0.751887	0.000251236	0.0236633
A_12_P101717	NM_066559	ZK637.1	0.502015	0.0140983	0.487515	0.370941	0.0533483	1
A_12_P101718	NM_068335	W03F8.6	5.90023	1.8663e-05	0.00429709	4.76396	0.000114187	0.013837
A_12_P101719	NM_065453	R10E4.1	0.199151	0.161829	1	0.0174028	0.897708	1
A_12_P101720	NM_077455	W04G3.7	2.10322	0.00257866	0.135286	0.997589	0.089089	1
A_12_P101721	NM_068795	plk-3	-0.532739	0.0377576	1	-1.03721	0.000867562	0.0552568
A_12_P101722	NM_072299	W02F12.5	-0.249243	0.157761	1	-0.248829	0.158386	1
A_12_P101723	NM_066814	C05B5.1	-0.873368	0.0705261	1	0.318736	0.477791	1
A_12_P101724	NM_061779	T16A1.2	-4.4161	1.8644e-05	0.00429709	1.08923	0.0938003	1
A_12_P101725	NM_075774	sel-12	0.0401958	0.821653	1	-0.784656	0.00106249	0.0636959
A_12_P101726	NM_077195	gap-2	0.176183	0.284942	1	-0.768695	0.000567471	0.0412183
A_12_P101727	NM_072835	ZC190.2	0.1128	0.758055	1	0.154373	0.673988	1
A_12_P101729	NM_074172	C15H11.9	0.244857	0.128239	1	-0.0876338	0.566433	1
A_12_P101730	NM_070165	mex-5	-0.0804484	0.79002	1	-1.11843	0.00336178	0.145787
A_12_P101731	NM_001026640	sop-3	0.254528	0.0559269	1	0.0688655	0.572262	1
A_12_P101732	NM_074584		0.564573	0.12748	1	1.23722	0.00442351	0.178311
A_12_P101733	NM_068193	F19C7.3	1.16253	0.000589378	0.0441508	-1.88794	1.0971e-05	0.00315598
A_12_P101734	NM_077330	R07E3.6	-6.74228	2.38934e-06	0.00148012	-0.834676	0.270517	1
A_12_P101735	NM_069842	F38H4.4	-3.61157	6.53497e-05	0.00927699	0.874304	0.147692	1
A_12_P101736	NM_064451	Y48E1B.7	0.728066	0.0194317	0.621598	-0.35668	0.203969	1
A_12_P101737	NM_067795	Y38F2AR.3	0.0263671	0.824501	1	0.120029	0.324228	1
A_12_P101738	NM_075386	Y43F8B.12	1.34787	0.00606294	0.257685	1.66081	0.00161784	0.0858997
A_12_P101739	NM_074144	F14D7.7	-0.0126617	0.97947	1	0.318547	0.521752	1
A_12_P101740	NM_076330	mec-18	0.400746	0.100619	1	-0.0129528	0.954601	1
A_12_P101741	NM_069825	T12A7.6	0.755382	0.000274823	0.0252184	0.450934	0.00874527	0.296758
A_12_P101742	NM_061340	W10D9.5	0.0934803	0.481175	1	-0.184905	0.178161	1
A_12_P101744	AY037797	beta-1,6-N-acetylglucosaminyltransferase	1.42026	2.42244e-05	0.00496347	0.154754	0.446304	1
A_12_P101745	NM_001047602	ZK822.5	0.189424	0.54172	1	0.635305	0.0597607	1
A_12_P101746	NM_075381	M04C3.1	0.720492	0.0191282	0.614001	1.84138	2.95888e-05	0.00572522
A_12_P101747	NM_075469	lgc-55	0.603427	0.0468696	1	0.640067	0.0370352	0.899016
A_12_P101748	NM_062256	F54D10.5	0.33958	0.014945	0.508766	-0.996533	5.5912e-06	0.00202569
A_12_P101749	NM_069322	sdz-36	0.472942	0.101703	1	-4.56769	6.57201e-09	2.77279e-05
A_12_P101751	NM_062667	acdh-2	0.787324	0.140528	1	1.46615	0.0136249	0.413973
A_12_P101752	NM_071022	pqn-54	8.11212	2.81437e-06	0.00162635	9.64403	5.59314e-07	0.000462023
A_12_P101753	NM_001027885	peptidase	0.0918834	0.573257	1	0.389415	0.0328879	0.819848
A_12_P101754	NM_060337	Y106G6H.14	-0.0676649	0.678054	1	-0.608214	0.00314607	0.138701
A_12_P101755	NM_001026694	ZK265.9	-0.251304	0.178713	1	0.314676	0.100097	1
A_12_P101756	NM_068799	rod-1	0.0309262	0.846547	1	-0.432586	0.0192247	0.539885
A_12_P101758	NM_076281	T19D2.3	0.456492	0.0319213	0.904079	-0.364949	0.0746225	1
A_12_P101759	NM_001083183	ntl-3	0.533988	0.0402878	1	-0.0463858	0.842369	1
A_12_P101762	NM_001029375	F09E10.7	1.01031	0.000449973	0.0361948	0.196989	0.344936	1
A_12_P101763	NM_061886	bath-13	0.390592	0.0751465	1	-0.611603	0.0109541	0.351355
A_12_P101764	NM_060702	F56H6.2	0.497939	0.199682	1	-0.853793	0.040081	0.954353
A_12_P101765	NM_077809	R04D3.3	2.37617	0.00583364	0.250517	-2.04396	0.0133833	0.408564
A_12_P101766	NM_077628	lgc-18	2.82568	0.000140124	0.0155182	2.39544	0.000506547	0.0382445
A_12_P101767	NM_064959	fbxa-92	0.746422	0.298238	1	-0.247985	0.723174	1
A_12_P101768	NM_063444	C34C6.3	0.382143	0.323994	1	0.760337	0.0656287	1
A_12_P101769	NM_060946	W08E3.4	-3.35672	1.80123e-05	0.00423492	1.02518	0.0439956	1
A_12_P101770	NM_001028021	lec-11	0.153025	0.519026	1	1.53444	4.8954e-05	0.00801415
A_12_P101771	NM_001028014	F37C4.5	0.0640863	0.667956	1	-0.167615	0.274384	1
A_12_P101772	NM_070174	Y62E10A.10	-0.0833828	0.574212	1	0.10596	0.477377	1
A_12_P101773	NM_066745	ncx-6	-0.516879	0.029395	0.849828	-0.31013	0.159188	1
A_12_P101774	NM_068804	F55G1.1	-0.186122	0.386796	1	-0.384091	0.0910649	1
A_12_P101775	NM_063167	R10H1.1	0.542144	0.00865705	0.337338	1.1834	3.07791e-05	0.00586563
A_12_P101777	NM_001047787	tag-343	0.629565	0.00252675	0.133329	0.691609	0.00134461	0.0752451
A_12_P101778	NM_069890	F11A10.7	0.357361	0.0389137	1	-0.221628	0.172005	1
A_12_P101779	NM_065852	him-10	0.24978	0.1567	1	-0.740566	0.00103357	0.0624399
A_12_P101780	NM_067113	pqn-84	-2.58937	8.2676e-05	0.0108205	1.18708	0.0159686	0.468428
A_12_P101781	NM_001026810	C25H3.10	0.149474	0.571247	1	-0.827041	0.00869678	0.295574
A_12_P101782	NM_063359	M195.2	1.11024	0.00769833	0.308574	2.19622	5.94759e-05	0.00909407
A_12_P101784	NM_063469	F07H5.13	-0.338178	0.0634859	1	-1.39637	5.47716e-06	0.00199957
A_12_P101785	NM_077858	pab-2	-0.293347	0.0943969	1	0.060787	0.710224	1
A_12_P101786	NM_059259	F55F8.9	0.728124	0.00707542	0.289039	-0.412997	0.0853981	1
A_12_P101788	NM_062803	R12C12.3	0.156898	0.49024	1	0.0928835	0.680587	1
A_12_P101789	NM_076854	C10A4.1	0.634837	0.0627451	1	-3.75186	1.84865e-07	0.000228102
A_12_P101790	NM_077549	T04F8.6	0.417782	0.0151	0.512752	-0.00445065	0.975815	1
A_12_P101793	NM_065987	C56G2.3	0.921068	0.00252639	0.133328	0.0614822	0.796083	1
A_12_P101794	NM_064298	Y38E10A.16	-1.84403	0.00511764	0.226181	0.387289	0.47286	1
A_12_P101795			1.02652	0.148539	1	-0.63806	0.353785	1
A_12_P101796	NM_075226	Y51A2D.8	0.0905274	0.8251	1	0.668806	0.124241	1
A_12_P101797	NM_001029242	nas-37	-3.08358	8.60475e-05	0.0110807	-2.43331	0.000553683	0.0404819
A_12_P101798	NM_001026059	atx-2	-0.0911549	0.6398	1	-0.125839	0.520332	1
A_12_P101799	NM_069404	F44D12.1	-1.79826	2.60382e-06	0.00157247	-0.579643	0.0129472	0.398914
A_12_P101800	NM_171060	pll-1	0.945083	0.000300666	0.0269778	0.22117	0.238148	1
A_12_P101801	NM_062823	C29H12.5	0.161413	0.416887	1	-0.465292	0.0344656	0.84941
A_12_P101802	NM_059553	ser-3	0.38569	0.0239365	0.728069	-0.591005	0.00219336	0.106936
A_12_P101803	NM_077488	vhl-1	-0.217845	0.214479	1	-0.441286	0.0226658	0.614064
A_12_P101804	NM_072423	F09G2.8	0.0613143	0.630245	1	-0.706738	0.000179055	0.0187009
A_12_P101805	NM_060845	Y18D10A.8	-0.262763	0.195837	1	0.0304938	0.875517	1
A_12_P101808	NM_171350	lag-1	0.0353999	0.833925	1	-0.838242	0.000440417	0.0347914
A_12_P101810			-3.83704	4.34304e-05	0.00709747	1.00691	0.104416	1
A_12_P101811	NM_066290	ZK686.3	-0.380423	0.0282945	0.826815	0.23596	0.143739	1
A_12_P101812	NM_058629	dnj-30	-0.119431	0.391958	1	-0.094697	0.494325	1
A_12_P101813	NM_061287	cat-2	1.36903	0.00074227	0.0525343	0.475577	0.129563	1
A_12_P101814	NM_073440	lgc-49	0.675253	0.00158348	0.0936283	0.00327591	0.983899	1
A_12_P101815	NM_001025863	smn-1	0.020928	0.870198	1	-0.448122	0.0047929	0.189734
A_12_P101816	NM_171377	Y40C5A.4	0.6972	0.000424496	0.0346426	0.259878	0.0849328	1
A_12_P101817	NM_070445	Y73F8A.11	0.0325732	0.888362	1	0.105868	0.649774	1
A_12_P101819	NM_074423	T06E6.1	0.432087	0.0218989	0.682439	-0.218826	0.200658	1
A_12_P101820	NM_068964	pmk-1	0.258478	0.128478	1	0.556101	0.0050324	0.19668
A_12_P101821	NM_001047327	math-34	0.336815	0.29764	1	-3.53331	3.59849e-07	0.000348806
A_12_P101822	NM_071045	cdc-25.2	0.83626	0.00227488	0.123408	-1.91546	2.80184e-06	0.00132614
A_12_P101823	NM_001027625	set-1	0.149753	0.457034	1	-0.727609	0.00361982	0.153782
A_12_P101825	NM_062701	F59E12.11	0.0277747	0.822444	1	-0.46007	0.00328763	0.143316
A_12_P101826	NM_069574	R102.2	0.689284	0.0144031	0.495178	0.828938	0.00519633	0.201354
A_12_P101827	NM_060684	F14B6.2	1.31511	4.1048e-06	0.00196417	0.887448	0.000124024	0.0146402
A_12_P101828	NM_065661	R144.6	-0.027141	0.860616	1	-0.46118	0.0117849	0.371448
A_12_P101829	NM_073898	C50B6.3	0.333203	0.119924	1	-0.61007	0.0108617	0.349076
A_12_P101830	NM_067389	twk-40	0.773396	0.0055264	0.240401	0.0189332	0.933311	1
A_12_P101831	NM_001026883	D2085.5	-0.34018	0.021566	0.674151	-0.375027	0.0133427	0.407547
A_12_P101833	NM_072412	F10D2.8	1.62522	0.00330269	0.162617	0.656112	0.154318	1
A_12_P101834	NM_073954	C56A3.5	0.319645	0.0440714	1	-0.351727	0.0296383	0.75697
A_12_P101835	NM_059843	ZK265.3	-4.74696	5.19375e-05	0.00792155	0.694742	0.352905	1
A_12_P101836	NM_067543	glt-7	0.771094	0.0052523	0.230765	-0.278987	0.229395	1
A_12_P101838	NM_069534	egl-21	-0.0362567	0.845635	1	0.521081	0.0163527	0.477515
A_12_P101839	NM_062130	peptidase	-4.96886	1.07045e-06	0.000948324	0.740509	0.156673	1
A_12_P101841	NM_066690		-0.381157	0.133079	1	-0.473572	0.0694871	1
A_12_P101842	NM_063582	wdfy-2	-0.147791	0.484781	1	-0.899732	0.00124677	0.0713205
A_12_P101843	NM_001027788	Y82E9BR.14	-0.125862	0.404567	1	0.161626	0.289786	1
A_12_P101844	NM_060806	T26E3.4	0.00263712	0.985468	1	0.0628659	0.665646	1
A_12_P101846	NM_069936	C42C1.10	0.0334538	0.829259	1	-0.102091	0.514555	1
A_12_P101849	NM_075622	T03D8.2	0.175857	0.3188	1	-0.0353526	0.837274	1
A_12_P101851	NM_069596	T25B9.8	0.665821	0.00780599	0.31187	-0.517672	0.0276904	0.717541
A_12_P101852	NM_001026543	mat-1	-0.0157935	0.879169	1	-0.538651	0.000317684	0.0278938
A_12_P101853	NM_064713	ptr-20	3.63759	5.17e-08	0.000177946	1.77427	3.95386e-05	0.00693953
A_12_P101854	NM_072666	F43H9.3	0.121538	0.335893	1	-0.562749	0.000827593	0.0534794
A_12_P101855	NM_182167	tbc-15	0.619872	0.0978432	1	0.165475	0.636947	1
A_12_P101856	NM_068552	T13A10.1	-2.69118	5.03154e-05	0.00778183	1.17639	0.0150538	0.447346
A_12_P101857	NM_001029184		1.89904	0.000815657	0.0565847	1.45269	0.00482341	0.190708
A_12_P101858	NM_061895	K02F6.1	-1.35429	0.00251026	0.132584	1.42476	0.00179417	0.0923384
A_12_P101859	NM_068790	F13B6.1	-0.630614	0.0296434	0.855938	1.24609	0.000512121	0.0385022
A_12_P101860	NM_065846	cutl-23	2.67462	5.26424e-07	0.000620288	3.25722	7.9451e-08	0.000127601
A_12_P101861	NM_073433	nlp-33	1.07487	0.0120522	0.432346	1.92098	0.00026382	0.0244345
A_12_P101862	NM_001025880	gale-1	-1.65163	1.5599e-05	0.00388612	-0.649681	0.0129031	0.397904
A_12_P101863	NM_073806	ZC443.3	0.336601	0.258624	1	-0.319847	0.281618	1
A_12_P101864	NM_060614	Y47H9C.8	0.048263	0.67622	1	-0.431913	0.0031128	0.13759
A_12_P101865	NM_065741	ZK121.2	0.838537	0.00117383	0.0746414	0.699136	0.0038975	0.162586
A_12_P101867	NM_001026732	nspb-8	5.97428	4.88317e-05	0.00765934	6.36492	2.84155e-05	0.00557198
A_12_P101868	NM_070875	nhr-190	0.271648	0.140596	1	-0.0589446	0.735874	1
A_12_P101869	NM_001026404	pqn-52	-0.235761	0.275826	1	0.507204	0.0322754	0.808024
A_12_P101870	NM_078225	T27A8.2	0.813357	0.259864	1	-1.91366	0.0182422	0.518228
A_12_P101871	NM_062525	F33G12.2	-0.0150677	0.914306	1	-0.430835	0.0100243	0.328706
A_12_P101872	NM_001047491	JC8.11	0.103536	0.666571	1	-1.21701	0.000368459	0.030767
A_12_P101874	NM_078294	F22H10.4	1.26598	0.0313824	0.89307	-1.94262	0.00322283	0.141165
A_12_P101875	NM_001129062	Y106G6A.5	0.100922	0.501895	1	-0.344804	0.0382619	0.920932
A_12_P101876	NM_070632	sfa-1	0.643104	0.00605528	0.257471	0.193147	0.324135	1
A_12_P101877	NM_074613	C06C6.8	0.366997	0.363	1	0.819337	0.0589038	1
A_12_P101878	NM_072391	Y57E12AL.6	0.0506533	0.692454	1	-0.189408	0.158462	1
A_12_P101879	NM_061179	K11B4.1	0.150232	0.334909	1	-0.142161	0.360364	1
A_12_P101880	NM_001028272	Y37E11B.10	-3.55649	3.48507e-05	0.00616803	0.824339	0.136677	1
A_12_P101882	NM_001029614	K10B3.6	0.81021	0.00270962	0.140114	0.300819	0.174488	1
A_12_P101884	NM_066871	bbs-5	1.1369	8.58603e-05	0.0110711	0.17692	0.352368	1
A_12_P101888	NM_062877	C32D5.10	-0.144467	0.314994	1	-0.82336	0.000118142	0.0141588
A_12_P101889	NM_062558		-5.30909	0.000131259	0.0148082	0.132728	0.88474	1
A_12_P101891	NM_067374	F45G2.8	-0.109409	0.511557	1	0.01347	0.934887	1
A_12_P101892	NM_063787	F27E5.3	-3.72657	1.0199e-05	0.00308072	1.27368	0.0204356	0.565874
A_12_P101894	NM_076141	C15C7.5	0.299917	0.192988	1	1.55963	2.48627e-05	0.00515346
A_12_P101895	NM_069662	Y5F2A.4	0.100624	0.578159	1	-0.536837	0.011696	0.369405
A_12_P101896	NM_001029505	F46H5.2	-0.0312265	0.822106	1	-0.495975	0.00421782	0.172118
A_12_P101897	NM_064953	fbxa-63	0.567667	0.0163197	0.543125	0.721861	0.0043107	0.174763
A_12_P101898	NM_061815	F54A3.5	-0.00146421	0.989689	1	0.380756	0.00611451	0.227493
A_12_P101899	NM_064906	fbxa-51	-0.0914599	0.788258	1	0.337668	0.332215	1
A_12_P101900	NM_071648	fpn-1.3	1.83606	0.0197489	0.62923	-1.24761	0.0895057	1
A_12_P101902	NM_064706	Y53F4B.39	-0.236113	0.0850677	1	0.591548	0.000708457	0.0479608
A_12_P101903	NM_065254	H06I04.3	0.258575	0.0729074	1	0.08332	0.533629	1
A_12_P101904	NM_067484	grl-19	2.64467	0.0244112	0.739013	-1.30157	0.222663	1
A_12_P101906	NM_063674	fzr-1	0.73741	0.00246185	0.13066	-0.254656	0.197721	1
A_12_P101907	NM_069850	pph-2	-2.94351	1.18955e-05	0.00334829	0.936335	0.030617	0.776106
A_12_P101908	NM_072055	C24G6.6	-0.408482	0.0810058	1	0.103288	0.634762	1
A_12_P101912	NM_066653	ttr-5	-0.0806539	0.705616	1	0.0855336	0.688844	1
A_12_P101913	NM_059607	prpf-4	0.0881352	0.64828	1	-0.271726	0.177411	1
A_12_P101915			0.931342	0.0225858	0.697912	0.346775	0.340807	1
A_12_P101916	NM_062278	protease	-4.02679	0.000178692	0.0184949	0.828375	0.265943	1
A_12_P101917	NM_070573	sta-1	0.42467	0.0180477	0.586819	0.423563	0.018278	0.519021
A_12_P101918	NM_063808	T01E8.5	0.0900837	0.589346	1	0.254387	0.146028	1
A_12_P101919	NM_060112	skr-1	0.120929	0.319122	1	0.0755118	0.527583	1
A_12_P101920	NM_070801	B0554.1	2.82511	0.0583266	1	-0.996779	0.468976	1
A_12_P101921	NM_073936	F25H9.3	0.826603	0.0472745	1	0.728318	0.0744436	1
A_12_P101922	NM_171852	ceh-38	0.215816	0.206818	1	-0.710715	0.00119686	0.0692246
A_12_P101923	NM_069121	grsp-2	-0.236852	0.327261	1	0.364683	0.143597	1
A_12_P101924	NM_064773		-0.240895	0.133584	1	-0.208656	0.187795	1
A_12_P101925	NM_059444	ZC328.5	0.202541	0.692809	1	-1.13179	0.0459861	1
A_12_P101926	NM_076453	ZC449.2	-4.4994	2.11846e-05	0.00459752	-1.57889	0.0265235	0.693437
A_12_P101929	NM_062847	T24H7.3	0.0262868	0.838718	1	-0.355746	0.0176614	0.507127
A_12_P101930	NM_001028775	srh-194	1.42136	0.241486	1	-2.07633	0.0987419	1
A_12_P101931		rpl-14	0.081273	0.604366	1	0.0975888	0.535063	1
A_12_P101932	NM_061212	ZK337.1	-0.982428	0.00154584	0.0919151	-0.0858052	0.716324	1
A_12_P101933		fbxa-61	-0.129089	0.637884	1	0.0749817	0.783771	1
A_12_P101936	BJ116545	T28B11.1	0.167279	0.376236	1	-0.358548	0.0749262	1
A_12_P101937	NM_077948	F16B12.6	0.0379833	0.764304	1	-0.949171	1.47193e-05	0.00379717
A_12_P101938	NM_071947	cpt-4	-1.90277	0.000569481	0.04306	1.62833	0.00171893	0.0897733
A_12_P101939	NM_070122	B0564.3	-0.838864	0.000686942	0.0496297	0.133587	0.462163	1
A_12_P101941		F30F8.10	0.57637	0.00956622	0.363892	0.078698	0.67306	1
A_12_P101942	NM_076513	F35C8.8	0.488711	0.11719	1	-2.04325	2.78011e-05	0.00550069
A_12_P101944			0.291121	0.317178	1	0.652502	0.0396674	0.94686
A_12_P101946	NM_001047219	T20F10.2	0.00950735	0.934365	1	0.263966	0.040623	0.964274
A_12_P101947	NM_001129509	R02D5.8	-0.0607548	0.651956	1	-0.705825	0.000282428	0.0256113
A_12_P101948	NM_072700	D1014.2	-2.54868	0.00118265	0.0750389	0.520362	0.384867	1
A_12_P101949			2.6558	0.000173569	0.0180984	1.2058	0.0257826	0.67891
A_12_P101951	NM_064949	Y119D3B.21	-0.287275	0.0861841	1	0.0961557	0.539009	1
A_12_P101952	NM_062602	bmy-1	-0.243289	0.0523834	1	-0.744993	4.749e-05	0.00786206
A_12_P101953	NM_065074	B0524.6	0.733201	0.0697433	1	-0.186723	0.616914	1
A_12_P101955	NM_063429	hyaluronidase	-0.33652	0.215465	1	-0.623022	0.0341092	0.842498
A_12_P101956	NM_067730	Y41D4A.3	-0.0715409	0.639936	1	-0.808085	0.000263913	0.0244345
A_12_P101957	NM_171670	dpy-23	-0.46071	0.0856506	1	-0.976667	0.00229188	0.110436
A_12_P101958	NM_066590	F59B2.5	-0.61248	0.00482473	0.21633	0.362089	0.0596076	1
A_12_P101959	NM_064872	far-8	0.199628	0.160069	1	0.988685	1.83672e-05	0.00432063
A_12_P101960	NM_001129268	Y71H2AM.14	0.291524	0.258464	1	0.488683	0.0720803	1
A_12_P101961	NM_067871	ubc-13	0.379242	0.0165415	0.548831	-0.0652138	0.632855	1
A_12_P101962	NM_065095	Y39A3A.3	-0.504414	0.269498	1	-0.369239	0.412302	1
A_12_P101965	NM_064939	cdh-12	-5.83706	1.95176e-05	0.00439117	-0.141394	0.860275	1
A_12_P101966	NM_063298	C41C4.1	0.895052	0.000190886	0.0194139	-0.652372	0.00194286	0.0976642
A_12_P101967	NM_077786	nlp-3	0.672597	0.00508578	0.225026	0.714448	0.00351406	0.150576
A_12_P101968	NM_001129691	K09A9.6	0.138699	0.428527	1	0.217364	0.224833	1
A_12_P101970	NM_059699	T28F4.3	-3.02619	0.000825344	0.0570953	0.97214	0.163217	1
A_12_P101971	NM_060776	W02D9.2	-0.50034	0.0037434	0.179364	-0.132317	0.346031	1
A_12_P101973	NM_061911	D2062.1	-3.44552	0.000244085	0.0231783	0.331368	0.608164	1
A_12_P101974	NM_171650	klp-4	0.199489	0.291901	1	0.156116	0.404428	1
A_12_P101975	NM_064683	pde-3	0.996345	0.0152842	0.517262	-0.731186	0.0579993	1
A_12_P101977	NM_067084	such-1	0.144988	0.449032	1	-0.282952	0.154862	1
A_12_P101979	NM_065476	B0285.6	0.7435	0.000946651	0.0631168	-0.415386	0.0277795	0.719424
A_12_P101980	NM_061315	D1069.4	0.745702	0.0363349	0.999434	-1.48702	0.000681761	0.046696
A_12_P101981	NM_068739	R13A1.7	-0.158412	0.825706	1	0.576654	0.429605	1
A_12_P101982	NM_001026617	aat-9	0.0914711	0.667868	1	-1.09606	0.000328346	0.0285602
A_12_P101984	NM_066167	acs-16	0.218719	0.195237	1	0.235907	0.165159	1
A_12_P101985	NM_072695	D1014.6	-7.76436	2.80278e-05	0.00544695	-0.588508	0.599567	1
A_12_P101987	NM_063518	F44G4.2	-0.0438219	0.777262	1	0.0120902	0.937673	1
A_12_P101988	NM_076525	ddr-1	0.354209	0.196391	1	0.397054	0.151703	1
A_12_P101989	NM_077598	nfya-1	0.147852	0.549972	1	-1.51704	7.71451e-05	0.0107264
A_12_P101990	NM_171657	erp-1	0.846389	0.00190702	0.108006	0.331173	0.135124	1
A_12_P101991	NM_061052	F47G4.4	0.578321	0.00448228	0.205134	0.32727	0.0666175	1
A_12_P101992	NM_182356	unc-61	-0.00329055	0.983862	1	-0.509939	0.00907094	0.30475
A_12_P101993	NM_066866	Y70G10A.3	0.375689	0.186648	1	-0.0783095	0.773833	1
A_12_P101995	NM_062360	Y52E8A.1	0.46752	0.0241196	0.73222	-0.851186	0.000667271	0.0459819
A_12_P101996	NM_076183	ZK563.5	-0.356485	0.15591	1	-0.996063	0.00153872	0.0828309
A_12_P101997	NM_001136293	F16A11.1	0.654762	0.00257591	0.135159	-0.871194	0.000338892	0.0291671
A_12_P101999	NM_001029311	C52B9.2	0.624222	0.00488378	0.218304	0.908754	0.000372435	0.0309653
A_12_P102000	NM_068085	F49F1.5	1.05025	0.0015541	0.0922526	1.82534	2.0057e-05	0.00452919
A_12_P102001	NM_001047282	mps-1	0.921577	0.000296346	0.0266939	-0.172079	0.339673	1
A_12_P102002	NM_069169	C53D6.6	0.386968	0.0432727	1	-1.0964	6.01366e-05	0.00914223
A_12_P102004	NM_063845	ZK673.3	0.351321	0.0984347	1	-0.978225	0.000460512	0.0358377
A_12_P102005	NM_170989	C27D6.4	-0.254912	0.110046	1	-0.435922	0.0132255	0.404877
A_12_P102006	NM_001047343	math-42	-1.29742	0.0367914	1	-0.738735	0.200937	1
A_12_P102007	NM_181938	asd-1	0.494239	0.0597225	1	-1.36567	0.000149202	0.0165704
A_12_P102008	NM_066258	R13A5.7	0.351064	0.0346285	0.962686	-0.777663	0.000282831	0.0256236
A_12_P102009	NM_075400	nlp-25	3.24845	0.00134993	0.082957	4.90075	5.66415e-05	0.008781
A_12_P102010	NM_064441	F54F11.2	-0.128689	0.333273	1	0.377706	0.0135026	0.411214
A_12_P102011	NM_060970	Y48G10A.1	-0.170976	0.249228	1	-0.375104	0.0226976	0.614756
A_12_P102014	NM_001026168	spe-10	-1.17858	0.0266729	0.790586	0.978801	0.0566499	1
A_12_P102015	NM_066352	K12H4.6	-0.477162	0.150088	1	0.0248008	0.937093	1
A_12_P102018	NM_070036	unc-31	-0.00898778	0.960399	1	-0.827698	0.000814955	0.0529272
A_12_P102019	NM_062495	R05F9.11	0.35789	0.146997	1	-0.560977	0.0332333	0.826305
A_12_P102020	NM_182112	rol-8	-3.62733	0.0122923	0.438872	1.50302	0.236503	1
A_12_P102021	NM_067365	F11F1.6	-0.563225	0.00602927	0.256755	0.238045	0.174666	1
A_12_P102024	NM_182410	abu-4	6.6114	2.55871e-08	0.000125516	8.02342	3.7903e-09	1.99204e-05
A_12_P102025	NM_070423		0.799062	0.000967097	0.0640447	-0.922346	0.000334214	0.0289112
A_12_P102026	NM_001028962	str-180	0.268504	0.46678	1	1.78237	0.000492689	0.0374867
A_12_P102027	NM_070838	nhr-155	0.849484	0.0387045	1	-4.06085	4.16666e-07	0.000383778
A_12_P102029	NM_063694	wee-1.3	-0.0898077	0.712444	1	-0.840094	0.00514896	0.200032
A_12_P102030	NM_063969	F33A8.6	0.296485	0.0870485	1	-0.714092	0.000991706	0.0607695
A_12_P102032	NM_074467	acr-18	0.51603	0.0283942	0.82866	-0.638164	0.0100049	0.328206
A_12_P102033	NM_076648	W05H9.2	0.257273	0.0981992	1	-1.33198	2.36281e-06	0.00118654
A_12_P102035	NM_058556	Y39G10AR.9	-0.117068	0.344216	1	-0.745202	8.02144e-05	0.0110281
A_12_P102036	NM_071707	nlp-30	1.5028	1.12144e-05	0.00325462	3.98498	9.75846e-10	9.81789e-06
A_12_P102037	NM_074934	ZK218.7	2.15602	0.0012527	0.078431	1.62322	0.00753974	0.265638
A_12_P102038	NM_182195	btb-2	-1.87948	7.88687e-05	0.0104782	1.06711	0.00476102	0.188907
A_12_P102040	NM_068837	F45E4.3	1.15175	0.000569761	0.0430668	0.610384	0.0257426	0.678039
A_12_P102042	NM_061370	clec-118	-0.401543	0.209427	1	-0.722365	0.0362311	0.88365
A_12_P102043	NM_078345	K02H8.1	1.06919	0.000648859	0.0475614	0.948027	0.00152308	0.0822372
A_12_P102044	NM_060222	F52F12.5	-3.82182	7.53155e-05	0.0101309	0.788558	0.218072	1
A_12_P102045	NM_071170	F36F12.1	-3.1792	1.69905e-05	0.00408818	-1.488	0.00516405	0.20044
A_12_P102047	NM_171668	paf-2	0.393745	0.0504117	1	0.445839	0.0304526	0.773084
A_12_P102048	NM_069375	F32B6.3	0.154466	0.387425	1	-0.551805	0.00887098	0.299848
A_12_P102049	NM_073784	C15C8.3	-0.612869	0.00763068	0.306417	0.368751	0.0736117	1
A_12_P102050	NM_072044	ZC317.6	-3.18489	2.54672e-05	0.00510854	0.500055	0.282388	1
A_12_P102053	NM_062028	B0454.5	-2.2833	1.24149e-05	0.00343834	-0.126526	0.672801	1
A_12_P102054	NM_070633		-0.0117698	0.91762	1	-0.0541007	0.63632	1
A_12_P102055	NM_069179	lpl-1	0.0819559	0.457399	1	-0.532661	0.000491191	0.0373945
A_12_P102056	NM_001025956	psd-1	-0.0598297	0.662047	1	-0.383352	0.0159661	0.468389
A_12_P102057	NM_171673	pqn-65	0.646315	0.0384624	1	0.276705	0.332689	1
A_12_P102058	NM_060361	F25H2.6	0.649676	0.00205591	0.114591	-0.025465	0.875444	1
A_12_P102060	NM_060451	Y95D11A.1	0.0491469	0.742312	1	0.109816	0.467351	1
A_12_P102061	NM_001047656	F53C11.5	0.164479	0.296572	1	-0.387369	0.0265172	0.693437
A_12_P102062	NM_077188	ZK899.2	-0.31872	0.114785	1	0.432061	0.0410532	0.972252
A_12_P102063	NM_064979	fbxa-20	0.466347	0.0697437	1	0.203766	0.396456	1
A_12_P102065		Y39A1A.2	-2.77707	3.35766e-05	0.00601794	0.280755	0.494982	1
A_12_P102066	NM_060874	selb-1	0.16619	0.295632	1	-0.600853	0.00247935	0.116718
A_12_P102067	NM_061144	Y105E8B.5	-0.0991134	0.506743	1	0.118197	0.430647	1
A_12_P102069	NM_072068	glb-6	0.627634	0.0282678	0.82619	0.746189	0.0122747	0.382704
A_12_P102070	NM_071119	knl-3	-0.12577	0.439073	1	-0.440837	0.0177653	0.509105
A_12_P102071	NM_059494	F57B10.4	-0.0348578	0.860683	1	-0.296246	0.156492	1
A_12_P102072	NM_060102	C17E4.4	0.503686	0.0142213	0.490857	-0.472657	0.0194753	0.545012
A_12_P102073	NM_075976	Y102A11A.8	-0.258767	0.267714	1	-1.02998	0.000840257	0.0540485
A_12_P102075	NM_063097	srd-59	1.07198	0.00962114	0.365562	0.168819	0.627361	1
A_12_P102076	NM_076458	Y64H9A.1	-0.0577591	0.654966	1	0.147804	0.265602	1
A_12_P102077	NM_001026314	F52F12.8	-3.10211	0.00192497	0.108647	0.867249	0.273344	1
A_12_P102078	NM_171710	kqt-1	0.0101273	0.958216	1	0.164475	0.403249	1
A_12_P102079	NM_072849	ZC196.3	-0.80856	0.0679224	1	-0.61461	0.151152	1
A_12_P102081	NM_062038	Y25C1A.7	-0.228704	0.136287	1	0.0895117	0.54067	1
A_12_P102082	NM_074049	C06B3.6	0.408424	0.309324	1	1.63917	0.00150683	0.0815507
A_12_P102083	NM_001027192	tag-180	0.626394	0.00511108	0.225967	-0.257826	0.174089	1
A_12_P102084	NM_064123	F43G6.5	0.167622	0.716824	1	-2.40312	0.000304054	0.0269856
A_12_P102085		ttr-52	1.8469	0.00691208	0.28435	1.21242	0.0507703	1
A_12_P102086	NM_066820	rgs-1	0.72401	0.00343362	0.167633	-0.383181	0.07226	1
A_12_P102087	NM_064350	F58G1.1	-0.372351	0.141049	1	-0.710337	0.0121115	0.379003
A_12_P102088	NM_171882	F56C9.10	0.0760999	0.6515	1	-0.607989	0.00386045	0.161504
A_12_P102089	NM_001028036	mbk-2	0.701482	0.000825851	0.0571102	-0.668748	0.00115994	0.0678995
A_12_P102092	NM_059652	let-75	0.0822752	0.800797	1	0.529963	0.125637	1
A_12_P102093	NM_061751	F59H6.3	0.180739	0.429633	1	-0.242826	0.29456	1
A_12_P102094	NM_077612	B0198.2	0.985823	0.000290394	0.0262967	-0.828615	0.00105319	0.0632744
A_12_P102095	NM_065204	Y71H2AM.10	0.557949	0.00445335	0.204297	0.0546134	0.72946	1
A_12_P102096	NM_077599	lsd-1	-0.141284	0.426787	1	-2.51143	3.36683e-08	7.23852e-05
A_12_P102097	NM_067562	K11H12.1	0.0784441	0.548455	1	0.0016496	0.989839	1
A_12_P102098	NM_076468	C42D8.1	0.137859	0.575502	1	1.74606	2.26474e-05	0.00483791
[truncated: 33,774 more rows]
